# Supplementary material
Source: publisher figshare collection journal article supplement (https://acs.figshare.com/ndownloader/files/6694932)
Supplement: Supplementary file 1 [file 6694932]

 
data_tbc83nii
 
_audit_creation_method            'SHELXL-2014/7'
_shelx_SHELXL_version_number      '2014/7'
_chemical_name_systematic         ?
_chemical_name_common             ;TbNC@Cs(6)-C82/Ni(OEP)/2benzene;
_chemical_melting_point           ?
_chemical_formula_moiety          
;
Tb CN C82, Ni N4 C36 H44, 2 (C6 H6)
; 
_chemical_formula_sum
 'C131 H56 N5 Ni Tb' 
_chemical_formula_weight          1917.43

loop_
 _atom_type_symbol
 _atom_type_description
 _atom_type_scat_dispersion_real
 _atom_type_scat_dispersion_imag
 _atom_type_scat_source
 'C'  'C'   0.0181   0.0091
 'International Tables Vol C Tables 4.2.6.8 and 6.1.1.4'
 'N'  'N'   0.0311   0.0180
 'International Tables Vol C Tables 4.2.6.8 and 6.1.1.4'
 'Ni'  'Ni'  -3.0029   0.5091
 'International Tables Vol C Tables 4.2.6.8 and 6.1.1.4'
 'Tb'  'Tb'  -9.1472   9.1891
 'International Tables Vol C Tables 4.2.6.8 and 6.1.1.4'
 'H'  'H'   0.0000   0.0000
 'International Tables Vol C Tables 4.2.6.8 and 6.1.1.4'
 
_space_group_crystal_system       monoclinic
_space_group_IT_number            12
_space_group_name_H-M_alt         'C 2/m'
_space_group_name_Hall            '-C 2y'
 
_shelx_space_group_comment
;
The symmetry employed for this shelxl refinement is uniquely defined
by the following loop, which should always be used as a source of
symmetry information in preference to the above space-group names.
They are only intended as comments.
;
 
loop_
 _space_group_symop_operation_xyz
 'x, y, z'
 '-x, y, -z'
 'x+1/2, y+1/2, z'
 '-x+1/2, y+1/2, -z'
 '-x, -y, -z'
 'x, -y, z'
 '-x+1/2, -y+1/2, -z'
 'x+1/2, -y+1/2, z'
 
_cell_length_a                    25.3335(14)
_cell_length_b                    15.0135(11)
_cell_length_c                    19.8630(13)
_cell_angle_alpha                 90
_cell_angle_beta                  93.987(6)
_cell_angle_gamma                 90
_cell_volume                      7536.5(9)
_cell_formula_units_Z             4
_cell_measurement_temperature     100(2)
_cell_measurement_reflns_used     3013
_cell_measurement_theta_min       3.9460
_cell_measurement_theta_max       63.7480
 
_exptl_crystal_description        block
_exptl_crystal_colour             black
_exptl_crystal_density_meas       ?
_exptl_crystal_density_method     'not measured'
_exptl_crystal_density_diffrn     1.690          
_exptl_crystal_F_000              3880
_exptl_transmission_factor_min    ?
_exptl_transmission_factor_max    ?
_exptl_crystal_size_max           0.020
_exptl_crystal_size_mid           0.010
_exptl_crystal_size_min           0.010
_exptl_absorpt_coefficient_mu     5.421
_shelx_estimated_absorpt_T_min    0.899
_shelx_estimated_absorpt_T_max    0.948
_exptl_absorpt_correction_type    'multi-scan'
_exptl_absorpt_correction_T_min   0.8993
_exptl_absorpt_correction_T_max   0.9478
_exptl_absorpt_process_details    
;
CrysAlisPro, Agilent Technologies,
Version 1.171.36.28 (release 01-02-2013 CrysAlis171 .NET)
(compiled Feb  1 2013,16:14:44)
Empirical absorption correction using spherical harmonics,
 implemented in SCALE3 ABSPACK scaling algorithm.
;
_exptl_absorpt_special_details    ?
_diffrn_ambient_temperature       100(2)
_diffrn_radiation_wavelength      1.54178
_diffrn_radiation_type            CuK\a
_diffrn_source                    'SuperNova (Cu) X-ray Source'
_diffrn_measurement_device_type   'SuperNova, Dual, Cu at zero, Atlas'
_diffrn_measurement_method        '\w scans'
_diffrn_detector_area_resol_mean  10.3415
_diffrn_reflns_number             14934
_diffrn_reflns_av_unetI/netI      0.1026
_diffrn_reflns_av_R_equivalents   0.0900
_diffrn_reflns_limit_h_min        -29
_diffrn_reflns_limit_h_max        19
_diffrn_reflns_limit_k_min        -16
_diffrn_reflns_limit_k_max        17
_diffrn_reflns_limit_l_min        -22
_diffrn_reflns_limit_l_max        23
_diffrn_reflns_theta_min          3.424
_diffrn_reflns_theta_max          66.052
_diffrn_reflns_theta_full         66.052
_diffrn_measured_fraction_theta_max   0.963
_diffrn_measured_fraction_theta_full  0.963
_diffrn_reflns_Laue_measured_fraction_max    0.963
_diffrn_reflns_Laue_measured_fraction_full   0.963
_diffrn_reflns_point_group_measured_fraction_max   0.963
_diffrn_reflns_point_group_measured_fraction_full  0.963
_reflns_number_total              6607
_reflns_number_gt                 4139
_reflns_threshold_expression      'I > 2\s(I)'
_reflns_Friedel_coverage          0.000
_reflns_Friedel_fraction_max      .
_reflns_Friedel_fraction_full     .
 
_reflns_special_details
;
 Reflections were merged by SHELXL according to the crystal
 class for the calculation of statistics and refinement.
 
 _reflns_Friedel_fraction is defined as the number of unique
 Friedel pairs measured divided by the number that would be
 possible theoretically, ignoring centric projections and
 systematic absences.
;
_computing_data_collection        
;
CrysAlisPro, Agilent Technologies,
Version 1.171.36.28 (release 01-02-2013 CrysAlis171 .NET)
(compiled Feb  1 2013,16:14:44)
;
_computing_cell_refinement        
;
CrysAlisPro, Agilent Technologies,
Version 1.171.36.28 (release 01-02-2013 CrysAlis171 .NET)
(compiled Feb  1 2013,16:14:44)
;
_computing_data_reduction         
;
CrysAlisPro, Agilent Technologies,
Version 1.171.36.28 (release 01-02-2013 CrysAlis171 .NET)
(compiled Feb  1 2013,16:14:44)
;
_computing_structure_solution   'SHELXS-97 (Sheldrick, 1990)'
_computing_structure_refinement 'SHELXL-2014/7 (Sheldrick, 2014)'
_computing_molecular_graphics   'Bruker SHELXTL'
_computing_publication_material 'Bruker SHELXTL'
_refine_special_details          
; 
 Refinement of F^2^ against ALL reflections.  The weighted R-factor wR and 
 goodness of fit S are based on F^2^, conventional R-factors R are based 
 on F, with F set to zero for negative F^2^. The threshold expression of 
 F^2^ > 2sigma(F^2^) is used only for calculating R-factors(gt) etc. and is 
 not relevant to the choice of reflections for refinement.  R-factors based 
 on F^2^ are statistically about twice as large as those based on F, and R- 
 factors based on ALL data will be even larger. 
; 
_refine_ls_structure_factor_coef  Fsqd
_refine_ls_matrix_type            full
_refine_ls_weighting_scheme       calc
_refine_ls_weighting_details
'w=1/[\s^2^(Fo^2^)+(0.1516P)^2^+32.0498P] where P=(Fo^2^+2Fc^2^)/3'
_atom_sites_solution_primary      direct
_atom_sites_solution_secondary    difmap
_atom_sites_solution_hydrogens    geom
_refine_ls_hydrogen_treatment     constr
_refine_ls_extinction_method      none
_refine_ls_extinction_coef        .
_refine_ls_number_reflns          6607
_refine_ls_number_parameters      996
_refine_ls_number_restraints      1177
_refine_ls_R_factor_all           0.1473
_refine_ls_R_factor_gt            0.1010
_refine_ls_wR_factor_ref          0.3004
_refine_ls_wR_factor_gt           0.2512
_refine_ls_goodness_of_fit_ref    1.035
_refine_ls_restrained_S_all       1.149
_refine_ls_shift/su_max           0.009
_refine_ls_shift/su_mean          0.000
 
loop_
 _atom_site_label
 _atom_site_type_symbol
 _atom_site_fract_x
 _atom_site_fract_y
 _atom_site_fract_z
 _atom_site_U_iso_or_equiv
 _atom_site_adp_type
 _atom_site_occupancy
 _atom_site_site_symmetry_order  
 _atom_site_calc_flag
 _atom_site_refinement_flags_posn
 _atom_site_refinement_flags_adp
 _atom_site_refinement_flags_occupancy
 _atom_site_disorder_assembly
 _atom_site_disorder_group
Tb1 Tb 0.66291(13) 0.91165(15) 0.7220(2) 0.0320(7) Uani 0.215(3) 1 d . . P A 1
N1 N 0.7281(8) 1.0000 0.6947(13) 0.185(11) Uani 1 2 d S T P A 1
C83 C 0.6988(10) 1.0000 0.6566(12) 0.188(17) Uani 1 2 d S T P A 1
Tb2 Tb 0.6864(3) 0.8940(4) 0.7484(3) 0.0320(7) Uani 0.093(2) 1 d . . P B 2
Tb3 Tb 0.6528(6) 0.9048(11) 0.6995(10) 0.0320(7) Uani 0.041(3) 1 d . . P C 3
Tb4 Tb 0.6696(15) 0.906(2) 0.7549(18) 0.0320(7) Uani 0.019(2) 1 d . . P D 4
Tb5 Tb 0.655(2) 0.908(4) 0.690(3) 0.58(4) Uiso 0.124(3) 1 d . . P E 5
Tb6 Tb 0.6217(11) 1.0000 0.6781(14) 0.0320(7) Uani 0.0177(14) 2 d S T P F 6
C01A C 0.5932(8) 0.8212(16) 0.5613(11) 0.081(5) Uani 0.5 1 d D U P A 1
C02A C 0.5577(7) 0.8651(14) 0.6021(10) 0.063(4) Uani 0.5 1 d D U P A 1
C03A C 0.5692(9) 0.8340(18) 0.6657(10) 0.060(5) Uani 0.5 1 d D U P A 1
C04A C 0.6133(9) 0.7712(18) 0.6602(12) 0.077(6) Uani 0.5 1 d D U P A 1
C05A C 0.6355(11) 0.788(2) 0.5995(13) 0.093(6) Uani 0.5 1 d D U P A 1
C06A C 0.6858(14) 0.769(2) 0.5894(13) 0.098(6) Uani 0.5 1 d D U P A 1
C07A C 0.7210(10) 0.7401(18) 0.6503(12) 0.091(6) Uani 0.5 1 d D U P A 1
C08A C 0.6973(10) 0.7282(19) 0.7055(11) 0.077(6) Uani 0.5 1 d D U P A 1
C09A C 0.6464(8) 0.7453(12) 0.7116(9) 0.065(5) Uani 0.5 1 d D U P A 1
C10A C 0.6414(9) 0.7829(12) 0.7858(9) 0.069(4) Uani 0.5 1 d D U P A 1
C11A C 0.6023(11) 0.8575(18) 0.7940(11) 0.075(5) Uani 0.5 1 d . U P A 1
C12A C 0.5609(7) 0.8924(16) 0.7261(10) 0.065(4) Uani 0.5 1 d . U P A 1
C13A C 0.5642(7) 1.0488(18) 0.7624(13) 0.090(5) Uani 0.5 1 d . U P A 1
C14A C 0.5457(4) 1.0000 0.7089(9) 0.087(4) Uani 1 2 d S TU P A 1
C15A C 0.5444(7) 0.9515(13) 0.5910(10) 0.076(4) Uani 0.5 1 d D U P A 1
C16A C 0.5971(5) 1.0000 0.8232(7) 0.092(4) Uani 1 2 d DS TU P A 1
C17A C 0.6199(7) 0.9121(13) 0.8378(8) 0.063(4) Uani 0.5 1 d D U P A 1
C18A C 0.6736(6) 0.9162(8) 0.8780(6) 0.038(3) Uani 0.5 1 d D U P A 1
C19A C 0.7143(10) 0.8587(12) 0.8676(7) 0.056(4) Uani 0.5 1 d . U P A 1
C20A C 0.6903(9) 0.7864(12) 0.8185(8) 0.066(4) Uani 0.5 1 d D U P A 1
C21A C 0.7271(11) 0.7492(17) 0.7740(12) 0.086(5) Uani 0.5 1 d D U P A 1
C22A C 0.7721(12) 0.773(2) 0.7777(11) 0.071(5) Uani 0.5 1 d D U P A 1
C23A C 0.7910(7) 0.8420(16) 0.8225(10) 0.062(5) Uani 0.5 1 d D U P A 1
C24A C 0.7712(9) 0.8857(19) 0.8660(14) 0.067(5) Uani 0.5 1 d . U P A 1
C25A C 0.7854(6) 1.0000 0.8786(7) 0.096(4) Uani 1 2 d DS TU P A 1
C26A C 0.6901(5) 1.0000 0.8942(5) 0.071(3) Uani 1 2 d DS TU P A 1
C27A C 0.7994(8) 0.7819(13) 0.7104(9) 0.083(5) Uani 0.5 1 d D U P A 1
C28A C 0.7774(10) 0.7648(16) 0.6556(13) 0.085(5) Uani 0.5 1 d D U P A 1
C29A C 0.7910(8) 0.8178(16) 0.5980(10) 0.083(5) Uani 0.5 1 d D U P A 1
C30A C 0.7060(12) 0.8175(19) 0.5382(15) 0.114(6) Uani 0.5 1 d D U P A 1
C31A C 0.8403(7) 0.8979(17) 0.7842(12) 0.096(5) Uani 0.5 1 d D U P A 1
C32A C 0.8492(5) 1.0000 0.7972(11) 0.108(3) Uani 1 2 d S TU P A 1
C33A C 0.8398(8) 0.8461(16) 0.7137(10) 0.076(5) Uani 0.5 1 d D U P A 1
C34A C 0.8485(9) 0.9010(17) 0.6538(12) 0.102(6) Uani 0.5 1 d D U P A 1
C35A C 0.8260(8) 0.8858(14) 0.6020(10) 0.104(3) Uani 0.5 1 d D U P A 1
C36A C 0.7550(9) 0.8413(15) 0.5464(11) 0.093(5) Uani 0.5 1 d D U P A 1
C37A C 0.6678(9) 0.8720(17) 0.5010(12) 0.098(6) Uani 0.5 1 d D U P A 1
C38A C 0.6183(9) 0.8719(18) 0.5137(12) 0.090(5) Uani 0.5 1 d D U P A 1
C39A C 0.8151(8) 0.9628(15) 0.5437(10) 0.104(3) Uani 0.5 1 d D U P A 1
C40A C 0.7703(8) 0.9346(15) 0.5116(12) 0.104(3) Uani 0.5 1 d D U P A 1
C41A C 0.6026(8) 0.9601(16) 0.5040(10) 0.100(6) Uani 0.5 1 d D U P A 1
C42A C 0.8643(5) 1.0000 0.6699(9) 0.108(3) Uani 1 2 d DS TU P A 1
C43A C 0.8228(10) 1.0515(16) 0.5683(12) 0.132(7) Uani 0.5 1 d D U P A 1
C44A C 0.7373(8) 1.0000 0.4885(9) 0.130(5) Uani 1 2 d DS TU P A 1
C45A C 0.6816(9) 0.9559(13) 0.4814(9) 0.106(6) Uani 0.5 1 d D U P A 1
C46A C 0.7430(6) 1.0398(12) 0.8942(7) 0.072(4) Uani 0.5 1 d D U P A 1
C47A C 0.8243(6) 1.0250(16) 0.8421(9) 0.089(5) Uani 0.5 1 d D U P A 1
C48A C 0.7940(10) 1.210(2) 0.6487(14) 0.111(7) Uani 0.5 1 d D U P A 1
C49A C 0.5688(6) 1.0000 0.5383(8) 0.092(4) Uani 1 2 d DS TU P A 1
C50A C 0.5773(8) 1.0909(14) 0.5618(11) 0.092(5) Uani 0.5 1 d D U P A 1
C51A C 0.5540(8) 1.0988(15) 0.6261(12) 0.083(5) Uani 0.5 1 d D U P A 1
C52A C 0.5374(4) 1.0000 0.6459(9) 0.086(4) Uani 1 2 d DS TU P A 1
C53A C 0.6140(10) 1.148(2) 0.5567(15) 0.099(6) Uani 0.5 1 d D U P A 1
C54A C 0.6498(11) 1.1109(19) 0.5170(15) 0.116(7) Uani 0.5 1 d D U P A 1
C55A C 0.6454(8) 1.0000 0.4863(8) 0.119(5) Uani 1 2 d DS TU P A 1
C56A C 0.6277(11) 1.233(2) 0.6052(18) 0.086(7) Uani 0.5 1 d D U P A 1
C57A C 0.6004(12) 1.229(3) 0.6750(16) 0.097(7) Uani 0.5 1 d D U P A 1
C58A C 0.5652(11) 1.157(2) 0.6882(16) 0.084(6) Uani 0.5 1 d D U P A 1
C59A C 0.6852(10) 1.247(2) 0.6119(13) 0.087(6) Uani 0.5 1 d D U P A 1
C60A C 0.7199(8) 1.2103(17) 0.5699(11) 0.095(6) Uani 0.5 1 d D U P A 1
C61A C 0.6986(10) 1.1413(16) 0.5147(12) 0.121(6) Uani 0.5 1 d D U P A 1
C62A C 0.7419(8) 1.0826(15) 0.5042(10) 0.106(6) Uani 0.5 1 d D U P A 1
C63A C 0.8345(8) 1.1554(16) 0.6734(12) 0.102(6) Uani 0.5 1 d D U P A 1
C64A C 0.7580(7) 1.2506(13) 0.7006(10) 0.083(5) Uani 0.5 1 d D U P A 1
C65A C 0.8504(8) 1.0689(15) 0.6264(12) 0.110(6) Uani 0.5 1 d D U P A 1
C66A C 0.7515(9) 1.1294(17) 0.8691(17) 0.084(6) Uani 0.5 1 d D U P A 1
C67A C 0.6411(8) 1.0705(15) 0.8651(11) 0.091(5) Uani 0.5 1 d D U P A 1
C68A C 0.6527(11) 1.150(2) 0.8473(16) 0.129(6) Uani 0.5 1 d D U P A 1
C69A C 0.8447(9) 1.1223(17) 0.7454(14) 0.107(6) Uani 0.5 1 d D U P A 1
C70A C 0.8068(13) 1.169(2) 0.7940(14) 0.120(7) Uani 0.5 1 d D U P A 1
C71A C 0.8071(11) 1.1245(19) 0.8361(14) 0.113(7) Uani 0.5 1 d D U P A 1
C72A C 0.8656(5) 1.0280(17) 0.7385(10) 0.108(3) Uani 0.5 1 d D U P A 1
C73A C 0.7135(10) 1.232(2) 0.7981(14) 0.097(7) Uani 0.5 1 d D U P A 1
C74A C 0.7707(9) 1.1923(19) 0.5843(14) 0.118(7) Uani 0.5 1 d D U P A 1
C75A C 0.7659(13) 1.224(3) 0.7707(15) 0.099(7) Uani 0.5 1 d D U P A 1
C76A C 0.7030(9) 1.268(2) 0.6788(12) 0.082(6) Uani 0.5 1 d D U P A 1
C77A C 0.5738(10) 1.1282(18) 0.7589(18) 0.098(6) Uani 0.5 1 d D U P A 1
C78A C 0.6159(12) 1.187(3) 0.7923(16) 0.110(7) Uani 0.5 1 d D U P A 1
C79A C 0.7052(11) 1.1816(18) 0.8530(17) 0.101(6) Uani 0.5 1 d D U P A 1
C80A C 0.7889(9) 1.1176(16) 0.5381(12) 0.127(6) Uani 0.5 1 d D U P A 1
C81A C 0.6778(10) 1.268(2) 0.7422(15) 0.113(6) Uani 0.5 1 d D U P A 1
C82A C 0.6275(10) 1.246(2) 0.7386(18) 0.114(7) Uani 0.5 1 d D U P A 1
Ni1P Ni 0.51898(5) 1.0000 0.91810(7) 0.0297(4) Uani 1 2 d S T P G 1
N1P N 0.52045(17) 0.8689(3) 0.9164(2) 0.0308(11) Uani 1 1 d . . . G 1
N2P N 0.5762(2) 1.0000 0.9901(3) 0.0309(15) Uani 1 2 d S T P G 1
N3P N 0.4641(2) 1.0000 0.8433(3) 0.0306(15) Uani 1 2 d S T P G 1
C01P C 0.5426(2) 0.7208(4) 0.9391(3) 0.0387(14) Uani 1 1 d . . . G 1
C02P C 0.5524(2) 0.8124(4) 0.9555(3) 0.0319(13) Uani 1 1 d . . . G 1
C03P C 0.5903(2) 0.8407(4) 1.0043(3) 0.0324(13) Uani 1 1 d . . . G 1
H03P H 0.6099 0.7962 1.0292 0.039 Uiso 1 1 calc R U . G 1
C04P C 0.6016(2) 0.9271(4) 1.0195(3) 0.0300(12) Uani 1 1 d . . . G 1
C05P C 0.6438(2) 0.9559(4) 1.0678(3) 0.0319(13) Uani 1 1 d . . . G 1
C06P C 0.5036(2) 1.2793(5) 0.8872(3) 0.0384(14) Uani 1 1 d . . . G 1
C07P C 0.4901(2) 1.1875(4) 0.8749(3) 0.0316(13) Uani 1 1 d . . . G 1
C08P C 0.4527(2) 1.1598(4) 0.8252(3) 0.0360(14) Uani 1 1 d . . . G 1
H08P H 0.4337 1.2043 0.7997 0.043 Uiso 1 1 calc R U . G 1
C09P C 0.4414(2) 1.0729(4) 0.8103(3) 0.0320(13) Uani 1 1 d . . . G 1
C10P C 0.4054(2) 1.0447(5) 0.7545(3) 0.0388(14) Uani 1 1 d . . . G 1
C11P C 0.5720(3) 0.6436(4) 0.9713(4) 0.0466(17) Uani 1 1 d . . . G 1
H11A H 0.5514 0.5885 0.9619 0.056 Uiso 1 1 calc R U . G 1
H11B H 0.5753 0.6525 1.0208 0.056 Uiso 1 1 calc R U . G 1
C12P C 0.6819(2) 0.8921(5) 1.1045(3) 0.0417(16) Uani 1 1 d . . . G 1
H12A H 0.6622 0.8390 1.1185 0.050 Uiso 1 1 calc R U . G 1
H12B H 0.6978 0.9213 1.1457 0.050 Uiso 1 1 calc R U . G 1
C13P C 0.4798(3) 1.3560(4) 0.8475(4) 0.0471(17) Uani 1 1 d . . . G 1
H13A H 0.4864 1.4116 0.8735 0.056 Uiso 1 1 calc R U . G 1
H13B H 0.4410 1.3475 0.8412 0.056 Uiso 1 1 calc R U . G 1
C14P C 0.3769(2) 1.1080(5) 0.7061(3) 0.0459(17) Uani 1 1 d . . . G 1
H14A H 0.3617 1.1570 0.7320 0.055 Uiso 1 1 calc R U . G 1
H14B H 0.3472 1.0762 0.6815 0.055 Uiso 1 1 calc R U . G 1
C15P C 0.6271(3) 0.6323(5) 0.9460(4) 0.058(2) Uani 1 1 d . . . G 1
H15A H 0.6447 0.5812 0.9685 0.088 Uiso 1 1 calc R U . G 1
H15B H 0.6241 0.6223 0.8971 0.088 Uiso 1 1 calc R U . G 1
H15C H 0.6480 0.6863 0.9560 0.088 Uiso 1 1 calc R U . G 1
C16P C 0.7257(3) 0.8627(6) 1.0607(4) 0.0524(19) Uani 1 1 d . . . G 1
H16A H 0.7495 0.8215 1.0863 0.079 Uiso 1 1 calc R U . G 1
H16B H 0.7102 0.8327 1.0203 0.079 Uiso 1 1 calc R U . G 1
H16C H 0.7458 0.9149 1.0475 0.079 Uiso 1 1 calc R U . G 1
C17P C 0.5021(3) 1.3657(5) 0.7788(4) 0.056(2) Uani 1 1 d . . . G 1
H17A H 0.4854 1.4166 0.7549 0.084 Uiso 1 1 calc R U . G 1
H17B H 0.5404 1.3755 0.7847 0.084 Uiso 1 1 calc R U . G 1
H17C H 0.4950 1.3113 0.7524 0.084 Uiso 1 1 calc R U . G 1
C18P C 0.4130(3) 1.1479(6) 0.6547(4) 0.056(2) Uani 1 1 d . . . G 1
H18A H 0.3925 1.1885 0.6245 0.084 Uiso 1 1 calc R U . G 1
H18B H 0.4420 1.1806 0.6787 0.084 Uiso 1 1 calc R U . G 1
H18C H 0.4276 1.0998 0.6282 0.084 Uiso 1 1 calc R U . G 1
C01S C 0.6945(4) 0.5000 0.7860(5) 0.054(3) Uani 1 2 d S T P H 1
H01S H 0.7059 0.5000 0.8326 0.064 Uiso 1 2 calc R U P H 1
C02S C 0.6408(4) 0.5000 0.7665(6) 0.060(3) Uani 1 2 d S T P H 1
H02S H 0.6154 0.5000 0.7995 0.072 Uiso 1 2 calc R U P H 1
C03S C 0.6250(5) 0.5000 0.7001(6) 0.080(4) Uani 1 2 d S T P H 1
H03S H 0.5884 0.5000 0.6863 0.097 Uiso 1 2 calc R U P H 1
C04S C 0.6620(5) 0.5000 0.6522(6) 0.078(4) Uani 1 2 d S T P H 1
H04S H 0.6509 0.5000 0.6055 0.094 Uiso 1 2 calc R U P H 1
C05S C 0.7141(4) 0.5000 0.6722(6) 0.062(3) Uani 1 2 d S T P H 1
H05S H 0.7395 0.5000 0.6392 0.074 Uiso 1 2 calc R U P H 1
C06S C 0.7308(4) 0.5000 0.7385(5) 0.050(2) Uani 1 2 d S T P H 1
H06S H 0.7676 0.5000 0.7518 0.060 Uiso 1 2 calc R U P H 1
C07S C 0.5245(5) 0.6120(14) 0.5734(10) 0.084(8) Uani 0.5 1 d G . P I -1
H07S H 0.5419 0.5987 0.6161 0.101 Uiso 0.5 1 calc R U P I -1
C09S C 0.5512(5) 0.6014(13) 0.5151(11) 0.099(9) Uani 0.5 1 d G . P I -1
H09S H 0.5867 0.5808 0.5180 0.118 Uiso 0.5 1 calc R U P I -1
C08S C 0.5258(8) 0.6209(17) 0.4525(10) 0.115(13) Uani 0.5 1 d G . P I -1
H08S H 0.5441 0.6136 0.4126 0.138 Uiso 0.5 1 calc R U P I -1
C10S C 0.4738(9) 0.6510(17) 0.4482(8) 0.135(17) Uani 0.5 1 d G . P I -1
H10S H 0.4565 0.6643 0.4054 0.162 Uiso 0.5 1 calc R U P I -1
C11S C 0.4472(7) 0.6616(15) 0.5065(9) 0.131(14) Uani 0.5 1 d G . P I -1
H11S H 0.4116 0.6822 0.5036 0.157 Uiso 0.5 1 calc R U P I -1
C12S C 0.4725(6) 0.6421(16) 0.5691(8) 0.095(10) Uani 0.5 1 d G . P I -1
H12S H 0.4543 0.6494 0.6090 0.114 Uiso 0.5 1 calc R U P I -1
 
loop_
 _atom_site_aniso_label
 _atom_site_aniso_U_11
 _atom_site_aniso_U_22
 _atom_site_aniso_U_33
 _atom_site_aniso_U_23
 _atom_site_aniso_U_13
 _atom_site_aniso_U_12
Tb1 0.0260(14) 0.0370(10) 0.032(2) 0.0054(12) -0.0035(12) -0.0048(9)
N1 0.084(12) 0.31(4) 0.160(19) 0.000 -0.001(12) 0.000
C83 0.080(14) 0.38(5) 0.100(15) 0.000 -0.008(12) 0.000
Tb2 0.0260(14) 0.0370(10) 0.032(2) 0.0054(12) -0.0035(12) -0.0048(9)
Tb3 0.0260(14) 0.0370(10) 0.032(2) 0.0054(12) -0.0035(12) -0.0048(9)
Tb4 0.0260(14) 0.0370(10) 0.032(2) 0.0054(12) -0.0035(12) -0.0048(9)
Tb6 0.0260(14) 0.0370(10) 0.032(2) 0.0054(12) -0.0035(12) -0.0048(9)
C01A 0.080(10) 0.089(11) 0.071(9) -0.030(9) -0.015(9) -0.020(9)
C02A 0.045(8) 0.075(10) 0.069(9) -0.017(8) -0.004(7) 0.002(8)
C03A 0.046(9) 0.059(9) 0.074(10) -0.027(9) -0.015(8) -0.003(8)
C04A 0.082(12) 0.060(9) 0.084(10) -0.030(9) -0.027(9) -0.007(9)
C05A 0.100(12) 0.081(12) 0.091(11) -0.042(10) -0.038(10) 0.023(10)
C06A 0.122(13) 0.074(12) 0.095(12) -0.036(11) 0.002(11) 0.041(11)
C07A 0.115(12) 0.065(10) 0.091(11) -0.019(9) 0.002(10) 0.044(10)
C08A 0.087(11) 0.051(9) 0.091(11) -0.009(10) -0.005(10) 0.027(9)
C09A 0.078(10) 0.034(7) 0.081(10) 0.003(7) -0.020(8) 0.004(8)
C10A 0.114(11) 0.044(8) 0.049(8) 0.018(7) 0.006(8) -0.024(8)
C11A 0.087(10) 0.087(10) 0.055(8) -0.016(8) 0.032(8) -0.052(9)
C12A 0.047(8) 0.092(10) 0.056(8) -0.029(9) 0.007(7) -0.041(8)
C13A 0.045(8) 0.119(11) 0.108(10) -0.018(10) 0.019(8) 0.014(8)
C14A 0.030(5) 0.136(10) 0.097(8) 0.000 0.016(6) 0.000
C15A 0.052(8) 0.086(10) 0.086(9) -0.010(9) -0.027(8) 0.002(8)
C16A 0.051(6) 0.163(11) 0.064(7) 0.000 0.023(6) 0.000
C17A 0.062(8) 0.097(10) 0.033(7) -0.015(7) 0.018(6) -0.042(8)
C18A 0.064(8) 0.029(6) 0.021(5) 0.008(5) 0.000(6) 0.006(6)
C19A 0.108(10) 0.040(7) 0.019(6) 0.011(6) -0.002(7) 0.032(8)
C20A 0.119(11) 0.042(8) 0.035(7) 0.007(6) 0.008(8) 0.036(8)
C21A 0.105(12) 0.064(9) 0.085(10) 0.000(9) -0.007(10) 0.051(9)
C22A 0.078(11) 0.065(10) 0.065(8) 0.012(8) -0.034(8) 0.029(10)
C23A 0.035(8) 0.077(10) 0.069(10) 0.015(8) -0.029(7) 0.004(8)
C24A 0.066(10) 0.086(11) 0.044(8) 0.004(8) -0.034(8) 0.018(9)
C25A 0.080(8) 0.146(11) 0.056(7) 0.000 -0.037(6) 0.000
C26A 0.076(7) 0.101(9) 0.035(5) 0.000 0.007(5) 0.000
C27A 0.078(9) 0.081(10) 0.091(10) -0.001(9) 0.005(9) 0.053(8)
C28A 0.095(11) 0.074(11) 0.088(10) -0.008(9) 0.016(10) 0.053(9)
C29A 0.070(10) 0.115(11) 0.062(8) -0.019(9) -0.003(8) 0.059(9)
C30A 0.123(12) 0.122(13) 0.096(12) -0.033(11) 0.004(11) 0.035(12)
C31A 0.039(8) 0.125(12) 0.119(11) 0.026(10) -0.030(9) 0.038(9)
C32A 0.024(3) 0.173(8) 0.124(6) 0.000 -0.011(4) 0.000
C33A 0.046(9) 0.099(11) 0.085(10) 0.035(9) 0.026(9) 0.048(8)
C34A 0.062(10) 0.146(12) 0.102(10) 0.048(10) 0.033(9) 0.039(10)
C35A 0.080(6) 0.157(8) 0.080(6) -0.005(6) 0.050(5) 0.035(6)
C36A 0.088(10) 0.112(12) 0.079(10) -0.016(10) -0.003(9) 0.028(10)
C37A 0.088(11) 0.151(13) 0.052(10) -0.031(10) -0.021(9) -0.004(11)
C38A 0.081(10) 0.128(12) 0.060(9) -0.019(10) -0.008(9) -0.027(10)
C39A 0.080(6) 0.157(8) 0.080(6) -0.005(6) 0.050(5) 0.035(6)
C40A 0.080(6) 0.157(8) 0.080(6) -0.005(6) 0.050(5) 0.035(6)
C41A 0.088(10) 0.137(13) 0.071(9) 0.004(9) -0.032(9) -0.029(9)
C42A 0.024(3) 0.173(8) 0.124(6) 0.000 -0.011(4) 0.000
C43A 0.088(11) 0.184(14) 0.130(13) 0.030(12) 0.052(11) 0.018(11)
C44A 0.135(11) 0.183(13) 0.075(8) 0.000 0.027(9) 0.000
C45A 0.115(12) 0.155(13) 0.044(7) -0.026(9) -0.015(9) -0.027(10)
C46A 0.070(8) 0.102(10) 0.042(6) -0.010(7) -0.016(7) 0.000(8)
C47A 0.042(7) 0.139(13) 0.081(8) 0.010(9) -0.031(7) -0.023(8)
C48A 0.078(11) 0.094(13) 0.162(14) 0.018(12) 0.006(12) -0.030(10)
C49A 0.082(8) 0.102(10) 0.085(9) 0.000 -0.049(7) 0.000
C50A 0.082(10) 0.081(10) 0.104(10) 0.027(9) -0.061(9) -0.003(9)
C51A 0.047(8) 0.086(11) 0.112(12) 0.010(10) -0.031(9) 0.007(9)
C52A 0.035(5) 0.103(9) 0.116(9) 0.000 -0.026(6) 0.000
C53A 0.095(12) 0.106(12) 0.088(11) 0.025(11) -0.045(10) -0.017(10)
C54A 0.128(13) 0.145(13) 0.070(12) 0.030(11) -0.025(11) -0.048(11)
C55A 0.126(11) 0.169(13) 0.056(7) 0.000 -0.031(9) 0.000
C56A 0.070(10) 0.087(13) 0.098(12) 0.005(11) -0.012(10) -0.002(10)
C57A 0.068(11) 0.092(12) 0.130(13) -0.017(12) -0.006(10) 0.017(10)
C58A 0.054(9) 0.076(12) 0.125(14) -0.020(12) 0.025(11) 0.022(9)
C59A 0.084(10) 0.087(12) 0.087(11) 0.005(10) -0.007(10) -0.028(9)
C60A 0.103(11) 0.111(12) 0.074(10) 0.006(10) 0.029(10) -0.052(11)
C61A 0.141(13) 0.147(14) 0.074(11) 0.019(11) 0.002(11) -0.078(11)
C62A 0.116(12) 0.149(13) 0.054(8) 0.023(10) 0.011(10) -0.063(11)
C63A 0.038(8) 0.096(12) 0.171(14) 0.023(12) 0.007(11) -0.026(9)
C64A 0.062(9) 0.063(9) 0.120(12) -0.025(9) -0.025(9) -0.018(8)
C65A 0.031(8) 0.166(13) 0.136(13) 0.020(12) 0.032(9) 0.000(10)
C66A 0.095(13) 0.081(12) 0.070(11) -0.010(9) -0.035(12) -0.020(12)
C67A 0.102(11) 0.114(12) 0.065(10) -0.011(9) 0.056(9) 0.005(10)
C68A 0.132(12) 0.140(13) 0.118(12) -0.019(12) 0.036(11) 0.010(12)
C69A 0.052(9) 0.132(12) 0.134(13) 0.009(12) -0.004(11) -0.061(9)
C70A 0.100(12) 0.117(13) 0.135(14) -0.011(12) -0.053(11) -0.057(11)
C71A 0.112(12) 0.120(13) 0.099(12) 0.003(11) -0.057(11) -0.051(11)
C72A 0.024(3) 0.173(8) 0.124(6) 0.000 -0.011(4) 0.000
C73A 0.072(11) 0.104(14) 0.114(13) -0.045(11) -0.003(11) -0.003(11)
C74A 0.110(13) 0.122(13) 0.127(13) 0.027(12) 0.040(12) -0.037(12)
C75A 0.077(12) 0.086(12) 0.129(13) -0.028(12) -0.038(12) -0.022(11)
C76A 0.069(10) 0.071(11) 0.101(12) -0.016(11) -0.031(10) 0.012(9)
C77A 0.057(10) 0.103(12) 0.138(13) -0.036(12) 0.028(11) 0.022(10)
C78A 0.081(12) 0.109(14) 0.141(14) -0.032(13) 0.026(11) 0.012(11)
C79A 0.099(11) 0.107(13) 0.095(12) -0.035(11) -0.014(11) 0.002(11)
C80A 0.106(12) 0.165(14) 0.116(12) 0.044(12) 0.044(11) -0.038(12)
C81A 0.085(11) 0.104(12) 0.147(13) -0.040(12) -0.010(11) 0.025(11)
C82A 0.082(11) 0.113(13) 0.147(14) -0.034(12) -0.007(11) 0.032(11)
Ni1P 0.0229(7) 0.0279(8) 0.0365(8) 0.000 -0.0103(5) 0.000
N1P 0.025(2) 0.029(3) 0.037(3) -0.002(2) -0.0049(19) -0.0015(19)
N2P 0.021(3) 0.030(4) 0.041(4) 0.000 -0.006(3) 0.000
N3P 0.017(3) 0.039(4) 0.035(3) 0.000 -0.002(3) 0.000
C01P 0.036(3) 0.033(3) 0.046(3) 0.006(3) -0.001(3) 0.003(3)
C02P 0.028(3) 0.028(3) 0.039(3) 0.002(3) -0.001(2) -0.002(2)
C03P 0.024(3) 0.035(3) 0.038(3) 0.004(3) -0.001(2) 0.005(2)
C04P 0.019(3) 0.032(3) 0.038(3) 0.001(3) -0.004(2) 0.002(2)
C05P 0.021(3) 0.042(3) 0.032(3) 0.003(3) -0.006(2) 0.000(2)
C06P 0.029(3) 0.040(4) 0.045(3) 0.005(3) -0.002(3) -0.001(3)
C07P 0.024(3) 0.028(3) 0.041(3) 0.005(3) -0.004(2) 0.000(2)
C08P 0.022(3) 0.040(4) 0.044(3) 0.005(3) -0.005(2) 0.007(2)
C09P 0.024(3) 0.030(3) 0.040(3) 0.003(3) -0.007(2) 0.003(2)
C10P 0.027(3) 0.053(4) 0.035(3) 0.003(3) -0.009(2) 0.004(3)
C11P 0.050(4) 0.027(3) 0.061(4) 0.003(3) -0.008(3) -0.001(3)
C12P 0.033(3) 0.052(4) 0.039(3) 0.005(3) -0.012(3) 0.002(3)
C13P 0.043(4) 0.027(3) 0.069(5) 0.003(3) -0.009(3) 0.003(3)
C14P 0.032(3) 0.059(4) 0.044(4) 0.006(3) -0.013(3) 0.004(3)
C15P 0.053(4) 0.044(4) 0.078(5) 0.005(4) -0.001(4) 0.018(3)
C16P 0.036(3) 0.072(5) 0.048(4) 0.008(4) -0.003(3) 0.021(3)
C17P 0.045(4) 0.046(4) 0.075(5) 0.019(4) -0.011(4) -0.002(3)
C18P 0.051(4) 0.071(5) 0.044(4) 0.013(4) -0.017(3) 0.007(4)
C01S 0.047(6) 0.067(7) 0.046(5) 0.000 -0.003(5) 0.000
C02S 0.045(6) 0.075(8) 0.058(6) 0.000 0.005(5) 0.000
C03S 0.049(7) 0.127(13) 0.062(7) 0.000 -0.019(6) 0.000
C04S 0.069(8) 0.128(13) 0.035(5) 0.000 -0.011(6) 0.000
C05S 0.053(6) 0.085(9) 0.047(6) 0.000 0.006(5) 0.000
C06S 0.041(5) 0.065(7) 0.044(5) 0.000 0.003(4) 0.000
C07S 0.022(8) 0.095(19) 0.13(2) 0.007(15) -0.002(10) -0.002(9)
C09S 0.017(8) 0.13(2) 0.15(2) -0.049(19) 0.007(11) -0.023(10)
C08S 0.09(2) 0.10(2) 0.16(3) -0.06(2) 0.08(2) -0.006(18)
C10S 0.17(3) 0.15(3) 0.093(19) 0.05(2) 0.04(2) 0.11(3)
C11S 0.14(2) 0.13(3) 0.12(2) 0.06(2) 0.038(19) 0.10(2)
C12S 0.070(17) 0.11(2) 0.110(19) 0.011(17) 0.014(13) 0.022(15)
 
_geom_special_details
;
 All esds (except the esd in the dihedral angle between two l.s. planes)
 are estimated using the full covariance matrix.  The cell esds are taken
 into account individually in the estimation of esds in distances, angles
 and torsion angles; correlations between esds in cell parameters are only
 used when they are defined by crystal symmetry.  An approximate (isotropic)
 treatment of cell esds is used for estimating esds involving l.s. planes.
;
 
loop_
 _geom_bond_atom_site_label_1
 _geom_bond_atom_site_label_2
 _geom_bond_distance
 _geom_bond_site_symmetry_2
 _geom_bond_publ_flag
Tb1 C83 2.106(19) . ?
Tb1 N1 2.215(16) . ?
Tb1 C11A 2.32(2) . ?
Tb1 C10A 2.395(17) . ?
Tb1 C78A 2.40(3) 6_575 ?
Tb1 C77A 2.50(2) 6_575 ?
Tb1 C09A 2.538(19) . ?
Tb1 C82A 2.56(3) 6_575 ?
Tb1 C12A 2.606(18) . ?
Tb1 C17A 2.614(16) . ?
Tb1 Tb1 2.653(5) 6_575 ?
Tb1 C68A 2.69(3) 6_575 ?
N1 C83 1.02(3) . ?
N1 Tb1 2.215(16) 6_575 ?
C83 Tb1 2.106(19) 6_575 ?
Tb2 Tb2 3.181(12) 6_575 ?
Tb3 Tb3 2.86(3) 6_575 ?
Tb4 Tb4 2.81(6) 6_575 ?
Tb5 Tb5 2.76(13) 6_575 ?
C01A C53A 0.71(3) 6_575 ?
C01A C05A 1.36(3) . ?
C01A C50A 1.38(3) 6_575 ?
C01A C38A 1.40(3) . ?
C01A C02A 1.42(3) . ?
C01A C56A 1.44(4) 6_575 ?
C02A C51A 0.73(2) 6_575 ?
C02A C50A 1.18(3) 6_575 ?
C02A C15A 1.36(3) . ?
C02A C03A 1.36(3) . ?
C03A C58A 0.48(4) 6_575 ?
C03A C57A 1.24(5) 6_575 ?
C03A C51A 1.32(4) 6_575 ?
C03A C04A 1.47(3) . ?
C03A C12A 1.51(3) . ?
C04A C57A 0.45(4) 6_575 ?
C04A C56A 1.18(4) 6_575 ?
C04A C09A 1.33(3) . ?
C04A C05A 1.39(3) . ?
C04A C82A 1.59(5) 6_575 ?
C05A C56A 0.39(5) 6_575 ?
C05A C06A 1.33(4) . ?
C05A C59A 1.36(4) 6_575 ?
C05A C53A 1.37(4) 6_575 ?
C06A C59A 0.51(4) 6_575 ?
C06A C60A 1.02(4) 6_575 ?
C06A C30A 1.38(4) . ?
C06A C07A 1.52(4) . ?
C06A C56A 1.53(4) 6_575 ?
C07A C76A 0.76(3) 6_575 ?
C07A C59A 1.16(3) 6_575 ?
C07A C08A 1.30(3) . ?
C07A C64A 1.33(3) 6_575 ?
C07A C28A 1.47(4) . ?
C08A C76A 0.56(3) 6_575 ?
C08A C81A 0.91(3) 6_575 ?
C08A C09A 1.33(3) . ?
C08A C21A 1.54(3) . ?
C08A C64A 1.58(3) 6_575 ?
C09A C82A 0.75(3) 6_575 ?
C09A C81A 0.99(3) 6_575 ?
C09A C57A 1.39(4) 6_575 ?
C09A C10A 1.59(2) . ?
C09A C76A 1.63(3) 6_575 ?
C10A C78A 0.81(3) 6_575 ?
C10A C82A 1.07(4) 6_575 ?
C10A C20A 1.36(3) . ?
C10A C11A 1.51(4) . ?
C10A C81A 1.52(4) 6_575 ?
C10A C68A 1.59(4) 6_575 ?
C11A C78A 0.75(4) 6_575 ?
C11A C77A 0.99(3) 6_575 ?
C11A C17A 1.25(3) . ?
C11A C68A 1.61(4) 6_575 ?
C12A C77A 0.77(3) 6_575 ?
C12A C58A 1.07(4) 6_575 ?
C12A C13A 1.14(3) 6_575 ?
C12A C14A 1.69(3) . ?
C13A C12A 1.14(3) 6_575 ?
C13A C77A 1.22(3) . ?
C13A C14A 1.35(3) . ?
C13A C13A 1.46(5) 6_575 ?
C13A C16A 1.60(3) . ?
C13A Tb1 2.74(2) 6_575 ?
C14A C52A 1.25(2) . ?
C14A C13A 1.35(3) 6_575 ?
C14A C12A 1.69(3) 6_575 ?
C15A C51A 1.04(3) 6_575 ?
C15A C50A 1.23(3) 6_575 ?
C15A C52A 1.33(2) . ?
C15A C49A 1.45(2) . ?
C15A C15A 1.46(4) 6_575 ?
C16A C17A 1.46(2) 6_575 ?
C16A C17A 1.46(2) . ?
C16A C13A 1.60(3) 6_575 ?
C16A Tb1 3.009(12) 6_575 ?
C17A C67A 0.78(2) 6_575 ?
C17A C68A 1.26(4) 6_575 ?
C17A C18A 1.53(2) . ?
C18A C67A 0.87(2) 6_575 ?
C18A C68A 1.26(3) 6_575 ?
C18A C26A 1.357(13) . ?
C18A C19A 1.37(2) . ?
C19A C79A 0.70(3) 6_575 ?
C19A C66A 0.96(3) 6_575 ?
C19A C24A 1.50(3) . ?
C19A C20A 1.56(3) . ?
C19A C68A 1.59(4) 6_575 ?
C20A C73A 0.79(3) 6_575 ?
C20A C79A 0.90(3) 6_575 ?
C20A C21A 1.44(3) . ?
C20A C68A 1.49(4) 6_575 ?
C21A C73A 0.67(3) 6_575 ?
C21A C75A 1.07(4) 6_575 ?
C21A C22A 1.19(4) . ?
C21A C81A 1.38(4) 6_575 ?
C22A C75A 0.21(7) 6_575 ?
C22A C70A 1.27(5) 6_575 ?
C22A C23A 1.43(3) . ?
C22A C27A 1.55(3) . ?
C22A C73A 1.57(4) 6_575 ?
C22A C64A 1.59(3) 6_575 ?
C23A C71A 0.69(3) 6_575 ?
C23A C70A 0.73(3) 6_575 ?
C23A C24A 1.22(3) . ?
C23A C66A 1.47(4) 6_575 ?
C23A C75A 1.53(4) 6_575 ?
C24A C66A 0.56(3) 6_575 ?
C24A C71A 1.13(4) 6_575 ?
C24A C46A 1.46(3) 6_575 ?
C25A C46A 1.284(19) . ?
C25A C46A 1.284(19) 6_575 ?
C25A C47A 1.32(2) 6_575 ?
C25A C47A 1.32(2) . ?
C26A C18A 1.357(13) 6_575 ?
C26A C46A 1.47(2) 6_575 ?
C26A C46A 1.47(2) . ?
C27A C64A 1.16(3) 6_575 ?
C27A C28A 1.22(3) . ?
C27A C48A 1.23(3) 6_575 ?
C27A C33A 1.40(3) . ?
C27A C63A 1.52(3) 6_575 ?
C27A C75A 1.52(3) 6_575 ?
C28A C48A 0.59(3) 6_575 ?
C28A C64A 1.07(3) 6_575 ?
C28A C29A 1.46(3) . ?
C28A C74A 1.56(3) 6_575 ?
C29A C74A 0.59(3) 6_575 ?
C29A C48A 1.09(3) 6_575 ?
C29A C35A 1.35(3) . ?
C29A C36A 1.37(2) . ?
C29A C80A 1.53(3) 6_575 ?
C30A C61A 0.79(3) 6_575 ?
C30A C60A 0.81(3) 6_575 ?
C30A C36A 1.29(4) . ?
C30A C37A 1.43(4) . ?
C31A C69A 0.84(3) 6_575 ?
C31A C70A 1.33(4) 6_575 ?
C31A C71A 1.41(4) 6_575 ?
C31A C32A 1.57(3) . ?
C31A C72A 1.60(3) 6_575 ?
C31A C33A 1.60(3) . ?
C32A C47A 1.19(2) 6_575 ?
C32A C47A 1.19(2) . ?
C32A C72A 1.33(3) . ?
C32A C72A 1.33(3) 6_575 ?
C32A C31A 1.57(3) 6_575 ?
C33A C69A 0.79(3) 6_575 ?
C33A C63A 0.80(3) 6_575 ?
C33A C34A 1.48(3) . ?
C34A C65A 0.71(3) 6_575 ?
C34A C63A 1.01(3) 6_575 ?
C34A C35A 1.16(3) . ?
C34A C42A 1.57(3) . ?
C35A C65A 1.02(3) 6_575 ?
C35A C43A 1.16(3) 6_575 ?
C35A C80A 1.53(3) 6_575 ?
C35A C63A 1.55(3) 6_575 ?
C35A C39A 1.65(3) . ?
C36A C74A 0.97(3) 6_575 ?
C36A C80A 1.08(3) 6_575 ?
C36A C60A 1.29(3) 6_575 ?
C36A C62A 1.44(3) 6_575 ?
C36A C61A 1.54(3) 6_575 ?
C36A C40A 1.62(3) . ?
C37A C54A 0.63(3) 6_575 ?
C37A C61A 0.84(3) 6_575 ?
C37A C38A 1.29(3) . ?
C37A C45A 1.37(3) . ?
C38A C54A 0.84(3) 6_575 ?
C38A C53A 0.92(3) 6_575 ?
C38A C41A 1.39(3) . ?
C38A C50A 1.56(3) 6_575 ?
C39A C43A 0.56(3) 6_575 ?
C39A C39A 1.12(4) 6_575 ?
C39A C40A 1.33(3) . ?
C39A C80A 1.38(3) 6_575 ?
C39A C43A 1.43(3) . ?
C40A C62A 0.77(2) 6_575 ?
C40A C80A 1.04(3) 6_575 ?
C40A C44A 1.35(2) . ?
C41A C41A 1.20(5) 6_575 ?
C41A C49A 1.28(3) . ?
C41A C55A 1.31(2) . ?
C41A C50A 1.55(3) 6_575 ?
C41A C54A 1.61(3) 6_575 ?
C42A C65A 1.38(2) 6_575 ?
C42A C65A 1.38(2) . ?
C42A C72A 1.43(2) 6_575 ?
C42A C72A 1.43(2) . ?
C42A C34A 1.57(3) 6_575 ?
C43A C39A 0.56(3) 6_575 ?
C43A C35A 1.16(3) 6_575 ?
C43A C65A 1.33(3) . ?
C43A C80A 1.42(3) . ?
C43A C43A 1.54(5) 6_575 ?
C44A C62A 1.28(2) . ?
C44A C62A 1.28(2) 6_575 ?
C44A C40A 1.35(2) 6_575 ?
C44A C45A 1.56(3) . ?
C44A C45A 1.56(3) 6_575 ?
C45A C55A 1.14(2) . ?
C45A C45A 1.33(4) 6_575 ?
C45A C54A 1.49(3) 6_575 ?
C45A C61A 1.65(3) 6_575 ?
C45A C62A 1.67(3) 6_575 ?
C46A C46A 1.19(4) 6_575 ?
C46A C24A 1.46(3) 6_575 ?
C46A C66A 1.46(3) . ?
C47A C47A 0.75(5) 6_575 ?
C47A C71A 1.56(3) . ?
C48A C28A 0.59(3) 6_575 ?
C48A C29A 1.09(3) 6_575 ?
C48A C27A 1.23(3) 6_575 ?
C48A C63A 1.38(3) . ?
C48A C74A 1.40(4) . ?
C48A C64A 1.55(3) . ?
C49A C41A 1.28(3) 6_575 ?
C49A C15A 1.45(2) 6_575 ?
C49A C50A 1.45(2) 6_575 ?
C49A C50A 1.45(2) . ?
C50A C02A 1.18(3) 6_575 ?
C50A C15A 1.23(3) 6_575 ?
C50A C53A 1.28(3) . ?
C50A C01A 1.38(3) 6_575 ?
C50A C51A 1.45(3) . ?
C50A C41A 1.55(3) 6_575 ?
C50A C38A 1.56(3) 6_575 ?
C51A C02A 0.73(2) 6_575 ?
C51A C15A 1.04(3) 6_575 ?
C51A C03A 1.32(4) 6_575 ?
C51A C58A 1.52(4) . ?
C51A C52A 1.60(2) . ?
C52A C15A 1.33(2) 6_575 ?
C52A C51A 1.60(2) 6_575 ?
C53A C01A 0.71(3) 6_575 ?
C53A C38A 0.92(3) 6_575 ?
C53A C05A 1.37(4) 6_575 ?
C53A C54A 1.36(4) . ?
C53A C56A 1.62(4) . ?
C54A C37A 0.63(3) 6_575 ?
C54A C38A 0.84(3) 6_575 ?
C54A C61A 1.32(3) . ?
C54A C45A 1.49(3) 6_575 ?
C54A C41A 1.61(3) 6_575 ?
C55A C45A 1.14(2) 6_575 ?
C55A C41A 1.31(2) 6_575 ?
C56A C05A 0.39(5) 6_575 ?
C56A C04A 1.18(4) 6_575 ?
C56A C01A 1.44(4) 6_575 ?
C56A C59A 1.47(4) . ?
C56A C06A 1.53(4) 6_575 ?
C56A C57A 1.59(4) . ?
C57A C04A 0.45(4) 6_575 ?
C57A C03A 1.24(5) 6_575 ?
C57A C09A 1.39(4) 6_575 ?
C57A C82A 1.42(3) . ?
C57A C58A 1.43(3) . ?
C57A Tb1 2.76(4) 6_575 ?
C58A C03A 0.48(4) 6_575 ?
C58A C12A 1.07(4) 6_575 ?
C58A C77A 1.47(3) . ?
C58A Tb1 2.72(3) 6_575 ?
C59A C06A 0.51(4) 6_575 ?
C59A C07A 1.16(3) 6_575 ?
C59A C05A 1.36(4) 6_575 ?
C59A C60A 1.37(3) . ?
C59A C76A 1.41(3) . ?
C60A C06A 1.02(4) 6_575 ?
C60A C36A 1.29(3) 6_575 ?
C60A C74A 1.33(3) . ?
C60A C61A 1.57(3) . ?
C61A C30A 0.79(3) 6_575 ?
C61A C37A 0.84(3) 6_575 ?
C61A C62A 1.43(3) . ?
C61A C36A 1.54(3) 6_575 ?
C61A C45A 1.65(3) 6_575 ?
C62A C40A 0.77(2) 6_575 ?
C62A C80A 1.43(3) . ?
C62A C36A 1.44(3) 6_575 ?
C62A C45A 1.67(3) 6_575 ?
C63A C33A 0.80(3) 6_575 ?
C63A C34A 1.01(3) 6_575 ?
C63A C69A 1.52(3) . ?
C63A C27A 1.52(3) 6_575 ?
C63A C35A 1.55(3) 6_575 ?
C63A C65A 1.66(3) . ?
C64A C28A 1.07(3) 6_575 ?
C64A C27A 1.16(3) 6_575 ?
C64A C07A 1.33(3) 6_575 ?
C64A C75A 1.45(3) . ?
C64A C76A 1.45(3) . ?
C64A C08A 1.58(3) 6_575 ?
C64A C22A 1.59(3) 6_575 ?
C65A C34A 0.71(3) 6_575 ?
C65A C35A 1.02(3) 6_575 ?
C66A C24A 0.56(3) 6_575 ?
C66A C19A 0.96(3) 6_575 ?
C66A C79A 1.43(4) . ?
C66A C23A 1.47(4) 6_575 ?
C66A C71A 1.60(3) . ?
C67A C17A 0.78(2) 6_575 ?
C67A C18A 0.87(2) 6_575 ?
C67A C68A 1.28(4) . ?
C67A Tb1 2.95(2) 6_575 ?
C68A C17A 1.26(4) 6_575 ?
C68A C18A 1.26(3) 6_575 ?
C68A C79A 1.41(4) . ?
C68A C78A 1.49(4) . ?
C68A C20A 1.49(4) 6_575 ?
C68A C10A 1.59(4) 6_575 ?
C68A C11A 1.61(4) 6_575 ?
C68A C19A 1.59(4) 6_575 ?
C68A Tb1 2.69(3) 6_575 ?
C69A C33A 0.79(3) 6_575 ?
C69A C31A 0.84(3) 6_575 ?
C69A C72A 1.52(3) . ?
C69A C70A 1.57(4) . ?
C70A C23A 0.73(3) 6_575 ?
C70A C71A 1.07(4) . ?
C70A C22A 1.27(5) 6_575 ?
C70A C31A 1.33(4) 6_575 ?
C70A C75A 1.38(5) . ?
C71A C23A 0.69(3) 6_575 ?
C71A C24A 1.13(4) 6_575 ?
C71A C31A 1.41(4) 6_575 ?
C72A C72A 0.84(5) 6_575 ?
C72A C31A 1.60(3) 6_575 ?
C73A C21A 0.67(3) 6_575 ?
C73A C20A 0.79(3) 6_575 ?
C73A C79A 1.35(4) . ?
C73A C75A 1.47(3) . ?
C73A C81A 1.48(3) . ?
C73A C22A 1.57(4) 6_575 ?
C73A Tb1 2.88(3) 6_575 ?
C74A C29A 0.59(3) 6_575 ?
C74A C36A 0.97(3) 6_575 ?
C74A C80A 1.54(3) . ?
C74A C28A 1.56(3) 6_575 ?
C75A C22A 0.21(7) 6_575 ?
C75A C21A 1.07(4) 6_575 ?
C75A C27A 1.52(3) 6_575 ?
C75A C23A 1.53(4) 6_575 ?
C76A C08A 0.56(3) 6_575 ?
C76A C07A 0.76(3) 6_575 ?
C76A C81A 1.45(3) . ?
C76A C09A 1.63(3) 6_575 ?
C76A Tb1 3.03(4) 6_575 ?
C77A C12A 0.77(3) 6_575 ?
C77A C11A 0.99(3) 6_575 ?
C77A C78A 1.50(3) . ?
C77A Tb1 2.50(2) 6_575 ?
C78A C11A 0.75(4) 6_575 ?
C78A C10A 0.81(3) 6_575 ?
C78A C82A 1.44(4) . ?
C78A Tb1 2.40(3) 6_575 ?
C79A C19A 0.70(3) 6_575 ?
C79A C20A 0.90(3) 6_575 ?
C80A C40A 1.04(3) 6_575 ?
C80A C36A 1.08(3) 6_575 ?
C80A C39A 1.38(3) 6_575 ?
C80A C35A 1.53(3) 6_575 ?
C80A C29A 1.53(3) 6_575 ?
C81A C08A 0.91(3) 6_575 ?
C81A C09A 0.99(3) 6_575 ?
C81A C82A 1.31(4) . ?
C81A C21A 1.38(4) 6_575 ?
C81A C10A 1.52(4) 6_575 ?
C81A Tb1 2.75(3) 6_575 ?
C82A C09A 0.75(3) 6_575 ?
C82A C10A 1.07(4) 6_575 ?
C82A C04A 1.59(5) 6_575 ?
C82A Tb1 2.56(3) 6_575 ?
Ni1P N3P 1.963(6) . ?
Ni1P N2P 1.963(6) . ?
Ni1P N1P 1.969(5) 6_575 ?
Ni1P N1P 1.969(5) . ?
N1P C02P 1.374(7) . ?
N1P C07P 1.378(7) 6_575 ?
N2P C04P 1.379(7) 6_575 ?
N2P C04P 1.379(7) . ?
N3P C09P 1.381(7) 6_575 ?
N3P C09P 1.381(7) . ?
C01P C06P 1.378(8) 6_575 ?
C01P C02P 1.431(9) . ?
C01P C11P 1.497(9) . ?
C02P C03P 1.384(8) . ?
C03P C04P 1.358(9) . ?
C03P H03P 0.9500 . ?
C04P C05P 1.451(7) . ?
C05P C05P 1.325(13) 6_575 ?
C05P C12P 1.511(8) . ?
C06P C01P 1.378(8) 6_575 ?
C06P C07P 1.437(9) . ?
C06P C13P 1.498(9) . ?
C07P N1P 1.378(7) 6_575 ?
C07P C08P 1.384(8) . ?
C08P C09P 1.363(9) . ?
C08P H08P 0.9500 . ?
C09P C10P 1.449(8) . ?
C10P C10P 1.341(14) 6_575 ?
C10P C14P 1.501(9) . ?
C11P C15P 1.526(10) . ?
C11P H11A 0.9900 . ?
C11P H11B 0.9900 . ?
C12P C16P 1.523(10) . ?
C12P H12A 0.9900 . ?
C12P H12B 0.9900 . ?
C13P C17P 1.521(11) . ?
C13P H13A 0.9900 . ?
C13P H13B 0.9900 . ?
C14P C18P 1.540(11) . ?
C14P H14A 0.9900 . ?
C14P H14B 0.9900 . ?
C15P H15A 0.9800 . ?
C15P H15B 0.9800 . ?
C15P H15C 0.9800 . ?
C16P H16A 0.9800 . ?
C16P H16B 0.9800 . ?
C16P H16C 0.9800 . ?
C17P H17A 0.9800 . ?
C17P H17B 0.9800 . ?
C17P H17C 0.9800 . ?
C18P H18A 0.9800 . ?
C18P H18B 0.9800 . ?
C18P H18C 0.9800 . ?
C01S C06S 1.364(15) . ?
C01S C02S 1.386(15) . ?
C01S H01S 0.9500 . ?
C02S C03S 1.351(16) . ?
C02S H02S 0.9500 . ?
C03S C04S 1.380(18) . ?
C03S H03S 0.9500 . ?
C04S C05S 1.353(17) . ?
C04S H04S 0.9500 . ?
C05S C06S 1.354(15) . ?
C05S H05S 0.9500 . ?
C06S H06S 0.9500 . ?
C07S C09S 1.3900 . ?
C07S C12S 1.3900 . ?
C07S H07S 0.9500 . ?
C09S C08S 1.3900 . ?
C09S H09S 0.9500 . ?
C08S C10S 1.3900 . ?
C08S H08S 0.9500 . ?
C10S C11S 1.3900 . ?
C10S H10S 0.9500 . ?
C11S C12S 1.3900 . ?
C11S H11S 0.9500 . ?
C12S H12S 0.9500 . ?
 
loop_
 _geom_angle_atom_site_label_1
 _geom_angle_atom_site_label_2
 _geom_angle_atom_site_label_3
 _geom_angle
 _geom_angle_site_symmetry_1
 _geom_angle_site_symmetry_3
 _geom_angle_publ_flag
C83 Tb1 N1 27.2(7) . . ?
C83 Tb1 C11A 159.1(10) . . ?
N1 Tb1 C11A 153.9(8) . . ?
C83 Tb1 C10A 163.4(7) . . ?
N1 Tb1 C10A 144.5(8) . . ?
C11A Tb1 C10A 37.3(9) . . ?
C83 Tb1 C78A 175.8(10) . 6_575 ?
N1 Tb1 C78A 156.6(10) . 6_575 ?
C11A Tb1 C78A 18.1(9) . 6_575 ?
C10A Tb1 C78A 19.4(8) . 6_575 ?
C83 Tb1 C77A 140.4(10) . 6_575 ?
N1 Tb1 C77A 157.1(7) . 6_575 ?
C11A Tb1 C77A 23.4(8) . 6_575 ?
C10A Tb1 C77A 53.6(8) . 6_575 ?
C78A Tb1 C77A 35.6(8) 6_575 6_575 ?
C83 Tb1 C09A 130.2(6) . . ?
N1 Tb1 C09A 133.7(6) . . ?
C11A Tb1 C09A 65.9(8) . . ?
C10A Tb1 C09A 37.5(6) . . ?
C78A Tb1 C09A 50.0(10) 6_575 . ?
C77A Tb1 C09A 68.9(8) 6_575 . ?
C83 Tb1 C82A 146.3(10) . 6_575 ?
N1 Tb1 C82A 149.2(7) . 6_575 ?
C11A Tb1 C82A 48.9(9) . 6_575 ?
C10A Tb1 C82A 24.7(8) . 6_575 ?
C78A Tb1 C82A 33.4(8) 6_575 6_575 ?
C77A Tb1 C82A 53.7(9) 6_575 6_575 ?
C09A Tb1 C82A 17.0(8) . 6_575 ?
C83 Tb1 C12A 124.1(9) . . ?
N1 Tb1 C12A 146.3(7) . . ?
C11A Tb1 C12A 40.6(9) . . ?
C10A Tb1 C12A 68.4(8) . . ?
C78A Tb1 C12A 51.8(8) 6_575 . ?
C77A Tb1 C12A 17.3(7) 6_575 . ?
C09A Tb1 C12A 74.7(7) . . ?
C82A Tb1 C12A 62.4(8) 6_575 . ?
C83 Tb1 C17A 139.9(6) . . ?
N1 Tb1 C17A 125.3(7) . . ?
C11A Tb1 C17A 28.7(6) . . ?
C10A Tb1 C17A 54.0(7) . . ?
C78A Tb1 C17A 40.2(10) 6_575 . ?
C77A Tb1 C17A 45.6(9) 6_575 . ?
C09A Tb1 C17A 89.9(6) . . ?
C82A Tb1 C17A 73.6(9) 6_575 . ?
C12A Tb1 C17A 59.8(6) . . ?
C83 Tb1 Tb1 51.0(4) . 6_575 ?
N1 Tb1 Tb1 53.2(3) . 6_575 ?
C11A Tb1 Tb1 110.5(7) . 6_575 ?
C10A Tb1 Tb1 143.8(5) . 6_575 ?
C78A Tb1 Tb1 127.9(9) 6_575 6_575 ?
C77A Tb1 Tb1 103.9(6) 6_575 6_575 ?
C09A Tb1 Tb1 169.7(4) . 6_575 ?
C82A Tb1 Tb1 157.6(7) 6_575 6_575 ?
C12A Tb1 Tb1 96.4(6) . 6_575 ?
C17A Tb1 Tb1 89.8(4) . 6_575 ?
C83 Tb1 C68A 149.5(9) . 6_575 ?
N1 Tb1 C68A 123.7(9) . 6_575 ?
C11A Tb1 C68A 36.5(9) . 6_575 ?
C10A Tb1 C68A 36.0(8) . 6_575 ?
C78A Tb1 C68A 33.5(9) 6_575 6_575 ?
C77A Tb1 C68A 59.8(10) 6_575 6_575 ?
C09A Tb1 C68A 73.2(8) . 6_575 ?
C82A Tb1 C68A 60.3(10) 6_575 6_575 ?
C12A Tb1 C68A 76.9(8) . 6_575 ?
C17A Tb1 C68A 27.4(8) . 6_575 ?
Tb1 Tb1 C68A 110.1(7) 6_575 6_575 ?
C83 N1 Tb1 70.4(14) . . ?
C83 N1 Tb1 70.4(14) . 6_575 ?
Tb1 N1 Tb1 73.6(6) . 6_575 ?
N1 C83 Tb1 82.3(16) . . ?
N1 C83 Tb1 82.3(16) . 6_575 ?
Tb1 C83 Tb1 78.1(9) . 6_575 ?
C53A C01A C05A 75(3) 6_575 . ?
C53A C01A C50A 67(3) 6_575 6_575 ?
C05A C01A C50A 125(2) . 6_575 ?
C05A C01A C38A 102(2) . . ?
C50A C01A C38A 68.4(19) 6_575 . ?
C53A C01A C02A 106(4) 6_575 . ?
C05A C01A C02A 111.1(18) . . ?
C50A C01A C02A 49.7(15) 6_575 . ?
C38A C01A C02A 118(2) . . ?
C53A C01A C56A 91(3) 6_575 6_575 ?
C50A C01A C56A 134(2) 6_575 6_575 ?
C38A C01A C56A 116(2) . 6_575 ?
C02A C01A C56A 107(2) . 6_575 ?
C05A C01A C54A 82.8(18) . 6_575 ?
C50A C01A C54A 74.7(18) 6_575 6_575 ?
C02A C01A C54A 121.0(19) . 6_575 ?
C56A C01A C54A 97.5(17) 6_575 6_575 ?
C51A C02A C50A 96(3) 6_575 6_575 ?
C51A C02A C15A 50(2) 6_575 . ?
C50A C02A C15A 57.4(16) 6_575 . ?
C51A C02A C03A 71(3) 6_575 . ?
C50A C02A C03A 139(2) 6_575 . ?
C15A C02A C03A 121(2) . . ?
C51A C02A C01A 146(3) 6_575 . ?
C50A C02A C01A 63.6(17) 6_575 . ?
C15A C02A C01A 121(2) . . ?
C03A C02A C01A 105.6(16) . . ?
C51A C02A C58A 61(3) 6_575 6_575 ?
C50A C02A C58A 139(2) 6_575 6_575 ?
C15A C02A C58A 110.7(19) . 6_575 ?
C01A C02A C58A 116.3(18) . 6_575 ?
C51A C02A C53A 125(3) 6_575 6_575 ?
C50A C02A C53A 46.9(16) 6_575 6_575 ?
C15A C02A C53A 103.2(19) . 6_575 ?
C03A C02A C53A 108.1(16) . 6_575 ?
C58A C02A C53A 116.5(17) 6_575 6_575 ?
C58A C03A C57A 104(6) 6_575 6_575 ?
C58A C03A C51A 106(6) 6_575 6_575 ?
C57A C03A C51A 146(3) 6_575 6_575 ?
C58A C03A C02A 136(6) 6_575 . ?
C57A C03A C02A 120(2) 6_575 . ?
C58A C03A C04A 117(6) 6_575 . ?
C51A C03A C04A 129(2) 6_575 . ?
C02A C03A C04A 105.4(16) . . ?
C57A C03A C12A 117(2) 6_575 . ?
C51A C03A C12A 88.8(19) 6_575 . ?
C02A C03A C12A 120(2) . . ?
C04A C03A C12A 125.3(17) . . ?
C57A C03A C77A 95(2) 6_575 6_575 ?
C51A C03A C77A 110.0(19) 6_575 6_575 ?
C02A C03A C77A 142(2) . 6_575 ?
C04A C03A C77A 105.3(16) . 6_575 ?
C58A C03A Tb1 75(6) 6_575 . ?
C57A C03A Tb1 75(2) 6_575 . ?
C51A C03A Tb1 97.1(17) 6_575 . ?
C02A C03A Tb1 110.4(17) . . ?
C04A C03A Tb1 70.7(12) . . ?
C12A C03A Tb1 66.6(10) . . ?
C77A C03A Tb1 60.3(9) 6_575 . ?
C57A C04A C56A 152(8) 6_575 6_575 ?
C57A C04A C09A 87(7) 6_575 . ?
C56A C04A C09A 119(3) 6_575 . ?
C57A C04A C05A 156(7) 6_575 . ?
C09A C04A C05A 116.6(18) . . ?
C57A C04A C03A 51(7) 6_575 . ?
C56A C04A C03A 113(3) 6_575 . ?
C09A C04A C03A 124.7(18) . . ?
C05A C04A C03A 107.8(18) . . ?
C57A C04A C82A 59(6) 6_575 6_575 ?
C56A C04A C82A 147(3) 6_575 6_575 ?
C05A C04A C82A 143.2(19) . 6_575 ?
C03A C04A C82A 98.7(19) . 6_575 ?
C56A C04A C58A 127(3) 6_575 6_575 ?
C09A C04A C58A 110.6(19) . 6_575 ?
C05A C04A C58A 120(2) . 6_575 ?
C82A C04A C58A 85(2) 6_575 6_575 ?
C57A C04A Tb1 92(7) 6_575 . ?
C56A C04A Tb1 107(2) 6_575 . ?
C09A C04A Tb1 68.4(12) . . ?
C05A C04A Tb1 93.0(18) . . ?
C03A C04A Tb1 78.3(13) . . ?
C82A C04A Tb1 67.6(15) 6_575 . ?
C58A C04A Tb1 71.8(15) 6_575 . ?
C56A C05A C06A 113(9) 6_575 . ?
C56A C05A C59A 98(8) 6_575 6_575 ?
C56A C05A C53A 123(9) 6_575 6_575 ?
C06A C05A C53A 113(3) . 6_575 ?
C59A C05A C53A 134(3) 6_575 6_575 ?
C56A C05A C01A 93(8) 6_575 . ?
C06A C05A C01A 136(2) . . ?
C59A C05A C01A 156(3) 6_575 . ?
C56A C05A C04A 50(9) 6_575 . ?
C06A C05A C04A 123(2) . . ?
C59A C05A C04A 102(2) 6_575 . ?
C53A C05A C04A 120(2) 6_575 . ?
C01A C05A C04A 101.5(19) . . ?
C56A C05A C57A 50(9) 6_575 6_575 ?
C06A C05A C57A 129(2) . 6_575 ?
C59A C05A C57A 107(2) 6_575 6_575 ?
C53A C05A C57A 114(3) 6_575 6_575 ?
C01A C05A C57A 96(2) . 6_575 ?
C59A C06A C60A 124(8) 6_575 6_575 ?
C59A C06A C05A 83(6) 6_575 . ?
C60A C06A C05A 147(4) 6_575 . ?
C59A C06A C30A 159(8) 6_575 . ?
C05A C06A C30A 114(3) . . ?
C60A C06A C07A 86(3) 6_575 . ?
C05A C06A C07A 117(2) . . ?
C30A C06A C07A 121(3) . . ?
C59A C06A C56A 74(6) 6_575 6_575 ?
C60A C06A C56A 160(4) 6_575 6_575 ?
C30A C06A C56A 125(3) . 6_575 ?
C07A C06A C56A 111(2) . 6_575 ?
C60A C06A C76A 108(3) 6_575 6_575 ?
C05A C06A C76A 94.6(18) . 6_575 ?
C30A C06A C76A 141(3) . 6_575 ?
C56A C06A C76A 88(2) 6_575 6_575 ?
C76A C07A C59A 92(4) 6_575 6_575 ?
C59A C07A C08A 101(2) 6_575 . ?
C76A C07A C64A 83(3) 6_575 6_575 ?
C59A C07A C64A 162(3) 6_575 6_575 ?
C08A C07A C64A 73.9(18) . 6_575 ?
C76A C07A C28A 128(4) 6_575 . ?
C59A C07A C28A 135(3) 6_575 . ?
C08A C07A C28A 118(2) . . ?
C76A C07A C06A 107(3) 6_575 . ?
C08A C07A C06A 115.7(19) . . ?
C64A C07A C06A 156(3) 6_575 . ?
C28A C07A C06A 120(2) . . ?
C76A C07A C60A 140(4) 6_575 6_575 ?
C59A C07A C60A 50.9(18) 6_575 6_575 ?
C08A C07A C60A 147.7(18) . 6_575 ?
C64A C07A C60A 127(2) 6_575 6_575 ?
C28A C07A C60A 85.0(19) . 6_575 ?
C76A C07A C48A 132(3) 6_575 6_575 ?
C59A C07A C48A 127(3) 6_575 6_575 ?
C08A C07A C48A 123(2) . 6_575 ?
C64A C07A C48A 50.7(15) 6_575 6_575 ?
C06A C07A C48A 112(2) . 6_575 ?
C60A C07A C48A 77.5(15) 6_575 6_575 ?
C76A C08A C81A 160(6) 6_575 6_575 ?
C81A C08A C07A 167(4) 6_575 . ?
C76A C08A C09A 112(4) 6_575 . ?
C81A C08A C09A 48(2) 6_575 . ?
C07A C08A C09A 124.0(19) . . ?
C76A C08A C21A 132(5) 6_575 . ?
C81A C08A C21A 63(2) 6_575 . ?
C07A C08A C21A 119(2) . . ?
C09A C08A C21A 107.3(16) . . ?
C76A C08A C64A 67(4) 6_575 6_575 ?
C81A C08A C64A 128(3) 6_575 6_575 ?
C07A C08A C64A 54.0(16) . 6_575 ?
C09A C08A C64A 157(2) . 6_575 ?
C21A C08A C64A 66.1(16) . 6_575 ?
C81A C08A C59A 135(3) 6_575 6_575 ?
C09A C08A C59A 87.7(15) . 6_575 ?
C21A C08A C59A 149(2) . 6_575 ?
C64A C08A C59A 89.6(16) 6_575 6_575 ?
C76A C08A C73A 144(6) 6_575 6_575 ?
C81A C08A C73A 47(2) 6_575 6_575 ?
C07A C08A C73A 132(2) . 6_575 ?
C09A C08A C73A 89.7(14) . 6_575 ?
C64A C08A C73A 81.6(15) 6_575 6_575 ?
C59A C08A C73A 150(2) 6_575 6_575 ?
C76A C08A C82A 126(5) 6_575 6_575 ?
C07A C08A C82A 137.3(19) . 6_575 ?
C21A C08A C82A 93.5(16) . 6_575 ?
C64A C08A C82A 152(2) 6_575 6_575 ?
C59A C08A C82A 101.5(17) 6_575 6_575 ?
C73A C08A C82A 76.1(15) 6_575 6_575 ?
C76A C08A Tb1 96(6) 6_575 . ?
C81A C08A Tb1 71(3) 6_575 . ?
C07A C08A Tb1 97.2(17) . . ?
C09A C08A Tb1 60.5(12) . . ?
C21A C08A Tb1 80.8(13) . . ?
C64A C08A Tb1 96.7(15) 6_575 . ?
C59A C08A Tb1 83.8(14) 6_575 . ?
C73A C08A Tb1 69.4(12) 6_575 . ?
C82A C08A Tb1 59.7(11) 6_575 . ?
C82A C09A C81A 97(4) 6_575 6_575 ?
C82A C09A C08A 140(3) 6_575 . ?
C82A C09A C04A 96(3) 6_575 . ?
C81A C09A C04A 165(3) 6_575 . ?
C08A C09A C04A 123.2(18) . . ?
C82A C09A C57A 77(3) 6_575 6_575 ?
C81A C09A C57A 173(3) 6_575 6_575 ?
C08A C09A C57A 142(2) . 6_575 ?
C81A C09A C10A 67(2) 6_575 . ?
C08A C09A C10A 107.2(15) . . ?
C04A C09A C10A 121.3(16) . . ?
C57A C09A C10A 105.6(19) 6_575 . ?
C82A C09A C76A 158(4) 6_575 6_575 ?
C81A C09A C76A 62(2) 6_575 6_575 ?
C04A C09A C76A 104.6(16) . 6_575 ?
C57A C09A C76A 123.7(19) 6_575 6_575 ?
C10A C09A C76A 123.0(16) . 6_575 ?
C82A C09A Tb1 83(3) 6_575 . ?
C81A C09A Tb1 92(2) 6_575 . ?
C08A C09A Tb1 92.4(16) . . ?
C04A C09A Tb1 82.3(14) . . ?
C57A C09A Tb1 84.0(19) 6_575 . ?
C10A C09A Tb1 66.4(9) . . ?
C76A C09A Tb1 90.5(15) 6_575 . ?
C78A C10A C82A 99(4) 6_575 6_575 ?
C78A C10A C20A 128(3) 6_575 . ?
C82A C10A C20A 132(2) 6_575 . ?
C82A C10A C11A 103(2) 6_575 . ?
C20A C10A C11A 120.2(17) . . ?
C78A C10A C81A 154(3) 6_575 6_575 ?
C82A C10A C81A 58.0(19) 6_575 6_575 ?
C20A C10A C81A 73.8(16) . 6_575 ?
C11A C10A C81A 149.9(19) . 6_575 ?
C78A C10A C68A 68(3) 6_575 6_575 ?
C82A C10A C68A 164(3) 6_575 6_575 ?
C20A C10A C68A 60.0(15) . 6_575 ?
C11A C10A C68A 62.2(17) . 6_575 ?
C81A C10A C68A 132(2) 6_575 6_575 ?
C78A C10A C09A 118(3) 6_575 . ?
C20A C10A C09A 109.1(15) . . ?
C11A C10A C09A 117.3(16) . . ?
C68A C10A C09A 155.8(17) 6_575 . ?
C78A C10A C73A 148(4) 6_575 6_575 ?
C82A C10A C73A 109(2) 6_575 6_575 ?
C11A C10A C73A 136.7(19) . 6_575 ?
C81A C10A C73A 51.4(15) 6_575 6_575 ?
C68A C10A C73A 81.4(19) 6_575 6_575 ?
C09A C10A C73A 86.4(14) . 6_575 ?
C78A C10A Tb1 81(3) 6_575 . ?
C82A C10A Tb1 86(2) 6_575 . ?
C20A C10A Tb1 89.4(12) . . ?
C11A C10A Tb1 68.6(10) . . ?
C81A C10A Tb1 86.2(13) 6_575 . ?
C68A C10A Tb1 82.0(13) 6_575 . ?
C09A C10A Tb1 76.1(9) . . ?
C73A C10A Tb1 84.7(12) 6_575 . ?
C78A C11A C77A 118(4) 6_575 6_575 ?
C78A C11A C17A 118(5) 6_575 . ?
C77A C11A C17A 123(4) 6_575 . ?
C77A C11A C10A 122(3) 6_575 . ?
C17A C11A C10A 111(3) . . ?
C78A C11A C68A 68(4) 6_575 6_575 ?
C77A C11A C68A 170(3) 6_575 6_575 ?
C17A C11A C68A 50.3(17) . 6_575 ?
C10A C11A C68A 61.5(19) . 6_575 ?
C78A C11A C12A 119(4) 6_575 . ?
C17A C11A C12A 121(3) . . ?
C10A C11A C12A 120.4(16) . . ?
C68A C11A C12A 161.1(18) 6_575 . ?
C78A C11A C13A 156(4) 6_575 6_575 ?
C17A C11A C13A 83(2) . 6_575 ?
C10A C11A C13A 152.0(17) . 6_575 ?
C68A C11A C13A 132.0(19) 6_575 6_575 ?
C78A C11A C67A 108(4) 6_575 6_575 ?
C77A C11A C67A 133(3) 6_575 6_575 ?
C10A C11A C67A 100.7(19) . 6_575 ?
C12A C11A C67A 129.2(19) . 6_575 ?
C13A C11A C67A 92.8(15) 6_575 6_575 ?
C78A C11A Tb1 87(4) 6_575 . ?
C77A C11A Tb1 88(2) 6_575 . ?
C17A C11A Tb1 88.9(12) . . ?
C10A C11A Tb1 74.1(10) . . ?
C68A C11A Tb1 84.3(14) 6_575 . ?
C12A C11A Tb1 78.7(10) . . ?
C13A C11A Tb1 82.6(11) 6_575 . ?
C67A C11A Tb1 86.1(9) 6_575 . ?
C77A C12A C58A 105(4) 6_575 6_575 ?
C77A C12A C13A 77(3) 6_575 6_575 ?
C58A C12A C13A 168(3) 6_575 6_575 ?
C77A C12A C03A 111(4) 6_575 . ?
C13A C12A C03A 161(2) 6_575 . ?
C77A C12A C14A 129(3) 6_575 . ?
C58A C12A C14A 124(2) 6_575 . ?
C13A C12A C14A 52.6(18) 6_575 . ?
C03A C12A C14A 115.9(18) . . ?
C58A C12A C11A 105(2) 6_575 . ?
C13A C12A C11A 74.2(19) 6_575 . ?
C03A C12A C11A 109.4(19) . . ?
C14A C12A C11A 124.4(15) . . ?
C77A C12A C51A 151(4) 6_575 6_575 ?
C58A C12A C51A 49.4(18) 6_575 6_575 ?
C13A C12A C51A 125(2) 6_575 6_575 ?
C14A C12A C51A 74.4(13) . 6_575 ?
C11A C12A C51A 143.7(16) . 6_575 ?
C77A C12A Tb1 73(2) 6_575 . ?
C58A C12A Tb1 84.6(19) 6_575 . ?
C13A C12A Tb1 84.5(12) 6_575 . ?
C03A C12A Tb1 81.2(12) . . ?
C14A C12A Tb1 95.8(9) . . ?
C11A C12A Tb1 60.7(9) . . ?
C51A C12A Tb1 88.9(9) 6_575 . ?
C12A C13A C14A 85(2) 6_575 . ?
C77A C13A C14A 123(3) . . ?
C12A C13A C13A 140.8(19) 6_575 6_575 ?
C77A C13A C13A 167.9(14) . 6_575 ?
C14A C13A C13A 57.1(12) . 6_575 ?
C12A C13A C16A 148(2) 6_575 . ?
C77A C13A C16A 113(3) . . ?
C14A C13A C16A 118.8(19) . . ?
C13A C13A C16A 62.7(10) 6_575 . ?
C12A C13A C11A 68.2(19) 6_575 6_575 ?
C14A C13A C11A 148(2) . 6_575 ?
C13A C13A C11A 141.6(10) 6_575 6_575 ?
C16A C13A C11A 81.7(12) . 6_575 ?
C12A C13A Tb1 71.0(13) 6_575 6_575 ?
C77A C13A Tb1 65.4(14) . 6_575 ?
C14A C13A Tb1 99.4(12) . 6_575 ?
C13A C13A Tb1 102.5(5) 6_575 6_575 ?
C16A C13A Tb1 83.3(8) . 6_575 ?
C11A C13A Tb1 56.9(8) 6_575 6_575 ?
C52A C14A C13A 144.2(13) . 6_575 ?
C52A C14A C13A 144.2(13) . . ?
C13A C14A C13A 66(2) 6_575 . ?
C52A C14A C12A 102.8(9) . . ?
C13A C14A C12A 107.3(16) . . ?
C52A C14A C12A 102.8(9) . 6_575 ?
C13A C14A C12A 107.3(16) 6_575 6_575 ?
C12A C14A C12A 145.8(15) . 6_575 ?
C51A C15A C50A 79(2) 6_575 6_575 ?
C51A C15A C52A 83.5(19) 6_575 . ?
C50A C15A C52A 143.6(16) 6_575 . ?
C50A C15A C02A 53.9(15) 6_575 . ?
C52A C15A C02A 115.8(17) . . ?
C51A C15A C49A 139(2) 6_575 . ?
C50A C15A C49A 65.2(16) 6_575 . ?
C52A C15A C49A 113.9(15) . . ?
C02A C15A C49A 119.1(17) . . ?
C51A C15A C15A 136.3(17) 6_575 6_575 ?
C50A C15A C15A 121.3(16) 6_575 6_575 ?
C52A C15A C15A 56.9(9) . 6_575 ?
C02A C15A C15A 163.3(11) . 6_575 ?
C49A C15A C15A 59.8(8) . 6_575 ?
C17A C16A C17A 129.1(14) 6_575 . ?
C17A C16A C13A 85.0(11) 6_575 . ?
C17A C16A C13A 137.9(13) . . ?
C17A C16A C13A 137.9(13) 6_575 6_575 ?
C17A C16A C13A 85.0(11) . 6_575 ?
C13A C16A C13A 54.6(19) . 6_575 ?
C17A C16A C67A 103.1(13) . . ?
C13A C16A C67A 111.8(13) . . ?
C13A C16A C67A 160.0(13) 6_575 . ?
C17A C16A C67A 103.1(13) 6_575 6_575 ?
C13A C16A C67A 160.0(13) . 6_575 ?
C13A C16A C67A 111.8(13) 6_575 6_575 ?
C67A C16A C67A 76.5(17) . 6_575 ?
C17A C16A Tb1 60.3(8) 6_575 6_575 ?
C17A C16A Tb1 107.5(9) . 6_575 ?
C13A C16A Tb1 64.9(8) . 6_575 ?
C13A C16A Tb1 88.9(9) 6_575 6_575 ?
C67A C16A Tb1 71.3(8) . 6_575 ?
C67A C16A Tb1 103.0(8) 6_575 6_575 ?
C17A C16A Tb1 107.5(9) 6_575 . ?
C17A C16A Tb1 60.3(8) . . ?
C13A C16A Tb1 88.9(9) . . ?
C13A C16A Tb1 64.9(8) 6_575 . ?
C67A C16A Tb1 103.0(8) . . ?
C67A C16A Tb1 71.3(8) 6_575 . ?
Tb1 C16A Tb1 52.3(2) 6_575 . ?
C67A C17A C68A 74(3) 6_575 6_575 ?
C67A C17A C11A 153(4) 6_575 . ?
C68A C17A C11A 80(2) 6_575 . ?
C67A C17A C16A 95(3) 6_575 . ?
C68A C17A C16A 161.7(18) 6_575 . ?
C11A C17A C16A 110(2) . . ?
C68A C17A C18A 52.7(15) 6_575 . ?
C11A C17A C18A 130(2) . . ?
C16A C17A C18A 113.1(12) . . ?
C67A C17A C78A 131(3) 6_575 6_575 ?
C68A C17A C78A 57.2(18) 6_575 6_575 ?
C16A C17A C78A 131.4(15) . 6_575 ?
C18A C17A C78A 108.8(16) . 6_575 ?
C67A C17A C77A 172(2) 6_575 6_575 ?
C68A C17A C77A 103.9(19) 6_575 6_575 ?
C16A C17A C77A 85.2(12) . 6_575 ?
C18A C17A C77A 151.4(15) . 6_575 ?
C78A C17A C77A 47.0(13) 6_575 6_575 ?
C67A C17A Tb1 108(2) 6_575 . ?
C68A C17A Tb1 79.5(16) 6_575 . ?
C11A C17A Tb1 62.5(11) . . ?
C16A C17A Tb1 90.7(9) . . ?
C18A C17A Tb1 92.8(9) . . ?
C78A C17A Tb1 63.4(12) 6_575 . ?
C77A C17A Tb1 64.1(8) 6_575 . ?
C67A C18A C68A 71(2) 6_575 6_575 ?
C67A C18A C26A 97(2) 6_575 . ?
C68A C18A C26A 162.8(18) 6_575 . ?
C67A C18A C19A 144(2) 6_575 . ?
C68A C18A C19A 74.1(18) 6_575 . ?
C26A C18A C19A 113.4(15) . . ?
C68A C18A C17A 52.4(16) 6_575 . ?
C26A C18A C17A 114.0(12) . . ?
C19A C18A C17A 123.2(14) . . ?
C67A C18A C79A 123(2) 6_575 6_575 ?
C68A C18A C79A 52.5(17) 6_575 6_575 ?
C26A C18A C79A 134.6(14) . 6_575 ?
C17A C18A C79A 103.0(13) . 6_575 ?
C67A C18A C46A 145(2) 6_575 6_575 ?
C68A C18A C46A 135.5(18) 6_575 6_575 ?
C26A C18A C46A 50.7(9) . 6_575 ?
C19A C18A C46A 62.9(13) . 6_575 ?
C17A C18A C46A 152.5(11) . 6_575 ?
C79A C18A C46A 84.5(12) 6_575 6_575 ?
C79A C19A C66A 118(4) 6_575 6_575 ?
C79A C19A C18A 112(4) 6_575 . ?
C66A C19A C18A 129(2) 6_575 . ?
C79A C19A C24A 121(4) 6_575 . ?
C18A C19A C24A 125(2) . . ?
C66A C19A C20A 119(2) 6_575 . ?
C18A C19A C20A 105.5(18) . . ?
C24A C19A C20A 120.7(18) . . ?
C79A C19A C68A 62(3) 6_575 6_575 ?
C66A C19A C68A 166(3) 6_575 6_575 ?
C18A C19A C68A 49.8(15) . 6_575 ?
C24A C19A C68A 160.8(19) . 6_575 ?
C20A C19A C68A 56.6(16) . 6_575 ?
C79A C19A C46A 172(4) 6_575 6_575 ?
C66A C19A C46A 56.1(19) 6_575 6_575 ?
C18A C19A C46A 73.0(11) . 6_575 ?
C24A C19A C46A 52.6(15) . 6_575 ?
C20A C19A C46A 158.6(14) . 6_575 ?
C68A C19A C46A 121.7(17) 6_575 6_575 ?
C66A C19A C73A 97(2) 6_575 6_575 ?
C18A C19A C73A 125.3(17) . 6_575 ?
C24A C19A C73A 97.9(17) . 6_575 ?
C68A C19A C73A 78.5(17) 6_575 6_575 ?
C46A C19A C73A 143.9(16) 6_575 6_575 ?
C73A C20A C79A 107(4) 6_575 6_575 ?
C73A C20A C10A 115(3) 6_575 . ?
C79A C20A C10A 135(3) 6_575 . ?
C79A C20A C21A 115(3) 6_575 . ?
C10A C20A C21A 107.4(16) . . ?
C73A C20A C68A 160(4) 6_575 6_575 ?
C79A C20A C68A 67(2) 6_575 6_575 ?
C10A C20A C68A 67.9(17) . 6_575 ?
C21A C20A C68A 160(2) . 6_575 ?
C73A C20A C19A 107(4) 6_575 . ?
C10A C20A C19A 129.1(16) . . ?
C21A C20A C19A 114(2) . . ?
C68A C20A C19A 62.9(15) 6_575 . ?
C73A C20A C81A 59(3) 6_575 6_575 ?
C79A C20A C81A 164(3) 6_575 6_575 ?
C10A C20A C81A 57.2(13) . 6_575 ?
C21A C20A C81A 50.7(14) . 6_575 ?
C68A C20A C81A 124(2) 6_575 6_575 ?
C19A C20A C81A 156.6(18) . 6_575 ?
C73A C20A C78A 132(3) 6_575 6_575 ?
C79A C20A C78A 116(3) 6_575 6_575 ?
C21A C20A C78A 124.6(17) . 6_575 ?
C68A C20A C78A 49.0(16) 6_575 6_575 ?
C19A C20A C78A 110.5(16) . 6_575 ?
C81A C20A C78A 75.6(16) 6_575 6_575 ?
C73A C20A Tb1 92(3) 6_575 . ?
C79A C20A Tb1 104(2) 6_575 . ?
C10A C20A Tb1 60.9(9) . . ?
C21A C20A Tb1 88.8(12) . . ?
C68A C20A Tb1 72.0(14) 6_575 . ?
C19A C20A Tb1 91.7(9) . . ?
C81A C20A Tb1 71.9(12) 6_575 . ?
C78A C20A Tb1 58.7(11) 6_575 . ?
C73A C21A C75A 114(5) 6_575 6_575 ?
C73A C21A C22A 111(5) 6_575 . ?
C73A C21A C81A 85(4) 6_575 6_575 ?
C75A C21A C81A 148(3) 6_575 6_575 ?
C22A C21A C81A 156(3) . 6_575 ?
C75A C21A C20A 122(3) 6_575 . ?
C22A C21A C20A 120(3) . . ?
C81A C21A C20A 75.6(19) 6_575 . ?
C73A C21A C08A 118(4) 6_575 . ?
C75A C21A C08A 115(3) 6_575 . ?
C22A C21A C08A 121(3) . . ?
C20A C21A C08A 108.8(17) . . ?
C73A C21A C64A 154(5) 6_575 6_575 ?
C75A C21A C64A 58(2) 6_575 6_575 ?
C22A C21A C64A 63.7(18) . 6_575 ?
C81A C21A C64A 93.6(18) 6_575 6_575 ?
C20A C21A C64A 151.7(19) . 6_575 ?
C08A C21A C64A 58.0(14) . 6_575 ?
C73A C21A C76A 127(4) 6_575 6_575 ?
C75A C21A C76A 102(2) 6_575 6_575 ?
C22A C21A C76A 109(2) . 6_575 ?
C81A C21A C76A 47.6(14) 6_575 6_575 ?
C20A C21A C76A 118.0(17) . 6_575 ?
C64A C21A C76A 46.1(10) 6_575 6_575 ?
C75A C21A C79A 99(3) 6_575 6_575 ?
C22A C21A C79A 96(2) . 6_575 ?
C81A C21A C79A 99.5(19) 6_575 6_575 ?
C08A C21A C79A 131.0(16) . 6_575 ?
C64A C21A C79A 147(2) 6_575 6_575 ?
C76A C21A C79A 137.9(16) 6_575 6_575 ?
C75A C22A C21A 51(10) 6_575 . ?
C75A C22A C70A 118(10) 6_575 6_575 ?
C21A C22A C70A 150(4) . 6_575 ?
C75A C22A C23A 116(10) 6_575 . ?
C21A C22A C23A 122(3) . . ?
C75A C22A C27A 77(10) 6_575 . ?
C21A C22A C27A 117(2) . . ?
C70A C22A C27A 79(2) 6_575 . ?
C23A C22A C27A 108.8(19) . . ?
C75A C22A C73A 60(10) 6_575 6_575 ?
C70A C22A C73A 128(3) 6_575 6_575 ?
C23A C22A C73A 99(2) . 6_575 ?
C27A C22A C73A 136(2) . 6_575 ?
C75A C22A C64A 46(10) 6_575 6_575 ?
C21A C22A C64A 74.0(19) . 6_575 ?
C70A C22A C64A 120(3) 6_575 6_575 ?
C23A C22A C64A 144(3) . 6_575 ?
C73A C22A C64A 95(2) 6_575 6_575 ?
C71A C23A C70A 97(5) 6_575 6_575 ?
C71A C23A C24A 66(3) 6_575 . ?
C70A C23A C24A 160(5) 6_575 . ?
C71A C23A C22A 159(4) 6_575 . ?
C70A C23A C22A 62(4) 6_575 . ?
C24A C23A C22A 134(2) . . ?
C71A C23A C66A 87(4) 6_575 6_575 ?
C70A C23A C66A 168(4) 6_575 6_575 ?
C22A C23A C66A 113.0(19) . 6_575 ?
C71A C23A C75A 160(4) 6_575 6_575 ?
C70A C23A C75A 64(4) 6_575 6_575 ?
C24A C23A C75A 131(2) . 6_575 ?
C66A C23A C75A 110.0(18) 6_575 6_575 ?
C71A C23A C31A 53(3) 6_575 . ?
C70A C23A C31A 47(4) 6_575 . ?
C24A C23A C31A 113(2) . . ?
C22A C23A C31A 107.5(16) . . ?
C66A C23A C31A 133(2) 6_575 . ?
C75A C23A C31A 107.2(17) 6_575 . ?
C66A C24A C71A 140(6) 6_575 6_575 ?
C66A C24A C23A 106(5) 6_575 . ?
C66A C24A C46A 79(5) 6_575 6_575 ?
C71A C24A C46A 138(3) 6_575 6_575 ?
C23A C24A C46A 157(3) . 6_575 ?
C71A C24A C19A 142(3) 6_575 . ?
C23A C24A C19A 108(2) . . ?
C46A C24A C19A 72.7(16) 6_575 . ?
C66A C24A C25A 124(5) 6_575 . ?
C71A C24A C25A 92(2) 6_575 . ?
C23A C24A C25A 122(2) . . ?
C19A C24A C25A 116.5(19) . . ?
C66A C24A C70A 112(6) 6_575 6_575 ?
C46A C24A C70A 151(2) 6_575 6_575 ?
C19A C24A C70A 114(2) . 6_575 ?
C25A C24A C70A 115(2) . 6_575 ?
C71A C24A C79A 125(3) 6_575 6_575 ?
C23A C24A C79A 91(2) . 6_575 ?
C46A C24A C79A 90.6(17) 6_575 6_575 ?
C25A C24A C79A 133.2(18) . 6_575 ?
C70A C24A C79A 97(2) 6_575 6_575 ?
C66A C24A C47A 159(6) 6_575 6_575 ?
C71A C24A C47A 51.8(19) 6_575 6_575 ?
C23A C24A C47A 82.8(19) . 6_575 ?
C46A C24A C47A 86.1(17) 6_575 6_575 ?
C19A C24A C47A 149.1(19) . 6_575 ?
C70A C24A C47A 75.4(17) 6_575 6_575 ?
C79A C24A C47A 155.1(17) 6_575 6_575 ?
C46A C25A C46A 55.4(18) . 6_575 ?
C46A C25A C47A 159.0(14) . 6_575 ?
C46A C25A C47A 132.0(13) 6_575 6_575 ?
C46A C25A C47A 132.0(13) . . ?
C46A C25A C47A 159.1(14) 6_575 . ?
C46A C25A C24A 54.4(12) . 6_575 ?
C46A C25A C24A 108.7(15) 6_575 6_575 ?
C47A C25A C24A 110.5(16) 6_575 6_575 ?
C47A C25A C24A 78.3(14) . 6_575 ?
C46A C25A C24A 108.7(15) . . ?
C46A C25A C24A 54.4(12) 6_575 . ?
C47A C25A C24A 78.3(14) 6_575 . ?
C47A C25A C24A 110.5(16) . . ?
C24A C25A C24A 152.2(16) 6_575 . ?
C18A C26A C18A 136.0(13) 6_575 . ?
C18A C26A C46A 130.0(12) 6_575 6_575 ?
C18A C26A C46A 83.6(10) . 6_575 ?
C18A C26A C46A 83.6(10) 6_575 . ?
C18A C26A C46A 130.0(12) . . ?
C46A C26A C46A 48.0(14) 6_575 . ?
C18A C26A C67A 106.9(12) 6_575 6_575 ?
C46A C26A C67A 113.1(10) 6_575 6_575 ?
C46A C26A C67A 153.9(12) . 6_575 ?
C18A C26A C67A 106.9(12) . . ?
C46A C26A C67A 153.9(12) 6_575 . ?
C46A C26A C67A 113.1(10) . . ?
C67A C26A C67A 76.9(16) 6_575 . ?
C64A C27A C28A 53.7(17) 6_575 . ?
C64A C27A C48A 81(2) 6_575 6_575 ?
C64A C27A C33A 160.6(19) 6_575 . ?
C28A C27A C33A 118.2(19) . . ?
C48A C27A C33A 90.4(18) 6_575 . ?
C64A C27A C63A 137.0(19) 6_575 6_575 ?
C28A C27A C63A 86.8(17) . 6_575 ?
C48A C27A C63A 58.9(16) 6_575 6_575 ?
C64A C27A C75A 63.9(17) 6_575 6_575 ?
C28A C27A C75A 117(2) . 6_575 ?
C48A C27A C75A 140(2) 6_575 6_575 ?
C33A C27A C75A 117(2) . 6_575 ?
C63A C27A C75A 143(3) 6_575 6_575 ?
C64A C27A C22A 69.9(17) 6_575 . ?
C28A C27A C22A 123(2) . . ?
C48A C27A C22A 147(2) 6_575 . ?
C33A C27A C22A 112.8(16) . . ?
C63A C27A C22A 141.4(19) 6_575 . ?
C64A C27A C70A 111.0(19) 6_575 6_575 ?
C28A C27A C70A 156.3(19) . 6_575 ?
C48A C27A C70A 150(2) 6_575 6_575 ?
C33A C27A C70A 69.5(16) . 6_575 ?
C63A C27A C70A 99.4(19) 6_575 6_575 ?
C75A C27A C70A 47.8(17) 6_575 6_575 ?
C64A C27A C69A 151.3(18) 6_575 6_575 ?
C28A C27A C69A 134.5(19) . 6_575 ?
C48A C27A C69A 108(2) 6_575 6_575 ?
C63A C27A C69A 50.4(14) 6_575 6_575 ?
C75A C27A C69A 96.1(18) 6_575 6_575 ?
C22A C27A C69A 92.5(15) . 6_575 ?
C70A C27A C69A 49.4(15) 6_575 6_575 ?
C48A C28A C64A 135(6) 6_575 6_575 ?
C48A C28A C27A 77(4) 6_575 . ?
C64A C28A C27A 60.6(19) 6_575 . ?
C64A C28A C29A 157(3) 6_575 . ?
C27A C28A C29A 118(2) . . ?
C48A C28A C07A 148(5) 6_575 . ?
C64A C28A C07A 60.5(18) 6_575 . ?
C27A C28A C07A 120(2) . . ?
C29A C28A C07A 111(2) . . ?
C48A C28A C74A 64(4) 6_575 6_575 ?
C64A C28A C74A 145(3) 6_575 6_575 ?
C27A C28A C74A 138(2) . 6_575 ?
C07A C28A C74A 89.7(19) . 6_575 ?
C64A C28A C63A 112(2) 6_575 6_575 ?
C27A C28A C63A 53.3(14) . 6_575 ?
C29A C28A C63A 65.2(13) . 6_575 ?
C07A C28A C63A 154(2) . 6_575 ?
C74A C28A C63A 86.6(16) 6_575 6_575 ?
C48A C28A C76A 154(6) 6_575 6_575 ?
C27A C28A C76A 103.0(19) . 6_575 ?
C29A C28A C76A 125.8(18) . 6_575 ?
C74A C28A C76A 105.2(17) 6_575 6_575 ?
C63A C28A C76A 145.2(18) 6_575 6_575 ?
C74A C29A C48A 110(5) 6_575 6_575 ?
C74A C29A C35A 141(4) 6_575 . ?
C48A C29A C35A 103(2) 6_575 . ?
C48A C29A C36A 142(3) 6_575 . ?
C35A C29A C36A 104.5(18) . . ?
C74A C29A C28A 89(4) 6_575 . ?
C35A C29A C28A 123.8(17) . . ?
C36A C29A C28A 123(2) . . ?
C74A C29A C80A 80(4) 6_575 6_575 ?
C48A C29A C80A 163(3) 6_575 6_575 ?
C35A C29A C80A 63.6(15) . 6_575 ?
C28A C29A C80A 164(2) . 6_575 ?
C74A C29A C63A 153(5) 6_575 6_575 ?
C48A C29A C63A 48.0(16) 6_575 6_575 ?
C35A C29A C63A 55.5(12) . 6_575 ?
C36A C29A C63A 152(2) . 6_575 ?
C28A C29A C63A 68.9(13) . 6_575 ?
C80A C29A C63A 118.6(19) 6_575 6_575 ?
C48A C29A C60A 101(2) 6_575 6_575 ?
C35A C29A C60A 142.3(18) . 6_575 ?
C28A C29A C60A 80.6(16) . 6_575 ?
C80A C29A C60A 86.1(14) 6_575 6_575 ?
C63A C29A C60A 142.2(16) 6_575 6_575 ?
C61A C30A C60A 158(6) 6_575 6_575 ?
C61A C30A C36A 92(3) 6_575 . ?
C60A C30A C36A 72(3) 6_575 . ?
C61A C30A C06A 140(4) 6_575 . ?
C60A C30A C06A 47(3) 6_575 . ?
C36A C30A C06A 117(3) . . ?
C60A C30A C37A 159(4) 6_575 . ?
C36A C30A C37A 121(2) . . ?
C06A C30A C37A 114(3) . . ?
C60A C30A C54A 141(4) 6_575 6_575 ?
C36A C30A C54A 127(2) . 6_575 ?
C06A C30A C54A 99(2) . 6_575 ?
C61A C30A C74A 122(4) 6_575 6_575 ?
C06A C30A C74A 87(2) . 6_575 ?
C37A C30A C74A 149(2) . 6_575 ?
C54A C30A C74A 146(2) 6_575 6_575 ?
C61A C30A C59A 143(4) 6_575 6_575 ?
C36A C30A C59A 112(2) . 6_575 ?
C37A C30A C59A 119(2) . 6_575 ?
C54A C30A C59A 103(2) 6_575 6_575 ?
C74A C30A C59A 81.8(15) 6_575 6_575 ?
C60A C30A C62A 119(4) 6_575 6_575 ?
C36A C30A C62A 49.2(13) . 6_575 ?
C06A C30A C62A 153(3) . 6_575 ?
C37A C30A C62A 71.9(14) . 6_575 ?
C54A C30A C62A 80.6(16) 6_575 6_575 ?
C74A C30A C62A 78.8(15) 6_575 6_575 ?
C59A C30A C62A 149(2) 6_575 6_575 ?
C69A C31A C70A 90(3) 6_575 6_575 ?
C69A C31A C71A 135(4) 6_575 6_575 ?
C70A C31A C71A 45.6(17) 6_575 6_575 ?
C69A C31A C32A 118(3) 6_575 . ?
C70A C31A C32A 143(2) 6_575 . ?
C71A C31A C32A 101(2) 6_575 . ?
C69A C31A C72A 69(3) 6_575 6_575 ?
C70A C31A C72A 153(2) 6_575 6_575 ?
C71A C31A C72A 149(2) 6_575 6_575 ?
C32A C31A C72A 49.7(13) . 6_575 ?
C70A C31A C33A 78.4(18) 6_575 . ?
C71A C31A C33A 124(2) 6_575 . ?
C32A C31A C33A 128(2) . . ?
C72A C31A C33A 79.6(16) 6_575 . ?
C69A C31A C47A 156(3) 6_575 6_575 ?
C70A C31A C47A 103(2) 6_575 6_575 ?
C71A C31A C47A 59.1(16) 6_575 6_575 ?
C72A C31A C47A 91.9(17) 6_575 6_575 ?
C33A C31A C47A 159.2(15) . 6_575 ?
C69A C31A C23A 112(3) 6_575 . ?
C32A C31A C23A 120.2(18) . . ?
C72A C31A C23A 157.0(15) 6_575 . ?
C33A C31A C23A 100.9(15) . . ?
C47A C31A C23A 79.6(15) 6_575 . ?
C47A C32A C72A 165.8(15) 6_575 . ?
C47A C32A C72A 140.3(15) . . ?
C47A C32A C72A 140.3(15) 6_575 6_575 ?
C47A C32A C72A 165.8(15) . 6_575 ?
C47A C32A C31A 74.7(15) 6_575 . ?
C47A C32A C31A 110.8(18) . . ?
C72A C32A C31A 102.3(18) . . ?
C72A C32A C31A 66.2(15) 6_575 . ?
C47A C32A C31A 110.8(18) 6_575 6_575 ?
C47A C32A C31A 74.7(15) . 6_575 ?
C72A C32A C31A 66.2(15) . 6_575 ?
C72A C32A C31A 102.4(18) 6_575 6_575 ?
C31A C32A C31A 155.5(18) . 6_575 ?
C69A C33A C63A 145(5) 6_575 6_575 ?
C69A C33A C27A 121(3) 6_575 . ?
C63A C33A C27A 82(3) 6_575 . ?
C69A C33A C34A 106(3) 6_575 . ?
C27A C33A C34A 119.7(17) . . ?
C63A C33A C31A 151(3) 6_575 . ?
C27A C33A C31A 109.5(14) . . ?
C34A C33A C31A 116(2) . . ?
C69A C33A C70A 56(3) 6_575 6_575 ?
C63A C33A C70A 143(3) 6_575 6_575 ?
C27A C33A C70A 65.7(15) . 6_575 ?
C34A C33A C70A 148.9(19) . 6_575 ?
C69A C33A C48A 151(3) 6_575 6_575 ?
C34A C33A C48A 79.4(14) . 6_575 ?
C31A C33A C48A 141.8(16) . 6_575 ?
C70A C33A C48A 104.0(17) 6_575 6_575 ?
C65A C34A C63A 151(5) 6_575 6_575 ?
C65A C34A C35A 60(3) 6_575 . ?
C63A C34A C35A 91(3) 6_575 . ?
C65A C34A C33A 173(4) 6_575 . ?
C35A C34A C33A 121(2) . . ?
C65A C34A C42A 62(3) 6_575 . ?
C63A C34A C42A 144(3) 6_575 . ?
C35A C34A C42A 117.9(17) . . ?
C33A C34A C42A 115(2) . . ?
C65A C34A C69A 151(4) 6_575 6_575 ?
C63A C34A C69A 54.6(18) 6_575 6_575 ?
C35A C34A C69A 140(2) . 6_575 ?
C42A C34A C69A 90.5(17) . 6_575 ?
C63A C34A C43A 123(3) 6_575 6_575 ?
C33A C34A C43A 149.6(18) . 6_575 ?
C42A C34A C43A 83.8(13) . 6_575 ?
C69A C34A C43A 154.1(19) 6_575 6_575 ?
C65A C34A C72A 106(4) 6_575 6_575 ?
C63A C34A C72A 101(2) 6_575 6_575 ?
C35A C34A C72A 155(2) . 6_575 ?
C33A C34A C72A 70.0(15) . 6_575 ?
C69A C34A C72A 46.0(11) 6_575 6_575 ?
C43A C34A C72A 125.7(17) 6_575 6_575 ?
C65A C35A C43A 75(2) 6_575 6_575 ?
C43A C35A C34A 111(2) 6_575 . ?
C65A C35A C29A 155(2) 6_575 . ?
C43A C35A C29A 124(2) 6_575 . ?
C34A C35A C29A 118.7(18) . . ?
C65A C35A C80A 137(2) 6_575 6_575 ?
C43A C35A C80A 62.1(17) 6_575 6_575 ?
C34A C35A C80A 168(2) . 6_575 ?
C29A C35A C80A 64.0(15) . 6_575 ?
C65A C35A C63A 77.9(19) 6_575 6_575 ?
C43A C35A C63A 149(2) 6_575 6_575 ?
C29A C35A C63A 78.6(14) . 6_575 ?
C80A C35A C63A 141.9(19) 6_575 6_575 ?
C65A C35A C39A 86.1(19) 6_575 . ?
C34A C35A C39A 122.2(18) . . ?
C29A C35A C39A 114.3(16) . . ?
C80A C35A C39A 51.3(13) 6_575 . ?
C63A C35A C39A 158.6(18) 6_575 . ?
C65A C35A C74A 161(2) 6_575 6_575 ?
C43A C35A C74A 113(2) 6_575 6_575 ?
C34A C35A C74A 127.9(18) . 6_575 ?
C80A C35A C74A 53.4(13) 6_575 6_575 ?
C63A C35A C74A 88.7(15) 6_575 6_575 ?
C39A C35A C74A 103.0(15) . 6_575 ?
C65A C35A C48A 122(2) 6_575 6_575 ?
C43A C35A C48A 151(2) 6_575 6_575 ?
C34A C35A C48A 85.2(16) . 6_575 ?
C80A C35A C48A 97.0(16) 6_575 6_575 ?
C63A C35A C48A 45.2(12) 6_575 6_575 ?
C39A C35A C48A 144.1(16) . 6_575 ?
C74A C36A C80A 97(2) 6_575 6_575 ?
C74A C36A C60A 70(2) 6_575 6_575 ?
C80A C36A C60A 167(2) 6_575 6_575 ?
C74A C36A C30A 107(3) 6_575 . ?
C80A C36A C30A 155(2) 6_575 . ?
C80A C36A C29A 76.4(18) 6_575 . ?
C60A C36A C29A 90.9(18) 6_575 . ?
C30A C36A C29A 127(2) . . ?
C74A C36A C62A 158(3) 6_575 6_575 ?
C80A C36A C62A 67.2(18) 6_575 6_575 ?
C60A C36A C62A 123.2(18) 6_575 6_575 ?
C30A C36A C62A 88.0(17) . 6_575 ?
C29A C36A C62A 139(2) . 6_575 ?
C74A C36A C61A 136(3) 6_575 6_575 ?
C80A C36A C61A 124(2) 6_575 6_575 ?
C60A C36A C61A 66.8(15) 6_575 6_575 ?
C29A C36A C61A 154(2) . 6_575 ?
C62A C36A C61A 57.3(12) 6_575 6_575 ?
C74A C36A C40A 133(2) 6_575 . ?
C60A C36A C40A 149.7(18) 6_575 . ?
C30A C36A C40A 116.2(18) . . ?
C29A C36A C40A 112.0(17) . . ?
C61A C36A C40A 85.5(14) 6_575 . ?
C54A C37A C61A 129(6) 6_575 6_575 ?
C61A C37A C38A 146(3) 6_575 . ?
C54A C37A C45A 89(4) 6_575 . ?
C61A C37A C45A 94(3) 6_575 . ?
C38A C37A C45A 109(2) . . ?
C54A C37A C30A 117(5) 6_575 . ?
C38A C37A C30A 122(2) . . ?
C45A C37A C30A 119.7(18) . . ?
C61A C37A C53A 119(3) 6_575 6_575 ?
C45A C37A C53A 123(2) . 6_575 ?
C30A C37A C53A 95.5(19) . 6_575 ?
C54A C37A C62A 124(4) 6_575 6_575 ?
C38A C37A C62A 156(2) . 6_575 ?
C45A C37A C62A 55.7(12) . 6_575 ?
C30A C37A C62A 65.0(14) . 6_575 ?
C53A C37A C62A 140.7(16) 6_575 6_575 ?
C54A C37A C55A 59(4) 6_575 . ?
C61A C37A C55A 122(3) 6_575 . ?
C38A C37A C55A 76.4(15) . . ?
C30A C37A C55A 142.3(18) . . ?
C53A C37A C55A 92.0(15) 6_575 . ?
C62A C37A C55A 86.3(13) 6_575 . ?
C54A C38A C53A 102(4) 6_575 6_575 ?
C53A C38A C37A 111(3) 6_575 . ?
C54A C38A C41A 89(3) 6_575 . ?
C53A C38A C41A 113(3) 6_575 . ?
C37A C38A C41A 104.0(19) . . ?
C54A C38A C01A 126(3) 6_575 . ?
C37A C38A C01A 129(2) . . ?
C41A C38A C01A 118(2) . . ?
C54A C38A C50A 121(3) 6_575 6_575 ?
C53A C38A C50A 55(2) 6_575 6_575 ?
C37A C38A C50A 144(2) . 6_575 ?
C41A C38A C50A 63.1(17) . 6_575 ?
C01A C38A C50A 55.2(15) . 6_575 ?
C53A C38A C61A 98(2) 6_575 6_575 ?
C41A C38A C61A 111.7(16) . 6_575 ?
C01A C38A C61A 116.1(19) . 6_575 ?
C50A C38A C61A 137.2(16) 6_575 6_575 ?
C43A C39A C39A 113(4) 6_575 6_575 ?
C43A C39A C40A 123(5) 6_575 . ?
C39A C39A C40A 108.5(11) 6_575 . ?
C43A C39A C80A 83(4) 6_575 6_575 ?
C39A C39A C80A 151.2(12) 6_575 6_575 ?
C43A C39A C43A 91(4) 6_575 . ?
C40A C39A C43A 123.6(19) . . ?
C80A C39A C43A 154(3) 6_575 . ?
C39A C39A C35A 134.6(9) 6_575 . ?
C40A C39A C35A 102.2(16) . . ?
C80A C39A C35A 59.9(14) 6_575 . ?
C43A C39A C35A 113.7(16) . . ?
C39A C39A C65A 104.7(10) 6_575 6_575 ?
C40A C39A C65A 132.7(17) . 6_575 ?
C80A C39A C65A 92.7(16) 6_575 6_575 ?
C43A C39A C65A 83.7(15) . 6_575 ?
C43A C39A C40A 137(4) 6_575 6_575 ?
C40A C39A C40A 69.2(16) . 6_575 ?
C80A C39A C40A 113.1(16) 6_575 6_575 ?
C43A C39A C40A 56.6(12) . 6_575 ?
C35A C39A C40A 146.4(15) . 6_575 ?
C65A C39A C40A 134.7(15) 6_575 6_575 ?
C62A C40A C80A 103(4) 6_575 6_575 ?
C62A C40A C39A 162(3) 6_575 . ?
C80A C40A C39A 70(2) 6_575 . ?
C62A C40A C44A 68(2) 6_575 . ?
C80A C40A C44A 166(3) 6_575 . ?
C39A C40A C44A 114.8(17) . . ?
C62A C40A C36A 63(3) 6_575 . ?
C39A C40A C36A 106.9(16) . . ?
C44A C40A C36A 127.8(15) . . ?
C62A C40A C43A 148(3) 6_575 6_575 ?
C80A C40A C43A 56.6(18) 6_575 6_575 ?
C44A C40A C43A 125.1(18) . 6_575 ?
C36A C40A C43A 91.3(15) . 6_575 ?
C62A C40A C40A 110(3) 6_575 6_575 ?
C80A C40A C40A 139.0(19) 6_575 6_575 ?
C39A C40A C40A 71.5(11) . 6_575 ?
C36A C40A C40A 149.8(11) . 6_575 ?
C43A C40A C40A 82.9(12) 6_575 6_575 ?
C62A C40A C39A 146(3) 6_575 6_575 ?
C80A C40A C39A 101(2) 6_575 6_575 ?
C44A C40A C39A 82.6(14) . 6_575 ?
C36A C40A C39A 132.8(15) . 6_575 ?
C41A C41A C49A 62.1(11) 6_575 . ?
C41A C41A C55A 62.8(12) 6_575 . ?
C49A C41A C55A 122(2) . . ?
C41A C41A C38A 162.0(11) 6_575 . ?
C49A C41A C38A 125(2) . . ?
C55A C41A C38A 103.8(17) . . ?
C41A C41A C50A 119.5(12) 6_575 6_575 ?
C49A C41A C50A 60.8(13) . 6_575 ?
C55A C41A C50A 144.8(16) . 6_575 ?
C38A C41A C50A 63.8(16) . 6_575 ?
C41A C41A C54A 131.5(13) 6_575 6_575 ?
C49A C41A C54A 137.9(19) . 6_575 ?
C55A C41A C54A 74.1(15) . 6_575 ?
C50A C41A C54A 84.0(17) 6_575 6_575 ?
C41A C41A C53A 146.8(10) 6_575 6_575 ?
C49A C41A C53A 100.7(16) . 6_575 ?
C55A C41A C53A 115.7(16) . 6_575 ?
C65A C42A C65A 97(2) 6_575 . ?
C65A C42A C72A 111.5(14) 6_575 6_575 ?
C65A C42A C72A 144.0(15) . 6_575 ?
C65A C42A C72A 144.0(15) 6_575 . ?
C65A C42A C72A 111.5(14) . . ?
C65A C42A C34A 122.3(15) 6_575 6_575 ?
C72A C42A C34A 117.6(16) 6_575 6_575 ?
C72A C42A C34A 84.4(13) . 6_575 ?
C65A C42A C34A 122.3(15) . . ?
C72A C42A C34A 84.4(13) 6_575 . ?
C72A C42A C34A 117.6(16) . . ?
C34A C42A C34A 143.3(18) 6_575 . ?
C39A C43A C35A 146(5) 6_575 6_575 ?
C39A C43A C65A 165(5) 6_575 . ?
C35A C43A C65A 47.7(16) 6_575 . ?
C39A C43A C80A 74(4) 6_575 . ?
C35A C43A C80A 71.9(18) 6_575 . ?
C65A C43A C80A 119.6(18) . . ?
C39A C43A C39A 46(3) 6_575 . ?
C35A C43A C39A 164(3) 6_575 . ?
C65A C43A C39A 122.1(18) . . ?
C80A C43A C39A 116.3(17) . . ?
C39A C43A C43A 67(4) 6_575 6_575 ?
C35A C43A C43A 144.6(16) 6_575 6_575 ?
C65A C43A C43A 101.3(12) . 6_575 ?
C80A C43A C43A 134.4(12) . 6_575 ?
C35A C43A C40A 108(2) 6_575 6_575 ?
C65A C43A C40A 153(2) . 6_575 ?
C39A C43A C40A 78.7(15) . 6_575 ?
C43A C43A C40A 97.1(12) 6_575 6_575 ?
C39A C43A C34A 179(5) 6_575 6_575 ?
C80A C43A C34A 105.8(17) . 6_575 ?
C39A C43A C34A 133.0(19) . 6_575 ?
C43A C43A C34A 111.9(12) 6_575 6_575 ?
C40A C43A C34A 138.3(18) 6_575 6_575 ?
C62A C44A C62A 151(2) . 6_575 ?
C62A C44A C40A 125.3(17) . . ?
C62A C44A C40A 125.3(17) 6_575 6_575 ?
C40A C44A C40A 93.4(19) . 6_575 ?
C62A C44A C45A 120.0(16) . . ?
C62A C44A C45A 71.1(12) 6_575 . ?
C40A C44A C45A 104.9(12) . . ?
C40A C44A C45A 151.2(15) 6_575 . ?
C62A C44A C45A 71.1(12) . 6_575 ?
C62A C44A C45A 120.0(16) 6_575 6_575 ?
C40A C44A C45A 151.2(15) . 6_575 ?
C40A C44A C45A 104.9(12) 6_575 6_575 ?
C45A C44A C45A 50.4(16) . 6_575 ?
C55A C45A C45A 54.5(11) . 6_575 ?
C55A C45A C37A 106.7(17) . . ?
C45A C45A C37A 156.7(13) 6_575 . ?
C55A C45A C54A 83.5(17) . 6_575 ?
C45A C45A C54A 132.1(14) 6_575 6_575 ?
C55A C45A C44A 118.3(16) . . ?
C45A C45A C44A 64.8(8) 6_575 . ?
C37A C45A C44A 127.8(16) . . ?
C54A C45A C44A 139.3(18) 6_575 . ?
C55A C45A C61A 132.2(19) . 6_575 ?
C45A C45A C61A 152.3(11) 6_575 6_575 ?
C54A C45A C61A 49.5(15) 6_575 6_575 ?
C44A C45A C61A 97.4(14) . 6_575 ?
C55A C45A C62A 155.0(19) . 6_575 ?
C45A C45A C62A 110.3(11) 6_575 6_575 ?
C37A C45A C62A 81.5(15) . 6_575 ?
C54A C45A C62A 98.8(17) 6_575 6_575 ?
C44A C45A C62A 46.7(11) . 6_575 ?
C61A C45A C62A 51.2(12) 6_575 6_575 ?
C46A C46A C25A 62.3(9) 6_575 . ?
C46A C46A C24A 140.1(14) 6_575 6_575 ?
C25A C46A C24A 79.9(14) . 6_575 ?
C46A C46A C66A 157.6(14) 6_575 . ?
C25A C46A C66A 101.7(14) . . ?
C46A C46A C26A 66.0(7) 6_575 . ?
C25A C46A C26A 126.1(14) . . ?
C24A C46A C26A 141.5(14) 6_575 . ?
C66A C46A C26A 122.1(14) . . ?
C46A C46A C19A 150.4(8) 6_575 6_575 ?
C25A C46A C19A 131.9(15) . 6_575 ?
C24A C46A C19A 54.7(13) 6_575 6_575 ?
C26A C46A C19A 89.7(11) . 6_575 ?
C46A C46A C18A 110.5(7) 6_575 6_575 ?
C25A C46A C18A 155.2(12) . 6_575 ?
C24A C46A C18A 98.1(14) 6_575 6_575 ?
C66A C46A C18A 77.0(12) . 6_575 ?
C26A C46A C18A 45.7(6) . 6_575 ?
C47A C47A C32A 71.6(12) 6_575 . ?
C47A C47A C25A 73.4(11) 6_575 . ?
C32A C47A C25A 141(2) . . ?
C47A C47A C71A 163.5(10) 6_575 . ?
C32A C47A C71A 114.0(19) . . ?
C25A C47A C71A 95.8(15) . . ?
C47A C47A C31A 132.9(11) 6_575 6_575 ?
C32A C47A C31A 62.9(12) . 6_575 ?
C25A C47A C31A 142.1(16) . 6_575 ?
C71A C47A C31A 51.3(15) . 6_575 ?
C47A C47A C24A 132.6(10) 6_575 6_575 ?
C32A C47A C24A 143.1(17) . 6_575 ?
C25A C47A C24A 61.0(12) . 6_575 ?
C31A C47A C24A 84.2(15) 6_575 6_575 ?
C28A C48A C29A 117(5) 6_575 6_575 ?
C28A C48A C27A 75(4) 6_575 6_575 ?
C29A C48A C27A 163(3) 6_575 6_575 ?
C28A C48A C63A 146(5) 6_575 . ?
C29A C48A C63A 96(2) 6_575 . ?
C27A C48A C63A 71.1(18) 6_575 . ?
C28A C48A C74A 94(4) 6_575 . ?
C27A C48A C74A 161(3) 6_575 . ?
C63A C48A C74A 118.1(19) . . ?
C29A C48A C64A 140(2) 6_575 . ?
C27A C48A C64A 47.7(14) 6_575 . ?
C63A C48A C64A 117.2(18) . . ?
C74A C48A C64A 116.9(17) . . ?
C28A C48A C33A 123(5) 6_575 6_575 ?
C29A C48A C33A 118(2) 6_575 6_575 ?
C27A C48A C33A 48.6(14) 6_575 6_575 ?
C74A C48A C33A 138(2) . 6_575 ?
C64A C48A C33A 94.9(15) . 6_575 ?
C28A C48A C35A 158(5) 6_575 6_575 ?
C27A C48A C35A 122(2) 6_575 6_575 ?
C63A C48A C35A 53.0(13) . 6_575 ?
C74A C48A C35A 65.2(14) . 6_575 ?
C64A C48A C35A 155(2) . 6_575 ?
C33A C48A C35A 74.6(12) 6_575 6_575 ?
C29A C48A C07A 99(2) 6_575 6_575 ?
C27A C48A C07A 89.2(18) 6_575 6_575 ?
C63A C48A C07A 152(2) . 6_575 ?
C74A C48A C07A 75.7(14) . 6_575 ?
C33A C48A C07A 133.5(17) 6_575 6_575 ?
C35A C48A C07A 135.3(18) 6_575 6_575 ?
C41A C49A C41A 56(2) . 6_575 ?
C41A C49A C15A 119.0(13) . . ?
C41A C49A C15A 162.6(15) 6_575 . ?
C41A C49A C15A 162.6(15) . 6_575 ?
C41A C49A C15A 119.0(13) 6_575 6_575 ?
C15A C49A C15A 60.4(17) . 6_575 ?
C41A C49A C50A 69.0(14) . 6_575 ?
C41A C49A C50A 121.3(18) 6_575 6_575 ?
C15A C49A C50A 50.0(12) . 6_575 ?
C15A C49A C50A 107.5(15) 6_575 6_575 ?
C41A C49A C50A 121.3(18) . . ?
C41A C49A C50A 69.0(14) 6_575 . ?
C15A C49A C50A 107.5(15) . . ?
C15A C49A C50A 50.0(12) 6_575 . ?
C50A C49A C50A 139.7(16) 6_575 . ?
C02A C50A C15A 69(2) 6_575 6_575 ?
C02A C50A C53A 91(2) 6_575 . ?
C15A C50A C53A 156(3) 6_575 . ?
C02A C50A C01A 66.7(18) 6_575 6_575 ?
C15A C50A C01A 135(3) 6_575 6_575 ?
C53A C50A C51A 111(2) . . ?
C01A C50A C51A 94(2) 6_575 . ?
C02A C50A C49A 133(2) 6_575 . ?
C15A C50A C49A 64.8(15) 6_575 . ?
C53A C50A C49A 135(3) . . ?
C01A C50A C49A 159(2) 6_575 . ?
C51A C50A C49A 107.4(16) . . ?
C02A C50A C41A 175(2) 6_575 6_575 ?
C15A C50A C41A 115(2) 6_575 6_575 ?
C53A C50A C41A 86(2) . 6_575 ?
C01A C50A C41A 109(2) 6_575 6_575 ?
C51A C50A C41A 154.9(19) . 6_575 ?
C49A C50A C41A 50.2(13) . 6_575 ?
C02A C50A C38A 123(2) 6_575 6_575 ?
C15A C50A C38A 168(2) 6_575 6_575 ?
C01A C50A C38A 56.4(17) 6_575 6_575 ?
C51A C50A C38A 147(2) . 6_575 ?
C49A C50A C38A 103(2) . 6_575 ?
C41A C50A C38A 53.1(15) 6_575 6_575 ?
C02A C51A C15A 98(3) 6_575 6_575 ?
C02A C51A C03A 77(3) 6_575 6_575 ?
C15A C51A C03A 174(3) 6_575 6_575 ?
C02A C51A C50A 54(3) 6_575 . ?
C15A C51A C50A 56.1(17) 6_575 . ?
C03A C51A C50A 118(2) 6_575 . ?
C02A C51A C58A 94(3) 6_575 . ?
C15A C51A C58A 168(3) 6_575 . ?
C50A C51A C58A 134(2) . . ?
C02A C51A C52A 154(3) 6_575 . ?
C15A C51A C52A 56.0(16) 6_575 . ?
C03A C51A C52A 129(2) 6_575 . ?
C50A C51A C52A 105.8(16) . . ?
C58A C51A C52A 112(2) . . ?
C02A C51A C12A 126(3) 6_575 6_575 ?
C15A C51A C12A 136(2) 6_575 6_575 ?
C03A C51A C12A 49.5(13) 6_575 6_575 ?
C50A C51A C12A 150.9(16) . 6_575 ?
C52A C51A C12A 79.7(14) . 6_575 ?
C14A C52A C15A 142.5(10) . . ?
C14A C52A C15A 142.5(10) . 6_575 ?
C15A C52A C15A 66.2(19) . 6_575 ?
C14A C52A C51A 102.5(10) . 6_575 ?
C15A C52A C51A 104.6(16) 6_575 6_575 ?
C14A C52A C51A 102.5(10) . . ?
C15A C52A C51A 104.6(16) . . ?
C51A C52A C51A 136.2(19) 6_575 . ?
C01A C53A C38A 118(4) 6_575 6_575 ?
C01A C53A C50A 83(3) 6_575 . ?
C38A C53A C50A 89(3) 6_575 . ?
C01A C53A C05A 75(4) 6_575 6_575 ?
C38A C53A C05A 138(4) 6_575 6_575 ?
C50A C53A C05A 133(3) . 6_575 ?
C01A C53A C54A 151(5) 6_575 . ?
C50A C53A C54A 106(3) . . ?
C05A C53A C54A 113(2) 6_575 . ?
C01A C53A C56A 63(3) 6_575 . ?
C38A C53A C56A 141(4) 6_575 . ?
C50A C53A C56A 128(3) . . ?
C54A C53A C56A 123(2) . . ?
C01A C53A C02A 51(3) 6_575 6_575 ?
C38A C53A C02A 126(3) 6_575 6_575 ?
C05A C53A C02A 94(3) 6_575 6_575 ?
C54A C53A C02A 148(2) . 6_575 ?
C56A C53A C02A 86(2) . 6_575 ?
C01A C53A C37A 141(4) 6_575 6_575 ?
C50A C53A C37A 120(3) . 6_575 ?
C05A C53A C37A 102(2) 6_575 6_575 ?
C56A C53A C37A 110.7(18) . 6_575 ?
C02A C53A C37A 163(2) 6_575 6_575 ?
C01A C53A C41A 122(3) 6_575 6_575 ?
C50A C53A C41A 52.8(17) . 6_575 ?
C05A C53A C41A 163(2) 6_575 6_575 ?
C54A C53A C41A 54.7(17) . 6_575 ?
C56A C53A C41A 174(2) . 6_575 ?
C02A C53A C41A 94.8(15) 6_575 6_575 ?
C37A C53A C41A 68.0(16) 6_575 6_575 ?
C37A C54A C38A 124(6) 6_575 6_575 ?
C38A C54A C61A 141(4) 6_575 . ?
C37A C54A C53A 131(5) 6_575 . ?
C61A C54A C53A 123(2) . . ?
C37A C54A C45A 66(4) 6_575 6_575 ?
C38A C54A C45A 135(4) 6_575 6_575 ?
C61A C54A C45A 71.3(16) . 6_575 ?
C53A C54A C45A 162(3) . 6_575 ?
C37A C54A C41A 138(5) 6_575 6_575 ?
C38A C54A C41A 60(2) 6_575 6_575 ?
C61A C54A C41A 155(2) . 6_575 ?
C53A C54A C41A 81.4(19) . 6_575 ?
C45A C54A C41A 84.2(18) 6_575 6_575 ?
C37A C54A C55A 104(4) 6_575 . ?
C38A C54A C55A 103(3) 6_575 . ?
C61A C54A C55A 110.4(18) . . ?
C53A C54A C55A 124(2) . . ?
C38A C54A C30A 124(4) 6_575 6_575 ?
C53A C54A C30A 99.4(19) . 6_575 ?
C45A C54A C30A 93.9(19) 6_575 6_575 ?
C41A C54A C30A 174(2) 6_575 6_575 ?
C55A C54A C30A 132(2) . 6_575 ?
C37A C54A C01A 125(4) 6_575 6_575 ?
C61A C54A C01A 122.4(18) . 6_575 ?
C45A C54A C01A 166(2) 6_575 6_575 ?
C41A C54A C01A 82.1(16) 6_575 6_575 ?
C55A C54A C01A 126.7(17) . 6_575 ?
C30A C54A C01A 99.8(17) 6_575 6_575 ?
C45A C55A C45A 71(2) 6_575 . ?
C45A C55A C41A 116.3(15) 6_575 6_575 ?
C45A C55A C41A 167(2) . 6_575 ?
C45A C55A C41A 167(2) 6_575 . ?
C45A C55A C41A 116.3(15) . . ?
C41A C55A C41A 54(2) 6_575 . ?
C45A C55A C54A 56.8(13) 6_575 . ?
C45A C55A C54A 122.8(17) . . ?
C41A C55A C54A 60.7(14) 6_575 . ?
C41A C55A C54A 111.7(18) . . ?
C45A C55A C54A 122.8(16) 6_575 6_575 ?
C45A C55A C54A 56.8(13) . 6_575 ?
C41A C55A C54A 111.7(18) 6_575 6_575 ?
C41A C55A C54A 60.7(14) . 6_575 ?
C54A C55A C54A 140(2) . 6_575 ?
C45A C55A C37A 110.2(16) 6_575 . ?
C41A C55A C37A 128.8(17) 6_575 . ?
C41A C55A C37A 75.8(12) . . ?
C54A C55A C37A 146.3(12) . . ?
C45A C55A C37A 110.2(16) . 6_575 ?
C41A C55A C37A 75.8(12) 6_575 6_575 ?
C41A C55A C37A 128.8(17) . 6_575 ?
C54A C55A C37A 146.3(12) 6_575 6_575 ?
C37A C55A C37A 144.2(15) . 6_575 ?
C05A C56A C04A 115(10) 6_575 6_575 ?
C05A C56A C01A 71(7) 6_575 6_575 ?
C04A C56A C01A 109(3) 6_575 6_575 ?
C05A C56A C59A 67(7) 6_575 . ?
C04A C56A C59A 107(3) 6_575 . ?
C01A C56A C59A 133(2) 6_575 . ?
C05A C56A C06A 53(7) 6_575 6_575 ?
C04A C56A C06A 124(3) 6_575 6_575 ?
C01A C56A C06A 115(2) 6_575 6_575 ?
C05A C56A C57A 119(10) 6_575 . ?
C01A C56A C57A 103(2) 6_575 . ?
C59A C56A C57A 114(2) . . ?
C06A C56A C57A 131(3) 6_575 . ?
C04A C56A C53A 116(3) 6_575 . ?
C59A C56A C53A 109.5(18) . . ?
C06A C56A C53A 92(2) 6_575 . ?
C57A C56A C53A 114(3) . . ?
C04A C57A C03A 113(9) 6_575 6_575 ?
C04A C57A C09A 74(6) 6_575 6_575 ?
C03A C57A C09A 143(3) 6_575 6_575 ?
C04A C57A C82A 105(7) 6_575 . ?
C03A C57A C82A 122(3) 6_575 . ?
C04A C57A C58A 127(9) 6_575 . ?
C09A C57A C58A 129(3) 6_575 . ?
C82A C57A C58A 104(2) . . ?
C03A C57A C56A 102(3) 6_575 . ?
C09A C57A C56A 93(2) 6_575 . ?
C82A C57A C56A 124(3) . . ?
C58A C57A C56A 120(3) . . ?
C03A C57A C05A 97(3) 6_575 6_575 ?
C09A C57A C05A 92(2) 6_575 6_575 ?
C82A C57A C05A 122(3) . 6_575 ?
C58A C57A C05A 113(3) . 6_575 ?
C04A C57A Tb1 78(7) 6_575 6_575 ?
C03A C57A Tb1 79(2) 6_575 6_575 ?
C09A C57A Tb1 66.1(16) 6_575 6_575 ?
C82A C57A Tb1 67.0(16) . 6_575 ?
C58A C57A Tb1 73.4(17) . 6_575 ?
C56A C57A Tb1 92.9(18) . 6_575 ?
C05A C57A Tb1 82.7(16) 6_575 6_575 ?
C03A C58A C12A 151(8) 6_575 6_575 ?
C03A C58A C57A 57(6) 6_575 . ?
C12A C58A C57A 138(3) 6_575 . ?
C03A C58A C77A 159(7) 6_575 . ?
C57A C58A C77A 110.1(19) . . ?
C03A C58A C51A 57(5) 6_575 . ?
C12A C58A C51A 98(3) 6_575 . ?
C57A C58A C51A 112(3) . . ?
C77A C58A C51A 127(3) . . ?
C12A C58A C02A 123(3) 6_575 6_575 ?
C57A C58A C02A 90(2) . 6_575 ?
C77A C58A C02A 152(3) . 6_575 ?
C03A C58A C04A 49(5) 6_575 6_575 ?
C12A C58A C04A 139(3) 6_575 6_575 ?
C77A C58A C04A 115(2) . 6_575 ?
C51A C58A C04A 101(2) . 6_575 ?
C02A C58A C04A 80.6(17) 6_575 6_575 ?
C03A C58A Tb1 95(6) 6_575 6_575 ?
C12A C58A Tb1 72.3(19) 6_575 6_575 ?
C57A C58A Tb1 76.3(16) . 6_575 ?
C77A C58A Tb1 65.3(14) . 6_575 ?
C51A C58A Tb1 95.5(15) . 6_575 ?
C02A C58A Tb1 101.8(14) 6_575 6_575 ?
C04A C58A Tb1 70.7(13) 6_575 6_575 ?
C06A C59A C07A 126(7) 6_575 6_575 ?
C06A C59A C05A 76(6) 6_575 6_575 ?
C07A C59A C05A 148(3) 6_575 6_575 ?
C07A C59A C60A 88(2) 6_575 . ?
C05A C59A C60A 111(2) 6_575 . ?
C06A C59A C76A 155(8) 6_575 . ?
C05A C59A C76A 119(3) 6_575 . ?
C60A C59A C76A 119.2(19) . . ?
C06A C59A C56A 87(6) 6_575 . ?
C07A C59A C56A 144(3) 6_575 . ?
C60A C59A C56A 124.5(18) . . ?
C76A C59A C56A 112(2) . . ?
C07A C59A C30A 111(2) 6_575 6_575 ?
C05A C59A C30A 88(2) 6_575 6_575 ?
C76A C59A C30A 140(2) . 6_575 ?
C56A C59A C30A 101.0(18) . 6_575 ?
C06A C59A C08A 161(8) 6_575 6_575 ?
C05A C59A C08A 110(2) 6_575 6_575 ?
C60A C59A C08A 127.5(19) . 6_575 ?
C56A C59A C08A 102(2) . 6_575 ?
C30A C59A C08A 147(2) 6_575 6_575 ?
C30A C60A C06A 97(4) 6_575 6_575 ?
C30A C60A C36A 72(3) 6_575 6_575 ?
C06A C60A C36A 161(3) 6_575 6_575 ?
C30A C60A C74A 115(3) 6_575 . ?
C06A C60A C74A 145(3) 6_575 . ?
C30A C60A C59A 114(3) 6_575 . ?
C36A C60A C59A 162(3) 6_575 . ?
C74A C60A C59A 127.2(18) . . ?
C06A C60A C61A 102(2) 6_575 . ?
C36A C60A C61A 64.2(14) 6_575 . ?
C74A C60A C61A 107.2(18) . . ?
C59A C60A C61A 118.9(16) . . ?
C30A C60A C07A 154(3) 6_575 6_575 ?
C06A C60A C07A 59(2) 6_575 6_575 ?
C36A C60A C07A 128(2) 6_575 6_575 ?
C74A C60A C07A 86.4(16) . 6_575 ?
C61A C60A C07A 153.2(17) . 6_575 ?
C30A C60A C29A 118(3) 6_575 6_575 ?
C06A C60A C29A 140(3) 6_575 6_575 ?
C36A C60A C29A 46.2(13) 6_575 6_575 ?
C59A C60A C29A 123.2(16) . 6_575 ?
C61A C60A C29A 109.3(16) . 6_575 ?
C07A C60A C29A 82.7(14) 6_575 6_575 ?
C30A C61A C37A 124(5) 6_575 6_575 ?
C30A C61A C54A 116(4) 6_575 . ?
C30A C61A C62A 115(3) 6_575 . ?
C37A C61A C62A 121(3) 6_575 . ?
C54A C61A C62A 121.3(19) . . ?
C30A C61A C36A 57(3) 6_575 6_575 ?
C37A C61A C36A 174(4) 6_575 6_575 ?
C54A C61A C36A 152(3) . 6_575 ?
C62A C61A C36A 57.8(14) . 6_575 ?
C37A C61A C60A 131(3) 6_575 . ?
C54A C61A C60A 118.6(18) . . ?
C62A C61A C60A 106.2(16) . . ?
C30A C61A C45A 167(4) 6_575 6_575 ?
C37A C61A C45A 56(2) 6_575 6_575 ?
C54A C61A C45A 59.2(14) . 6_575 ?
C62A C61A C45A 65.1(13) . 6_575 ?
C36A C61A C45A 121.6(19) 6_575 6_575 ?
C60A C61A C45A 158(2) . 6_575 ?
C30A C61A C38A 106(3) 6_575 6_575 ?
C62A C61A C38A 135.2(16) . 6_575 ?
C36A C61A C38A 156.1(18) 6_575 6_575 ?
C60A C61A C38A 111.2(15) . 6_575 ?
C45A C61A C38A 71.1(13) 6_575 6_575 ?
C40A C62A C44A 78(3) 6_575 . ?
C44A C62A C80A 122.0(18) . . ?
C40A C62A C61A 153(3) 6_575 . ?
C44A C62A C61A 125.0(17) . . ?
C80A C62A C61A 109.0(17) . . ?
C40A C62A C36A 89(3) 6_575 6_575 ?
C44A C62A C36A 157(2) . 6_575 ?
C61A C62A C36A 64.9(15) . 6_575 ?
C40A C62A C45A 140(3) 6_575 6_575 ?
C44A C62A C45A 62.2(13) . 6_575 ?
C80A C62A C45A 167.1(19) . 6_575 ?
C61A C62A C45A 63.7(13) . 6_575 ?
C36A C62A C45A 127.0(18) 6_575 6_575 ?
C40A C62A C30A 131(3) 6_575 6_575 ?
C44A C62A C30A 144.2(18) . 6_575 ?
C80A C62A C30A 86.9(15) . 6_575 ?
C45A C62A C30A 85.2(15) 6_575 6_575 ?
C40A C62A C37A 171(3) 6_575 6_575 ?
C44A C62A C37A 104.7(14) . 6_575 ?
C80A C62A C37A 130.0(17) . 6_575 ?
C36A C62A C37A 85.8(15) 6_575 6_575 ?
C33A C63A C34A 109(4) 6_575 6_575 ?
C33A C63A C48A 116(3) 6_575 . ?
C34A C63A C48A 130(3) 6_575 . ?
C34A C63A C69A 93(2) 6_575 . ?
C48A C63A C69A 127.1(18) . . ?
C33A C63A C27A 66(2) 6_575 6_575 ?
C34A C63A C27A 160(3) 6_575 6_575 ?
C48A C63A C27A 50.0(14) . 6_575 ?
C69A C63A C27A 79.3(15) . 6_575 ?
C33A C63A C35A 155(4) 6_575 6_575 ?
C34A C63A C35A 48.8(19) 6_575 6_575 ?
C48A C63A C35A 81.8(16) . 6_575 ?
C69A C63A C35A 137.4(18) . 6_575 ?
C27A C63A C35A 129.9(17) 6_575 6_575 ?
C33A C63A C65A 120(3) 6_575 . ?
C48A C63A C65A 117.9(17) . . ?
C69A C63A C65A 103.9(15) . . ?
C27A C63A C65A 158.0(18) 6_575 . ?
C33A C63A C29A 150(3) 6_575 6_575 ?
C34A C63A C29A 94(2) 6_575 6_575 ?
C69A C63A C29A 152.9(17) . 6_575 ?
C27A C63A C29A 85.5(14) 6_575 6_575 ?
C65A C63A C29A 82.4(14) . 6_575 ?
C33A C63A C28A 106(3) 6_575 6_575 ?
C34A C63A C28A 138(3) 6_575 6_575 ?
C69A C63A C28A 117.4(17) . 6_575 ?
C35A C63A C28A 91.4(15) 6_575 6_575 ?
C65A C63A C28A 126.9(15) . 6_575 ?
C28A C64A C27A 66(2) 6_575 6_575 ?
C28A C64A C07A 75(2) 6_575 6_575 ?
C27A C64A C07A 139(2) 6_575 6_575 ?
C28A C64A C75A 134(2) 6_575 . ?
C27A C64A C75A 70.1(16) 6_575 . ?
C07A C64A C75A 143(2) 6_575 . ?
C28A C64A C76A 106(2) 6_575 . ?
C27A C64A C76A 164(2) 6_575 . ?
C75A C64A C76A 113.7(18) . . ?
C27A C64A C48A 51.6(14) 6_575 . ?
C07A C64A C48A 87.6(18) 6_575 . ?
C75A C64A C48A 118.7(17) . . ?
C76A C64A C48A 117.9(15) . . ?
C28A C64A C08A 127(2) 6_575 6_575 ?
C27A C64A C08A 161(2) 6_575 6_575 ?
C07A C64A C08A 52.1(15) 6_575 6_575 ?
C75A C64A C08A 93.9(16) . 6_575 ?
C48A C64A C08A 137.8(16) . 6_575 ?
C28A C64A C22A 132(2) 6_575 6_575 ?
C27A C64A C22A 66.7(16) 6_575 6_575 ?
C07A C64A C22A 148(2) 6_575 6_575 ?
C76A C64A C22A 118(2) . 6_575 ?
C48A C64A C22A 116.8(17) . 6_575 ?
C08A C64A C22A 98.1(19) 6_575 6_575 ?
C28A C64A C21A 168(2) 6_575 6_575 ?
C27A C64A C21A 108.8(19) 6_575 6_575 ?
C07A C64A C21A 107.5(18) 6_575 6_575 ?
C76A C64A C21A 76.5(15) . 6_575 ?
C48A C64A C21A 153.9(19) . 6_575 ?
C34A C65A C35A 83(3) 6_575 6_575 ?
C34A C65A C43A 137(4) 6_575 . ?
C35A C65A C43A 57.0(18) 6_575 . ?
C34A C65A C42A 91(3) 6_575 . ?
C35A C65A C42A 157(2) 6_575 . ?
C43A C65A C42A 119.4(18) . . ?
C35A C65A C63A 65.4(17) 6_575 . ?
C43A C65A C63A 120.4(16) . . ?
C42A C65A C63A 107.2(15) . . ?
C34A C65A C39A 141(3) 6_575 6_575 ?
C35A C65A C39A 61.1(16) 6_575 6_575 ?
C42A C65A C39A 116.4(17) . 6_575 ?
C63A C65A C39A 124.7(14) . 6_575 ?
C24A C66A C19A 164(7) 6_575 6_575 ?
C24A C66A C79A 158(7) 6_575 . ?
C24A C66A C46A 79(5) 6_575 . ?
C19A C66A C46A 91(2) 6_575 . ?
C79A C66A C46A 116.5(19) . . ?
C24A C66A C23A 53(5) 6_575 6_575 ?
C19A C66A C23A 129(3) 6_575 6_575 ?
C79A C66A C23A 106(2) . 6_575 ?
C46A C66A C23A 127(2) . 6_575 ?
C19A C66A C71A 153(3) 6_575 . ?
C79A C66A C71A 132(3) . . ?
C46A C66A C71A 104.6(17) . . ?
C17A C67A C18A 136(4) 6_575 6_575 ?
C17A C67A C68A 70(3) 6_575 . ?
C18A C67A C68A 69(2) 6_575 . ?
C17A C67A C16A 58(2) 6_575 . ?
C18A C67A C16A 149(2) 6_575 . ?
C68A C67A C16A 127(2) . . ?
C17A C67A C26A 153(3) 6_575 . ?
C18A C67A C26A 52.3(16) 6_575 . ?
C68A C67A C26A 119.6(18) . . ?
C16A C67A C26A 102.5(12) . . ?
C18A C67A C11A 120(2) 6_575 6_575 ?
C68A C67A C11A 53.9(19) . 6_575 ?
C16A C67A C11A 73.6(14) . 6_575 ?
C26A C67A C11A 153.4(13) . 6_575 ?
C17A C67A Tb1 57.7(19) 6_575 6_575 ?
C18A C67A Tb1 91.6(18) 6_575 6_575 ?
C68A C67A Tb1 65.7(17) . 6_575 ?
C16A C67A Tb1 75.4(9) . 6_575 ?
C26A C67A Tb1 101.7(9) . 6_575 ?
C11A C67A Tb1 51.7(8) 6_575 6_575 ?
C17A C68A C18A 75(2) 6_575 6_575 ?
C17A C68A C79A 151(3) 6_575 . ?
C18A C68A C79A 82.3(19) 6_575 . ?
C67A C68A C79A 122(2) . . ?
C17A C68A C78A 78(2) 6_575 . ?
C18A C68A C78A 150(3) 6_575 . ?
C67A C68A C78A 114(3) . . ?
C79A C68A C78A 118(3) . . ?
C17A C68A C20A 148(3) 6_575 6_575 ?
C18A C68A C20A 116(2) 6_575 6_575 ?
C67A C68A C20A 150(2) . 6_575 ?
C78A C68A C20A 82(2) . 6_575 ?
C17A C68A C10A 106(2) 6_575 6_575 ?
C18A C68A C10A 156(2) 6_575 6_575 ?
C67A C68A C10A 140(3) . 6_575 ?
C79A C68A C10A 88(2) . 6_575 ?
C20A C68A C10A 52.2(15) 6_575 6_575 ?
C17A C68A C11A 50.2(16) 6_575 6_575 ?
C18A C68A C11A 123(3) 6_575 6_575 ?
C67A C68A C11A 86(2) . 6_575 ?
C79A C68A C11A 141(3) . 6_575 ?
C20A C68A C11A 107(2) 6_575 6_575 ?
C10A C68A C11A 56.3(16) 6_575 6_575 ?
C17A C68A C19A 127(2) 6_575 6_575 ?
C18A C68A C19A 56.1(14) 6_575 6_575 ?
C67A C68A C19A 95.5(19) . 6_575 ?
C78A C68A C19A 140(3) . 6_575 ?
C20A C68A C19A 60.6(16) 6_575 6_575 ?
C10A C68A C19A 112(2) 6_575 6_575 ?
C11A C68A C19A 152(2) 6_575 6_575 ?
C17A C68A Tb1 73.1(16) 6_575 6_575 ?
C18A C68A Tb1 96.5(16) 6_575 6_575 ?
C67A C68A Tb1 88.4(19) . 6_575 ?
C79A C68A Tb1 92.2(19) . 6_575 ?
C78A C68A Tb1 62.8(17) . 6_575 ?
C20A C68A Tb1 76.1(13) 6_575 6_575 ?
C10A C68A Tb1 62.0(11) 6_575 6_575 ?
C11A C68A Tb1 59.2(12) 6_575 6_575 ?
C19A C68A Tb1 92.9(13) 6_575 6_575 ?
C33A C69A C31A 157(5) 6_575 6_575 ?
C33A C69A C72A 121(3) 6_575 . ?
C31A C69A C72A 79(3) 6_575 . ?
C31A C69A C63A 162(3) 6_575 . ?
C72A C69A C63A 104.9(17) . . ?
C33A C69A C70A 99(3) 6_575 . ?
C31A C69A C70A 58(3) 6_575 . ?
C72A C69A C70A 134(2) . . ?
C63A C69A C70A 111.2(18) . . ?
C33A C69A C34A 49(3) 6_575 6_575 ?
C31A C69A C34A 148(3) 6_575 6_575 ?
C72A C69A C34A 72.3(15) . 6_575 ?
C70A C69A C34A 139.3(18) . 6_575 ?
C31A C69A C27A 119(3) 6_575 6_575 ?
C72A C69A C27A 149.2(18) . 6_575 ?
C63A C69A C27A 50.4(11) . 6_575 ?
C70A C69A C27A 61.2(14) . 6_575 ?
C34A C69A C27A 81.9(14) 6_575 6_575 ?
C23A C70A C22A 87(4) 6_575 6_575 ?
C71A C70A C22A 127(4) . 6_575 ?
C23A C70A C31A 110(4) 6_575 6_575 ?
C71A C70A C31A 71(3) . 6_575 ?
C22A C70A C31A 157(3) 6_575 6_575 ?
C23A C70A C75A 87(4) 6_575 . ?
C71A C70A C75A 127(4) . . ?
C31A C70A C75A 150(3) 6_575 . ?
C23A C70A C69A 140(5) 6_575 . ?
C71A C70A C69A 104(4) . . ?
C22A C70A C69A 126(2) 6_575 . ?
C75A C70A C69A 122(2) . . ?
C23A C70A C27A 140(4) 6_575 6_575 ?
C71A C70A C27A 165(3) . 6_575 ?
C22A C70A C27A 57.2(17) 6_575 6_575 ?
C31A C70A C27A 101(2) 6_575 6_575 ?
C75A C70A C27A 54.7(15) . 6_575 ?
C69A C70A C27A 69.4(15) . 6_575 ?
C23A C70A C33A 159(5) 6_575 6_575 ?
C71A C70A C33A 128(4) . 6_575 ?
C22A C70A C33A 102(2) 6_575 6_575 ?
C31A C70A C33A 57.2(18) 6_575 6_575 ?
C75A C70A C33A 99.0(18) . 6_575 ?
C22A C70A C24A 98(3) 6_575 6_575 ?
C31A C70A C24A 97(2) 6_575 6_575 ?
C75A C70A C24A 97(3) . 6_575 ?
C69A C70A C24A 127(2) . 6_575 ?
C27A C70A C24A 146.0(19) 6_575 6_575 ?
C33A C70A C24A 148(2) 6_575 6_575 ?
C23A C71A C24A 80(4) 6_575 6_575 ?
C70A C71A C24A 122(4) . 6_575 ?
C23A C71A C31A 105(4) 6_575 6_575 ?
C70A C71A C31A 63(3) . 6_575 ?
C24A C71A C31A 153(3) 6_575 6_575 ?
C23A C71A C47A 152(4) 6_575 . ?
C70A C71A C47A 130(4) . . ?
C24A C71A C47A 93(2) 6_575 . ?
C31A C71A C47A 70(2) 6_575 . ?
C23A C71A C66A 67(4) 6_575 . ?
C70A C71A C66A 109(3) . . ?
C31A C71A C66A 154(2) 6_575 . ?
C47A C71A C66A 105.2(17) . . ?
C72A C72A C32A 71.6(11) 6_575 . ?
C72A C72A C42A 72.8(10) 6_575 . ?
C32A C72A C42A 139.2(19) . . ?
C72A C72A C69A 158.6(11) 6_575 . ?
C32A C72A C69A 94.8(16) . . ?
C42A C72A C69A 112.1(15) . . ?
C72A C72A C31A 134.2(12) 6_575 6_575 ?
C32A C72A C31A 64.0(13) . 6_575 ?
C42A C72A C31A 139.9(16) . 6_575 ?
C72A C72A C34A 122.0(9) 6_575 6_575 ?
C32A C72A C34A 146.9(13) . 6_575 ?
C42A C72A C34A 50.7(9) . 6_575 ?
C69A C72A C34A 61.7(13) . 6_575 ?
C31A C72A C34A 92.0(15) 6_575 6_575 ?
C21A C73A C20A 162(6) 6_575 6_575 ?
C21A C73A C79A 158(5) 6_575 . ?
C20A C73A C75A 152(5) 6_575 . ?
C79A C73A C75A 116(3) . . ?
C21A C73A C81A 68(4) 6_575 . ?
C20A C73A C81A 94(3) 6_575 . ?
C79A C73A C81A 133(3) . . ?
C75A C73A C81A 106(2) . . ?
C20A C73A C22A 151(5) 6_575 6_575 ?
C79A C73A C22A 113(2) . 6_575 ?
C81A C73A C22A 111(2) . 6_575 ?
C21A C73A C10A 121(4) 6_575 6_575 ?
C79A C73A C10A 80(2) . 6_575 ?
C75A C73A C10A 148(2) . 6_575 ?
C81A C73A C10A 52.9(16) . 6_575 ?
C22A C73A C10A 155(2) 6_575 6_575 ?
C21A C73A C19A 146(5) 6_575 6_575 ?
C20A C73A C19A 50(3) 6_575 6_575 ?
C75A C73A C19A 104(2) . 6_575 ?
C81A C73A C19A 140(2) . 6_575 ?
C22A C73A C19A 101(2) 6_575 6_575 ?
C10A C73A C19A 88.3(18) 6_575 6_575 ?
C20A C73A C08A 119(3) 6_575 6_575 ?
C79A C73A C08A 154(3) . 6_575 ?
C75A C73A C08A 79.3(17) . 6_575 ?
C22A C73A C08A 84.9(19) 6_575 6_575 ?
C10A C73A C08A 76.7(14) 6_575 6_575 ?
C19A C73A C08A 152(2) 6_575 6_575 ?
C21A C73A Tb1 100(4) 6_575 6_575 ?
C20A C73A Tb1 72(3) 6_575 6_575 ?
C79A C73A Tb1 85(2) . 6_575 ?
C75A C73A Tb1 97(2) . 6_575 ?
C81A C73A Tb1 69.8(16) . 6_575 ?
C22A C73A Tb1 103.0(18) 6_575 6_575 ?
C10A C73A Tb1 55.9(9) 6_575 6_575 ?
C19A C73A Tb1 80.3(13) 6_575 6_575 ?
C08A C73A Tb1 71.2(11) 6_575 6_575 ?
C29A C74A C36A 122(5) 6_575 6_575 ?
C29A C74A C60A 164(5) 6_575 . ?
C36A C74A C60A 66(2) 6_575 . ?
C29A C74A C48A 47(4) 6_575 . ?
C36A C74A C48A 159(4) 6_575 . ?
C60A C74A C48A 120.1(19) . . ?
C29A C74A C80A 78(4) 6_575 . ?
C60A C74A C80A 110.3(18) . . ?
C48A C74A C80A 123.9(18) . . ?
C29A C74A C28A 69(4) 6_575 6_575 ?
C36A C74A C28A 160(3) 6_575 6_575 ?
C60A C74A C28A 98.9(17) . 6_575 ?
C80A C74A C28A 146(2) . 6_575 ?
C29A C74A C30A 160(5) 6_575 6_575 ?
C48A C74A C30A 141(2) . 6_575 ?
C80A C74A C30A 86.5(16) . 6_575 ?
C28A C74A C30A 121.8(19) 6_575 6_575 ?
C36A C74A C35A 95(2) 6_575 6_575 ?
C60A C74A C35A 152(2) . 6_575 ?
C48A C74A C35A 71.2(14) . 6_575 ?
C80A C74A C35A 52.7(12) . 6_575 ?
C28A C74A C35A 93.2(17) 6_575 6_575 ?
C30A C74A C35A 133.5(19) 6_575 6_575 ?
C22A C75A C21A 121(10) 6_575 6_575 ?
C22A C75A C70A 54(10) 6_575 . ?
C21A C75A C70A 152(4) 6_575 . ?
C22A C75A C64A 128(10) 6_575 . ?
C21A C75A C64A 83(2) 6_575 . ?
C70A C75A C64A 123(2) . . ?
C22A C75A C73A 113(10) 6_575 . ?
C70A C75A C73A 127(3) . . ?
C64A C75A C73A 105.2(19) . . ?
C22A C75A C27A 96(10) 6_575 6_575 ?
C21A C75A C27A 129(3) 6_575 6_575 ?
C70A C75A C27A 77.5(19) . 6_575 ?
C64A C75A C27A 46.0(13) . 6_575 ?
C73A C75A C27A 150(2) . 6_575 ?
C22A C75A C23A 57(10) 6_575 6_575 ?
C21A C75A C23A 123(3) 6_575 6_575 ?
C64A C75A C23A 148(3) . 6_575 ?
C73A C75A C23A 99(2) . 6_575 ?
C27A C75A C23A 105(2) 6_575 6_575 ?
C08A C76A C07A 158(6) 6_575 6_575 ?
C08A C76A C59A 146(5) 6_575 . ?
C07A C76A C59A 55(3) 6_575 . ?
C07A C76A C81A 166(4) 6_575 . ?
C59A C76A C81A 133(2) . . ?
C08A C76A C64A 92(4) 6_575 . ?
C07A C76A C64A 65(3) 6_575 . ?
C59A C76A C64A 118.6(18) . . ?
C81A C76A C64A 102.2(16) . . ?
C08A C76A C09A 49(4) 6_575 6_575 ?
C07A C76A C09A 150(4) 6_575 6_575 ?
C59A C76A C09A 96.7(19) . 6_575 ?
C64A C76A C09A 135(2) . 6_575 ?
C08A C76A C06A 150(5) 6_575 6_575 ?
C07A C76A C06A 50(3) 6_575 6_575 ?
C81A C76A C06A 137(2) . 6_575 ?
C64A C76A C06A 112.5(18) . 6_575 ?
C09A C76A C06A 101.0(18) 6_575 6_575 ?
C07A C76A C21A 122(3) 6_575 6_575 ?
C59A C76A C21A 159(3) . 6_575 ?
C64A C76A C21A 57.4(13) . 6_575 ?
C09A C76A C21A 79.7(14) 6_575 6_575 ?
C06A C76A C21A 155(2) 6_575 6_575 ?
C08A C76A C28A 123(4) 6_575 6_575 ?
C59A C76A C28A 88.5(16) . 6_575 ?
C81A C76A C28A 131.9(16) . 6_575 ?
C09A C76A C28A 157(2) 6_575 6_575 ?
C06A C76A C28A 82.7(16) 6_575 6_575 ?
C21A C76A C28A 87.4(14) 6_575 6_575 ?
C08A C76A Tb1 73(6) 6_575 6_575 ?
C07A C76A Tb1 108(4) 6_575 6_575 ?
C59A C76A Tb1 88(2) . 6_575 ?
C81A C76A Tb1 65.1(18) . 6_575 ?
C64A C76A Tb1 95.1(17) . 6_575 ?
C09A C76A Tb1 57.0(13) 6_575 6_575 ?
C06A C76A Tb1 86.8(15) 6_575 6_575 ?
C21A C76A Tb1 72.5(12) 6_575 6_575 ?
C28A C76A Tb1 100.6(13) 6_575 6_575 ?
C12A C77A C11A 157(4) 6_575 6_575 ?
C12A C77A C13A 65(3) 6_575 . ?
C11A C77A C13A 108(4) 6_575 . ?
C11A C77A C58A 131(3) 6_575 . ?
C13A C77A C58A 109(3) . . ?
C12A C77A C78A 148(4) 6_575 . ?
C13A C77A C78A 133(4) . . ?
C58A C77A C78A 107.5(19) . . ?
C12A C77A C03A 47(3) 6_575 6_575 ?
C11A C77A C03A 127(3) 6_575 6_575 ?
C13A C77A C03A 110(3) . 6_575 ?
C78A C77A C03A 104(2) . 6_575 ?
C12A C77A C17A 137(3) 6_575 6_575 ?
C13A C77A C17A 76(2) . 6_575 ?
C58A C77A C17A 152.1(19) . 6_575 ?
C78A C77A C17A 58(2) . 6_575 ?
C03A C77A C17A 147.1(16) 6_575 6_575 ?
C12A C77A Tb1 90(3) 6_575 6_575 ?
C11A C77A Tb1 68.2(17) 6_575 6_575 ?
C13A C77A Tb1 88.2(15) . 6_575 ?
C58A C77A Tb1 82.3(15) . 6_575 ?
C78A C77A Tb1 68.9(15) . 6_575 ?
C03A C77A Tb1 77.5(11) 6_575 6_575 ?
C17A C77A Tb1 70.4(10) 6_575 6_575 ?
C11A C78A C10A 152(6) 6_575 6_575 ?
C11A C78A C82A 135(4) 6_575 . ?
C10A C78A C82A 48(3) 6_575 . ?
C11A C78A C68A 85(4) 6_575 . ?
C10A C78A C68A 82(3) 6_575 . ?
C82A C78A C68A 129(3) . . ?
C10A C78A C77A 144(4) 6_575 . ?
C82A C78A C77A 102(2) . . ?
C68A C78A C77A 120(3) . . ?
C10A C78A C17A 123(4) 6_575 6_575 ?
C82A C78A C17A 155(3) . 6_575 ?
C77A C78A C17A 75(2) . 6_575 ?
C11A C78A C20A 127(4) 6_575 6_575 ?
C82A C78A C20A 80(2) . 6_575 ?
C68A C78A C20A 48.8(16) . 6_575 ?
C77A C78A C20A 151(2) . 6_575 ?
C17A C78A C20A 91.0(16) 6_575 6_575 ?
C11A C78A Tb1 74(3) 6_575 6_575 ?
C10A C78A Tb1 80(3) 6_575 6_575 ?
C82A C78A Tb1 79.3(17) . 6_575 ?
C68A C78A Tb1 83.6(18) . 6_575 ?
C77A C78A Tb1 75.5(15) . 6_575 ?
C17A C78A Tb1 76.4(14) 6_575 6_575 ?
C20A C78A Tb1 77.0(12) 6_575 6_575 ?
C19A C79A C20A 152(5) 6_575 6_575 ?
C19A C79A C73A 138(5) 6_575 . ?
C19A C79A C68A 91(4) 6_575 . ?
C20A C79A C68A 77(3) 6_575 . ?
C73A C79A C68A 109(3) . . ?
C20A C79A C66A 140(4) 6_575 . ?
C73A C79A C66A 108(3) . . ?
C68A C79A C66A 126(2) . . ?
C19A C79A C18A 46(3) 6_575 6_575 ?
C20A C79A C18A 119(3) 6_575 6_575 ?
C73A C79A C18A 142(3) . 6_575 ?
C66A C79A C18A 82.0(17) . 6_575 ?
C20A C79A C24A 133(3) 6_575 6_575 ?
C73A C79A C24A 102(2) . 6_575 ?
C68A C79A C24A 129(2) . 6_575 ?
C18A C79A C24A 86.1(16) 6_575 6_575 ?
C19A C79A C21A 132(4) 6_575 6_575 ?
C68A C79A C21A 115(2) . 6_575 ?
C66A C79A C21A 101(2) . 6_575 ?
C18A C79A C21A 144.5(19) 6_575 6_575 ?
C24A C79A C21A 95.3(19) 6_575 6_575 ?
C40A C80A C36A 100(2) 6_575 6_575 ?
C40A C80A C39A 65.1(19) 6_575 6_575 ?
C36A C80A C39A 151(3) 6_575 6_575 ?
C40A C80A C43A 86(2) 6_575 . ?
C36A C80A C43A 143(3) 6_575 . ?
C36A C80A C62A 68.7(17) 6_575 . ?
C39A C80A C62A 95.6(16) 6_575 . ?
C43A C80A C62A 113.8(18) . . ?
C40A C80A C35A 129(3) 6_575 6_575 ?
C36A C80A C35A 110(2) 6_575 6_575 ?
C39A C80A C35A 68.8(15) 6_575 6_575 ?
C43A C80A C35A 46.0(14) . 6_575 ?
C62A C80A C35A 146(2) . 6_575 ?
C40A C80A C29A 150(3) 6_575 6_575 ?
C36A C80A C29A 60.3(17) 6_575 6_575 ?
C39A C80A C29A 120.1(19) 6_575 6_575 ?
C43A C80A C29A 97.4(17) . 6_575 ?
C62A C80A C29A 125.6(18) . 6_575 ?
C35A C80A C29A 52.4(12) 6_575 6_575 ?
C40A C80A C74A 135(2) 6_575 . ?
C39A C80A C74A 139(2) 6_575 . ?
C43A C80A C74A 117.2(18) . . ?
C62A C80A C74A 105.9(17) . . ?
C35A C80A C74A 73.9(14) 6_575 . ?
C08A C81A C09A 89(3) 6_575 6_575 ?
C08A C81A C82A 123(3) 6_575 . ?
C08A C81A C21A 82(2) 6_575 6_575 ?
C09A C81A C21A 155(3) 6_575 6_575 ?
C82A C81A C21A 145(3) . 6_575 ?
C09A C81A C76A 81(2) 6_575 . ?
C82A C81A C76A 116(3) . . ?
C21A C81A C76A 87.7(18) 6_575 . ?
C08A C81A C73A 107(3) 6_575 . ?
C09A C81A C73A 144(4) 6_575 . ?
C82A C81A C73A 119(3) . . ?
C76A C81A C73A 111.5(17) . . ?
C08A C81A C10A 151(4) 6_575 6_575 ?
C09A C81A C10A 76(2) 6_575 6_575 ?
C21A C81A C10A 102(2) 6_575 6_575 ?
C76A C81A C10A 145(3) . 6_575 ?
C73A C81A C10A 76(2) . 6_575 ?
C08A C81A C20A 131(3) 6_575 6_575 ?
C09A C81A C20A 122(3) 6_575 6_575 ?
C82A C81A C20A 93(2) . 6_575 ?
C21A C81A C20A 53.7(14) 6_575 6_575 ?
C76A C81A C20A 134.1(19) . 6_575 ?
C10A C81A C20A 48.9(13) 6_575 6_575 ?
C08A C81A Tb1 91(3) 6_575 6_575 ?
C09A C81A Tb1 67(2) 6_575 6_575 ?
C82A C81A Tb1 67.9(19) . 6_575 ?
C21A C81A Tb1 89.7(17) 6_575 6_575 ?
C76A C81A Tb1 86.3(19) . 6_575 ?
C73A C81A Tb1 79.7(18) . 6_575 ?
C10A C81A Tb1 60.4(13) 6_575 6_575 ?
C20A C81A Tb1 71.4(12) 6_575 6_575 ?
C09A C82A C10A 120(4) 6_575 6_575 ?
C09A C82A C81A 48(3) 6_575 . ?
C10A C82A C81A 78(3) 6_575 . ?
C09A C82A C57A 72(4) 6_575 . ?
C10A C82A C57A 144(3) 6_575 . ?
C81A C82A C57A 120(3) . . ?
C09A C82A C78A 144(4) 6_575 . ?
C81A C82A C78A 111(3) . . ?
C57A C82A C78A 116(2) . . ?
C09A C82A C04A 56(3) 6_575 6_575 ?
C10A C82A C04A 146(3) 6_575 6_575 ?
C81A C82A C04A 104(3) . 6_575 ?
C78A C82A C04A 125(2) . 6_575 ?
C10A C82A C08A 97(2) 6_575 6_575 ?
C57A C82A C08A 97(2) . 6_575 ?
C78A C82A C08A 127(2) . 6_575 ?
C04A C82A C08A 81.5(17) 6_575 6_575 ?
C09A C82A Tb1 80(3) 6_575 6_575 ?
C10A C82A Tb1 68.9(19) 6_575 6_575 ?
C81A C82A Tb1 83.7(18) . 6_575 ?
C57A C82A Tb1 82.4(18) . 6_575 ?
C78A C82A Tb1 67.2(17) . 6_575 ?
C04A C82A Tb1 77.3(16) 6_575 6_575 ?
C08A C82A Tb1 78.8(13) 6_575 6_575 ?
N3P Ni1P N2P 177.5(3) . . ?
N3P Ni1P N1P 90.00(13) . 6_575 ?
N2P Ni1P N1P 89.93(13) . 6_575 ?
N3P Ni1P N1P 90.00(13) . . ?
N2P Ni1P N1P 89.93(13) . . ?
N1P Ni1P N1P 177.0(3) 6_575 . ?
C02P N1P C07P 104.0(5) . 6_575 ?
C02P N1P Ni1P 128.2(4) . . ?
C07P N1P Ni1P 127.9(4) 6_575 . ?
C04P N2P C04P 105.0(6) 6_575 . ?
C04P N2P Ni1P 127.5(3) 6_575 . ?
C04P N2P Ni1P 127.5(3) . . ?
C09P N3P C09P 104.9(6) 6_575 . ?
C09P N3P Ni1P 127.5(3) 6_575 . ?
C09P N3P Ni1P 127.5(3) . . ?
C06P C01P C02P 106.0(5) 6_575 . ?
C06P C01P C11P 129.0(6) 6_575 . ?
C02P C01P C11P 125.0(5) . . ?
N1P C02P C03P 124.0(5) . . ?
N1P C02P C01P 112.3(5) . . ?
C03P C02P C01P 123.7(5) . . ?
C04P C03P C02P 125.0(5) . . ?
C04P C03P H03P 117.5 . . ?
C02P C03P H03P 117.5 . . ?
C03P C04P N2P 125.4(5) . . ?
C03P C04P C05P 124.4(5) . . ?
N2P C04P C05P 110.2(5) . . ?
C05P C05P C04P 107.3(3) 6_575 . ?
C05P C05P C12P 129.3(4) 6_575 . ?
C04P C05P C12P 123.2(6) . . ?
C01P C06P C07P 106.0(5) 6_575 . ?
C01P C06P C13P 129.5(6) 6_575 . ?
C07P C06P C13P 124.4(5) . . ?
N1P C07P C08P 124.6(5) 6_575 . ?
N1P C07P C06P 111.8(5) 6_575 . ?
C08P C07P C06P 123.6(5) . . ?
C09P C08P C07P 124.4(6) . . ?
C09P C08P H08P 117.8 . . ?
C07P C08P H08P 117.8 . . ?
C08P C09P N3P 125.5(5) . . ?
C08P C09P C10P 123.9(5) . . ?
N3P C09P C10P 110.5(5) . . ?
C10P C10P C09P 107.0(4) 6_575 . ?
C10P C10P C14P 129.3(4) 6_575 . ?
C09P C10P C14P 123.6(6) . . ?
C01P C11P C15P 112.6(6) . . ?
C01P C11P H11A 109.1 . . ?
C15P C11P H11A 109.1 . . ?
C01P C11P H11B 109.1 . . ?
C15P C11P H11B 109.1 . . ?
H11A C11P H11B 107.8 . . ?
C05P C12P C16P 112.0(5) . . ?
C05P C12P H12A 109.2 . . ?
C16P C12P H12A 109.2 . . ?
C05P C12P H12B 109.2 . . ?
C16P C12P H12B 109.2 . . ?
H12A C12P H12B 107.9 . . ?
C06P C13P C17P 112.6(6) . . ?
C06P C13P H13A 109.1 . . ?
C17P C13P H13A 109.1 . . ?
C06P C13P H13B 109.1 . . ?
C17P C13P H13B 109.1 . . ?
H13A C13P H13B 107.8 . . ?
C10P C14P C18P 112.9(5) . . ?
C10P C14P H14A 109.0 . . ?
C18P C14P H14A 109.0 . . ?
C10P C14P H14B 109.0 . . ?
C18P C14P H14B 109.0 . . ?
H14A C14P H14B 107.8 . . ?
C11P C15P H15A 109.5 . . ?
C11P C15P H15B 109.5 . . ?
H15A C15P H15B 109.5 . . ?
C11P C15P H15C 109.5 . . ?
H15A C15P H15C 109.5 . . ?
H15B C15P H15C 109.5 . . ?
C12P C16P H16A 109.5 . . ?
C12P C16P H16B 109.5 . . ?
H16A C16P H16B 109.5 . . ?
C12P C16P H16C 109.5 . . ?
H16A C16P H16C 109.5 . . ?
H16B C16P H16C 109.5 . . ?
C13P C17P H17A 109.5 . . ?
C13P C17P H17B 109.5 . . ?
H17A C17P H17B 109.5 . . ?
C13P C17P H17C 109.5 . . ?
H17A C17P H17C 109.5 . . ?
H17B C17P H17C 109.5 . . ?
C14P C18P H18A 109.5 . . ?
C14P C18P H18B 109.5 . . ?
H18A C18P H18B 109.5 . . ?
C14P C18P H18C 109.5 . . ?
H18A C18P H18C 109.5 . . ?
H18B C18P H18C 109.5 . . ?
C06S C01S C02S 120.1(10) . . ?
C06S C01S H01S 119.9 . . ?
C02S C01S H01S 119.9 . . ?
C03S C02S C01S 119.4(11) . . ?
C03S C02S H02S 120.3 . . ?
C01S C02S H02S 120.3 . . ?
C02S C03S C04S 120.3(11) . . ?
C02S C03S H03S 119.9 . . ?
C04S C03S H03S 119.9 . . ?
C05S C04S C03S 119.4(10) . . ?
C05S C04S H04S 120.3 . . ?
C03S C04S H04S 120.3 . . ?
C04S C05S C06S 121.2(11) . . ?
C04S C05S H05S 119.4 . . ?
C06S C05S H05S 119.4 . . ?
C05S C06S C01S 119.5(10) . . ?
C05S C06S H06S 120.2 . . ?
C01S C06S H06S 120.2 . . ?
C09S C07S C12S 120.0 . . ?
C09S C07S H07S 120.0 . . ?
C12S C07S H07S 120.0 . . ?
C07S C09S C08S 120.0 . . ?
C07S C09S H09S 120.0 . . ?
C08S C09S H09S 120.0 . . ?
C10S C08S C09S 120.0 . . ?
C10S C08S H08S 120.0 . . ?
C09S C08S H08S 120.0 . . ?
C11S C10S C08S 120.0 . . ?
C11S C10S H10S 120.0 . . ?
C08S C10S H10S 120.0 . . ?
C10S C11S C12S 120.0 . . ?
C10S C11S H11S 120.0 . . ?
C12S C11S H11S 120.0 . . ?
C11S C12S C07S 120.0 . . ?
C11S C12S H12S 120.0 . . ?
C07S C12S H12S 120.0 . . ?
 
_refine_diff_density_max    1.009
_refine_diff_density_min   -0.599
_refine_diff_density_rms    0.101

# start Validation Reply Form
_vrf_PLAT307_tbc83nii
;
PROBLEM: Isolated Metal Atom (Unusual !) ................<Tb6  
RESPONSE: This is a single endohedral metal atom
;
_vrf_PLAT308_tbc83nii
;
PROBLEM: Single Bonded Metal Atom (Unusual !) ....<Tb2<Tb3<Tb4<Tb5
RESPONSE: This is a single endohedral metal atom
;

_shelx_res_file
;

    tbc83nii.res created by SHELXL-2014/7

TITL TbCN@Cs(6)-C82/NiOEP/2benzene in C2/m
CELL  1.54178  25.3335  15.0135  19.8630   90.000   93.987   90.000
ZERR     4.00   0.0014   0.0011   0.0013    0.000    0.006    0.000
LATT   7
SYMM  - X,   Y, - Z
SFAC  C    N    NI   TB   H
UNIT  524  20   4    4    224
MERG   2
RTAB BOND Ni1P C16A
SUMP 0.5 0.00001 1.0 2 1.0 3 1.0 4 1.0 5 1.0 6 1.0 7
EADP C32A C42A C72A
EADP C35A C39A C40A
EADP Tb1 Tb2 Tb3 Tb4 Tb6
SIMU 0.02 C01A > C82A
SADI 0.06 C44A C55A C55A C61A C61A C44A C45A C54A C54A C62A C62A C45A
SADI 0.06 C44A C54A C45A C61A C55A C62A
SADI 0.06 C27A C29A C29A C34A C34A C27A C28A C35A C35A C33A C33A C28A
SADI 0.06 C27A C35A C28A C34A C29A C33A
SADI 0.06 C48A C60A C60A C76A C76A C48A C64A C59A C59A C74A C74A C64A
SADI 0.06 C48A C59A C64A C60A C74A C76A
SADI 0.06 C26A C66A C66A C68A C68A C26A C46A C79A C79A C67A C67A C46A
SADI 0.06 C26A C79A C46A C68A C66A C67A
SADI 0.06 C30A C40A C40A C45A C45A C30A C36A C37A C37A C44A C44A C36A
SADI 0.06 C30A C44A C36A C45A C37A C40A
SADI 0.06 C43A C74A C74A C63A C63A C43A C65A C48A C48A C80A C80A C65A
SADI 0.06 C43A C48A C63A C80A C65A C74A
SADI 0.06 C35A C43A C43A C42A C42A C35A C34A C39A C39A C65A C65A C34A
SADI 0.06 C35A C65A C34A C43A C39A C42A
SADI 0.06 C48A C69A C69A C75A C75A C48A C63A C64A C64A C70A C70A C63A
SADI 0.06 C48A C70A C63A C75A C64A C69A
SADI 0.06 C04A C06A C06A C08A C08A C04A C05A C07A C07A C09A C09A C05A
SADI 0.06 C04A C07A C05A C08A C06A C09A
SADI 0.06 C39A C44A C44A C80A C80A C39A C40A C62A C62A C43A C43A C40A
SADI 0.06 C39A C62A C40A C80A C43A C44A
SADI 0.06 C53A C59A C59A C61A C61A C53A C54A C56A C56A C60A C60A C54A
SADI 0.06 C53A C60A C54A C59A C56A C61A
SADI 0.06 C46A C66A C66A C71A C71A C47A C47A C25A C25A C46A
SADI 0.06 C46A C47A C47A C66A C66A C25A C25A C71A C71A C46A
SADI 0.06 C60A C74A C74A C80A C80A C62A C62A C61A C61A C60A
SADI 0.06 C60A C80A C80A C61A C61A C74A C74A C62A C62A C60A
SADI 0.06 C29A C35A C35A C39A C39A C40A C40A C36A C36A C29A
SADI 0.06 C29A C39A C39A C36A C36A C35A C35A C40A C40A C29A
SADI 0.06 C16A C17A C17A C18A C18A C26A C26A C67A C67A C16A
SADI 0.06 C16A C18A C18A C67A C67A C17A C17A C26A C26A C16A
SADI 0.06 C01A C02A C02A C03A C03A C04A C04A C05A C05A C01A
SADI 0.06 C01A C03A C03A C05A C05A C02A C02A C04A C04A C01A
SADI 0.06 C49A C15A C15A C52A C52A C51A C51A C50A C50A C49A
SADI 0.06 C49A C52A C52A C50A C50A C15A C15A C51A C51A C49A
SADI 0.06 C55A C41A C41A C38A C38A C37A C37A C45A C45A C55A
SADI 0.06 C55A C38A C38A C45A C45A C41A C41A C37A C37A C55A
SADI 0.06 C57A C78A C78A C58A C58A C82A C82A C77A C77A C57A
SADI 0.06 C57A C82A C82A C78A C78A C77A C77A C58A C58A C57A
SADI 0.06 C08A C10A C10A C21A C21A C09A C09A C20A C20A C08A
SADI 0.06 C08A C09A C09A C10A C10A C20A C20A C21A C21A C08A
SADI 0.06 C64A C73A C73A C76A C76A C75A C75A C81A C81A C64A
SADI 0.06 C64A C75A C75A C73A C73A C81A C81A C76A C76A C64A
SADI 0.06 C22A C31A C31A C27A C27A C23A C23A C33A C33A C22A
SADI 0.06 C22A C23A C23A C31A C31A C33A C33A C27A C27A C22A
SADI 0.06 C63A C72A C72A C65A C65A C69A C69A C42A C42A C63A
SADI 0.06 C63A C69A C69A C72A C72A C42A C42A C65A C65A C63A
FMAP   2
PLAN   25
SIZE     0.010   0.010   0.020
ACTA
BOND   $H
LIST   4
L.S.  25
TEMP  -173.15
WGHT    0.151600   32.049801
FVAR       0.04321   0.21473   0.09274   0.04082   0.01877   0.12409   0.00884
PART    1
TB1   4    0.662914    0.911648    0.721957    21.00000    0.02602    0.03698 =
         0.03221    0.00544   -0.00349   -0.00475
N1    2    0.728125    1.000000    0.694686    10.50000    0.08351    0.30889 =
         0.16011    0.00000   -0.00071    0.00000
C83   1    0.698803    1.000000    0.656613    10.50000    0.08006    0.38096 =
         0.09998    0.00000   -0.00806    0.00000
PART    2
TB2   4    0.686419    0.894048    0.748450    31.00000    0.02602    0.03698 =
         0.03221    0.00544   -0.00349   -0.00475
PART    3
TB3   4    0.652803    0.904850    0.699495    41.00000    0.02602    0.03698 =
         0.03221    0.00544   -0.00349   -0.00475
PART    4
TB4   4    0.669648    0.906335    0.754887    51.00000    0.02602    0.03698 =
         0.03221    0.00544   -0.00349   -0.00475
PART    5
TB5   4    0.654533    0.908125    0.690354    61.00000    0.58060
PART    6
TB6   4    0.621695    1.000000    0.678131    71.00000    0.02602    0.03698 =
         0.03221    0.00544   -0.00349   -0.00475
PART    1
C01A  1    0.593224    0.821163    0.561318    10.50000    0.07966    0.08901 =
         0.07053   -0.03023   -0.01539   -0.01959
C02A  1    0.557698    0.865055    0.602147    10.50000    0.04484    0.07476 =
         0.06921   -0.01669   -0.00420    0.00248
C03A  1    0.569193    0.834012    0.665746    10.50000    0.04588    0.05879 =
         0.07409   -0.02737   -0.01478   -0.00286
C04A  1    0.613349    0.771167    0.660208    10.50000    0.08194    0.05965 =
         0.08359   -0.02983   -0.02739   -0.00730
C05A  1    0.635507    0.787601    0.599486    10.50000    0.10049    0.08050 =
         0.09126   -0.04214   -0.03788    0.02293
C06A  1    0.685788    0.769083    0.589413    10.50000    0.12244    0.07432 =
         0.09506   -0.03649    0.00204    0.04087
C07A  1    0.720953    0.740062    0.650306    10.50000    0.11454    0.06547 =
         0.09102   -0.01934    0.00173    0.04418
C08A  1    0.697299    0.728228    0.705467    10.50000    0.08715    0.05124 =
         0.09088   -0.00936   -0.00457    0.02666
C09A  1    0.646416    0.745335    0.711637    10.50000    0.07755    0.03413 =
         0.08093    0.00265   -0.01955    0.00397
C10A  1    0.641373    0.782930    0.785804    10.50000    0.11354    0.04373 =
         0.04903    0.01838    0.00605   -0.02430
C11A  1    0.602307    0.857471    0.794016    10.50000    0.08730    0.08748 =
         0.05464   -0.01625    0.03238   -0.05193
C12A  1    0.560949    0.892419    0.726073    10.50000    0.04668    0.09208 =
         0.05593   -0.02911    0.00679   -0.04093
C13A  1    0.564246    1.048776    0.762369    10.50000    0.04519    0.11885 =
         0.10848   -0.01813    0.01873    0.01364
C14A  1    0.545674    1.000000    0.708926    10.50000    0.02983    0.13615 =
         0.09689    0.00000    0.01555    0.00000
C15A  1    0.544431    0.951526    0.591011    10.50000    0.05162    0.08650 =
         0.08581   -0.00998   -0.02744    0.00249
C16A  1    0.597071    1.000000    0.823207    10.50000    0.05092    0.16337 =
         0.06375    0.00000    0.02332    0.00000
C17A  1    0.619853    0.912140    0.837767    10.50000    0.06152    0.09703 =
         0.03272   -0.01512    0.01788   -0.04168
C18A  1    0.673595    0.916161    0.878045    10.50000    0.06411    0.02862 =
         0.02105    0.00775   -0.00046    0.00649
C19A  1    0.714328    0.858680    0.867635    10.50000    0.10815    0.03956 =
         0.01924    0.01114   -0.00203    0.03222
C20A  1    0.690274    0.786375    0.818520    10.50000    0.11947    0.04207 =
         0.03544    0.00698    0.00840    0.03622
C21A  1    0.727085    0.749164    0.774032    10.50000    0.10521    0.06437 =
         0.08518    0.00015   -0.00653    0.05121
C22A  1    0.772074    0.772929    0.777708    10.50000    0.07783    0.06455 =
         0.06509    0.01234   -0.03367    0.02945
C23A  1    0.790969    0.841993    0.822491    10.50000    0.03484    0.07692 =
         0.06944    0.01477   -0.02941    0.00367
C24A  1    0.771186    0.885714    0.865980    10.50000    0.06586    0.08603 =
         0.04429    0.00432   -0.03361    0.01831
C25A  1    0.785364    1.000000    0.878629    10.50000    0.07992    0.14562 =
         0.05615    0.00000   -0.03652    0.00000
C26A  1    0.690070    1.000000    0.894174    10.50000    0.07615    0.10077 =
         0.03541    0.00000    0.00739    0.00000
C27A  1    0.799443    0.781867    0.710441    10.50000    0.07770    0.08098 =
         0.09061   -0.00140    0.00474    0.05262
C28A  1    0.777375    0.764843    0.655632    10.50000    0.09515    0.07357 =
         0.08785   -0.00771    0.01603    0.05281
C29A  1    0.791008    0.817809    0.597950    10.50000    0.07040    0.11467 =
         0.06160   -0.01896   -0.00253    0.05885
C30A  1    0.705968    0.817498    0.538236    10.50000    0.12255    0.12217 =
         0.09560   -0.03323    0.00356    0.03476
C31A  1    0.840253    0.897883    0.784182    10.50000    0.03877    0.12527 =
         0.11905    0.02563   -0.03029    0.03850
C32A  1    0.849236    1.000000    0.797249    10.50000    0.02442    0.17252 =
         0.12398    0.00000   -0.01141    0.00000
C33A  1    0.839849    0.846097    0.713656    10.50000    0.04638    0.09869 =
         0.08510    0.03494    0.02630    0.04794
C34A  1    0.848543    0.900972    0.653832    10.50000    0.06221    0.14560 =
         0.10182    0.04847    0.03294    0.03870
C35A  1    0.825956    0.885790    0.602018    10.50000    0.07977    0.15740 =
         0.07956   -0.00491    0.04988    0.03538
C36A  1    0.755032    0.841265    0.546371    10.50000    0.08786    0.11189 =
         0.07856   -0.01622   -0.00292    0.02782
C37A  1    0.667762    0.872050    0.501021    10.50000    0.08831    0.15064 =
         0.05196   -0.03065   -0.02129   -0.00392
C38A  1    0.618343    0.871885    0.513725    10.50000    0.08071    0.12844 =
         0.06029   -0.01888   -0.00794   -0.02679
C39A  1    0.815059    0.962752    0.543743    10.50000    0.07977    0.15740 =
         0.07956   -0.00491    0.04988    0.03538
C40A  1    0.770329    0.934619    0.511571    10.50000    0.07977    0.15740 =
         0.07956   -0.00491    0.04988    0.03538
C41A  1    0.602601    0.960145    0.504027    10.50000    0.08831    0.13713 =
         0.07056    0.00358   -0.03208   -0.02869
C42A  1    0.864274    1.000000    0.669869    10.50000    0.02442    0.17252 =
         0.12398    0.00000   -0.01141    0.00000
C43A  1    0.822831    1.051453    0.568326    10.50000    0.08799    0.18447 =
         0.12963    0.02965    0.05176    0.01757
C44A  1    0.737328    1.000000    0.488457    10.50000    0.13501    0.18300 =
         0.07450    0.00000    0.02685    0.00000
C45A  1    0.681561    0.955852    0.481444    10.50000    0.11496    0.15502 =
         0.04397   -0.02596   -0.01480   -0.02689
C46A  1    0.743015    1.039755    0.894169    10.50000    0.06985    0.10181 =
         0.04189   -0.01048   -0.01602   -0.00016
C47A  1    0.824272    1.025046    0.842105    10.50000    0.04203    0.13895 =
         0.08068    0.00978   -0.03132   -0.02304
C48A  1    0.794016    1.209883    0.648735    10.50000    0.07799    0.09403 =
         0.16212    0.01833    0.00580   -0.03017
C49A  1    0.568750    1.000000    0.538271    10.50000    0.08225    0.10162 =
         0.08515    0.00000   -0.04919    0.00000
C50A  1    0.577277    1.090879    0.561783    10.50000    0.08216    0.08143 =
         0.10415    0.02726   -0.06073   -0.00274
C51A  1    0.553996    1.098781    0.626068    10.50000    0.04679    0.08582 =
         0.11218    0.00981   -0.03077    0.00671
C52A  1    0.537389    1.000000    0.645895    10.50000    0.03492    0.10288 =
         0.11649    0.00000   -0.02639    0.00000
C53A  1    0.613965    1.148494    0.556697    10.50000    0.09517    0.10612 =
         0.08751    0.02487   -0.04501   -0.01715
C54A  1    0.649776    1.110873    0.517032    10.50000    0.12830    0.14470 =
         0.06968    0.02959   -0.02461   -0.04845
C55A  1    0.645353    1.000000    0.486260    10.50000    0.12580    0.16865 =
         0.05647    0.00000   -0.03097    0.00000
C56A  1    0.627662    1.232979    0.605226    10.50000    0.06971    0.08725 =
         0.09811    0.00531   -0.01179   -0.00207
C57A  1    0.600434    1.228843    0.675009    10.50000    0.06765    0.09150 =
         0.12996   -0.01744   -0.00598    0.01682
C58A  1    0.565206    1.157220    0.688152    10.50000    0.05417    0.07615 =
         0.12507   -0.02040    0.02489    0.02167
C59A  1    0.685156    1.246554    0.611914    10.50000    0.08440    0.08712 =
         0.08654    0.00542   -0.00669   -0.02792
C60A  1    0.719866    1.210272    0.569878    10.50000    0.10293    0.11072 =
         0.07360    0.00632    0.02933   -0.05232
C61A  1    0.698649    1.141334    0.514740    10.50000    0.14085    0.14747 =
         0.07444    0.01926    0.00153   -0.07850
C62A  1    0.741911    1.082639    0.504169    10.50000    0.11634    0.14930 =
         0.05391    0.02266    0.01054   -0.06318
C63A  1    0.834535    1.155379    0.673382    10.50000    0.03765    0.09634 =
         0.17051    0.02268    0.00702   -0.02635
C64A  1    0.757993    1.250624    0.700647    10.50000    0.06185    0.06334 =
         0.11979   -0.02506   -0.02516   -0.01834
C65A  1    0.850362    1.068864    0.626383    10.50000    0.03147    0.16637 =
         0.13602    0.02033    0.03160    0.00022
C66A  1    0.751457    1.129385    0.869108    10.50000    0.09516    0.08094 =
         0.07001   -0.00999   -0.03468   -0.02031
C67A  1    0.641069    1.070487    0.865055    10.50000    0.10239    0.11367 =
         0.06537   -0.01053    0.05578    0.00508
C68A  1    0.652738    1.149964    0.847344    10.50000    0.13170    0.13969 =
         0.11823   -0.01932    0.03641    0.01036
C69A  1    0.844742    1.122286    0.745426    10.50000    0.05168    0.13216 =
         0.13444    0.00897   -0.00422   -0.06063
C70A  1    0.806771    1.168679    0.793987    10.50000    0.09989    0.11661 =
         0.13456   -0.01135   -0.05269   -0.05710
C71A  1    0.807131    1.124498    0.836128    10.50000    0.11238    0.11995 =
         0.09874    0.00318   -0.05693   -0.05093
C72A  1    0.865558    1.028001    0.738548    10.50000    0.02442    0.17252 =
         0.12398    0.00000   -0.01141    0.00000
C73A  1    0.713497    1.231895    0.798080    10.50000    0.07167    0.10414 =
         0.11350   -0.04526   -0.00342   -0.00293
C74A  1    0.770676    1.192284    0.584256    10.50000    0.10987    0.12161 =
         0.12732    0.02652    0.03976   -0.03677
C75A  1    0.765877    1.223514    0.770720    10.50000    0.07731    0.08560 =
         0.12886   -0.02819   -0.03815   -0.02195
C76A  1    0.702971    1.267913    0.678764    10.50000    0.06903    0.07134 =
         0.10086   -0.01618   -0.03053    0.01228
C77A  1    0.573774    1.128178    0.758941    10.50000    0.05731    0.10287 =
         0.13762   -0.03575    0.02767    0.02226
C78A  1    0.615880    1.186711    0.792270    10.50000    0.08149    0.10941 =
         0.14099   -0.03183    0.02564    0.01246
C79A  1    0.705208    1.181638    0.852980    10.50000    0.09917    0.10725 =
         0.09484   -0.03534   -0.01406    0.00227
C80A  1    0.788899    1.117597    0.538143    10.50000    0.10580    0.16500 =
         0.11634    0.04369    0.04356   -0.03849
C81A  1    0.677798    1.267995    0.742199    10.50000    0.08535    0.10361 =
         0.14701   -0.03970   -0.01006    0.02496
C82A  1    0.627473    1.246144    0.738565    10.50000    0.08185    0.11265 =
         0.14679   -0.03371   -0.00692    0.03179
NI1P  3    0.518985    1.000000    0.918104    10.50000    0.02289    0.02788 =
         0.03654    0.00000   -0.01026    0.00000
N1P   2    0.520449    0.868877    0.916379    11.00000    0.02530    0.02921 =
         0.03685   -0.00221   -0.00487   -0.00145
N2P   2    0.576181    1.000000    0.990059    10.50000    0.02105    0.02981 =
         0.04068    0.00000   -0.00563    0.00000
N3P   2    0.464145    1.000000    0.843271    10.50000    0.01653    0.03932 =
         0.03535    0.00000   -0.00233    0.00000
C01P  1    0.542622    0.720804    0.939075    11.00000    0.03639    0.03334 =
         0.04586    0.00558   -0.00090    0.00287
C02P  1    0.552354    0.812403    0.955482    11.00000    0.02797    0.02808 =
         0.03922    0.00236   -0.00095   -0.00166
C03P  1    0.590309    0.840682    1.004335    11.00000    0.02357    0.03525 =
         0.03805    0.00435   -0.00095    0.00456
AFIX  43
H03P  5    0.609948    0.796211    1.029169    11.00000   -1.20000
AFIX   0
C04P  1    0.601627    0.927116    1.019487    11.00000    0.01936    0.03209 =
         0.03761    0.00114   -0.00427    0.00231
C05P  1    0.643815    0.955859    1.067761    11.00000    0.02066    0.04194 =
         0.03205    0.00306   -0.00649   -0.00024
C06P  1    0.503618    1.279309    0.887155    11.00000    0.02947    0.03971 =
         0.04524    0.00470   -0.00223   -0.00077
C07P  1    0.490076    1.187477    0.874893    11.00000    0.02442    0.02819 =
         0.04128    0.00517   -0.00417   -0.00048
C08P  1    0.452729    1.159767    0.825151    11.00000    0.02246    0.04010 =
         0.04438    0.00467   -0.00525    0.00657
AFIX  43
H08P  5    0.433661    1.204284    0.799655    11.00000   -1.20000
AFIX   0
C09P  1    0.441450    1.072914    0.810260    11.00000    0.02364    0.03042 =
         0.04049    0.00284   -0.00705    0.00272
C10P  1    0.405378    1.044655    0.754524    11.00000    0.02652    0.05310 =
         0.03529    0.00305   -0.00868    0.00372
C11P  1    0.572031    0.643649    0.971322    11.00000    0.05008    0.02717 =
         0.06087    0.00307   -0.00777   -0.00051
AFIX  23
H11A  5    0.551431    0.588464    0.961926    11.00000   -1.20000
H11B  5    0.575334    0.652463    1.020830    11.00000   -1.20000
AFIX   0
C12P  1    0.681888    0.892075    1.104499    11.00000    0.03278    0.05173 =
         0.03851    0.00475   -0.01231    0.00248
AFIX  23
H12A  5    0.662212    0.839013    1.118529    11.00000   -1.20000
H12B  5    0.697817    0.921260    1.145746    11.00000   -1.20000
AFIX   0
C13P  1    0.479804    1.356005    0.847526    11.00000    0.04279    0.02743 =
         0.06924    0.00297   -0.00869    0.00304
AFIX  23
H13A  5    0.486448    1.411633    0.873508    11.00000   -1.20000
H13B  5    0.441024    1.347479    0.841227    11.00000   -1.20000
AFIX   0
C14P  1    0.376864    1.107967    0.706124    11.00000    0.03241    0.05901 =
         0.04412    0.00617   -0.01333    0.00382
AFIX  23
H14A  5    0.361658    1.156954    0.731959    11.00000   -1.20000
H14B  5    0.347229    1.076158    0.681487    11.00000   -1.20000
AFIX   0
C15P  1    0.627114    0.632327    0.945962    11.00000    0.05310    0.04365 =
         0.07754    0.00483   -0.00082    0.01783
AFIX  33
H15A  5    0.644681    0.581172    0.968487    11.00000   -1.50000
H15B  5    0.624068    0.622264    0.897098    11.00000   -1.50000
H15C  5    0.647974    0.686272    0.956011    11.00000   -1.50000
AFIX   0
C16P  1    0.725737    0.862681    1.060746    11.00000    0.03635    0.07164 =
         0.04822    0.00761   -0.00344    0.02053
AFIX  33
H16A  5    0.749508    0.821505    1.086324    11.00000   -1.50000
H16B  5    0.710166    0.832700    1.020272    11.00000   -1.50000
H16C  5    0.745760    0.914919    1.047480    11.00000   -1.50000
AFIX   0
C17P  1    0.502145    1.365691    0.778795    11.00000    0.04523    0.04573 =
         0.07474    0.01915   -0.01125   -0.00233
AFIX  33
H17A  5    0.485393    1.416561    0.754915    11.00000   -1.50000
H17B  5    0.540434    1.375457    0.784731    11.00000   -1.50000
H17C  5    0.495004    1.311295    0.752446    11.00000   -1.50000
AFIX   0
C18P  1    0.413049    1.147861    0.654716    11.00000    0.05088    0.07064 =
         0.04350    0.01303   -0.01719    0.00689
AFIX  33
H18A  5    0.392511    1.188524    0.624490    11.00000   -1.50000
H18B  5    0.442047    1.180635    0.678718    11.00000   -1.50000
H18C  5    0.427612    1.099809    0.628228    11.00000   -1.50000
AFIX   0
C01S  1    0.694460    0.500000    0.786004    10.50000    0.04708    0.06682 =
         0.04597    0.00000   -0.00300    0.00000
AFIX  43
H01S  5    0.705904    0.500000    0.832576    10.50000   -1.20000
AFIX   0
C02S  1    0.640843    0.500000    0.766480    10.50000    0.04544    0.07548 =
         0.05819    0.00000    0.00533    0.00000
AFIX  43
H02S  5    0.615439    0.500000    0.799481    10.50000   -1.20000
AFIX   0
C03S  1    0.625045    0.500000    0.700084    10.50000    0.04881    0.12745 =
         0.06189    0.00000   -0.01885    0.00000
AFIX  43
H03S  5    0.588371    0.500000    0.686332    10.50000   -1.20000
AFIX   0
C04S  1    0.661983    0.500000    0.652159    10.50000    0.06855    0.12848 =
         0.03468    0.00000   -0.01102    0.00000
AFIX  43
H04S  5    0.650885    0.500000    0.605479    10.50000   -1.20000
AFIX   0
C05S  1    0.714136    0.500000    0.672235    10.50000    0.05251    0.08524 =
         0.04739    0.00000    0.00649    0.00000
AFIX  43
H05S  5    0.739526    0.500000    0.639218    10.50000   -1.20000
AFIX   0
C06S  1    0.730803    0.500000    0.738474    10.50000    0.04150    0.06455 =
         0.04415    0.00000    0.00304    0.00000
AFIX  43
H06S  5    0.767558    0.500000    0.751761    10.50000   -1.20000
PART   -1
AFIX  66
C07S  1    0.524532    0.612016    0.573367    10.50000    0.02205    0.09459 =
         0.13389    0.00700   -0.00200   -0.00232
AFIX  43
H07S  5    0.541859    0.598700    0.616136    10.50000   -1.20000
AFIX  65
C09S  1    0.551193    0.601408    0.515051    10.50000    0.01730    0.13303 =
         0.14544   -0.04915    0.00682   -0.02258
AFIX  43
H09S  5    0.586743    0.580843    0.517964    10.50000   -1.20000
AFIX  65
C08S  1    0.525841    0.620891    0.452473    10.50000    0.08924    0.10412 =
         0.16030   -0.05601    0.07880   -0.00605
AFIX  43
H08S  5    0.544063    0.613642    0.412616    10.50000   -1.20000
AFIX  65
C10S  1    0.473826    0.650982    0.448210    10.50000    0.16709    0.14896 =
         0.09342    0.04654    0.04458    0.10812
AFIX  43
H10S  5    0.456499    0.664298    0.405440    10.50000   -1.20000
AFIX  65
C11S  1    0.447165    0.661590    0.506525    10.50000    0.14266    0.13459 =
         0.12038    0.05908    0.03816    0.10059
AFIX  43
H11S  5    0.411615    0.682155    0.503611    10.50000   -1.20000
AFIX  65
C12S  1    0.472516    0.642107    0.569104    10.50000    0.07038    0.10552 =
         0.10983    0.01051    0.01438    0.02241
AFIX  43
H12S  5    0.454294    0.649357    0.608960    10.50000   -1.20000
AFIX   0
HKLF    4

REM  TbCN@Cs(6)-C82/NiOEP/2benzene in C2/m
REM R1 =  0.1010 for    4139 Fo > 4sig(Fo)  and  0.1473 for all    6607 data
REM    996 parameters refined using   1177 restraints

END

WGHT      0.1499     32.2039

REM Highest difference peak  1.009,  deepest hole -0.599,  1-sigma level  0.101
Q1    1   0.6298  0.9551  0.6445  11.00000  0.05    1.01
Q2    1   0.5932  0.9438  0.8100  11.00000  0.05    0.97
Q3    1   0.5229  1.0000  0.9676  10.50000  0.05    0.97
Q4    1   0.5182  0.9349  0.9151  11.00000  0.05    0.79
Q5    1   0.5068  1.0000  0.8629  10.50000  0.05    0.78
Q6    1   0.8705  1.0000  0.7232  10.50000  0.05    0.78
Q7    1   0.8532  0.9443  0.7734  11.00000  0.05    0.68
Q8    1   0.4810  1.0000  0.9181  10.50000  0.05    0.65
Q9    1   0.7038  1.0000  0.7939  10.50000  0.05    0.62
Q10   1   0.6623  0.8591  0.6986  11.00000  0.05    0.62
Q11   1   0.8300  0.8294  0.6979  11.00000  0.05    0.62
Q12   1   0.8532  1.0000  0.6360  10.50000  0.05    0.61
Q13   1   0.8299  1.1508  0.6327  11.00000  0.05    0.56
Q14   1   0.5799  1.0000  1.0367  10.50000  0.05    0.56
Q15   1   0.7731  1.0000  0.5087  10.50000  0.05    0.54
Q16   1   0.8323  0.9024  0.8179  11.00000  0.05    0.52
Q17   1   0.7069  0.9125  0.4803  11.00000  0.05    0.51
Q18   1   0.8173  0.8799  0.5763  11.00000  0.05    0.48
Q19   1   0.8114  1.0000  0.5433  10.50000  0.05    0.47
Q20   1   0.8307  1.1430  0.7616  11.00000  0.05    0.46
Q21   1   0.6344  0.8918  0.8210  11.00000  0.05    0.43
Q22   1   0.8460  1.0490  0.6005  11.00000  0.05    0.43
Q23   1   0.6836  0.9124  0.7836  11.00000  0.05    0.42
Q24   1   0.4424  1.0000  0.9027  10.50000  0.05    0.41
Q25   1   0.6631  0.7694  0.7860  11.00000  0.05    0.40
;
_shelx_res_checksum   14032

_shelx_hkl_file
;
   0   0   2   98.27    2.49
   0   0   3   14.40    1.15
   0   0   4   34.00    2.11
   0   0   5  108.05    4.24
   0   0   6    0.40    0.44
   0   0   7    2.04    0.76
   0   0   8    0.70    0.50
   0   0   9    3.88    1.21
   0   0  10    3.27    1.07
   0   0 -11    0.56    0.24
   0   0  11    0.50    0.53
   0   0  12    4.71    1.24
   0   0 -12    4.92    0.63
   0   0 -13    2.84    0.52
   0   0 -14    9.45    1.00
   0   0  14   10.38    1.10
   0   0 -15    1.04    0.41
   0   0  15    1.36    0.45
   0   0  16    0.36    0.33
   0   0 -16    0.21    0.21
   0   0 -17    0.86    0.40
   0   0  17    1.50    0.49
   0   0  18    1.40    0.35
   0   0 -18    2.37    0.60
   0   0 -19    5.67    0.89
   0   0  19    4.95    0.64
   0   0 -20    0.01    0.17
   0   0  20   -0.04    0.21
   0   0  21    0.12    0.22
   0   0  22    0.39    0.23
   0  -2   0   53.55    2.21
   0  -2  -1    4.71    0.71
   0  -2   1    4.28    0.71
   0  -2   2    5.47    0.82
   0  -2  -2    5.33    0.94
   0  -2  -3   38.23    2.52
   0   2   3   36.15    2.02
   0   2   4   27.62    1.95
   0  -2   4   28.62    2.09
   0  -2   5  103.53    4.44
   0   2   5  108.33    4.49
   0   2   6    0.11    0.42
   0  -2   6   -0.41    0.44
   0  -2   6    0.02    0.08
   0  -2   7    4.31    0.41
   0  -2   7    5.55    1.25
   0   2   7    6.89    1.40
   0  -2   8    9.50    0.69
   0  -2   8   11.93    1.84
   0  -2   9    2.75    0.39
   0  -2   9    1.70    0.75
   0   2   9    2.91    1.05
   0  -2  10    0.42    0.54
   0  -2  10    1.40    0.35
   0   2  10    1.17    0.79
   0  -2  11   18.27    2.75
   0  -2  11   16.74    1.01
   0  -2 -11   19.77    1.18
   0   2  11   21.59    2.95
   0   2 -11   18.63    1.12
   0  -2  12   19.17    2.93
   0  -2  12   15.20    1.02
   0  -2 -12   18.52    1.26
   0   2 -12   20.28    1.29
   0   2  12   21.84    2.92
   0  -2 -13    2.08    0.53
   0  -2  13    1.97    0.46
   0   2 -13    2.89    0.55
   0  -2  14    1.38    0.38
   0  -2 -14    1.42    0.45
   0   2 -14    1.46    0.49
   0   2 -15    0.52    0.31
   0  -2 -15    0.06    0.20
   0  -2  15    0.15    0.20
   0  -2  16    0.01    0.14
   0  -2 -16   -0.08    0.23
   0   2  16    0.38    0.40
   0   2 -16    0.43    0.32
   0   2 -17    2.06    0.55
   0   2  17    1.91    0.56
   0  -2 -17    1.73    0.50
   0   2 -18    4.17    0.72
   0   2  18    3.49    0.71
   0   2 -19    1.23    0.44
   0   2  19    0.86    0.37
   0   2  19    0.72    0.32
   0   2  20    0.14    0.16
   0   2 -20    0.13    0.16
   0   2 -21    0.22    0.19
   0  -2  21   -0.10    0.19
   0  -2  22    0.23    0.18
   0  -2  23    0.11    0.13
   0  -4   0   39.10    2.85
   0  -4  -1    4.96    1.06
   0  -4  -2   45.29    3.39
   0  -4  -3   45.77    3.36
   0   4   4   16.61    1.72
   0  -4   4   18.52    2.29
   0  -4  -4   19.38    2.37
   0   4   5    1.28    0.63
   0  -4  -5    0.97    0.81
   0  -4   5    0.62    0.48
   0   4   6    1.39    0.65
   0  -4   6    2.31    0.93
   0  -4   7   43.71    3.87
   0   4   7   48.04    3.56
   0   4   8    7.70    1.58
   0  -4   8    5.63    1.50
   0   4   9   15.05    2.36
   0  -4   9   11.69    2.21
   0   4 -10    5.14    0.59
   0  -4 -10    4.42    0.63
   0  -4  10    3.33    1.26
   0  -4 -11   -0.51    0.24
   0   4 -11   -0.13    0.19
   0  -4  11    0.11    0.40
   0   4  12    5.25    1.59
   0  -4  12    3.75    1.31
   0   4 -12    4.99    0.70
   0   4 -13    4.70    0.72
   0   4 -14    0.33    0.29
   0   4 -15    0.13    0.16
   0   4 -16    0.70    0.36
   0   4 -17    0.05    0.17
   0   4  17    0.55    0.53
   0   4  18    0.81    0.46
   0   4 -18    0.76    0.41
   0   4  19    0.01    0.17
   0   4 -19    0.12    0.26
   0  -4  20    0.74    0.42
   0   4 -20    0.29    0.21
   0   4 -21    0.11    0.11
   0  -4  21    0.75    0.37
   0  -4  22    0.35    0.23
   0   4 -22    0.02    0.08
   0  -6   0   32.54    3.54
   0  -6  -1   43.33    4.03
   0  -6   1   41.01    3.87
   0  -6  -2   77.45    5.21
   0  -6  -3   10.30    1.99
   0  -6  -4   20.70    2.89
   0   6   5    2.55    0.78
   0  -6  -5    3.09    1.31
   0  -6  -6   17.06    2.96
   0   6   6   19.89    2.35
   0   6   7    8.86    1.64
   0   6  -8   11.69    0.97
   0   6   8   16.11    2.29
   0   6   9   14.20    2.14
   0   6  -9   11.16    0.96
   0   6  10    4.06    1.16
   0   6 -10    3.27    0.57
   0   6 -11   -0.01    0.23
   0   6 -12   11.88    1.13
   0   6 -13    9.94    1.09
   0   6 -14    0.33    0.29
   0   6 -15    0.38    0.31
   0   6 -16    0.14    0.17
   0   6  17    1.10    0.52
   0   6 -17    0.90    0.42
   0   6  18    0.94    0.44
   0   6 -18    0.95    0.39
   0   6 -19    0.21    0.21
   0  -6  19   -0.07    0.28
   0  -6  20    0.00    0.19
   0   6 -20    0.13    0.14
   0  -6  21   -0.18    0.21
   0   6 -21    0.03    0.08
   0  -8   0  176.07    9.44
   0  -8   1    2.53    1.41
   0  -8  -1    0.79    0.75
   0  -8  -2    5.14    1.69
   0  -8   2    3.85    1.48
   0  -8  -3    1.44    1.02
   0  -8   3    3.46    1.39
   0   8  -3    2.77    0.40
   0  -8   4    1.91    1.13
   0   8  -4    0.83    0.30
   0  -8  -4    1.27    0.91
   0   8  -5   19.58    1.24
   0  -8  -5   18.88    3.53
   0   8   5   20.75    2.47
   0  -8  -6    7.89    2.29
   0   8   6    8.67    1.65
   0   8  -6    6.43    0.76
   0   8   7   11.55    1.90
   0   8  -7   10.24    0.99
   0   8  -8    0.49    0.32
   0   8  -9    0.74    0.37
   0   8 -10    0.11    0.18
   0   8 -11    1.05    0.40
   0   8 -12    4.25    0.70
   0   8 -13    8.89    1.07
   0   8 -14    2.90    0.69
   0   8 -15    0.02    0.27
   0   8 -16    4.02    0.71
   0   8 -17    2.33    0.51
   0  -8  17    1.59    0.61
   0   8  17    1.50    0.48
   0   8 -18    0.75    0.33
   0  -8  18    0.62    0.33
   0  -8  18    0.72    0.29
   0  -8  19   -0.22    0.26
   0   8 -19    0.11    0.15
   0   8 -20    0.16    0.12
   0  -8  20   -0.05    0.15
   0 -10   0    8.25    2.53
   0 -10  -1    1.49    1.31
   0 -10   1    1.45    1.34
   0 -10  -2    2.04    1.11
   0 -10   2    1.72    1.24
   0 -10   3    0.41    0.61
   0  10  -3   -0.12    0.28
   0 -10  -3    0.37    0.80
   0  10  -4    0.13    0.19
   0 -10  -4    0.61    0.90
   0 -10   4    0.27    0.71
   0 -10   5   13.91    3.22
   0  10  -5   14.95    1.32
   0 -10  -5   15.63    3.33
   0  10  -6   11.65    1.21
   0 -10   6   10.90    2.87
   0 -10  -6   11.81    2.87
   0  10  -7    1.16    0.42
   0 -10   7    0.73    0.55
   0  10  -8    0.36    0.35
   0 -10   8   -0.62    1.11
   0 -10   9   -0.02    0.84
   0  10  -9    1.06    0.44
   0  10 -10    2.14    0.62
   0  10 -11    3.91    0.80
   0  10 -12   -0.29    0.36
   0  10 -13    0.71    0.31
   0  10 -14    0.09    0.18
   0  10 -15    0.02    0.21
   0  10 -16    0.50    0.28
   0  10 -17    0.60    0.26
   0 -10  17    0.61    0.32
   0 -10  18    0.36    0.20
   0  10 -18    0.48    0.21
   0 -12   0   12.37    3.28
   0 -12   1    0.39    0.73
   0 -12  -1   -0.27    0.97
   0  12  -1   -0.19    0.38
   0 -12   2    2.86    1.58
   0 -12  -2    3.81    1.61
   0  12  -2    3.32    0.73
   0 -12  -3    4.21    1.96
   0 -12   3    1.56    1.21
   0  12  -3    2.19    0.66
   0  12  -4    1.30    0.56
   0 -12   4    1.38    1.08
   0 -12  -4    1.43    1.12
   0 -12   5    2.62    1.55
   0 -12  -5    0.40    0.94
   0  12  -5    2.09    0.65
   0 -12   6    3.81    1.65
   0  12  -6    6.04    1.08
   0  12  -7    6.63    1.07
   0  12  -8    0.54    0.45
   0  12  -9    0.68    0.52
   0  12 -10    2.37    0.63
   0  12 -11    7.00    0.98
   0  12 -12   -0.02    0.29
   0  12 -13   -0.02    0.20
   0  12 -14    0.93    0.33
   0  12 -15    0.31    0.21
   0 -12  16    1.53    0.44
   0  12 -16    0.67    0.21
   0  14   0   13.76    1.65
   0  14  -1    9.51    1.31
   0  14   1    8.65    1.37
   0  14  -2    3.07    0.78
   0  14  -3    0.09    0.38
   0  14  -4    0.83    0.52
   0  14  -5    1.18    0.59
   0  14  -6    0.37    0.36
   0  14  -7    2.83    0.75
   0  14  -8    1.52    0.56
   0  14  -9   -0.07    0.21
   0  14 -10   -0.14    0.32
   0  14 -11    0.66    0.29
   0  14 -12    0.86    0.27
   0 -14  12    2.04    0.59
   0  14 -13    0.44    0.19
   0 -14  13    1.05    0.43
   0 -14  14    0.95    0.36
   0  16   0    0.03    0.22
   0  16  -1    2.03    0.61
   0  16   1    2.33    0.63
   0  16  -2    3.90    0.79
   0  16   2    3.31    0.79
   0  16   3   -0.15    0.30
   0  16  -3    0.55    0.41
   0  16  -4    0.98    0.43
   0  16   4    0.07    0.23
   0  16  -5    0.37    0.30
   0  16   5   -0.23    0.34
   0  16   6    0.47    0.31
   0  16  -6    2.13    0.52
   0  16   7    1.75    0.50
   0 -16   7    2.31    0.44
   0  16  -7    3.38    0.59
   0 -16   8    0.23    0.21
   0  16  -8    0.00    0.14
   0  16   8   -0.17    0.23
   0 -16   9    0.10    0.11
   0  16  -9   -0.12    0.18
   0  16   9   -0.06    0.20
   0  16  10   -0.71    0.30
  -1  -1  23    0.00    0.12
  -1  -1  22    0.07    0.14
  -1   1  22    0.28    0.17
  -1   1  21    1.30    0.31
  -1  -1  21    1.95    0.54
   1   1 -20   -0.08    0.20
  -1  -1  20    0.29    0.34
  -1   1  20    0.09    0.21
   1   1 -19    3.83    0.72
   1  -1 -19    3.92    0.73
  -1   1  19    3.76    0.61
  -1   1  19    3.95    0.80
  -1  -1  18    0.42    0.19
   1   1 -18    1.13    0.38
   1  -1 -18    1.23    0.44
  -1   1  18    1.49    0.45
   1   1 -17    0.30    0.27
   1  -1 -17    0.20    0.20
  -1  -1  17    0.25    0.16
  -1   1  17    0.22    0.22
  -1   1  16    0.66    0.51
   1   1 -16    0.37    0.31
   1  -1 -16   -0.04    0.27
  -1  -1  16    0.19    0.23
   1   1 -15    0.44    0.31
   1  -1 -15    0.00    0.22
  -1  -1  15    0.55    0.29
  -1   1  15    0.74    0.53
   1   1 -14    5.80    0.77
  -1   1  14    5.59    0.93
  -1  -1  14    4.82    0.71
   1  -1 -14    4.92    0.78
  -1  -1  13    3.60    0.61
   1   1 -13    4.66    0.65
   1  -1 -13    4.41    0.64
   1   1 -12    4.68    0.63
   1  -1 -12    5.71    0.65
  -1  -1  12    5.80    0.77
  -1   1  12    4.02    1.06
  -1  -1  12    2.89    0.94
  -1  -1  11   14.86    2.20
  -1  -1  11   16.15    1.15
  -1   1  11   17.00    2.39
  -1  -1  10   14.44    2.06
  -1   1  10   18.46    2.44
  -1  -1  10   16.39    1.12
  -1   1   9   19.61    2.38
  -1  -1   9   15.39    2.01
  -1  -1   8    3.45    0.95
  -1   1   8    5.13    1.15
  -1   1   7    3.03    0.88
  -1  -1   7    2.69    0.78
  -1   1   6   93.32    4.91
  -1  -1   6   76.28    3.46
  -1  -1   5    9.36    1.08
  -1   1   5   10.33    1.50
  -1   1   4   69.30    3.33
  -1  -1   4   64.21    2.55
  -1  -1   3    1.97    0.41
  -1   1   3    2.33    0.58
  -1   1   2    8.96    0.85
   1  -1  -2    6.95    0.88
  -1  -1   2    6.75    0.63
   1  -1  -1   95.30    2.17
   1  -1   0  542.98    4.67
  -1  -1   0  530.54    4.92
  -1  -1  -1  631.21    6.74
   1  -1   1  655.53    6.47
   1  -1   2    9.95    0.94
   1   1   2   11.73    0.80
   1   1   3    3.46    0.57
   1  -1   3    2.53    0.60
   1  -1   4   66.73    3.08
   1  -1   5   75.64    3.57
   1  -1   6   91.68    4.37
   1   1   7   11.88    2.08
   1  -1   7   12.91    1.82
   1  -1   8    5.16    1.24
   1   1   8    6.54    1.49
   1  -1   9    3.05    1.07
   1   1   9    2.30    1.02
   1   1  10    6.26    1.78
   1  -1  10    6.20    1.53
  -1  -1 -11   50.13    1.82
  -1   1 -11   47.92    1.83
   1  -1  11   49.84    4.45
   1   1  11   53.65    4.62
  -1   1 -12   34.28    1.73
  -1  -1 -12   38.48    1.78
   1  -1  12   36.71    3.99
   1   1  12   40.44    4.02
  -1  -1 -13    0.16    0.25
  -1   1 -13    0.46    0.29
   1  -1  13    0.32    0.33
   1   1  13    0.07    0.42
   1  -1  13    0.66    0.45
  -1   1 -14    0.53    0.28
   1  -1  14    0.58    0.39
  -1  -1 -14    0.40    0.23
  -1   1 -15    0.90    0.38
   1  -1  15    0.53    0.24
  -1  -1 -15    0.83    0.35
   1  -1  16    0.28    0.24
  -1   1 -16    0.46    0.40
  -1  -1 -16    0.22    0.21
  -1   1 -17    0.77    0.36
   1   1  17    1.46    0.50
   1  -1  17    0.81    0.32
  -1  -1 -17    1.09    0.42
  -1   1 -18    1.53    0.53
   1   1  18    1.89    0.50
  -1  -1 -18    1.71    0.51
   1   1  19    2.65    0.49
  -1  -1 -19    3.60    0.68
  -1   1 -19    3.71    0.69
  -1   1 -20    1.31    0.40
   1   1  20    1.16    0.44
   1   1  21    0.95    0.33
   1  -1  21    0.95    0.39
  -1   1 -21    0.91    0.34
   1  -1  22   -0.10    0.15
   1   1  22   -0.06    0.08
  -1  -3  23    1.54    0.31
  -1  -3  22    0.91    0.34
   1   3 -21    0.55    0.23
  -1  -3  21    0.44    0.39
   1   3 -20    2.04    0.49
  -1  -3  20    2.15    0.72
   1   3 -19    0.51    0.29
  -1   3  19    0.12    0.18
   1   3 -18    3.33    0.67
  -1   3  18    2.88    0.64
  -1   3  17    0.93    0.47
   1   3 -17    0.46    0.37
   1   3 -16    0.34    0.32
  -1   3  16    0.46    0.54
   1   3 -15    0.18    0.28
   1  -3 -15   -0.39    0.28
   1   3 -14   -0.04    0.16
  -1  -3  14   -0.32    0.26
   1  -3 -14   -0.21    0.32
  -1  -3  13    5.81    0.62
   1   3 -13    7.06    0.86
   1  -3 -12    0.36    0.20
  -1  -3  12    0.26    0.22
   1   3 -12    0.57    0.26
  -1  -3  12    0.04    0.20
  -1  -3  11   -0.11    0.36
  -1  -3  11   -0.20    0.19
  -1   3  11    0.00    0.25
   1  -3 -11   -0.07    0.12
   1   3 -11    0.17    0.17
  -1  -3  10    0.53    0.38
  -1   3  10   -0.30    0.61
  -1  -3  10    0.11    0.13
  -1   3   9    0.44    0.53
  -1  -3   9    0.33    0.36
  -1  -3   9    0.18    0.10
  -1   3   8    0.90    0.60
  -1  -3   8    0.36    0.32
  -1  -3   8    0.26    0.15
  -1  -3   7    2.21    0.76
  -1  -3   7    1.87    0.25
  -1   3   7    2.03    0.73
  -1   3   6   23.93    2.42
  -1  -3   6   22.78    0.70
  -1  -3   6   22.60    2.29
  -1   3   5    0.21    0.34
  -1  -3   5    0.18    0.34
  -1  -3   4   73.55    3.62
  -1   3   4   70.80    3.48
   1  -3  -4   73.32    4.11
  -1  -3   3   75.69    3.57
   1  -3  -3   66.12    3.43
   1  -3  -2    2.63    0.75
   1  -3  -1  261.90    6.01
  -1  -3   0    9.43    1.17
  -1  -3  -1   59.76    3.06
   1  -3   2  146.79    4.90
  -1  -3  -2  147.74    5.01
   1  -3   3    0.20    0.29
   1   3   3    0.54    0.19
   1  -3   4  167.19    6.06
  -1  -3  -4  162.79    6.29
   1   3   4  155.21    4.58
   1  -3   5   12.75    1.94
   1   3   5   13.64    1.52
   1  -3   6   11.33    1.97
   1   3   6   11.35    1.53
   1   3   7    5.21    1.13
   1  -3   7    3.87    0.32
   1  -3   7    5.98    1.43
   1  -3   8    0.54    0.13
   1  -3   8    0.15    0.57
   1  -3   9   11.13    2.16
   1  -3   9    7.10    0.54
   1  -3  10    0.28    0.18
  -1   3 -10    0.03    0.12
  -1  -3 -10   -0.07    0.16
   1  -3  10   -0.17    0.31
   1   3  10   -0.50    0.87
  -1   3 -11    1.35    0.40
   1   3  11    1.09    0.68
   1  -3  11    1.95    1.16
   1  -3  11    1.51    0.28
  -1  -3 -11    1.03    0.33
   1  -3  12   13.77    0.87
   1   3  12   20.67    3.27
  -1  -3 -12   19.35    1.40
  -1   3 -12   18.83    1.32
   1  -3  12   20.32    3.29
   1   3  13    7.34    1.88
  -1   3 -13    6.57    0.83
   1  -3  13    5.62    1.66
  -1  -3 -13    7.85    0.94
  -1  -3 -14    4.64    0.82
  -1   3 -14    3.93    0.74
  -1   3 -15    3.35    0.70
  -1  -3 -15    3.14    0.73
  -1   3 -16    1.82    0.60
  -1  -3 -16    1.67    0.55
  -1   3 -17    4.88    0.82
   1   3  17    4.95    0.87
   1   3  18    0.71    0.39
  -1   3 -18    0.62    0.33
  -1   3 -19    0.04    0.16
   1   3  19   -0.15    0.22
  -1   3 -20   -0.19    0.22
  -1   3 -21   -0.12    0.16
   1  -3  21    0.04    0.18
   1  -3  22    0.15    0.16
  -1   3 -22    0.20    0.14
  -1  -5  22    0.01    0.13
   1   5 -21    0.13    0.11
  -1  -5  21    0.02    0.19
  -1  -5  20    1.18    0.50
   1   5 -20    0.60    0.26
   1   5 -19    0.31    0.24
  -1  -5  19    0.34    0.42
  -1   5  19    0.25    0.25
   1   5 -18    1.29    0.42
  -1   5  18    1.34    0.48
  -1   5  17    0.90    0.52
   1   5 -17    0.28    0.26
   1   5 -16    0.22    0.24
   1   5 -15    0.79    0.37
   1   5 -14    2.30    0.54
   1   5 -13    1.64    0.45
   1   5 -12    1.61    0.42
   1   5 -11    2.33    0.47
  -1  -5  11    1.03    0.82
  -1   5  10   15.31    2.47
   1   5 -10   11.92    0.94
  -1  -5   9   31.80    3.89
   1   5  -9   36.30    1.52
  -1   5   8    0.17    0.42
  -1  -5   8    0.21    0.44
  -1   5   7   35.05    3.25
  -1   5   6   11.10    1.78
   1  -5  -5   29.98    3.27
  -1   5   5   28.69    2.62
   1  -5  -4    0.13    0.41
   1  -5  -3  103.57    5.47
   1  -5  -2   34.72    3.17
  -1  -5   1   23.20    2.66
   1  -5  -1   31.26    2.81
  -1  -5   0   12.36    1.98
   1  -5   0   13.74    1.99
  -1  -5  -1    2.17    0.84
  -1  -5  -2   76.47    4.72
  -1  -5  -3   30.59    3.07
   1   5   4   21.77    1.91
  -1  -5  -4   19.08    2.90
   1  -5   4   24.08    2.92
   1   5   5    4.08    0.96
   1  -5   5    5.16    1.45
  -1  -5  -5    4.34    1.56
   1  -5   6   24.89    3.22
   1   5   6   26.04    2.45
   1   5   7    0.29    0.44
   1  -5   7    0.01    0.48
   1   5   8   17.38    2.24
   1  -5   8   12.86    2.48
   1   5   9    5.92    1.42
   1  -5   9    3.57    1.38
  -1   5  -9    4.38    0.63
  -1   5 -10    1.69    0.41
   1  -5  10    1.35    0.89
  -1   5 -11   -0.08    0.18
   1  -5  11    0.15    0.60
   1   5  12    6.30    1.83
   1  -5  12    5.79    1.79
  -1   5 -12    7.50    0.90
  -1   5 -13    5.05    0.80
   1  -5  13    3.20    1.29
   1   5  13    4.67    1.51
  -1   5 -14    3.02    0.67
  -1   5 -15    0.31    0.28
  -1   5 -16    0.57    0.32
  -1   5 -17    2.51    0.61
   1   5  18    1.38    0.49
  -1   5 -18    0.92    0.37
  -1   5 -19    0.28    0.25
  -1   5 -20    0.01    0.15
  -1   5 -21    0.01    0.11
   1  -5  21    0.36    0.27
   1  -5  22    1.05    0.34
  -1  -7  21   -0.06    0.14
   1   7 -20    0.05    0.12
  -1  -7  20   -0.03    0.17
   1   7 -19    0.44    0.22
  -1  -7  19    0.82    0.39
   1   7 -18    0.09    0.20
  -1  -7  18    0.41    0.39
  -1   7  17    3.01    0.73
   1   7 -17    2.48    0.54
   1   7 -16    0.43    0.32
  -1   7  16    1.25    0.61
   1   7 -15    2.05    0.50
   1   7 -14    0.60    0.29
   1   7 -13    2.07    0.53
   1   7 -12   12.56    1.24
   1   7 -11    5.26    0.75
   1   7 -10    1.54    0.42
  -1   7  10    1.77    0.86
  -1   7   9    0.32    0.51
   1   7  -9    0.95    0.38
   1   7  -8    0.55    0.30
  -1   7   8    0.28    0.45
   1   7  -7   22.68    1.31
  -1   7   7   26.77    3.09
  -1   7   6    0.40    0.51
   1   7  -6    0.34    0.25
   1  -7  -6   -0.08    0.48
   1  -7  -5   13.02    2.55
  -1   7   5   12.59    1.87
   1  -7  -4   11.99    2.58
   1  -7  -3    1.29    0.82
  -1  -7   3    1.28    0.90
  -1  -7   2    3.74    1.28
   1  -7  -2    3.78    1.38
  -1  -7   1   44.12    4.47
   1  -7  -1   44.04    4.41
  -1  -7   0    0.15    0.56
   1  -7   0    0.42    0.48
   1  -7   1    0.77    0.70
  -1  -7  -1    1.01    0.95
  -1  -7  -2   55.88    5.08
   1  -7   2   55.48    4.80
  -1  -7  -3   10.55    2.28
  -1  -7  -4   17.51    3.00
  -1  -7  -5   61.97    5.56
   1   7   5   59.44    3.82
   1   7   6   15.13    1.94
  -1  -7  -6   12.31    2.80
  -1   7  -6   12.41    0.93
  -1   7  -7    5.75    0.71
   1   7   7    7.01    1.35
  -1   7  -8    2.88    0.57
  -1   7  -9    1.16    0.37
  -1   7 -10    2.63    0.57
  -1   7 -11   10.74    1.14
  -1   7 -12    7.86    0.98
  -1   7 -13   11.50    1.29
  -1   7 -14    4.28    0.79
  -1   7 -15   -0.17    0.24
  -1   7 -16    0.65    0.32
  -1   7 -17    3.40    0.72
  -1   7 -18    0.44    0.28
  -1   7 -19    1.23    0.35
   1  -7  19    1.32    0.44
  -1   7 -20    0.17    0.13
   1  -7  20    0.00    0.18
   1  -7  21   -0.11    0.16
   1   9 -19    0.64    0.19
  -1  -9  19    0.62    0.25
   1   9 -18    4.12    0.57
  -1  -9  18    4.80    0.65
  -1  -9  18    3.86    0.64
   1   9 -17    7.07    0.80
  -1  -9  17    6.50    0.96
  -1   9  16    5.15    0.76
   1   9 -16    5.53    0.75
  -1  -9  16    6.03    0.96
   1   9 -15    0.75    0.35
  -1  -9  15    1.43    0.55
  -1  -9  14    1.92    0.64
   1   9 -14    1.73    0.47
   1   9 -13    1.09    0.37
   1   9 -12    0.88    0.29
   1   9 -11    3.97    0.74
   1   9 -10    2.64    0.63
   1   9  -9    4.96    0.80
   1   9  -8    0.79    0.37
   1   9  -7    1.16    0.41
   1  -9  -6   10.16    2.69
  -1   9   6   13.29    2.12
   1   9  -6   11.24    1.10
  -1  -9   6   10.78    2.65
   1  -9  -5   12.53    2.86
  -1  -9   5   14.45    3.10
   1   9  -5   12.68    1.09
  -1   9   5   15.34    2.33
   1   9  -4    0.10    0.18
   1  -9  -4    0.04    0.43
  -1  -9   4    0.48    0.74
   1   9  -3    1.17    0.34
   1  -9  -3    1.59    0.82
  -1  -9   3    3.04    1.69
  -1  -9   2    0.20    0.55
   1  -9  -2    0.56    0.74
  -1  -9   1    4.72    1.98
   1  -9  -1    7.44    2.20
  -1  -9   0    0.28    0.96
   1  -9   0    0.82    0.90
   1  -9   1    2.14    1.31
  -1  -9  -1    3.35    1.62
   1  -9   2    1.00    0.87
  -1  -9  -2    0.77    0.77
  -1  -9  -3    0.51    0.79
   1  -9   3    0.15    0.46
  -1   9  -3   -0.06    0.20
  -1   9  -4    1.59    0.42
   1   9   4    1.11    0.44
  -1  -9  -4    2.30    1.37
   1  -9   4    2.21    1.25
  -1   9  -5    1.48    0.40
   1  -9   5    1.02    0.91
  -1  -9  -5    1.54    1.15
  -1  -9  -6    1.01    0.98
  -1   9  -6    0.75    0.33
  -1   9  -7    3.26    0.66
  -1   9  -8    0.69    0.38
  -1   9  -9    0.57    0.39
  -1   9 -10    1.15    0.45
  -1   9 -11    1.04    0.42
  -1   9 -12    2.29    0.63
  -1   9 -13    7.50    1.03
  -1   9 -14    0.45    0.30
  -1   9 -15    0.30    0.28
  -1   9 -16    1.85    0.49
   1  -9  17    0.82    0.40
  -1   9 -17    1.51    0.44
   1  -9  18   -0.12    0.17
  -1   9 -18    0.48    0.25
   1  -9  18    0.38    0.26
   1  -9  19    0.05    0.14
  -1   9 -19   -0.04    0.10
  -1 -11  17    0.11    0.16
   1  11 -17    0.19    0.14
  -1 -11  16    0.62    0.35
   1  11 -16    0.40    0.19
   1  11 -15    0.26    0.19
   1  11 -14    2.73    0.58
   1  11 -13    0.34    0.23
   1  11 -12    2.01    0.54
   1  11 -11    1.73    0.51
   1  11 -10    3.02    0.71
   1  11  -9    0.74    0.41
   1  11  -8    6.48    1.01
  -1 -11   8    4.13    1.55
  -1 -11   7    3.25    1.71
   1  11  -7    2.85    0.71
   1 -11  -6    1.30    1.31
   1  11  -6    0.35    0.34
  -1 -11   6    1.20    1.20
  -1 -11   5   20.43    4.14
   1  11  -5   19.90    1.64
   1 -11  -5   18.90    3.79
   1 -11  -4    9.07    2.55
   1  11  -4    9.17    1.14
  -1 -11   4   10.14    2.87
  -1 -11   3    0.58    0.92
   1  11  -3    0.42    0.21
   1 -11  -3    0.30    0.54
  -1 -11   2    2.12    1.48
   1 -11  -2    0.87    0.65
   1  11  -2    0.66    0.30
  -1 -11   1    8.18    2.63
   1 -11  -1    9.38    2.68
   1 -11   0   35.52    5.11
  -1 -11   0   33.41    4.98
  -1 -11  -1   30.47    4.60
   1 -11   1   24.82    4.40
   1 -11   2    1.14    1.05
  -1  11  -2    0.82    0.32
  -1 -11  -2    2.71    1.35
   1 -11   3   -0.25    0.76
  -1  11  -3   -0.06    0.28
  -1 -11  -3    0.55    0.76
   1 -11   4    7.42    2.59
  -1 -11  -4    5.87    2.29
  -1  11  -4    7.33    1.03
  -1 -11  -5    0.91    1.01
  -1  11  -5    0.68    0.42
   1 -11   5    0.37    1.06
   1 -11   6    3.10    1.66
  -1  11  -6    4.29    0.86
  -1  11  -7    5.45    0.95
   1 -11   7    4.06    1.85
   1 -11   8    0.14    1.16
  -1  11  -8    1.64    0.58
  -1  11  -9    0.65    0.45
  -1  11 -10    5.09    0.96
  -1  11 -11   -0.10    0.27
  -1  11 -12    0.11    0.26
  -1  11 -13    0.59    0.26
  -1  11 -14    0.54    0.36
  -1  11 -15    0.27    0.20
  -1  11 -16    0.19    0.13
   1 -11  17    0.21    0.20
  -1  11 -17    0.19    0.13
  -1 -13  15    0.06    0.18
   1  13 -15   -0.02    0.08
  -1 -13  14    1.16    0.48
   1  13 -14    0.81    0.26
   1  13 -13    2.92    0.53
  -1 -13  13    3.73    0.84
   1  13 -12    1.70    0.41
   1  13 -11    2.54    0.52
   1  13 -10    4.52    0.80
   1  13  -9    1.34    0.53
   1  13  -8    0.82    0.43
   1  13  -7    0.25    0.42
   1  13  -6    4.00    0.87
   1  13  -5    0.39    0.42
   1  13  -4    0.55    0.42
   1  13  -3    0.16    0.38
   1  13  -2   -0.15    0.27
   1  13  -1   -0.23    0.36
   1  13   0    1.07    0.43
  -1  13   0    0.90    0.42
  -1  13  -1    0.90    0.39
  -1  13  -2    0.60    0.41
  -1  13  -3    0.29    0.34
  -1  13  -4    0.29    0.42
  -1  13  -5    1.09    0.60
  -1  13  -6    0.38    0.43
  -1  13  -7    1.01    0.58
  -1  13  -8    2.22    0.70
  -1  13  -9   -0.10    0.26
  -1  13 -10    0.30    0.26
  -1  13 -11    6.17    0.89
  -1  13 -12    1.67    0.44
  -1  13 -13   -0.15    0.18
  -1  13 -14   -0.01    0.13
   1 -13  15    2.85    0.57
  -1  13 -15    1.69    0.33
  -1 -15  12    0.93    0.35
   1  15 -11    0.45    0.19
  -1 -15  11    1.39    0.45
   1  15 -10   -0.03    0.18
  -1 -15  10    0.81    0.39
  -1 -15   9    0.36    0.32
   1  15  -9   -0.11    0.23
  -1 -15   8    0.05    0.23
   1  15  -8    0.00    0.17
  -1 -15   7    0.56    0.32
   1  15  -7    1.78    0.52
   1  15  -6    0.69    0.40
  -1 -15   6   -0.23    0.33
  -1 -15   5   -0.15    0.30
   1  15  -5    0.32    0.31
   1  15  -4    1.19    0.57
  -1  15   4    1.18    0.46
  -1  15   3    2.28    0.61
   1  15  -3    2.94    0.73
  -1  15   2    2.13    0.72
   1  15  -2    1.88    0.59
   1  15  -1    8.49    1.20
  -1  15   1    8.11    1.30
  -1  15   0   -0.08    0.28
   1  15   0    0.36    0.45
  -1  15  -1    0.73    0.41
   1  15   1   -0.20    0.37
   1  15   2    4.41    0.83
  -1  15  -2    3.91    0.84
  -1  15  -3    0.59    0.40
   1  15   3    0.76    0.35
  -1  15  -4    2.51    0.75
   1 -15   5    3.60    0.67
  -1  15  -5    4.41    0.87
   1 -15   6    1.12    0.37
  -1  15  -6    2.62    0.66
   1 -15   7    1.03    0.41
  -1  15  -7    2.70    0.65
   1 -15   8    1.20    0.48
  -1  15  -8    1.03    0.42
  -1  15  -9    0.02    0.28
   1 -15   9    0.82    0.41
  -1  15 -10   -0.04    0.19
   1 -15  10    1.06    0.43
   1 -15  11    1.99    0.51
  -1  15 -11    1.05    0.29
  -1  15 -12    0.04    0.12
   1 -15  12    0.33    0.23
  -1  17   6    1.56    0.37
   1  17  -6    1.84    0.34
  -1  17   5    0.18    0.21
   1  17  -5    0.26    0.23
   1  17  -4    0.26    0.20
  -1  17   4   -0.12    0.19
   1  17  -3    1.91    0.47
  -1  17   3    2.02    0.54
   1  17  -2    1.58    0.42
  -1  17   2    2.01    0.62
   1  17  -1    9.80    1.04
  -1  17   1    9.74    1.10
  -1  17   0    3.48    0.66
   1  17   0    3.81    0.69
  -1  17  -1    1.06    0.40
   1  17   1    0.57    0.38
   1  17   2    3.37    0.62
  -1  17  -2    2.82    0.56
   1  17   3    0.88    0.42
  -1  17  -3    0.54    0.30
  -1  17  -4    1.56    0.41
   1  17   4    1.70    0.44
  -1  17  -5    0.06    0.18
   1  17   5    0.04    0.17
   1  17   6    1.08    0.32
  -1  17  -6    1.31    0.33
  -2   0  22    0.61    0.25
  -2   0  21    1.53    0.48
  -2   0  20    0.12    0.33
   2   0 -19    1.44    0.44
  -2   0  19    2.12    0.66
  -2   0  19    1.73    0.40
   2   0 -18    0.17    0.16
  -2   0  18    0.05    0.22
  -2   0  17    0.10    0.34
   2   0 -17    0.44    0.29
  -2   0  16    0.72    0.35
   2   0 -16    0.70    0.35
   2   0 -15    1.48    0.43
  -2   0  15    2.18    0.57
  -2   0  14    3.81    0.69
   2   0 -14    3.33    0.60
   2   0 -13   31.24    1.53
  -2   0  13   27.67    1.71
  -2   0  12   12.12    1.13
   2   0 -12   11.46    0.87
  -2   0  11    6.38    1.22
  -2   0  11    7.78    0.91
  -2   0  10    1.38    0.66
  -2   0   9    2.47    0.76
  -2   0   8   40.99    2.73
  -2   0   7    3.27    0.77
  -2   0   6    0.63    0.35
  -2   0   5    0.14    0.21
  -2   0   5   -0.62    0.68
  -2   0   4   42.40    2.79
  -2   0   4   32.29    1.47
  -2   0   3    1.64    0.47
  -2   0   3    1.31    0.21
  -2   0   2  242.23    4.65
  -2   0   1    4.28    0.49
   2   0   0   71.98    1.78
   2   0   1  780.93    7.73
   2   0   2   44.69    2.25
   2   0   3    5.12    0.87
   2   0   4    0.22    0.34
   2   0   5  179.61    6.46
   2   0   6   30.96    2.89
   2   0   7    7.86    1.56
   2   0   8    3.42    1.05
   2   0   9   -0.02    0.44
   2   0  10    1.13    0.80
   2   0  11   17.87    2.69
  -2   0 -11   19.47    1.18
   2   0  12    7.87    1.98
  -2   0 -12    8.84    0.89
   2   0  13    2.16    1.10
  -2   0 -13    2.85    0.57
  -2   0 -14    2.85    0.57
   2   0  14    2.60    1.01
   2   0  15    1.25    0.53
  -2   0 -15   -0.09    0.18
  -2   0 -16    0.09    0.28
   2   0  16    0.48    0.41
  -2   0 -17    8.57    1.11
   2   0  17    6.96    0.83
   2   0  18    8.26    0.84
  -2   0 -18   11.50    1.26
  -2   0 -19    0.56    0.31
  -2   0 -20    2.10    0.51
   2   0  21    2.21    0.50
   2   0  22    0.50    0.22
  -2  -2  23   -0.09    0.16
  -2  -2  22    0.25    0.21
   2   2 -21    1.40    0.32
  -2  -2  21    1.24    0.45
   2   2 -20    0.13    0.16
  -2  -2  20    0.30    0.26
  -2   2  20    0.25    0.15
   2   2 -19    3.86    0.64
  -2  -2  19    2.35    0.83
  -2   2  19    3.03    0.60
  -2   2  19    2.83    0.55
  -2   2  18    8.05    1.08
  -2   2  18    8.10    1.12
   2   2 -18    8.70    0.99
   2   2 -17    0.15    0.20
  -2  -2  17   -0.28    0.26
   2  -2 -17   -0.21    0.27
   2   2 -16    0.89    0.35
  -2   2  16    1.19    0.46
   2  -2 -16    0.79    0.34
  -2  -2  16    0.49    0.23
   2   2 -15    2.43    0.60
  -2   2  15    2.99    0.76
   2  -2 -15    2.30    0.55
  -2  -2  15    1.52    0.31
  -2  -2  14    0.17    0.21
   2  -2 -14    0.39    0.24
   2   2 -14    0.91    0.34
   2   2 -13   19.30    1.26
   2  -2 -13   19.47    1.33
   2   2 -12    0.17    0.20
  -2  -2  12    0.05    0.23
   2  -2 -12    0.04    0.15
  -2  -2  11    4.10    0.55
   2  -2 -11    4.12    0.52
  -2   2  11    4.02    1.08
  -2  -2  11    4.28    1.23
  -2  -2  10    2.95    0.44
  -2  -2  10    2.77    0.95
  -2   2  10    3.95    1.17
  -2  -2   9    0.68    0.25
  -2  -2   9    1.07    0.63
  -2   2   9    0.42    0.35
  -2   2   8   21.05    2.79
  -2  -2   8   18.87    2.13
  -2  -2   8   16.00    0.89
  -2   2   7    0.81    0.74
  -2  -2   7    0.78    0.37
  -2  -2   7    0.53    0.17
  -2  -2   6    0.21    0.13
  -2  -2   6    0.17    0.20
  -2   2   6    0.52    0.59
  -2   2   5  145.74    5.62
  -2  -2   5  137.00    4.30
  -2   2   4    6.11    1.14
  -2  -2   4    5.40    0.80
   2  -2  -3   46.80    2.51
  -2   2   3   45.79    2.54
   2  -2  -2   37.09    1.87
   2  -2  -1    0.50    0.22
   2  -2   0   11.19    1.07
  -2  -2   0   12.40    1.15
   2  -2   1   63.72    2.66
  -2  -2  -1   55.77    2.52
  -2  -2  -2   26.72    1.99
   2   2   2   25.71    1.07
   2  -2   2   26.74    1.95
   2   2   3    0.08    0.19
   2  -2   3    0.23    0.33
   2   2   4    9.19    1.03
   2  -2   4    5.68    1.13
   2  -2   5   12.71    1.76
   2  -2   6   39.53    3.23
   2  -2   7    5.39    1.36
   2  -2   8   22.90    2.82
   2   2   9    0.39    0.41
   2  -2   9    0.58    0.42
   2   2  10    1.42    0.75
   2  -2  10    1.17    0.75
   2  -2  11   10.28    2.20
   2   2  11   12.04    2.51
  -2   2 -11   11.01    0.92
   2  -2  11   11.24    0.83
  -2  -2 -11   12.17    0.98
  -2   2 -12   23.10    1.44
   2  -2  12   19.15    1.14
  -2  -2 -12   21.80    1.48
   2  -2  12   21.10    3.32
   2   2  12   25.63    3.58
   2  -2  13   11.06    0.90
   2   2  13   16.55    2.82
  -2   2 -13   12.84    1.23
  -2  -2 -13   14.75    1.29
   2  -2  13   14.51    2.83
   2   2  14   10.47    2.10
  -2  -2 -14    9.34    1.12
   2  -2  14   10.26    2.26
   2  -2  14    7.23    0.74
  -2   2 -14   10.40    1.07
  -2  -2 -15    0.77    0.30
  -2   2 -15    0.91    0.43
  -2  -2 -16    3.25    0.69
  -2   2 -16    4.10    0.77
  -2   2 -17    2.69    0.63
   2   2  17    3.10    0.70
  -2  -2 -17    2.88    0.67
  -2   2 -18    3.17    0.70
   2   2  18    2.69    0.58
  -2  -2 -18    3.42    0.68
   2   2  19    2.66    0.51
  -2   2 -19    3.41    0.71
   2   2  20    0.25    0.23
  -2   2 -20   -0.10    0.24
   2  -2  21    1.03    0.38
  -2   2 -21    0.63    0.26
   2  -2  22    0.13    0.17
  -2   2 -22    0.10    0.13
  -2  -4  22   -0.12    0.19
  -2  -4  21    0.08    0.23
   2   4 -21   -0.05    0.12
   2   4 -20    0.15    0.17
  -2  -4  20    0.05    0.31
  -2   4  19    0.01    0.25
   2   4 -19    0.09    0.15
  -2  -4  19    0.18    0.33
  -2   4  18    6.94    0.97
   2   4 -18    8.30    0.97
   2   4 -17    0.88    0.35
  -2   4  17    1.11    0.49
  -2   4  16    3.80    0.90
   2   4 -16    3.25    0.68
   2   4 -15    0.74    0.34
   2   4 -14    1.84    0.45
   2   4 -13    0.01    0.12
   2   4 -12    0.15    0.14
   2   4 -11    0.83    0.28
  -2   4  11    0.33    0.31
  -2  -4  11   -0.06    0.28
   2   4 -10    4.18    0.50
  -2  -4  10    2.91    1.03
  -2   4   9    0.42    0.67
  -2  -4   9    0.02    0.26
  -2  -4   8   11.88    2.03
  -2   4   8   15.73    2.42
  -2   4   7    0.38    0.52
  -2  -4   7    0.57    0.56
  -2   4   6   39.10    3.32
   2  -4  -5    2.68    1.12
  -2   4   5    2.60    0.91
   2  -4  -4   15.49    2.05
   2  -4  -3    7.55    1.39
   2  -4  -2  141.54    5.32
   2  -4  -1    5.31    1.07
  -2  -4   1    4.60    0.95
   2  -4   0   71.45    3.68
  -2  -4   0   69.13    3.83
  -2  -4  -1  269.10    7.68
  -2  -4  -2    5.58    1.22
   2  -4   2    5.48    1.29
   2  -4   3    6.34    1.43
  -2  -4  -3    7.62    1.55
  -2  -4  -4    1.13    0.74
   2   4   4    0.94    0.39
   2  -4   4    0.94    0.69
   2   4   5  177.10    5.25
   2  -4   5  199.00    7.92
   2  -4   6    0.52    0.64
   2   4   6    0.44    0.41
   2   4   7    1.11    0.53
   2  -4   7    1.02    0.86
   2  -4   8    0.41    0.51
   2  -4   9   51.53    4.91
   2  -4  10    1.25    0.97
  -2  -4 -10    0.48    0.21
  -2   4 -10    0.76    0.24
   2   4  11    4.06    1.51
  -2   4 -11    4.30    0.64
  -2  -4 -11    3.89    0.65
   2  -4  11    2.72    1.24
   2   4  12    2.24    1.19
  -2  -4 -12    1.62    0.45
  -2   4 -12    2.15    0.50
   2  -4  12    2.39    1.17
  -2   4 -13    2.79    0.59
   2   4  13    2.73    1.27
  -2  -4 -13    2.17    0.53
   2  -4  13    2.15    1.10
  -2   4 -14    3.27    0.64
  -2   4 -15    2.18    0.55
  -2   4 -16    2.07    0.57
  -2   4 -17    0.39    0.34
  -2   4 -18    0.72    0.36
   2   4  18    1.19    0.48
  -2   4 -19    0.29    0.27
   2   4  19    0.54    0.31
  -2   4 -20    0.14    0.19
   2  -4  21   -0.11    0.20
  -2   4 -21   -0.17    0.11
  -2   4 -22    0.02    0.10
   2  -4  22   -0.05    0.15
  -2  -6  22    0.53    0.22
  -2  -6  21    0.04    0.16
  -2  -6  20    0.05    0.26
   2   6 -20    0.33    0.16
  -2  -6  19    0.26    0.35
   2   6 -19    0.10    0.15
  -2  -6  18    0.65    0.54
   2   6 -18    0.30    0.28
  -2   6  18    0.42    0.27
   2   6 -17    4.05    0.67
  -2   6  17    5.70    0.94
  -2   6  16    2.64    0.81
   2   6 -16    2.23    0.51
   2   6 -15    0.06    0.19
   2   6 -14    0.08    0.21
   2   6 -13    0.63    0.27
   2   6 -12    4.74    0.71
  -2   6  11    0.38    0.74
   2   6 -11    0.22    0.18
   2   6 -10    4.83    0.65
  -2   6  10    5.53    1.53
  -2   6   9    0.63    0.74
   2   6  -9    0.16    0.16
  -2   6   8   24.14    3.01
   2   6  -8   19.76    1.10
  -2   6   7    9.60    1.88
   2  -6  -6   22.88    3.18
  -2   6   6   24.66    2.76
  -2   6   5   15.84    2.13
   2  -6  -5   17.17    2.64
   2  -6  -4    1.22    0.80
   2  -6  -3    2.90    1.21
   2  -6  -2   19.68    2.57
  -2  -6   2   18.40    2.56
   2  -6  -1   57.52    4.45
  -2  -6   1   56.96    4.63
  -2  -6   0  115.43    6.44
   2  -6   0  125.74    6.42
  -2  -6  -1    3.68    1.26
   2  -6   1    3.31    1.16
  -2  -6  -2    1.78    0.95
  -2  -6  -3   42.84    4.05
  -2  -6  -4    0.27    0.45
   2   6   4   -0.06    0.40
   2   6   5    5.66    1.06
  -2  -6  -5    5.33    1.78
   2  -6   6   11.53    2.65
   2   6   6   12.88    1.60
  -2   6  -7    5.85    0.63
   2   6   7    8.32    1.38
   2  -6   7    6.18    1.93
  -2   6  -8   12.94    1.01
   2   6   8   14.82    1.90
   2  -6   8   13.38    2.72
   2  -6   9    2.34    1.18
  -2   6  -9    2.57    0.50
   2  -6  10    9.56    2.36
  -2   6 -10   10.82    1.05
  -2   6 -11    2.51    0.54
   2  -6  11    2.07    1.27
  -2   6 -12    3.57    0.69
   2  -6  12    2.54    1.54
   2   6  13    4.40    1.56
  -2   6 -13    5.82    0.87
   2  -6  13    4.68    1.50
  -2   6 -14   11.46    1.23
  -2   6 -15    0.94    0.42
  -2   6 -16    1.99    0.56
  -2   6 -17    0.77    0.34
  -2   6 -18    0.15    0.20
   2   6  18    0.57    0.39
  -2   6 -19    5.54    0.77
   2  -6  20    0.74    0.34
  -2   6 -20    0.86    0.31
   2  -6  21    0.00    0.14
  -2   6 -21    0.08    0.09
  -2  -8  20    0.41    0.21
  -2  -8  19    0.66    0.31
   2   8 -19    0.89    0.25
   2   8 -18    1.48    0.41
  -2  -8  18    1.84    0.56
   2   8 -17    7.79    0.85
  -2   8  17    7.34    0.91
  -2  -8  17    8.11    1.23
  -2  -8  17    9.67    1.17
  -2   8  16    7.76    1.06
  -2  -8  16    8.34    1.28
   2   8 -16    8.25    0.93
   2   8 -15    0.39    0.26
  -2   8  15    1.07    0.58
  -2  -8  15    0.91    0.48
   2   8 -14    1.87    0.45
   2   8 -13    1.26    0.39
   2   8 -12    9.98    1.09
   2   8 -11    3.46    0.65
   2   8 -10    1.35    0.42
  -2   8  10    1.31    0.63
   2   8  -9    0.40    0.31
  -2   8   9    0.97    0.67
  -2   8   8    1.37    0.72
   2   8  -8    2.30    0.52
  -2   8   7    1.55    0.84
   2   8  -7    1.83    0.44
   2  -8  -6   24.12    3.65
   2   8  -6   21.00    1.31
  -2   8   6   23.64    3.03
   2  -8  -5   12.17    2.60
   2   8  -5    9.47    0.84
  -2   8   5   10.29    1.93
  -2  -8   5   11.51    2.58
   2   8  -4    8.45    0.75
   2  -8  -4    8.72    2.23
  -2  -8   4    8.89    2.13
  -2  -8   3    1.59    0.87
   2  -8  -3    1.75    1.17
  -2  -8   2   24.26    3.49
   2  -8  -2   23.68    3.53
  -2  -8   1    6.16    1.93
   2  -8  -1    7.61    1.97
  -2  -8   0    0.31    0.62
   2  -8   0   -0.19    0.45
   2  -8   1   16.38    2.99
  -2  -8  -1   17.14    3.18
   2  -8   2   13.58    2.82
  -2  -8  -2   19.45    3.17
  -2  -8  -3    0.43    0.61
  -2   8  -3   -0.07    0.20
   2  -8   3   -0.38    0.85
  -2   8  -4    0.42    0.15
   2   8   4    0.28    0.31
  -2  -8  -4    0.64    0.75
  -2   8  -5    2.86    0.51
  -2  -8  -5    3.60    1.53
  -2   8  -6    0.51    0.30
  -2  -8  -6    1.23    1.13
  -2   8  -7    1.31    0.41
  -2   8  -8   12.31    1.16
  -2   8  -9    0.75    0.35
  -2   8 -10    1.56    0.51
  -2   8 -11    8.18    1.08
  -2   8 -12    1.39    0.41
  -2   8 -13   18.40    1.67
  -2   8 -14    6.66    0.99
  -2   8 -15    0.10    0.22
  -2   8 -16    0.28    0.25
  -2   8 -17   -0.03    0.17
  -2   8 -18    0.11    0.18
  -2   8 -19    0.33    0.20
   2  -8  19    0.30    0.28
   2  -8  20    0.38    0.19
  -2   8 -20    0.12    0.10
  -2 -10  18    1.93    0.40
   2  10 -18    1.29    0.25
  -2 -10  17    0.45    0.33
   2  10 -17    0.26    0.17
   2  10 -16    0.08    0.16
  -2 -10  16    0.22    0.39
   2  10 -15    0.06    0.19
  -2  10  14    2.35    0.54
   2  10 -14    1.69    0.42
   2  10 -13    1.82    0.45
   2  10 -12    0.88    0.29
   2  10 -11    2.75    0.63
  -2 -10  10    1.66    0.58
   2  10 -10    3.13    0.69
   2  10  -9    0.39    0.32
  -2 -10   9    0.59    0.49
  -2 -10   8    4.35    1.64
   2  10  -8    3.55    0.71
  -2 -10   7    1.76    0.49
   2  10  -7    2.85    0.62
   2 -10  -6    0.74    0.96
   2  10  -6    0.70    0.38
  -2  10   6    0.72    0.72
  -2 -10   6   -0.49    1.00
   2  10  -5   21.40    1.59
   2 -10  -5   23.86    3.90
  -2  10   5   24.09    3.03
  -2 -10   5   23.81    4.29
   2 -10  -4   10.12    2.59
  -2 -10   4   10.67    2.77
   2  10  -4    7.86    0.93
   2 -10  -3    3.24    1.45
   2  10  -3    2.56    0.50
  -2 -10   3    3.13    1.66
  -2 -10   2    6.85    2.24
   2 -10  -2    6.39    1.92
  -2 -10   1    1.77    1.04
   2 -10  -1    2.25    1.50
  -2 -10   0    0.35    0.77
   2 -10   0    0.39    0.48
   2 -10   1   24.16    4.05
  -2 -10  -1   24.13    4.30
  -2 -10  -2   11.46    2.93
  -2  10  -2   12.16    1.19
   2 -10   2   10.51    2.83
  -2  10  -3    1.20    0.37
  -2 -10  -3    1.94    1.20
   2 -10   3    1.16    0.87
   2 -10   4    1.36    0.83
  -2  10  -4    0.97    0.39
  -2 -10  -4    1.23    1.38
  -2 -10  -5    0.43    1.10
  -2  10  -5    0.46    0.35
   2 -10   5   -0.09    0.75
  -2  10  -6    2.07    0.60
  -2 -10  -6    0.90    0.52
   2 -10   6    1.54    1.23
  -2  10  -7    5.95    0.91
   2 -10   7    5.27    2.02
  -2  10  -8    0.80    0.42
   2 -10   8    0.31    0.48
  -2  10  -9    0.41    0.41
  -2  10 -10    1.11    0.52
  -2  10 -11    1.39    0.47
  -2  10 -12   -0.18    0.33
  -2  10 -13    1.82    0.54
  -2  10 -14    0.72    0.38
  -2  10 -15    0.97    0.36
  -2  10 -16    0.42    0.26
  -2  10 -17   -0.04    0.13
   2 -10  18    0.10    0.13
  -2  10 -18    0.11    0.14
   2  12 -16    0.23    0.14
  -2 -12  16    0.20    0.25
  -2 -12  15    0.76    0.41
   2  12 -15    0.24    0.15
   2  12 -14    0.11    0.14
  -2 -12  14    0.57    0.47
   2  12 -13    4.69    0.71
   2  12 -12    2.13    0.49
   2  12 -11    0.77    0.34
   2  12 -10    0.45    0.29
   2  12  -9    0.12    0.29
   2  12  -8    2.40    0.65
   2  12  -7    2.26    0.69
  -2 -12   6    9.96    2.66
   2  12  -6   10.37    1.27
   2 -12  -5    1.66    1.21
   2  12  -5    1.39    0.52
  -2 -12   5    1.56    1.25
   2 -12  -4    9.42    2.69
  -2 -12   4    7.88    2.45
   2  12  -4   10.61    1.28
   2  12  -3    0.53    0.32
  -2 -12   3    1.68    1.14
   2 -12  -3    0.65    0.60
   2  12  -2    6.32    1.02
  -2 -12   2    7.98    2.52
   2 -12  -2    6.83    2.14
  -2 -12   1    0.20    0.63
   2 -12  -1    0.10    0.87
   2  12  -1   -0.50    0.49
  -2 -12   0    0.87    1.02
   2 -12   0    0.77    1.08
   2 -12   1   13.96    3.33
  -2 -12  -1   14.02    3.50
  -2  12  -1   14.47    1.52
  -2 -12  -2    1.25    0.64
  -2  12  -2    1.17    0.50
   2 -12   2    1.41    0.98
  -2 -12  -3    0.94    0.74
  -2  12  -3    2.27    0.65
   2 -12   4    0.90    0.90
  -2  12  -4    0.34    0.39
  -2 -12  -4    0.71    1.18
  -2 -12  -5    3.50    1.71
  -2  12  -5    3.22    0.81
   2 -12   5    3.57    1.65
  -2  12  -6    2.77    0.80
  -2  12  -7    4.45    0.92
  -2  12  -8    0.90    0.61
  -2  12  -9   -0.12    0.30
  -2  12 -10    0.63    0.37
  -2  12 -11    0.80    0.33
  -2  12 -12    2.73    0.61
  -2  12 -13   -0.11    0.23
  -2  12 -14    0.19    0.17
  -2  12 -15    0.95    0.32
  -2  12 -16    0.97    0.30
  -2 -14  14   -0.02    0.16
   2  14 -13    2.78    0.39
  -2 -14  13    3.83    0.74
   2  14 -12    3.02    0.47
  -2 -14  12    4.01    0.80
  -2 -14  11    1.23    0.60
   2  14 -11    0.77    0.25
   2  14 -10   -0.04    0.23
  -2 -14  10    0.91    0.56
  -2 -14   9    1.65    0.71
   2  14  -9    0.69    0.34
   2  14  -8    0.35    0.34
  -2 -14   8    0.19    0.28
   2  14  -7    0.57    0.43
  -2 -14   7   -0.64    0.48
   2  14  -6    0.75    0.45
  -2 -14   6    0.73    0.32
  -2 -14   5    2.37    0.63
   2  14  -5    3.56    0.81
   2  14  -4    2.53    0.71
  -2 -14   4    2.44    0.61
   2  14  -3    0.95    0.43
   2  14  -2    0.36    0.38
  -2  14   2   -0.15    0.43
  -2  14   1    3.49    0.86
   2  14  -1    3.76    0.86
   2  14   0   10.53    1.45
  -2  14   0   10.73    1.45
  -2  14  -1    7.27    1.19
   2  14   1    6.81    1.22
  -2  14  -2    2.97    0.81
  -2  14  -3    1.12    0.61
  -2  14  -4    0.19    0.44
  -2  14  -5    0.08    0.36
  -2  14  -6    2.42    0.66
  -2  14  -7    2.18    0.66
  -2  14  -8    1.49    0.54
  -2  14  -9    0.29    0.31
  -2  14 -10   -0.15    0.26
  -2  14 -11    2.36    0.48
  -2  14 -12    1.10    0.35
   2 -14  13    1.14    0.41
  -2  14 -13    1.40    0.34
   2 -14  14    0.14    0.22
   2  16  -9   -0.41    0.20
  -2 -16   9   -0.20    0.14
  -2  16   9   -0.52    0.30
  -2  16   8   -0.28    0.28
  -2 -16   8    0.25    0.19
   2  16  -8    0.15    0.15
  -2  16   7    0.43    0.31
   2  16  -7    0.52    0.24
  -2 -16   7    0.18    0.12
  -2  16   6    3.39    0.69
   2  16  -6    4.30    0.68
  -2  16   5    0.53    0.29
   2  16  -5    0.67    0.38
  -2  16   4    0.04    0.23
   2  16  -4    0.24    0.26
   2  16  -3    1.56    0.49
  -2  16   3    1.47    0.44
  -2  16   2    0.27    0.34
   2  16  -2    0.47    0.33
   2  16  -1    3.42    0.75
  -2  16   1    3.50    0.81
  -2  16   0    3.12    0.73
   2  16   0    2.83    0.71
  -2  16  -1    0.88    0.46
   2  16   1    0.25    0.30
   2  16   2   -0.32    0.31
  -2  16  -2    0.18    0.24
   2  16   3    0.64    0.40
  -2  16  -3    0.98    0.42
   2  16   4   -0.41    0.30
  -2  16  -4    0.30    0.31
   2  16   5    0.83    0.24
  -2  16  -5    1.69    0.51
   2  16   6   -0.52    0.40
  -2  16  -6    0.19    0.25
   2 -16   7    0.18    0.15
  -2  16  -7    0.34    0.30
   2  16   7   -0.36    0.29
  -2  16  -8    2.15    0.43
   2 -16   8    1.63    0.35
   2  16   8    0.84    0.29
  -2  16  -9   -0.18    0.21
  -3  -1  23    1.10    0.25
  -3   1  22    1.77    0.34
  -3  -1  22    1.93    0.42
  -3  -1  21    0.10    0.19
  -3   1  21    0.48    0.24
  -3  -1  20    0.06    0.25
  -3   1  20   -0.06    0.19
   3   1 -20    0.09    0.13
   3   1 -19    4.21    0.66
  -3   1  19    3.88    0.76
  -3  -1  19    2.54    0.83
  -3   1  19    2.67    0.53
  -3  -1  18   -0.31    0.34
  -3  -1  18    0.36    0.48
  -3   1  18    0.10    0.34
   3  -1 -18   -0.04    0.18
   3   1 -18   -0.17    0.24
  -3   1  18   -0.10    0.29
   3   1 -17   -0.33    0.29
  -3  -1  17   -0.25    0.33
  -3   1  17    0.71    0.51
   3  -1 -17    0.10    0.15
  -3   1  17   -0.14    0.30
  -3   1  16    3.72    0.75
   3  -1 -16    4.93    0.74
  -3  -1  16    3.69    0.64
   3   1 -16    4.99    0.72
  -3   1  15    0.97    0.47
  -3  -1  15    0.61    0.20
   3   1 -15    0.70    0.30
   3  -1 -15    0.62    0.27
   3  -1 -14    0.30    0.18
  -3   1  14    0.94    0.49
  -3  -1  14    0.33    0.24
   3   1 -14    0.65    0.29
  -3  -1  13   10.06    1.04
   3  -1 -13   10.79    0.88
   3   1 -13   12.25    0.93
  -3   1  13   12.15    1.32
   3   1 -12    9.12    0.74
  -3   1  12   10.46    1.17
   3  -1 -12    8.79    0.74
  -3  -1  12    7.89    0.87
  -3  -1  11   13.04    1.01
  -3   1  10    4.76    0.91
  -3  -1  10    4.42    0.96
  -3  -1  10    4.21    0.57
  -3  -1   9   14.88    1.66
  -3  -1   9   14.08    0.90
  -3  -1   8   13.41    0.82
  -3  -1   8   14.32    1.52
  -3   1   8   15.84    1.63
  -3  -1   7   19.64    0.92
  -3   1   7   18.31    1.71
  -3  -1   7   21.05    1.71
  -3   1   7   22.95    2.84
  -3  -1   6    8.47    0.98
  -3   1   6    6.13    0.92
  -3   1   6    8.38    1.55
  -3  -1   6    7.19    0.52
  -3  -1   5   32.14    1.58
  -3  -1   5   31.90    0.95
  -3   1   5   35.82    2.91
  -3   1   4   78.68    3.83
  -3  -1   4   74.56    2.07
  -3   1   3   43.76    2.57
   3  -1  -2    3.17    0.42
  -3   1   2    2.91    0.56
  -3  -1   1    7.75    0.61
   3  -1  -1    9.82    0.58
  -3  -1   1    6.48    0.67
   3  -1  -1    8.53    0.63
   3  -1   0    1.39    0.31
  -3  -1   0    1.12    0.16
  -3  -1   0    1.87    0.37
   3  -1   1    8.87    0.90
   3  -1   2   87.11    3.22
   3  -1   3   21.84    1.88
   3  -1   4   59.22    3.42
   3  -1   5   80.69    4.37
   3   1   6    0.65    0.52
   3  -1   6    0.72    0.62
   3  -1   7   43.57    3.70
   3   1   7   56.79    4.56
   3   1   8   51.44    4.62
   3  -1   8   42.24    3.82
   3   1   9    0.41    0.47
   3  -1   9    1.43    1.00
   3  -1  10   10.98    2.20
   3   1  10   11.08    2.49
   3   1  11    0.46    0.72
  -3   1 -11    0.25    0.16
  -3  -1 -11    0.25    0.19
   3  -1  11    0.41    0.66
   3   1  12    2.96    1.33
   3  -1  12    2.56    1.20
  -3   1 -12    2.30    0.51
  -3  -1 -12    3.00    0.57
   3   1  13    8.52    2.16
  -3   1 -13    8.53    1.00
  -3  -1 -13    9.72    1.00
   3  -1  13    7.59    2.15
  -3  -1 -14   -0.01    0.19
   3  -1  14    0.45    0.36
   3   1  14    0.38    0.73
  -3   1 -14    0.12    0.22
   3  -1  14   -0.39    0.61
  -3  -1 -15    2.91    0.65
  -3   1 -15    3.28    0.65
   3  -1  15    3.07    0.57
  -3   1 -16    0.26    0.32
  -3  -1 -16   -0.02    0.20
  -3  -1 -17    4.04    0.82
   3   1  17    4.29    0.72
  -3   1 -17    4.09    0.82
   3   1  18    9.53    0.90
  -3  -1 -18   13.01    1.38
  -3   1 -18   13.33    1.34
  -3  -1 -19    0.58    0.29
  -3   1 -19    0.68    0.29
   3   1  19    1.14    0.30
  -3   1 -20   -0.13    0.30
  -3   1 -21    1.76    0.42
   3   1  21    1.31    0.34
  -3   1 -22    0.31    0.15
   3  -1  22    0.41    0.20
  -3  -3  23   -0.21    0.15
  -3  -3  22   -0.21    0.24
  -3  -3  21    0.62    0.32
   3   3 -20    0.34    0.17
  -3  -3  20    0.22    0.34
  -3   3  19    0.26    0.18
  -3  -3  19    0.80    0.54
   3   3 -19    0.52    0.22
  -3   3  18    3.98    0.76
   3   3 -18    3.73    0.66
  -3   3  17    4.22    0.69
   3   3 -17    5.34    0.80
  -3   3  17    4.92    0.88
  -3   3  16    2.98    0.72
   3   3 -16    3.91    0.69
  -3   3  16    2.85    0.65
   3   3 -15    1.58    0.47
  -3   3  15    1.01    0.41
  -3   3  15    1.85    0.73
  -3   3  14    3.83    0.66
   3   3 -14    5.31    0.73
  -3   3  14    6.65    1.11
   3   3 -13    1.49    0.34
   3  -3 -13    1.23    0.33
  -3  -3  13    0.38    0.22
   3  -3 -12   -0.19    0.22
   3   3 -12    0.11    0.15
  -3  -3  12   -0.34    0.30
  -3  -3  11    0.39    0.18
   3   3 -11    0.67    0.21
   3  -3 -11    0.71    0.23
  -3  -3  10   -0.35    0.25
  -3  -3  10    0.04    0.32
  -3   3  10   -0.41    0.54
  -3   3  10    0.32    0.57
  -3  -3   9   -0.06    0.18
  -3  -3   9    0.47    0.37
  -3   3   9    0.31    0.72
  -3  -3   8    0.81    0.24
  -3   3   8    0.48    0.68
  -3  -3   8    0.88    0.59
  -3   3   7    4.72    1.43
  -3  -3   7    2.50    0.87
  -3   3   6    8.24    1.66
  -3   3   5    4.86    1.17
   3  -3  -4   17.45    1.85
  -3   3   4   15.71    1.86
   3  -3  -3   70.76    3.29
   3  -3  -2    0.13    0.27
  -3  -3   1   23.08    1.89
   3  -3  -1   21.26    1.66
   3  -3   0  193.58    5.52
  -3  -3   0  200.28    5.53
  -3  -3  -1    4.54    0.94
   3  -3   1    2.36    0.71
  -3  -3  -2    0.05    0.31
   3  -3   2    0.02    0.25
   3   3   3   29.53    1.38
   3  -3   3   31.75    2.87
  -3  -3  -3   30.23    2.74
   3   3   4    2.68    0.51
   3  -3   4    3.09    0.97
   3   3   5    0.83    0.36
   3  -3   5    1.38    0.68
   3  -3   6    0.59    0.38
   3  -3   7    7.01    1.62
   3  -3   8    1.17    0.19
   3  -3   8    0.47    0.36
   3  -3   9   10.09    2.22
   3  -3  10    1.74    1.09
   3   3  10    1.12    0.87
  -3   3 -10    2.34    0.44
  -3  -3 -10    2.02    0.39
  -3  -3 -11    1.12    0.35
  -3   3 -11    1.33    0.39
   3   3  11    1.57    1.06
   3  -3  11    0.95    0.68
  -3   3 -12    8.27    0.94
   3   3  12    9.83    2.48
   3  -3  12    5.92    1.97
  -3  -3 -12    8.17    0.96
  -3   3 -13    7.86    0.94
   3   3  13    8.83    2.30
   3  -3  13    9.50    2.52
  -3  -3 -13    8.55    1.04
  -3   3 -14    4.35    0.75
  -3  -3 -14    3.57    0.73
   3  -3  14    4.06    1.53
   3   3  14    3.66    1.36
  -3  -3 -15    0.87    0.39
  -3   3 -15    0.83    0.40
  -3   3 -16    0.20    0.34
  -3  -3 -16   -0.21    0.34
  -3   3 -17    0.81    0.39
   3   3  18    1.52    0.51
  -3   3 -18    0.55    0.26
  -3   3 -19   -0.28    0.30
   3   3  19    0.22    0.24
  -3   3 -20    0.04    0.20
  -3   3 -21    1.61    0.39
  -3   3 -22    0.44    0.20
   3  -3  22    0.91    0.33
  -3  -5  22    0.18    0.20
  -3  -5  21   -0.03    0.16
  -3  -5  20    0.46    0.41
  -3   5  19    0.20    0.22
   3   5 -19    0.93    0.29
  -3  -5  19    0.81    0.48
   3   5 -18    0.13    0.18
  -3   5  18    0.33    0.33
   3   5 -17    5.12    0.73
  -3   5  17    5.09    0.88
  -3   5  16    5.93    1.03
   3   5 -16    5.36    0.78
  -3   5  15    1.32    0.73
   3   5 -15    0.39    0.27
   3   5 -14    5.91    0.80
   3   5 -13    0.70    0.27
   3   5 -12    0.64    0.24
  -3   5  11    0.59    0.76
   3   5 -11    0.47    0.22
   3   5 -10   -0.03    0.11
  -3   5  10    0.16    0.42
  -3   5   9    8.36    1.88
  -3   5   8    3.18    1.16
  -3   5   7    1.59    0.83
  -3   5   6    6.36    1.47
   3  -5  -5   97.81    5.55
  -3   5   5   93.71    5.22
   3  -5  -4    1.53    0.77
   3  -5  -3    8.78    1.63
   3  -5  -2   47.58    3.65
  -3  -5   2   43.05    3.44
   3  -5  -1    2.44    1.00
  -3  -5   1    2.43    0.91
   3  -5   0  254.99    7.92
  -3  -5   0  226.69    7.98
  -3  -5  -1    2.63    0.89
  -3  -5  -2   61.59    4.40
   3  -5   3    3.84    1.22
  -3  -5  -3    3.80    1.29
  -3  -5  -4   47.24    4.28
   3   5   4   42.24    2.32
   3  -5   4   44.81    4.18
   3   5   5   53.02    2.75
  -3  -5  -5   54.61    4.83
   3  -5   5   57.89    4.81
   3  -5   6    0.52    0.50
   3   5   6    0.71    0.41
   3   5   7   43.81    2.89
   3  -5   7   35.48    4.24
   3  -5   8    0.22    0.47
  -3   5  -8    0.51    0.22
  -3   5  -9    0.06    0.16
   3  -5   9   -0.42    0.96
  -3   5 -10    0.43    0.21
   3  -5  10    0.23    0.38
  -3   5 -11    4.31    0.69
   3  -5  11    3.86    1.59
   3   5  12   -0.51    0.96
  -3   5 -12    0.26    0.27
   3  -5  12    0.16    0.37
   3   5  13    1.83    1.17
  -3   5 -13    2.43    0.57
   3  -5  13    1.38    0.99
   3   5  14    2.45    1.14
   3  -5  14    1.04    0.47
  -3   5 -14    2.57    0.65
  -3   5 -15    0.11    0.27
  -3   5 -16    0.00    0.20
  -3   5 -17    0.24    0.25
  -3   5 -18    0.01    0.20
   3   5  18    0.43    0.33
  -3   5 -19    2.52    0.58
  -3   5 -20    1.49    0.39
  -3   5 -21    0.36    0.21
   3  -5  21    0.35    0.31
   3  -5  22   -0.15    0.14
  -3  -7  21    0.26    0.18
  -3  -7  20    1.57    0.47
  -3  -7  19    2.36    0.60
  -3  -7  18    0.24    0.33
   3   7 -18    0.18    0.17
   3   7 -17    2.22    0.47
  -3  -7  17    2.58    0.77
  -3   7  17    1.80    0.51
  -3  -7  17    1.99    0.54
  -3  -7  16    4.34    1.06
  -3   7  16    4.62    0.87
   3   7 -16    4.31    0.66
   3   7 -15    0.39    0.24
  -3   7  15    0.59    0.53
   3   7 -14    0.44    0.26
   3   7 -13    0.24    0.22
  -3   7  12    3.43    1.32
   3   7 -12    2.51    0.56
  -3   7  11   12.63    2.44
   3   7 -11    8.08    0.89
   3   7 -10    5.55    0.70
  -3   7  10    6.47    1.81
  -3   7   9    0.90    0.78
   3   7  -9    0.42    0.23
   3   7  -8    0.27    0.23
  -3   7   8   -0.14    0.48
   3   7  -7    1.11    0.30
  -3   7   7    0.78    0.57
  -3   7   6   37.32    3.75
   3  -7  -6   36.72    4.17
  -3   7   5   54.99    4.39
   3  -7  -5   54.60    5.06
  -3  -7   4    3.31    1.22
   3  -7  -4    2.66    1.18
   3  -7  -3    2.00    1.14
  -3  -7   3    2.26    1.20
  -3  -7   2    6.97    1.87
   3  -7  -2    6.23    1.72
  -3  -7   1   14.22    2.56
   3  -7  -1   12.85    2.26
   3  -7   0  101.78    6.55
  -3  -7   0   91.38    6.43
  -3  -7  -1   51.97    4.86
   3  -7   1   54.68    4.69
  -3  -7  -2    0.90    0.43
   3  -7   2    0.42    0.70
  -3  -7  -3    5.71    1.80
  -3  -7  -4    1.75    1.03
   3   7   4    2.10    0.60
  -3  -7  -5    0.61    0.87
  -3   7  -5    0.44    0.23
  -3   7  -6    5.45    0.66
  -3   7  -7    2.41    0.49
  -3   7  -8   13.14    1.16
   3  -7   9   14.78    3.09
  -3   7  -9   16.15    1.34
  -3   7 -10    0.03    0.16
  -3   7 -11    8.03    1.02
  -3   7 -12    3.01    0.64
   3   7  13    0.79    0.58
  -3   7 -13    1.82    0.54
  -3   7 -14    1.13    0.46
  -3   7 -15    1.20    0.41
  -3   7 -16   -0.02    0.23
  -3   7 -17    1.59    0.45
  -3   7 -18    0.15    0.20
  -3   7 -19    0.41    0.20
  -3   7 -20    0.77    0.25
   3  -7  20    0.71    0.33
   3  -7  21    0.03    0.12
  -3  -9  19    1.43    0.34
  -3  -9  18    3.14    0.52
  -3  -9  18    3.38    0.59
  -3  -9  17    3.07    0.63
   3   9 -17    3.23    0.48
  -3  -9  17    3.38    0.69
  -3  -9  16    6.98    1.09
  -3  -9  16    5.20    0.86
  -3   9  16    4.43    0.66
   3   9 -16    4.88    0.65
   3   9 -15   -0.15    0.19
  -3  -9  15   -0.10    0.17
  -3   9  14    2.79    0.65
  -3  -9  14    2.00    0.64
   3   9 -14    1.90    0.46
  -3  -9  13    0.44    0.36
   3   9 -13    0.19    0.22
  -3  -9  12    0.02    0.15
   3   9 -12   -0.12    0.30
   3   9 -11    0.85    0.35
   3   9 -10    0.37    0.34
   3   9  -9    0.24    0.24
  -3   9   9    1.01    0.86
  -3  -9   9   -0.17    0.72
  -3   9   8    0.03    0.39
  -3  -9   8   -0.04    0.94
   3   9  -8    0.67    0.39
   3   9  -7    8.52    0.94
  -3   9   7    9.90    2.11
  -3  -9   7    9.02    2.44
  -3  -9   6    0.10    0.61
  -3   9   6    0.26    0.36
   3   9  -6    0.17    0.24
   3  -9  -6    0.21    0.62
  -3  -9   5    1.52    0.98
   3  -9  -5    1.45    1.28
   3   9  -5    1.63    0.41
  -3   9   5    0.86    0.70
   3  -9  -4    2.76    1.25
  -3  -9   4    3.50    1.80
   3   9  -4    2.37    0.45
  -3  -9   3    0.61    0.76
   3  -9  -3    0.49    0.44
   3   9  -3    0.62    0.26
   3  -9  -2    3.05    1.52
  -3  -9   2    2.25    1.23
   3  -9  -1    1.78    1.26
  -3  -9   1    2.76    1.31
   3  -9   0   -0.02    0.45
  -3  -9   0    0.35    0.86
   3  -9   1    7.30    2.07
  -3  -9  -1    9.16    2.41
   3  -9   2    1.77    1.07
  -3   9  -2    2.25    0.48
  -3  -9  -2    2.01    1.25
  -3   9  -3    1.29    0.40
   3  -9   3    1.67    1.17
  -3  -9  -3    3.22    1.44
  -3  -9  -4    0.21    0.48
  -3   9  -4    0.03    0.17
   3  -9   4    0.55    0.56
  -3   9  -5    1.06    0.43
  -3  -9  -5    1.15    1.13
  -3   9  -6    0.33    0.38
  -3   9  -7    3.98    0.70
  -3   9  -8    3.47    0.73
  -3   9  -9    0.28    0.35
  -3   9 -10    4.13    0.82
  -3   9 -11    0.48    0.28
  -3   9 -12    7.49    1.10
  -3   9 -13   20.45    1.78
  -3   9 -14    8.41    1.18
  -3   9 -15    0.76    0.35
  -3   9 -16    0.27    0.24
  -3   9 -17    1.06    0.38
   3  -9  18    0.18    0.17
  -3   9 -18    0.28    0.21
  -3   9 -19    0.29    0.17
   3  -9  19    0.14    0.12
  -3 -11  17   -0.09    0.15
  -3 -11  16    0.49    0.29
   3  11 -16    0.23    0.14
   3  11 -15    0.20    0.17
  -3 -11  15    0.43    0.33
   3  11 -14    0.18    0.19
   3  11 -13    3.22    0.61
   3  11 -12   -0.21    0.32
   3  11 -11    0.44    0.21
   3  11 -10    0.13    0.21
   3  11  -9    1.46    0.51
  -3 -11   8    1.62    1.21
   3  11  -8    1.68    0.54
  -3 -11   7   13.46    3.10
   3  11  -7   14.95    1.42
   3  11  -6    0.41    0.35
   3 -11  -6   -0.39    0.49
  -3 -11   6    0.65    0.95
   3 -11  -5    0.03    0.75
  -3  11   5   -0.13    0.61
   3  11  -5   -0.01    0.19
  -3 -11   5    0.71    1.06
   3 -11  -4   22.02    4.07
  -3  11   4   22.68    3.03
  -3 -11   4   23.12    4.31
   3  11  -4   21.85    1.69
   3 -11  -3    8.54    2.48
   3  11  -3    7.58    0.97
  -3 -11   3    7.97    2.57
   3  11  -2    2.92    0.61
  -3 -11   2    3.07    1.68
   3 -11  -2    3.45    1.67
  -3 -11   1    1.71    1.39
   3 -11  -1    1.75    1.14
   3 -11   0    4.69    1.99
  -3 -11   0    4.66    2.11
  -3 -11  -1   13.45    3.15
   3 -11   1   12.39    3.01
  -3  11  -1   12.96    1.35
  -3  11  -2   15.66    1.46
  -3 -11  -2   16.63    3.53
   3 -11   2   14.79    3.37
   3 -11   3   -0.04    0.52
  -3 -11  -3    1.69    1.27
  -3  11  -3    1.16    0.44
  -3  11  -4    1.22    0.48
  -3 -11  -4    2.72    1.51
   3 -11   4    1.11    1.08
   3 -11   5    8.61    2.69
  -3 -11  -5    9.14    2.65
  -3  11  -5   10.72    1.30
   3 -11   6    0.38    0.91
  -3  11  -6    1.41    0.56
  -3  11  -7    8.73    1.17
   3 -11   7    7.19    2.40
   3 -11   8    1.91    1.42
  -3  11  -8    3.42    0.83
  -3  11  -9    4.98    0.95
  -3  11 -10   -0.29    0.34
  -3  11 -11    2.55    0.65
  -3  11 -12    2.48    0.61
  -3  11 -13    0.82    0.36
  -3  11 -14    0.07    0.25
  -3  11 -15    0.07    0.17
  -3  11 -16    0.94    0.30
  -3  11 -17   -0.21    0.18
  -3 -13  15    0.39    0.28
  -3 -13  14    0.41    0.36
   3  13 -14   -0.08    0.12
  -3 -13  13    2.97    0.77
   3  13 -13    2.05    0.40
   3  13 -12    8.36    0.88
  -3 -13  12    9.60    1.38
   3  13 -11    4.84    0.73
  -3 -13  11    6.05    1.23
  -3 -13  10    1.32    0.71
   3  13 -10   -0.01    0.24
   3  13  -9    0.84    0.44
   3  13  -8    1.33    0.52
   3  13  -7    1.47    0.53
   3  13  -6    2.64    0.70
   3  13  -5    0.43    0.32
   3  13  -4    1.03    0.45
  -3 -13   4    0.90    0.42
  -3 -13   3    0.13    0.24
   3  13  -3   -0.20    0.32
   3  13  -2   -0.21    0.41
  -3  13   1    0.18    0.39
   3  13  -1    0.41    0.36
  -3  13   0    0.33    0.29
   3  13   0    0.09    0.32
  -3  13  -1    0.66    0.53
  -3  13  -2    1.18    0.53
  -3  13  -3    0.51    0.52
  -3  13  -4    2.90    0.86
  -3  13  -5    1.28    0.72
  -3  13  -6    4.84    0.98
  -3  13  -7   14.32    1.61
  -3  13  -8    5.25    0.99
  -3  13  -9    0.21    0.28
  -3  13 -10    0.12    0.24
  -3  13 -11    0.11    0.24
  -3  13 -12    1.44    0.42
  -3  13 -13    2.42    0.51
  -3  13 -14    0.08    0.13
  -3  13 -15    0.07    0.11
  -3 -15  12    0.98    0.34
  -3 -15  11    2.29    0.56
   3  15 -11    2.12    0.33
  -3 -15  10    1.83    0.54
   3  15 -10    1.71    0.35
  -3 -15   9   -0.14    0.20
   3  15  -9   -0.03    0.17
   3  15  -8   -0.16    0.21
  -3 -15   8   -0.18    0.25
  -3 -15   7   -0.46    0.38
   3  15  -7    0.54    0.34
  -3 -15   6    4.13    0.78
   3  15  -6    5.11    0.83
  -3  15   6    4.17    0.78
  -3  15   5    7.31    1.15
  -3 -15   5    7.67    0.98
   3  15  -5    8.67    1.10
   3  15  -4    0.79    0.45
  -3  15   4    0.16    0.27
  -3  15   3   -0.01    0.34
   3  15  -3    0.17    0.28
  -3  15   2   -0.20    0.34
   3  15  -2    0.16    0.29
   3  15  -1    1.40    0.53
  -3  15   1    1.34    0.69
  -3  15   0    6.92    1.14
   3  15   0    7.06    1.15
   3  15   1    2.51    0.73
  -3  15  -1    3.24    0.81
   3  15   2    0.51    0.25
  -3  15  -2    1.77    0.63
  -3  15  -3    0.33    0.36
   3  15   3   -0.72    0.51
  -3  15  -4    0.32    0.44
  -3  15  -5    1.78    0.60
  -3  15  -6    7.42    1.10
  -3  15  -7    3.17    0.72
  -3  15  -8    0.22    0.28
  -3  15  -9    1.25    0.39
  -3  15 -10   -0.15    0.25
  -3  15 -11   -0.47    0.22
   3 -15  11    0.15    0.22
  -3  17   6    0.76    0.26
  -3  17   5    2.41    0.48
   3  17  -5    2.64    0.41
   3  17  -4    0.58    0.22
  -3  17   4    0.85    0.34
  -3  17   3    0.77    0.33
   3  17  -3    0.90    0.31
  -3  17   2    0.82    0.40
   3  17  -2    1.04    0.35
  -3  17   1    2.07    0.59
   3  17  -1    2.12    0.49
  -3  17   0    8.29    0.99
   3  17   0    8.52    0.94
   3  17   1    2.44    0.62
  -3  17  -1    2.20    0.52
   3  17   2    1.19    0.36
  -3  17  -2    0.89    0.37
  -3  17  -3    1.01    0.35
   3  17   3    0.97    0.33
   3  17   4    0.95    0.31
  -3  17  -4    1.32    0.41
   3  17   5    1.07    0.32
  -3  17  -5    1.61    0.38
   3  17   6   -0.10    0.12
  -3  17  -6    0.10    0.17
  -4   0  22    1.85    0.38
  -4   0  21    0.33    0.24
  -4   0  20    1.92    0.55
  -4   0  19    0.42    0.37
  -4   0  18    0.09    0.30
   4   0 -18    0.34    0.22
  -4   0  18    0.78    0.53
   4   0 -17    0.08    0.18
  -4   0  17    0.76    0.56
  -4   0  17    0.36    0.31
  -4   0  16    0.17    0.28
   4   0 -16   -0.02    0.17
  -4   0  15    0.05    0.31
   4   0 -15   -0.05    0.18
   4   0 -14    1.96    0.41
  -4   0  14    1.67    0.52
  -4   0  13    2.81    0.61
   4   0 -13    3.48    0.49
   4   0 -12   17.98    1.02
  -4   0  12   19.81    1.44
  -4   0  11    1.73    0.46
  -4   0  10    0.89    0.37
  -4   0   9   36.65    1.59
  -4   0   8    6.23    0.77
  -4   0   8    6.42    0.62
  -4   0   7   30.54    1.24
  -4   0   7   27.76    1.45
  -4   0   6  115.98    2.45
  -4   0   6  128.60    2.27
  -4   0   6  128.10    6.47
  -4   0   5  224.81    7.64
  -4   0   5  222.69    2.64
  -4   0   4  355.44    2.94
  -4   0   4  359.44    8.55
  -4   0   3 1000.00   12.76
  -4   0   2  141.51    4.11
   4   0  -1   45.40    1.60
  -4   0   1   52.79    2.10
   4   0   0    0.40    0.21
   4   0   1   40.32    2.22
   4   0   2   70.22    3.34
   4   0   3    0.18    0.29
   4   0   4   84.25    4.60
   4   0   5   12.16    1.99
   4   0   6    5.22    1.36
   4   0   7    2.30    0.94
   4   0   8   23.67    3.16
   4   0   9    1.16    0.75
   4   0  10    1.59    0.98
  -4   0 -10    1.56    0.34
  -4   0 -11    1.48    0.39
   4   0  11    0.44    0.42
   4   0  12    2.55    1.33
  -4   0 -12    3.15    0.58
   4   0  13    2.01    1.17
  -4   0 -13    1.66    0.49
  -4   0 -14    2.36    0.56
   4   0  14    2.18    1.13
  -4   0 -15    0.58    0.33
   4   0  15    0.08    0.38
   4   0  16    0.29    0.30
  -4   0 -16   -0.33    0.33
   4   0  17    1.51    0.36
  -4   0 -17    2.70    0.69
  -4   0 -18    4.04    0.75
  -4   0 -19   -0.13    0.33
  -4   0 -20    0.77    0.30
  -4   0 -21    1.33    0.34
   4   0  22    0.38    0.19
  -4  -2  23    0.42    0.19
  -4  -2  22    1.54    0.39
  -4  -2  21    0.61    0.31
  -4   2  20    0.08    0.13
  -4  -2  20    0.33    0.25
  -4   2  19   -0.60    0.37
  -4   2  19   -0.04    0.15
   4   2 -19   -0.28    0.25
  -4  -2  19    0.41    0.45
  -4   2  18    2.79    0.63
   4   2 -18    2.56    0.49
  -4   2  18    2.14    0.59
  -4  -2  18    2.58    0.92
   4   2 -17   14.47    1.15
  -4   2  17   14.06    1.40
  -4   2  17   13.24    1.44
  -4   2  16    1.60    0.57
   4   2 -16    2.00    0.45
  -4   2  16    2.03    0.57
   4   2 -15    0.68    0.29
  -4   2  15    0.87    0.50
  -4   2  15    0.97    0.46
   4  -2 -15    0.53    0.24
  -4  -2  15    0.04    0.34
   4   2 -14    1.22    0.37
   4  -2 -14    1.61    0.38
  -4  -2  14    0.55    0.18
  -4   2  14    1.39    0.48
   4  -2 -13   -0.04    0.18
  -4  -2  13   -0.34    0.36
   4   2 -13    0.37    0.21
  -4  -2  12    8.42    0.87
   4  -2 -12   12.04    0.89
  -4   2  12   12.28    1.43
   4   2 -12   11.55    0.82
  -4  -2  11    0.30    0.18
  -4  -2  10   18.97    1.11
  -4  -2   9   -0.12    0.19
  -4   2   9    0.13    0.82
  -4   2   9    0.01    0.21
  -4  -2   9    0.15    0.19
  -4   2   8    1.32    1.00
  -4  -2   8    1.13    0.43
  -4  -2   8    0.66    0.24
  -4   2   8    0.55    0.30
  -4  -2   7   11.68    0.73
  -4  -2   7    9.67    1.19
  -4   2   7   11.45    2.12
  -4   2   6    1.76    0.92
  -4  -2   6    1.75    0.32
  -4   2   5    4.24    1.18
  -4   2   4   35.36    2.76
  -4   2   3   20.79    1.93
   4  -2  -3   22.47    1.58
   4  -2  -2   23.36    1.42
   4  -2  -1    2.97    0.48
   4  -2  -1    2.84    0.50
  -4  -2   1    3.32    0.60
  -4  -2   0   94.50    3.22
   4  -2   0   90.47    3.26
  -4  -2  -1    0.62    0.42
   4  -2   1    0.37    0.30
   4  -2   2   14.74    1.58
  -4  -2  -2   16.99    1.74
   4  -2   3   72.28    3.85
   4  -2   4  109.48    5.18
   4  -2   5    2.36    0.84
   4  -2   6   17.85    2.37
   4  -2   7    1.60    0.90
   4   2   8    2.84    1.11
   4  -2   8    4.07    1.41
   4  -2   9    2.81    1.22
   4   2   9    3.07    1.36
  -4   2 -10    0.59    0.24
   4   2  10    0.25    0.68
  -4  -2 -10    0.65    0.27
   4  -2  10    0.25    0.63
  -4  -2 -11    8.00    0.87
   4  -2  11    7.45    2.06
  -4   2 -11    8.45    0.86
   4   2  11   10.12    2.44
  -4  -2 -12    1.30    0.40
  -4   2 -12    0.86    0.34
   4  -2  12    1.41    0.86
   4   2  12    1.56    1.08
  -4  -2 -13    4.43    0.72
  -4   2 -13    4.20    0.69
   4  -2  13    3.70    1.66
   4   2  13    5.47    1.81
   4   2  14    3.43    1.49
   4  -2  14    2.52    1.40
  -4  -2 -14    2.50    0.58
  -4   2 -14    2.39    0.60
  -4   2 -15    3.73    0.74
  -4  -2 -15    2.89    0.67
  -4   2 -16    0.43    0.34
  -4  -2 -16    0.26    0.28
  -4   2 -17    0.83    0.38
  -4  -2 -17    0.76    0.34
  -4   2 -18    0.35    0.27
   4   2  18    0.75    0.33
  -4  -2 -18   -0.05    0.37
  -4   2 -19   -0.17    0.27
   4   2  19    0.19    0.22
  -4   2 -20   -0.32    0.28
  -4   2 -21    0.14    0.16
  -4   2 -22    0.45    0.19
   4  -2  22    0.14    0.18
  -4   2 -22   -0.24    0.18
  -4  -4  22    0.18    0.22
  -4  -4  21    0.08    0.21
  -4  -4  20    0.85    0.42
  -4   4  19    0.45    0.27
  -4  -4  19    0.47    0.40
  -4   4  18    1.30    0.37
   4   4 -18    1.14    0.35
  -4  -4  18    2.34    0.80
   4   4 -17    2.54    0.53
  -4   4  17    2.45    0.65
  -4  -4  17    3.77    1.05
   4   4 -16    2.79    0.53
  -4   4  16    2.65    0.66
  -4   4  15    3.21    0.82
   4   4 -15    2.36    0.50
  -4   4  14    3.66    0.98
   4   4 -14    2.59    0.48
  -4   4  13    2.38    0.82
   4   4 -13    0.40    0.24
   4   4 -12    0.32    0.19
  -4   4  11   15.00    2.78
   4   4 -11    9.34    0.73
  -4   4  10   33.87    4.03
  -4   4   9    9.95    2.21
  -4   4   8    1.48    0.93
  -4   4   7    5.15    1.55
  -4   4   6   11.86    2.04
  -4   4   5   35.74    3.25
   4  -4  -5   34.11    2.96
   4  -4  -4    0.59    0.61
   4  -4  -3   41.52    2.93
   4  -4  -2   20.15    1.99
  -4  -4   2   19.30    2.10
  -4  -4   1   43.98    3.14
   4  -4  -1   43.92    2.82
  -4  -4   0   27.50    2.49
   4  -4   1    2.06    0.81
  -4  -4  -1    2.03    0.71
   4  -4   2    1.68    0.68
  -4  -4  -2    1.13    0.53
  -4  -4  -3   29.93    3.02
   4  -4   3   30.69    3.04
   4   4   3   27.05    1.26
  -4  -4  -4   10.86    2.01
   4  -4   4    9.01    1.93
   4   4   4    9.04    0.80
   4  -4   5   28.56    3.43
   4  -4   6   31.40    3.86
   4  -4   7    1.97    1.14
   4  -4   8    0.73    0.54
  -4   4  -9    3.60    0.52
  -4  -4  -9    3.50    0.57
   4  -4   9    3.36    1.51
  -4  -4 -10    1.07    0.32
  -4   4 -10    1.04    0.34
   4  -4  10    1.51    1.40
   4   4  11    1.14    0.87
  -4   4 -11    1.59    0.42
   4  -4  11    2.01    1.25
  -4  -4 -11    1.44    0.37
   4   4  12    0.24    0.79
  -4  -4 -12   -0.31    0.33
  -4   4 -12    0.14    0.20
   4  -4  12    0.19    0.84
  -4  -4 -13    0.90    0.36
   4   4  13    1.52    1.14
   4  -4  13    1.05    1.06
  -4   4 -13    1.27    0.42
   4  -4  14   -0.02    0.73
   4   4  14   -0.65    0.68
  -4   4 -14   -0.06    0.20
  -4   4 -15    0.15    0.26
  -4   4 -16    0.65    0.39
  -4   4 -17    3.17    0.73
  -4   4 -18    1.77    0.56
  -4   4 -19    0.06    0.20
  -4   4 -20   -0.14    0.22
  -4   4 -21   -0.10    0.18
  -4   4 -22    0.29    0.12
   4  -4  22    0.36    0.20
  -4  -6  21    0.07    0.15
  -4  -6  20    0.27    0.28
  -4  -6  19    1.18    0.49
  -4  -6  18    2.21    0.71
   4   6 -18    1.87    0.40
  -4   6  18    1.66    0.49
  -4   6  17    3.32    0.75
   4   6 -17    3.56    0.57
  -4  -6  17    4.56    1.00
   4   6 -16    7.02    0.81
  -4  -6  16    7.63    1.02
  -4   6  16    6.25    0.96
  -4  -6  16    7.53    1.36
   4   6 -15    0.19    0.19
  -4   6  15    0.88    0.51
  -4   6  14    1.64    0.72
   4   6 -14    0.67    0.30
   4   6 -13    2.22    0.47
  -4   6  12    2.25    1.15
   4   6 -12    1.08    0.32
   4   6 -11   -0.12    0.21
  -4   6  11    0.27    0.58
   4   6 -10    1.23    0.30
  -4   6  10    2.21    1.06
  -4   6   9    2.95    1.25
   4   6  -9    1.99    0.35
  -4   6   8   14.34    2.56
  -4   6   7   10.00    2.08
  -4   6   6   12.16    2.15
   4  -6  -6   12.30    2.27
   4  -6  -5   89.46    5.67
  -4   6   5   86.31    5.48
   4  -6  -4   47.39    3.97
  -4  -6   4   47.34    4.25
  -4  -6   3    5.20    1.44
   4  -6  -3    5.25    1.31
  -4  -6   2    0.91    0.72
   4  -6  -2    0.17    0.35
  -4  -6   1    4.54    1.34
   4  -6  -1    2.63    1.15
  -4  -6   0   53.06    4.42
   4  -6   0   58.37    4.23
  -4  -6  -1   82.89    5.53
  -4  -6  -2    5.75    1.54
  -4  -6  -3   11.40    2.24
  -4  -6  -4    2.84    1.24
   4  -6   4    2.66    1.28
  -4  -6  -5    2.30    1.29
   4  -6   5    1.90    1.27
   4  -6   6   12.13    2.77
   4  -6   7    3.44    1.52
  -4   6  -7    3.83    0.56
   4  -6   8    3.77    1.50
  -4   6  -8    3.50    0.59
  -4   6  -9   20.26    1.46
   4  -6   9   16.86    3.30
  -4   6 -10    2.76    0.55
   4  -6  10    2.38    1.27
  -4   6 -11   16.05    1.43
   4  -6  11   11.00    3.02
   4   6  12    5.71    2.07
  -4   6 -12    5.86    0.92
   4  -6  12    3.64    1.68
  -4   6 -13    0.98    0.42
   4   6  13    1.17    0.91
   4  -6  13   -0.88    0.79
  -4   6 -14    0.39    0.31
   4  -6  14    0.51    0.88
   4   6  14    0.67    0.30
  -4   6 -15    0.11    0.23
  -4   6 -16   -0.14    0.22
  -4   6 -17    0.56    0.35
  -4   6 -18    0.31    0.30
  -4   6 -19    1.33    0.39
  -4   6 -20    4.71    0.64
  -4   6 -21    1.16    0.26
   4  -6  21    1.78    0.43
  -4  -8  20    0.79    0.28
  -4  -8  19    1.20    0.39
  -4  -8  18    4.63    0.81
  -4  -8  17    6.41    0.90
  -4  -8  17    5.52    0.95
   4   8 -17    5.06    0.60
  -4  -8  16    2.96    0.76
   4   8 -16    2.50    0.45
  -4  -8  16    2.58    0.65
  -4   8  16    2.26    0.55
  -4  -8  15    0.53    0.43
   4   8 -15    0.17    0.21
  -4   8  15    0.18    0.31
  -4  -8  14    1.30    0.55
   4   8 -14    1.20    0.35
  -4   8  14    2.09    0.65
  -4   8  13    2.24    0.72
  -4  -8  13    1.69    0.55
   4   8 -13    1.54    0.42
  -4  -8  12    0.02    0.19
   4   8 -12   -0.04    0.20
  -4   8  12   -0.51    0.50
  -4  -8  11    0.19    0.19
   4   8 -11    0.22    0.18
  -4   8  11    1.00    0.99
  -4   8  10    1.99    0.93
  -4  -8  10    0.11    0.29
   4   8 -10    1.27    0.43
   4   8  -9    2.78    0.52
  -4   8   9    3.49    1.43
  -4   8   8    0.43    0.42
   4   8  -8    0.51    0.29
  -4   8   7    3.03    1.25
  -4  -8   7    2.94    1.33
   4   8  -7    2.37    0.46
   4   8  -6    4.57    0.58
  -4   8   6    4.04    1.41
  -4  -8   6    3.68    1.50
   4  -8  -6    3.96    1.52
   4  -8  -5    3.16    1.27
   4   8  -5    2.79    0.43
  -4  -8   5    2.11    1.00
  -4   8   5    2.27    0.99
   4   8  -4    3.33    0.49
   4  -8  -4    4.14    1.52
  -4  -8   4    4.47    1.65
  -4  -8   3    4.12    1.44
   4  -8  -3    3.13    1.32
   4  -8  -2    9.05    2.22
  -4  -8   2   11.78    2.54
   4  -8  -1   11.94    2.55
  -4  -8   1   14.52    2.79
   4  -8   0   25.15    3.46
  -4  -8   0   26.28    3.69
  -4  -8  -1   23.64    3.52
   4  -8   1   19.80    3.05
   4  -8   2   13.16    2.64
  -4  -8  -2   13.78    2.72
  -4   8  -2   11.59    0.93
  -4  -8  -3    1.85    1.17
   4  -8   3    1.33    0.97
  -4   8  -3    0.84    0.27
  -4   8  -4    0.65    0.25
  -4  -8  -4    0.71    0.83
  -4  -8  -5    0.97    0.93
  -4   8  -5    0.37    0.26
  -4   8  -6   11.43    1.13
  -4   8  -7    5.00    0.79
  -4   8  -8    2.56    0.62
  -4   8  -9    0.06    0.24
  -4   8 -10    2.58    0.62
  -4   8 -11    3.92    0.72
  -4   8 -12   12.56    1.40
  -4   8 -13    7.48    1.13
  -4   8 -14    6.57    0.99
  -4   8 -15    2.13    0.61
  -4   8 -16   -0.03    0.20
  -4   8 -17    0.28    0.23
  -4   8 -18    0.11    0.24
  -4   8 -19    0.00    0.14
   4  -8  20    0.86    0.28
  -4   8 -20    1.16    0.25
  -4 -10  18    0.86    0.25
  -4 -10  17    1.11    0.39
   4  10 -16    1.45    0.31
  -4 -10  16    1.61    0.57
  -4 -10  15    0.64    0.46
   4  10 -15    0.22    0.19
   4  10 -14    0.50    0.25
  -4  10  14    0.70    0.26
  -4  10  13    0.70    0.34
   4  10 -13   -0.06    0.20
   4  10 -12    2.89    0.58
  -4  10  12    3.20    0.60
  -4  10  11    0.78    0.47
   4  10 -11   -0.51    0.40
  -4 -10  10   -0.23    1.24
   4  10 -10    0.07    0.24
   4  10  -9    0.97    0.40
  -4 -10   9   -0.13    1.19
   4  10  -8    2.91    0.63
  -4 -10   8    2.02    0.93
  -4  10   8    3.42    1.12
  -4  10   7    7.83    1.85
   4  10  -7    6.86    0.91
  -4 -10   7    7.73    2.45
  -4  10   6    6.87    1.74
  -4 -10   6    6.66    2.10
   4  10  -6    8.39    0.97
   4 -10  -6    5.83    1.94
   4  10  -5    1.06    0.37
   4 -10  -5    0.96    0.64
  -4 -10   5    1.70    1.39
  -4  10   5    1.41    0.58
   4 -10  -4    0.97    1.08
   4  10  -4    0.50    0.27
  -4 -10   4    1.00    0.88
   4 -10  -3    6.43    2.18
  -4 -10   3    6.83    2.20
   4  10  -3    6.27    0.82
   4 -10  -2    3.92    1.77
  -4 -10   2    3.67    1.80
   4 -10  -1    9.52    2.56
  -4 -10   1    7.53    2.27
   4 -10   0    2.09    1.18
  -4 -10   0    0.78    0.85
  -4 -10  -1    1.10    0.93
  -4  10  -1    1.08    0.26
   4 -10   1    1.51    1.06
   4 -10   2   15.42    3.29
  -4 -10  -2   16.10    3.50
  -4  10  -2   15.49    1.37
  -4  10  -3   12.22    1.23
   4 -10   3   12.96    3.06
  -4 -10  -3   12.96    3.15
  -4  10  -4    2.46    0.56
   4 -10   4    1.53    0.63
  -4 -10  -4    2.11    1.44
  -4  10  -5    5.17    0.85
  -4 -10  -5    3.99    1.90
   4 -10   5    4.08    1.76
  -4  10  -6    0.44    0.35
   4 -10   6   -0.42    0.98
  -4  10  -7    3.33    0.73
   4 -10   7    2.20    1.66
  -4  10  -8    1.91    0.62
  -4  10  -9   -0.05    0.32
  -4  10 -10    0.17    0.33
  -4  10 -11    0.21    0.30
  -4  10 -12    1.22    0.50
  -4  10 -13    0.71    0.38
  -4  10 -14    0.34    0.35
  -4  10 -15    1.81    0.48
  -4  10 -16    0.21    0.21
  -4  10 -17   -0.08    0.20
  -4  10 -18    0.47    0.21
  -4 -12  16    0.26    0.27
  -4 -12  15    0.28    0.25
  -4 -12  14    1.47    0.60
   4  12 -14    1.22    0.29
  -4 -12  13    0.36    0.44
   4  12 -13    0.02    0.15
  -4 -12  12    3.45    1.05
   4  12 -12    1.84    0.45
   4  12 -11   -0.23    0.27
  -4 -12  11    1.55    0.76
   4  12 -10    1.95    0.52
   4  12  -9    0.33    0.29
   4  12  -8    0.76    0.35
   4  12  -7   15.02    1.46
   4  12  -6    1.23    0.49
   4 -12  -5    0.35    0.89
   4  12  -5    0.21    0.32
  -4 -12   5    1.35    1.26
  -4 -12   4    0.88    0.99
   4  12  -4    0.57    0.35
   4 -12  -4    0.46    0.74
   4  12  -3    3.05    0.67
  -4 -12   3    2.70    0.66
  -4 -12   3    3.51    1.87
   4 -12  -3    2.36    1.35
   4  12  -2    2.63    0.59
  -4 -12   2    2.59    0.59
  -4 -12   2    2.82    1.56
   4 -12  -2    3.78    1.65
  -4 -12   1    6.09    2.06
   4 -12  -1    7.52    2.39
  -4 -12   0   -0.43    0.98
  -4  12   0    0.12    0.24
   4 -12   0    1.07    1.10
  -4  12  -1    2.95    0.70
   4 -12   1    2.42    1.47
  -4 -12  -1    2.65    1.64
  -4 -12  -2    0.04    0.50
   4 -12   2    1.06    1.23
  -4  12  -2   -0.07    0.23
  -4  12  -3    0.30    0.40
  -4 -12  -3    0.01    0.90
   4 -12   3    0.49    1.26
  -4 -12  -4    1.52    1.36
  -4  12  -4    0.92    0.51
   4 -12   4    0.66    0.48
   4 -12   5    0.28    0.71
  -4  12  -5    0.74    0.47
  -4  12  -6    1.00    0.54
  -4  12  -7    5.00    0.98
  -4  12  -8    6.89    1.15
  -4  12  -9    1.07    0.41
  -4  12 -10   -0.03    0.39
  -4  12 -11    0.42    0.24
  -4  12 -12    1.40    0.43
  -4  12 -13    2.69    0.61
  -4  12 -14    0.25    0.19
  -4  12 -15    1.51    0.37
  -4  12 -16    0.26    0.17
  -4 -14  14    0.05    0.15
  -4 -14  13    0.83    0.38
   4  14 -12    3.56    0.44
  -4 -14  12    4.29    0.85
  -4 -14  11    2.25    0.68
   4  14 -11    1.54    0.33
   4  14 -10    0.65    0.23
  -4 -14  10    1.86    0.66
  -4 -14   9    0.67    0.45
   4  14  -9    1.44    0.42
  -4 -14   8    0.14    0.23
   4  14  -8    0.70    0.35
   4  14  -7    0.32    0.32
  -4 -14   7   -0.43    0.42
  -4 -14   6    2.40    0.65
   4  14  -6    3.94    0.80
   4  14  -5   12.36    1.33
  -4 -14   5   10.68    1.35
   4  14  -4    6.50    1.00
  -4  14   4    5.77    1.05
  -4 -14   4    5.87    0.96
   4  14  -3    0.77    0.40
  -4  14   3    0.40    0.28
   4  14  -2   -0.07    0.31
  -4  14   2   -0.37    0.47
   4  14  -1    1.21    0.49
  -4  14   1    1.08    0.55
  -4  14   0    3.59    0.87
   4  14   0    3.85    0.87
  -4  14  -1    1.36    0.58
   4  14   1    1.00    0.52
  -4  14  -2    0.69    0.49
  -4  14  -3    1.27    0.65
  -4  14  -4    1.41    0.58
  -4  14  -5    0.14    0.38
  -4  14  -6    2.43    0.70
  -4  14  -7    4.59    0.90
  -4  14  -8    2.10    0.57
  -4  14  -9   -0.09    0.25
  -4  14 -10   -0.35    0.32
  -4  14 -11   -0.12    0.23
  -4  14 -12    0.19    0.17
  -4  14 -13    3.47    0.50
  -4  16   9   -0.47    0.23
   4  16  -8    0.86    0.22
  -4  16   8    0.25    0.16
  -4 -16   8    0.55    0.21
   4  16  -7    0.24    0.22
  -4 -16   7    0.26    0.17
  -4  16   7   -0.11    0.22
  -4  16   6    0.10    0.17
   4  16  -6    0.40    0.22
  -4  16   5    3.51    0.68
   4  16  -5    4.45    0.67
  -4  16   4    0.92    0.41
   4  16  -4    0.70    0.38
  -4  16   3    0.57    0.37
   4  16  -3    0.85    0.38
   4  16  -2    0.76    0.38
  -4  16   2    0.64    0.33
   4  16  -1   -0.07    0.26
  -4  16   1    0.11    0.45
   4  16   0    3.68    0.71
  -4  16   0    3.69    0.78
  -4  16  -1    2.39    0.62
   4  16   1    2.07    0.57
  -4  16  -2    0.33    0.36
   4  16   2    0.11    0.27
   4  16   3   -0.34    0.28
  -4  16  -3    0.32    0.37
   4  16   4    0.21    0.18
  -4  16  -4    0.23    0.29
   4  16   5   -0.70    0.42
  -4  16  -5    0.20    0.25
   4  16   6    1.17    0.38
  -4  16  -6    2.00    0.52
  -4  16  -7    0.27    0.21
   4  16   7   -0.40    0.33
   4  16   8    0.03    0.18
  -4  16  -8    0.47    0.22
  -4  16  -9    0.15    0.14
  -5  -1  22    0.64    0.29
  -5   1  22    0.66    0.21
  -5   1  21    0.03    0.14
  -5  -1  21    0.01    0.20
  -5   1  20    0.44    0.31
  -5  -1  20    0.17    0.22
  -5   1  19   -0.26    0.35
  -5  -1  19    0.26    0.37
  -5   1  19    0.17    0.23
  -5   1  18    3.08    0.70
  -5  -1  18    3.72    0.93
  -5   1  18    3.15    0.64
  -5   1  17    2.01    0.56
  -5  -1  17    3.22    0.95
  -5   1  17    3.88    0.83
   5   1 -16   -0.03    0.11
  -5   1  16    0.84    0.49
  -5  -1  16    0.83    0.51
   5  -1 -16    0.22    0.13
  -5   1  16    0.19    0.27
  -5  -1  16   -0.42    0.48
  -5  -1  15    0.21    0.29
   5  -1 -15    0.60    0.23
  -5   1  15    0.89    0.52
  -5   1  15    0.59    0.24
   5   1 -15    1.05    0.34
  -5   1  14    2.96    0.71
   5  -1 -14    2.54    0.45
   5   1 -14    3.34    0.50
  -5  -1  14    1.83    0.39
  -5   1  14    2.58    0.67
  -5  -1  13    0.39    0.20
   5   1 -13    0.65    0.21
   5  -1 -13    0.71    0.24
  -5  -1  12    9.90    0.95
  -5   1  12   11.91    1.18
  -5   1  11    1.62    0.58
  -5  -1  11    1.02    0.32
  -5  -1  10   -0.24    0.27
  -5   1  10    0.90    0.46
  -5  -1   9    0.87    0.24
  -5   1   9    0.96    0.33
  -5   1   8   21.18    1.21
  -5  -1   8   25.04    1.29
  -5   1   7    0.97    0.21
  -5   1   7    1.76    0.93
  -5   1   7    1.46    0.26
  -5  -1   7    2.65    0.41
  -5   1   6   41.16    3.78
  -5  -1   6   42.68    1.35
  -5   1   6   37.18    1.34
  -5   1   5  277.28    8.68
  -5   1   5  269.43    3.14
  -5  -1   5  271.83    3.10
  -5   1   4  123.08    5.33
  -5  -1   4  113.74    5.16
  -5   1   4  123.23    1.89
  -5  -1   3   64.87    3.46
  -5   1   3   64.17    3.45
  -5   1   3   69.07    1.23
  -5   1   2    5.81    0.94
   5  -1  -2    5.55    0.50
  -5  -1   2    5.78    0.89
  -5  -1   2    7.08    0.57
  -5  -1   1  147.63    3.77
   5  -1  -1  156.91    3.40
   5  -1   0   93.85    3.00
  -5  -1   0   91.14    2.27
  -5  -1  -1   10.98    0.57
   5  -1   1   12.67    1.28
   5  -1   2   30.91    2.25
   5  -1   3  187.19    6.23
   5  -1   4   -0.12    0.41
   5  -1   5   94.44    5.33
   5  -1   6   55.98    4.38
   5   1   6   60.95    4.92
   5   1   7   36.94    4.07
   5  -1   7   32.57    3.61
   5  -1   8   23.06    3.17
   5   1   8   27.60    3.82
   5   1   9   31.57    4.02
   5  -1   9   25.68    3.51
  -5  -1 -10    8.62    0.79
   5  -1  10    8.02    2.07
  -5   1 -10    8.63    0.79
   5   1  10    8.38    2.22
  -5   1 -11    1.99    0.47
   5  -1  11    2.09    1.23
  -5  -1 -11    2.45    0.49
   5   1  11    3.21    1.57
  -5  -1 -12    3.35    0.62
  -5   1 -12    2.85    0.59
   5   1  12    3.25    1.28
   5  -1  12    2.66    1.42
  -5  -1 -13    0.41    0.30
   5   1  13    0.04    0.58
  -5   1 -13    0.19    0.26
   5  -1  13    0.28    0.68
  -5   1 -14    4.25    0.74
   5   1  14    4.10    1.62
   5  -1  14    2.58    1.22
  -5  -1 -14    4.48    0.76
   5   1  15    0.83    0.54
  -5   1 -15    1.54    0.50
   5  -1  15    1.33    1.00
  -5  -1 -15    1.10    0.44
  -5   1 -16    0.41    0.31
  -5  -1 -16    0.09    0.29
  -5  -1 -17   -0.15    0.39
   5   1  17    0.47    0.31
  -5   1 -17    0.06    0.21
  -5   1 -18    0.47    0.36
  -5  -1 -18    0.58    0.27
  -5  -1 -19    1.11    0.40
  -5  -1 -19    0.72    0.30
  -5   1 -19    0.75    0.34
  -5  -1 -20    0.61    0.26
  -5   1 -20    0.99    0.36
  -5   1 -21    0.20    0.21
  -5   1 -21    0.02    0.16
   5  -1  22    0.14    0.12
  -5   1 -22   -0.07    0.10
  -5  -3  22    0.21    0.18
  -5  -3  21    0.14    0.29
  -5  -3  20   -0.14    0.23
  -5  -3  19    0.78    0.44
  -5   3  19    0.22    0.21
  -5   3  18    1.72    0.48
  -5  -3  18    4.80    1.09
  -5  -3  17    3.57    1.04
  -5   3  17    2.27    0.58
  -5   3  17    2.37    0.52
  -5   3  16    2.12    0.49
   5   3 -16    2.27    0.45
  -5   3  16    2.42    0.68
  -5  -3  16    3.69    1.07
   5   3 -15    3.06    0.54
  -5   3  15    2.96    0.71
  -5   3  15    2.54    0.56
  -5   3  14    1.75    0.61
   5   3 -14    1.34    0.36
  -5   3  14    1.03    0.37
  -5   3  13    0.70    0.27
  -5   3  13    2.29    0.84
   5   3 -13    1.56    0.32
   5   3 -12    1.80    0.32
  -5   3  12    0.92    0.27
  -5   3  11    2.37    0.72
  -5   3  11    1.18    0.83
  -5   3  10   24.87    3.71
  -5   3   9   23.06    3.33
  -5   3   8    0.05    0.66
  -5   3   7    4.06    1.39
  -5   3   6   12.32    2.16
  -5   3   5    2.56    0.98
   5  -3  -4   28.28    2.20
  -5   3   4   30.34    2.83
   5  -3  -3   28.49    1.97
  -5   3   3   32.24    0.90
  -5  -3   2   34.71    2.36
   5  -3  -2   39.73    2.23
   5  -3  -1   64.66    2.81
   5  -3  -1   61.68    3.11
  -5  -3   1   66.49    3.26
  -5  -3   0   96.56    4.03
   5  -3   0   90.51    3.81
  -5  -3  -1    9.88    1.43
   5  -3   1    8.82    1.41
  -5  -3  -2   30.61    2.65
   5  -3   2   32.62    2.95
   5  -3   3   26.82    2.73
   5  -3   4    1.38    0.78
   5  -3   5   11.25    2.12
   5  -3   6    2.05    0.92
   5  -3   7   -0.05    0.66
   5  -3   8   37.61    4.36
  -5   3  -9    0.19    0.17
  -5  -3  -9   -0.21    0.18
   5  -3   9   -0.10    0.44
  -5  -3 -10   -0.08    0.20
  -5   3 -10    0.19    0.17
   5  -3  10   -0.06    0.78
   5   3  10   -0.31    0.81
  -5  -3 -11    4.93    0.74
   5   3  11    6.42    2.19
  -5   3 -11    5.94    0.77
   5  -3  11    5.13    1.80
   5   3  12    2.17    1.27
  -5  -3 -12    1.42    0.39
   5  -3  12    0.20    0.81
  -5   3 -12    1.76    0.46
  -5   3 -13    7.01    0.96
   5   3  13    7.31    2.19
   5  -3  13    6.72    2.16
  -5  -3 -13    6.74    0.97
  -5   3 -14    8.47    1.07
   5  -3  14    7.59    2.35
  -5  -3 -14    9.15    1.11
   5   3  14    8.94    2.26
  -5  -3 -15    1.02    0.39
   5   3  15    0.24    0.50
  -5   3 -15    1.66    0.54
  -5   3 -16    7.46    1.10
  -5  -3 -16    8.58    1.22
  -5   3 -17    1.90    0.57
  -5   3 -18    5.91    0.93
  -5   3 -19    0.34    0.23
  -5   3 -20   -0.01    0.17
  -5   3 -21    0.10    0.15
  -5   3 -22    0.44    0.17
   5  -3  22    0.60    0.23
  -5   3 -22    0.19    0.13
  -5  -5  22   -0.13    0.14
  -5  -5  21    0.83    0.37
  -5  -5  20    0.07    0.21
  -5  -5  19    1.75    0.61
  -5   5  18    4.57    0.81
  -5  -5  18    6.49    1.17
  -5   5  17   -0.16    0.31
  -5  -5  17    0.35    0.54
  -5   5  16    0.67    0.46
   5   5 -16    0.77    0.27
  -5  -5  16    0.93    0.70
   5   5 -15    5.66    0.68
  -5  -5  15    6.45    0.90
  -5  -5  15    5.89    1.22
  -5   5  15    6.31    1.00
  -5   5  14    3.77    0.86
   5   5 -14    2.58    0.46
   5   5 -13    6.97    0.74
  -5   5  13   10.66    1.32
  -5   5  12    3.71    0.95
   5   5 -12    1.37    0.34
  -5   5  12    2.72    1.48
   5   5 -11    0.39    0.22
  -5   5  11    0.22    0.52
  -5   5  10    4.68    1.64
   5   5 -10    3.85    0.44
  -5   5   9    0.76    0.89
  -5   5   8   13.49    2.61
  -5   5   7   -0.02    0.59
  -5   5   6    0.74    0.61
  -5   5   5   11.35    2.03
   5  -5  -5   11.92    1.91
   5  -5  -4   33.07    2.96
  -5  -5   3    4.27    1.09
   5  -5  -3    3.47    1.02
   5  -5  -2   28.62    2.68
  -5  -5   2   31.29    3.06
  -5  -5   1   15.32    2.14
   5  -5  -1   16.22    1.99
   5  -5   0   12.35    1.71
  -5  -5   0   12.83    1.96
  -5  -5  -1   31.80    3.13
   5  -5   1   29.08    3.01
  -5  -5  -2    0.79    0.80
   5  -5   2    0.44    0.47
  -5  -5  -3   36.18    3.74
   5  -5   3   37.54    3.67
   5  -5   4   -0.06    0.50
  -5  -5  -4    0.81    0.88
   5  -5   5   37.01    4.14
   5  -5   6    0.35    0.55
   5  -5   7    1.35    0.72
   5  -5   8    4.54    1.56
  -5   5  -8    4.87    0.63
  -5   5  -9    0.07    0.20
   5  -5   9    0.48    0.57
   5  -5  10    1.78    1.15
  -5   5 -10    1.82    0.44
   5  -5  11    0.43    0.56
  -5   5 -11    1.21    0.43
   5   5  12    1.08    0.96
  -5   5 -12    2.63    0.63
   5  -5  12    1.81    1.27
   5  -5  13    0.72    1.02
   5   5  13    2.33    1.34
  -5   5 -13    2.46    0.62
   5  -5  14    1.48    1.10
   5   5  14    3.04    1.35
  -5   5 -14    2.08    0.59
  -5   5 -15    0.53    0.36
  -5   5 -16    1.00    0.44
  -5   5 -17    0.30    0.28
  -5   5 -18    1.55    0.50
  -5   5 -19    1.28    0.42
  -5   5 -20    3.43    0.57
  -5   5 -21    0.66    0.23
  -5  -7  21    0.16    0.15
  -5  -7  20    0.17    0.17
  -5  -7  19    0.63    0.33
  -5  -7  18    7.93    1.15
  -5  -7  17    0.94    0.37
  -5   7  17    0.85    0.39
  -5  -7  17    1.08    0.47
  -5   7  16    2.46    0.60
  -5  -7  16    3.55    0.78
  -5  -7  16    3.64    0.95
   5   7 -15    2.34    0.45
  -5  -7  15    3.06    0.87
  -5  -7  15    2.89    0.74
  -5   7  15    2.86    0.66
   5   7 -14    0.12    0.16
  -5  -7  14    0.82    0.57
  -5   7  14    0.48    0.45
   5   7 -13    4.76    0.66
  -5   7  13    5.83    1.05
  -5  -7  13    4.42    0.91
  -5  -7  12    0.13    0.17
   5   7 -12    0.21    0.12
  -5   7  11    0.72    0.82
   5   7 -11    0.37    0.15
  -5  -7  11   -0.34    0.42
   5   7 -10    5.14    0.62
  -5  -7  10    3.84    0.69
   5   7  -9    0.48    0.25
  -5  -7   9   -0.07    0.25
  -5   7   9    0.68    0.81
   5   7  -8    0.11    0.14
  -5   7   8   -0.17    0.48
  -5  -7   8    0.30    0.16
   5   7  -7    2.20    0.35
  -5   7   7    2.70    1.30
  -5   7   6    1.99    1.09
  -5  -7   6    2.01    0.95
   5  -7  -6    1.68    0.95
  -5   7   5   28.89    3.48
  -5  -7   5   29.83    3.77
   5  -7  -5   30.24    3.60
  -5  -7   4   13.04    2.42
   5  -7  -4   11.48    2.17
  -5  -7   3    2.63    1.05
   5  -7  -3    2.33    1.02
  -5  -7   2    2.11    1.00
   5  -7  -2    1.77    0.87
  -5  -7   1    0.17    0.47
   5  -7  -1    0.40    0.40
  -5  -7   0   14.65    2.58
   5  -7   0   12.00    2.24
  -5  -7  -1   98.50    6.70
   5  -7   1   91.56    6.04
  -5  -7  -2   26.79    3.55
  -5  -7  -3   26.62    3.77
  -5   7  -4    0.41    0.20
  -5  -7  -4    1.03    0.89
  -5  -7  -5   15.47    3.04
  -5   7  -5   13.55    1.02
  -5   7  -6   24.14    1.48
   5  -7   6   26.91    4.19
   5  -7   7   32.38    4.73
  -5   7  -7   33.17    1.86
   5  -7   8    2.36    1.40
  -5   7  -8    2.24    0.49
   5  -7   9    5.60    1.96
  -5   7  -9    6.30    0.91
   5  -7  10    1.32    1.04
  -5   7 -10    0.97    0.30
   5  -7  11    1.20    1.26
  -5   7 -11   -0.28    0.37
  -5   7 -12    0.89    0.39
   5  -7  12    0.64    1.13
   5   7  13   -0.91    0.99
   5  -7  13    0.06    0.57
  -5   7 -13   -0.26    0.32
  -5   7 -14    0.64    0.26
  -5   7 -15    0.19    0.25
  -5   7 -16    0.80    0.41
  -5   7 -17    0.48    0.32
  -5   7 -18    0.87    0.36
  -5   7 -19    1.02    0.34
  -5   7 -20    1.25    0.30
  -5  -9  19    0.18    0.11
  -5  -9  18    3.73    0.57
  -5  -9  18    4.10    0.64
  -5  -9  17    2.00    0.54
  -5  -9  17    1.53    0.43
  -5  -9  16   -0.20    0.25
  -5  -9  16    0.20    0.27
  -5   9  15    1.21    0.35
  -5  -9  15    0.89    0.34
  -5  -9  15    1.87    0.69
  -5  -9  14    1.34    0.50
  -5   9  14    1.60    0.42
   5   9 -14    1.72    0.39
  -5  -9  14    2.33    0.82
  -5   9  13    1.05    0.43
   5   9 -13    0.26    0.16
  -5  -9  13    0.42    0.31
  -5  -9  12    2.21    0.52
  -5   9  12    3.10    0.68
   5   9 -12    3.51    0.58
   5   9 -11    1.20    0.35
  -5   9  11    2.17    0.62
  -5  -9  11    1.04    0.56
  -5   9  10    0.88    0.52
   5   9 -10    0.00    0.18
  -5  -9  10   -0.28    0.59
  -5   9  10   -0.11    0.48
   5   9  -9    0.25    0.24
  -5   9   9    0.44    0.62
  -5  -9   9   -0.07    0.91
  -5  -9   8   -0.03    1.10
  -5   9   8    0.69    0.67
   5   9  -8    0.86    0.34
  -5   9   7    0.78    0.77
   5   9  -7    1.17    0.40
  -5  -9   7    1.91    1.35
  -5   9   6    6.31    1.75
   5  -9  -6    6.60    1.94
   5   9  -6    6.18    0.74
  -5  -9   6    6.78    2.19
  -5   9   5    1.12    0.71
   5   9  -5    0.93    0.30
  -5  -9   5    1.46    1.14
   5  -9  -5    0.68    0.85
   5  -9  -4    0.08    0.65
  -5  -9   4    1.19    0.97
   5   9  -4    0.73    0.26
  -5  -9   3    0.30    0.61
   5   9  -3    0.14    0.12
   5  -9  -3    0.43    0.61
  -5  -9   2    0.09    0.53
   5  -9  -2    0.12    0.63
  -5  -9   1    3.68    0.57
   5  -9  -1    3.75    1.57
  -5  -9   1    3.92    1.52
  -5  -9   0    5.64    1.89
   5  -9   0    3.71    1.63
  -5  -9   0    5.42    0.62
  -5   9  -1    6.77    0.84
   5  -9   1    7.23    2.09
  -5  -9  -1    7.34    2.13
  -5  -9  -2    4.49    1.67
   5  -9   2    3.30    1.45
  -5   9  -2    4.94    0.68
   5  -9   3   -0.08    0.69
  -5   9  -3    0.29    0.23
  -5  -9  -3    0.27    0.57
   5  -9   4    0.44    0.60
  -5  -9  -4    1.34    1.32
  -5   9  -4    0.70    0.32
  -5   9  -5    1.36    0.45
  -5  -9  -5    1.60    1.26
  -5   9  -6    7.99    1.02
  -5   9  -7    3.74    0.73
  -5   9  -8    5.51    0.94
  -5   9  -9    2.60    0.68
  -5   9 -10    0.42    0.31
  -5   9 -11   13.89    1.46
  -5   9 -12   16.87    1.66
  -5   9 -13    1.34    0.52
  -5   9 -14    1.33    0.53
  -5   9 -15    0.11    0.20
  -5   9 -16    0.58    0.33
  -5   9 -17    0.15    0.20
  -5   9 -18    0.64    0.26
  -5   9 -19    0.94    0.26
  -5 -11  17    0.12    0.16
  -5 -11  16    0.39    0.28
  -5 -11  15    0.06    0.25
  -5 -11  14    0.39    0.34
  -5 -11  13    0.37    0.57
   5  11 -13    0.16    0.18
   5  11 -12    0.82    0.21
  -5 -11  12    2.06    0.80
   5  11 -11    0.31    0.23
   5  11 -10    3.65    0.63
   5  11  -9    0.79    0.34
   5  11  -8   13.28    1.29
  -5 -11   8   12.38    2.96
  -5  11   7    4.75    1.51
   5  11  -7    3.30    0.67
  -5 -11   7    2.93    1.71
  -5 -11   6   23.63    4.01
  -5  11   6   22.25    3.15
   5 -11  -6   20.39    3.51
   5  11  -6   24.25    1.74
   5 -11  -5    9.24    2.40
  -5 -11   5   11.74    2.86
  -5  11   5   14.76    2.60
   5  11  -5   11.45    1.19
   5 -11  -4    1.32    1.01
  -5  11   4    1.44    0.68
  -5 -11   4    1.26    1.20
   5  11  -4    2.14    0.51
  -5 -11   3   11.35    1.32
  -5 -11   3    9.56    2.75
   5 -11  -3   11.09    2.60
   5  11  -3   10.39    1.14
   5  11  -2    5.60    0.81
  -5 -11   2    5.54    2.15
  -5 -11   2    5.47    0.85
   5 -11  -2    4.35    1.93
  -5 -11   1    7.46    0.90
   5 -11  -1    8.37    2.34
  -5 -11   1    7.33    2.24
  -5 -11   0   17.55    3.60
  -5  11   0   17.82    1.60
   5 -11   0   16.89    3.31
  -5 -11  -1    3.62    1.79
  -5  11  -1    4.04    0.75
   5 -11   1    4.47    1.90
   5 -11   2    8.95    2.60
  -5 -11  -2    8.41    2.65
  -5  11  -2    9.65    1.21
   5 -11   3    3.25    1.65
  -5 -11  -3    3.35    1.88
  -5  11  -3    3.70    0.76
   5 -11   4    0.21    0.55
  -5 -11  -4   -0.52    0.83
  -5  11  -4    0.74    0.43
  -5  11  -5    4.87    0.92
   5 -11   5    3.54    1.62
  -5  11  -6    1.47    0.59
   5 -11   6    0.39    0.58
  -5  11  -7    1.08    0.56
   5 -11   7    0.82    0.85
  -5  11  -8    0.36    0.34
  -5  11  -9    0.43    0.41
  -5  11 -10    0.14    0.29
  -5  11 -11   -0.27    0.44
  -5  11 -12   -0.25    0.41
  -5  11 -13    1.33    0.46
  -5  11 -14    1.87    0.50
  -5  11 -15    0.63    0.32
  -5  11 -16    0.91    0.31
  -5  11 -17    0.26    0.16
  -5 -13  15    1.07    0.37
  -5 -13  14    0.19    0.27
  -5 -13  13    0.13    0.34
   5  13 -12    0.24    0.13
  -5 -13  12    0.48    0.41
   5  13 -11   -0.04    0.14
  -5 -13  11    0.68    0.57
   5  13 -10   -0.06    0.23
  -5 -13  10    0.64    0.53
  -5 -13   9    2.51    0.88
   5  13  -9    3.90    0.70
   5  13  -8    1.36    0.46
  -5 -13   8    0.20    0.24
  -5 -13   7   -0.76    0.60
   5  13  -7    0.51    0.38
  -5 -13   6    3.71    0.86
   5  13  -6    4.87    0.85
   5  13  -5    0.31    0.40
  -5 -13   5    0.31    0.26
  -5 -13   4    0.13    0.24
   5  13  -4   -0.28    0.24
   5  13  -3    0.61    0.34
  -5 -13   3    0.21    0.25
   5  13  -2    0.94    0.38
  -5  13   2    0.95    0.41
  -5 -13   2    0.68    0.34
  -5  13   1    2.62    0.73
   5  13  -1    2.92    0.69
  -5  13   0    1.46    0.55
   5  13   0    1.33    0.52
  -5  13  -1    2.30    0.70
  -5  13  -2    0.09    0.36
  -5  13  -3    0.98    0.52
  -5  13  -4    1.47    0.65
  -5  13  -5    1.43    0.61
  -5  13  -6    5.65    1.02
  -5  13  -7    3.92    0.89
  -5  13  -8    8.11    1.21
  -5  13  -9    2.17    0.63
  -5  13 -10    0.83    0.26
  -5  13 -11   -0.06    0.30
  -5  13 -12    0.46    0.25
  -5  13 -13    1.04    0.34
  -5  13 -14    5.04    0.63
  -5  13 -15    0.39    0.19
  -5 -15  12    1.04    0.30
  -5  15  11    0.70    0.21
  -5 -15  11    0.95    0.35
  -5 -15  10    1.09    0.40
  -5  15  10    0.72    0.18
   5  15  -9    0.03    0.12
  -5 -15   9   -0.16    0.20
  -5  15   9   -0.42    0.31
  -5  15   8    1.70    0.47
   5  15  -8    1.80    0.38
  -5 -15   8    1.51    0.51
  -5  15   7    0.12    0.29
  -5 -15   7    0.61    0.34
   5  15  -7    0.42    0.29
   5  15  -6    0.25    0.22
  -5 -15   6    0.02    0.22
  -5  15   6   -0.16    0.30
  -5 -15   5    6.21    0.87
  -5  15   5    6.95    1.03
   5  15  -5    6.61    0.92
  -5  15   4    6.02    0.97
   5  15  -4    6.22    0.92
  -5  15   3    0.24    0.23
   5  15  -3    0.05    0.29
   5  15  -2    0.30    0.29
  -5  15   2    0.14    0.30
  -5  15   1    0.24    0.39
   5  15  -1    0.37    0.33
   5  15   0    1.43    0.50
  -5  15   0    1.42    0.51
  -5  15  -1    4.86    0.92
   5  15   1    4.14    0.81
   5  15   2    2.50    0.63
  -5  15  -2    3.42    0.86
   5  15   3    1.45    0.52
  -5  15  -3    1.25    0.53
  -5  15  -4    0.69    0.42
  -5  15  -5    1.07    0.52
  -5  15  -6    0.37    0.38
  -5  15  -7    1.34    0.48
  -5  15  -8    1.09    0.39
  -5  15  -9   -0.61    0.30
  -5  15 -10   -0.14    0.21
  -5  15 -11   -0.07    0.12
  -5  17   4    7.95    0.80
   5  17  -3    0.53    0.23
  -5  17   3    0.99    0.35
  -5  17   2    0.65    0.32
   5  17  -2    0.04    0.12
   5  17  -1    1.13    0.32
  -5  17   1    0.44    0.25
   5  17   0    0.33    0.20
  -5  17   0    0.28    0.33
   5  17   1    3.94    0.57
  -5  17  -1    3.52    0.63
   5  17   2    0.81    0.30
  -5  17  -2    0.87    0.34
  -5  17  -3    1.30    0.36
   5  17   3    0.83    0.27
  -5  17  -4    0.54    0.25
   5  17   4    0.40    0.21
  -5  17  -5    1.07    0.32
  -6   0  22    0.08    0.13
  -6   0  21   -0.28    0.24
  -6   0  20    0.71    0.30
  -6   0  19    0.26    0.26
  -6   0  18    0.40    0.37
  -6   0  17    3.21    0.71
  -6   0  17    3.94    0.90
  -6   0  16   14.90    1.39
  -6   0  16   14.91    1.72
  -6   0  15    0.31    0.28
  -6   0  15    0.66    0.56
  -6   0  14    0.41    0.23
  -6   0  14    1.52    0.60
  -6   0  13   -0.17    0.43
  -6   0  13    0.52    0.33
  -6   0  12    2.30    0.47
  -6   0  12    3.47    0.65
  -6   0  11   13.59    1.19
  -6   0  10    0.15    0.28
  -6   0   9    6.25    0.69
  -6   0   8   12.21    0.92
  -6   0   7   53.72    4.68
  -6   0   7   52.12    1.71
  -6   0   6  229.56    3.33
  -6   0   6  215.66    8.82
  -6   0   5  381.14    3.92
  -6   0   5  408.01   10.77
  -6   0   4  608.76    4.69
  -6   0   4  633.29   12.22
  -6   0   3   62.02    3.48
   6   0  -2   10.82    0.69
  -6   0   2   13.03    1.47
   6   0  -1    0.42    0.27
  -6   0   1    0.20    0.21
   6   0   0   95.72    3.61
   6   0   1   10.64    1.37
   6   0   2  230.07    7.07
   6   0   3   33.01    3.05
   6   0   4   49.93    4.01
   6   0   5    8.52    1.78
   6   0   6   80.02    5.71
   6   0   7   16.94    2.74
   6   0   8    8.77    2.18
   6   0   9   18.43    3.07
  -6   0 -10    7.91    0.78
   6   0  10    7.21    1.97
  -6   0 -11    1.34    0.42
   6   0  11    0.70    0.57
   6   0  12    0.10    0.71
  -6   0 -12    0.41    0.28
  -6   0 -13    2.91    0.60
   6   0  13    3.73    1.59
  -6   0 -14    9.32    1.13
   6   0  14    8.97    2.43
   6   0  15    1.95    0.99
  -6   0 -15    2.59    0.61
  -6   0 -16    0.07    0.25
  -6   0 -17    1.61    0.46
  -6   0 -18    0.37    0.23
  -6   0 -19    1.02    0.39
  -6   0 -20    3.95    0.68
  -6   0 -20    3.96    0.64
  -6   0 -21    0.46    0.19
  -6  -2  22    0.34    0.21
  -6  -2  21    0.15    0.26
  -6  -2  20    0.13    0.23
  -6   2  20    0.40    0.19
  -6  -2  19    0.87    0.47
  -6   2  19    0.44    0.26
  -6   2  19    0.50    0.25
  -6   2  18    0.06    0.21
  -6   2  18   -0.17    0.31
  -6  -2  18    0.06    0.25
  -6  -2  17    1.36    0.68
  -6   2  17    0.80    0.36
  -6   2  17    1.04    0.44
  -6   2  16   13.10    1.42
  -6   2  16   12.81    1.37
  -6  -2  16   13.44    1.72
  -6  -2  15    1.54    0.73
  -6   2  15    0.30    0.30
  -6   2  15    0.79    0.41
  -6   2  14    4.02    0.72
  -6   2  14    5.84    0.95
  -6  -2  14    3.82    0.99
  -6   2  13    0.52    0.48
  -6   2  13    0.00    0.15
  -6   2  12    0.30    0.47
  -6  -2  12   -0.71    0.47
  -6   2  12   -0.16    0.26
  -6  -2  11    2.59    0.42
  -6   2  11    3.86    0.72
  -6   2  11    3.44    0.55
  -6  -2  10    1.95    0.41
  -6   2  10    2.34    0.55
  -6   2  10    2.23    1.05
  -6   2   9    5.12    0.68
  -6   2   9    6.65    1.95
  -6  -2   9    8.81    0.80
  -6   2   8    1.07    0.28
  -6   2   8    0.98    0.71
  -6   2   7    0.13    0.62
  -6   2   7    0.09    0.19
  -6   2   6   18.61    2.68
  -6   2   6   15.96    0.93
  -6   2   5   10.48    0.69
  -6   2   5   11.21    1.92
  -6   2   4   58.35    1.43
  -6   2   4   53.06    3.75
   6  -2  -3   37.34    1.70
  -6   2   3   40.53    1.03
  -6   2   3   40.42    3.00
  -6  -2   2   21.99    1.51
   6  -2  -2   21.94    1.46
   6  -2  -2   23.38    1.23
  -6  -2   1   62.58    2.67
   6  -2  -1   63.38    2.68
   6  -2  -1   63.78    2.11
   6  -2   0   22.46    1.81
  -6  -2   0   22.43    1.78
   6  -2   1   79.06    3.77
   6  -2   2   30.22    2.61
   6  -2   3    9.42    1.56
   6  -2   4    3.89    1.09
   6  -2   5    1.23    0.72
   6  -2   6    0.10    0.59
   6  -2   7   56.92    5.01
   6   2   7   66.40    5.72
   6   2   8   54.78    5.55
   6  -2   8   48.56    4.89
  -6   2  -9    3.70    0.51
   6   2   9    4.20    1.62
   6  -2   9    3.83    1.49
   6   2  10    3.86    1.74
  -6   2 -10    4.42    0.62
  -6  -2 -10    3.82    0.57
   6  -2  10    4.51    1.77
   6   2  11    0.65    0.84
  -6  -2 -11    0.38    0.19
  -6   2 -11    0.51    0.24
   6  -2  11    0.14    0.50
   6   2  12    5.08    1.80
  -6  -2 -12    4.56    0.73
  -6   2 -12    3.93    0.68
   6  -2  12    4.42    1.79
  -6  -2 -13    7.76    0.98
  -6   2 -13    7.19    0.98
   6   2  13    8.41    2.33
   6  -2  13    7.94    2.34
   6   2  14   11.10    2.57
  -6  -2 -14   12.42    1.31
  -6   2 -14   11.44    1.21
   6  -2  14    9.02    2.42
  -6  -2 -15    8.01    1.09
  -6   2 -15    8.00    1.09
   6   2  15    6.72    1.87
   6  -2  15    9.64    2.41
  -6  -2 -16    0.06    0.23
  -6   2 -16    0.42    0.36
  -6  -2 -17    0.35    0.28
  -6  -2 -17    0.76    0.39
  -6   2 -17    0.50    0.31
   6   2  18    0.53    0.24
  -6  -2 -18    0.13    0.36
  -6  -2 -18    0.02    0.14
  -6   2 -18    0.14    0.23
  -6   2 -19   -0.10    0.28
  -6   2 -20    0.42    0.21
  -6   2 -21    0.08    0.17
  -6   2 -21    0.00    0.13
  -6   2 -22    0.25    0.12
   6  -2  22    0.23    0.17
  -6  -4  22    0.72    0.26
  -6  -4  21    0.33    0.26
  -6  -4  20    0.84    0.39
  -6  -4  19    2.16    0.66
  -6   4  19    0.94    0.32
  -6  -4  18    0.14    0.43
  -6   4  18   -0.52    0.37
  -6   4  17   -0.09    0.38
  -6  -4  17    0.32    0.56
  -6   4  16   -0.06    0.32
  -6  -4  16    0.54    0.58
  -6   4  15    1.51    0.58
  -6  -4  15    2.09    0.82
  -6  -4  14    0.30    0.24
  -6  -4  14    1.30    0.65
  -6   4  14    1.15    0.55
  -6  -4  13    1.47    0.48
  -6   4  13    2.32    0.66
  -6  -4  13    0.90    0.43
  -6   4  12    2.14    0.75
  -6   4  12   -0.67    1.29
  -6   4  11    5.24    0.92
  -6   4  11    4.35    1.69
  -6   4  10    3.76    1.53
  -6   4  10    3.93    0.74
  -6   4   9   12.62    1.13
  -6   4   9   18.16    3.06
  -6   4   8    0.45    0.66
  -6   4   8    0.01    0.23
  -6   4   7   34.47    1.57
  -6   4   7   44.58    4.40
  -6   4   6    0.09    0.20
  -6   4   6    0.61    0.66
  -6   4   5    0.86    0.64
  -6   4   5    0.30    0.17
   6  -4  -5    0.83    0.55
  -6   4   4   21.12    0.90
   6  -4  -4   22.23    2.13
   6  -4  -3   27.33    2.19
  -6   4   3   27.16    0.84
   6  -4  -2    3.72    0.83
  -6  -4   2    3.00    0.77
   6  -4  -1    0.59    0.41
  -6  -4   1    1.24    0.57
   6  -4   0    2.75    0.83
  -6  -4   0    3.30    0.85
  -6  -4  -1   35.16    3.06
   6  -4   1   34.98    2.95
  -6  -4  -2  232.28    8.29
   6  -4   2  224.45    8.01
  -6  -4  -3   67.35    4.76
   6  -4   3   65.86    4.86
   6  -4   4   32.31    3.69
   6  -4   5   12.72    2.39
   6  -4   6   11.56    2.40
   6  -4   7   -0.04    0.78
  -6   4  -8   11.63    0.89
  -6  -4  -8   10.49    0.88
   6  -4   8   12.99    2.86
  -6  -4  -9    4.71    0.68
  -6   4  -9    6.12    0.72
   6  -4   9    4.43    1.51
  -6  -4 -10    5.06    0.76
  -6  -4 -10    5.34    0.60
   6   4  10    5.73    2.04
  -6   4 -10    6.22    0.78
   6  -4  10    5.55    1.99
  -6  -4 -11    2.34    0.41
  -6   4 -11    2.53    0.57
   6   4  11    1.74    1.09
  -6  -4 -11    2.02    0.47
   6  -4  11    3.26    1.71
  -6  -4 -12   -0.46    0.39
  -6  -4 -12    0.13    0.20
  -6   4 -12    0.35    0.28
   6   4  12   -0.46    0.89
   6  -4  12    0.50    1.05
  -6  -4 -13    0.61    0.27
  -6  -4 -13   -0.11    0.35
  -6   4 -13    0.09    0.20
   6  -4  13   -0.01    0.49
   6   4  14    0.58    0.56
  -6   4 -14    0.21    0.20
   6  -4  15    1.27    0.53
   6   4  15    1.86    0.99
  -6   4 -15    1.31    0.47
  -6   4 -16    0.40    0.37
  -6   4 -17    0.44    0.32
  -6   4 -18    0.89    0.39
  -6   4 -19    0.03    0.18
  -6   4 -20   -0.15    0.21
  -6   4 -21    0.35    0.15
  -6  -6  21    0.35    0.24
  -6  -6  20    0.87    0.35
  -6  -6  19   -0.24    0.32
  -6  -6  18    2.41    0.72
  -6   6  18    2.06    0.51
  -6  -6  17    0.28    0.33
  -6   6  17    0.15    0.21
  -6   6  16    2.83    0.68
  -6  -6  16    3.57    0.92
  -6  -6  16    3.40    0.69
  -6   6  15    5.98    0.95
  -6  -6  15    6.25    1.23
  -6  -6  15    7.11    1.06
  -6  -6  14    1.26    0.68
  -6  -6  14    1.24    0.56
  -6   6  14    0.83    0.52
  -6   6  13    5.31    0.94
  -6   6  13    3.96    1.68
  -6  -6  13    3.77    0.91
  -6   6  12    1.42    0.70
  -6   6  12    0.34    0.62
  -6  -6  12    0.19    0.26
  -6   6  11    4.33    1.71
  -6   6  11    6.05    0.98
  -6  -6  11    2.19    0.54
  -6   6  10    1.06    0.59
   6   6 -10    0.07    0.14
  -6   6  10    0.09    0.51
  -6   6   9    3.68    1.38
  -6  -6   9    2.32    0.46
  -6  -6   8    0.31    0.16
  -6   6   8    0.44    0.70
  -6   6   7   28.92    3.73
   6  -6  -6    4.30    1.35
  -6   6   6    5.18    1.55
  -6   6   5   -0.02    0.60
  -6  -6   5    0.04    0.70
   6  -6  -5    0.39    0.49
  -6   6   4   61.32    1.58
   6  -6  -4   70.08    4.67
  -6  -6   4   74.98    5.38
  -6  -6   3   33.04    3.52
  -6   6   3   25.74    0.84
   6  -6  -3   31.38    3.09
  -6  -6   2    3.83    1.15
   6  -6  -2    3.99    1.16
   6  -6  -1    0.86    0.48
  -6  -6   1    2.12    0.94
   6  -6   0   13.90    2.14
  -6  -6   0   15.88    2.46
  -6  -6  -1    3.00    1.19
  -6  -6  -2    3.31    1.21
   6  -6   2    3.32    1.26
  -6  -6  -3   12.87    2.39
   6  -6   3   11.89    2.49
  -6  -6  -4    2.07    1.11
   6  -6   4    1.28    0.87
   6  -6   5    0.56    0.80
   6  -6   6    2.58    1.27
  -6   6  -6    2.79    0.49
   6  -6   7   39.50    4.92
  -6   6  -7   40.37    1.86
   6  -6   8   20.91    3.60
  -6   6  -8   19.26    1.41
   6  -6   9   -0.03    0.42
  -6   6  -9    0.23    0.19
   6  -6  10    0.66    0.58
  -6   6 -10    0.92    0.38
   6  -6  11    0.92    0.88
  -6   6 -11    1.11    0.39
   6   6  12    2.79    1.26
   6  -6  12    2.24    1.26
  -6   6 -12    3.80    0.74
  -6   6 -13    5.92    0.94
   6  -6  13    3.56    1.73
   6   6  13    4.46    1.83
   6  -6  14    0.41    0.82
  -6   6 -14    0.21    0.28
   6   6  14   -0.75    0.56
  -6   6 -15    0.09    0.25
  -6   6 -16    1.55    0.56
  -6   6 -17    2.03    0.59
  -6   6 -18    7.20    0.96
  -6   6 -19    1.75    0.45
  -6   6 -20    1.67    0.38
  -6   6 -21    2.03    0.34
   6  -6  21    2.14    0.43
  -6  -8  20    2.26    0.43
  -6  -8  19    0.40    0.27
  -6  -8  18    1.44    0.43
  -6  -8  17    6.36    0.90
  -6  -8  17    5.85    0.95
  -6   8  16    2.27    0.49
  -6  -8  16    2.79    0.70
  -6  -8  16    3.38    0.77
  -6  -8  15    9.05    1.30
  -6   8  15    6.36    0.91
  -6  -8  15    7.85    1.18
  -6   8  14    0.27    0.30
  -6  -8  14    0.60    0.50
  -6  -8  14    0.05    0.29
  -6   8  13    1.13    0.49
  -6  -8  13    1.22    0.65
  -6  -8  13    0.62    0.44
  -6  -8  12    1.16    0.42
  -6   8  12    1.67    0.97
  -6   8  12    1.87    0.65
   6   8 -12    1.90    0.41
  -6  -8  11    0.07    0.22
   6   8 -11    0.16    0.15
  -6   8  11    0.77    0.45
  -6  -8  11    0.10    0.69
  -6   8  11   -0.53    0.83
   6   8 -10    4.59    0.61
  -6   8  10    3.01    0.67
  -6  -8  10    4.73    1.62
  -6   8  10    5.28    1.74
  -6  -8  10    4.28    0.66
  -6   8   9    4.38    0.71
  -6  -8   9    6.23    1.76
   6   8  -9    7.18    0.75
  -6   8   9    8.29    2.25
  -6   8   8   -0.22    0.30
   6   8  -8    0.62    0.23
  -6   8   8    0.84    0.67
  -6  -8   8    0.54    0.83
  -6   8   7    0.06    0.19
  -6   8   7    0.14    0.61
   6   8  -7    0.54    0.23
  -6  -8   7   -0.12    0.48
  -6   8   6    6.36    1.77
  -6  -8   6    6.22    1.84
   6   8  -6    6.18    0.62
   6  -8  -6    5.31    1.60
   6  -8  -5    0.96    0.85
  -6   8   5    0.56    0.53
   6   8  -5    0.89    0.26
  -6  -8   5    1.67    1.11
   6  -8  -4   -0.52    0.79
  -6  -8   4   -0.01    0.61
   6   8  -4   -0.06    0.14
   6  -8  -3   -0.02    0.42
  -6  -8   3    0.28    0.57
  -6  -8   2    1.34    0.92
   6  -8  -2    0.24    0.48
  -6  -8   1    3.08    0.48
  -6  -8   1    3.61    1.43
   6  -8  -1    2.71    1.10
   6  -8   0    8.36    2.03
  -6  -8   0   10.68    2.41
  -6  -8  -1   16.26    2.98
   6  -8   1   15.19    2.75
  -6   8  -1   13.57    1.01
  -6  -8  -2    0.62    0.71
   6  -8   2    0.16    0.72
  -6   8  -2    0.40    0.20
  -6   8  -3    4.51    0.62
  -6   8  -3    3.37    0.43
  -6   8  -4    0.01    0.15
  -6   8  -4   -0.04    0.11
  -6  -8  -4   -0.42    1.04
  -6   8  -5    0.51    0.26
  -6   8  -5    0.22    0.23
  -6   8  -6    6.52    0.87
  -6   8  -6    6.40    0.67
  -6   8  -7   26.00    1.77
  -6   8  -8   16.18    1.50
  -6   8  -9    4.73    0.83
  -6   8 -10   -0.02    0.30
  -6   8 -11    2.77    0.61
  -6   8 -12   14.63    1.59
  -6   8 -13    3.58    0.83
  -6   8 -14    0.12    0.30
  -6   8 -15    0.25    0.33
  -6   8 -16    0.52    0.32
  -6   8 -17    0.08    0.24
  -6   8 -18    0.76    0.30
  -6   8 -19    0.34    0.19
  -6 -10  18    0.15    0.14
  -6 -10  17    0.23    0.19
  -6 -10  16    0.33    0.29
  -6 -10  15    0.20    0.34
  -6 -10  14    0.50    0.48
  -6 -10  13    2.52    0.85
   6  10 -12   -0.21    0.23
  -6 -10  12    1.29    0.84
   6  10 -11    9.22    0.94
  -6 -10  11   11.24    1.74
   6  10 -10    5.31    0.73
  -6  10   9    2.60    1.27
   6  10  -9    2.46    0.54
  -6 -10   9    3.52    1.41
   6  10  -8    1.81    0.45
  -6 -10   8    1.10    0.83
  -6  10   8    0.29    0.47
  -6  10   7    1.98    1.14
   6  10  -7    2.47    0.54
  -6 -10   7    1.96    1.14
   6 -10  -6    2.49    1.17
   6  10  -6    2.53    0.53
  -6  10   6    2.28    1.16
  -6 -10   6    2.25    1.21
  -6  10   5   13.67    2.70
  -6 -10   5   13.02    3.09
   6  10  -5   12.30    1.12
   6 -10  -5   12.65    2.64
   6 -10  -4    0.44    0.88
   6  10  -4    0.15    0.14
  -6 -10   4   -0.12    0.29
  -6 -10   4   -0.51    0.90
  -6 -10   3    0.06    0.24
   6  10  -3   -0.19    0.26
  -6 -10   3    0.06    0.56
   6 -10  -3    0.46    0.66
  -6 -10   2    7.94    1.01
  -6 -10   2    8.22    2.31
   6 -10  -2    6.70    2.14
  -6 -10   1    0.78    0.33
   6 -10  -1    0.36    0.58
  -6 -10   1    1.02    1.01
  -6 -10   0   28.71    4.40
   6 -10   0   30.81    4.33
  -6 -10   0   28.93    1.56
  -6  10   0   29.06    1.89
  -6 -10  -1   10.93    2.69
  -6  10  -1   10.31    1.14
  -6  10  -1    8.75    0.72
   6 -10   1   10.73    2.65
  -6 -10  -2    2.61    1.71
  -6  10  -2    1.65    0.47
   6 -10   2    1.95    1.13
   6 -10   3    1.85    1.05
  -6  10  -3    2.62    0.60
  -6 -10  -3    1.76    1.36
  -6 -10  -4    2.82    1.49
  -6  10  -4    3.50    0.72
   6 -10   4    1.65    0.75
  -6  10  -5    1.72    0.52
   6 -10   5    1.38    1.16
   6 -10   6    0.28    0.56
  -6  10  -6    0.97    0.46
  -6  10  -7    1.92    0.60
   6 -10   7    1.07    0.93
  -6  10  -8    1.49    0.57
  -6  10  -9    0.19    0.30
  -6  10 -10    2.36    0.62
  -6  10 -11   -0.22    0.48
  -6  10 -12    3.10    0.73
  -6  10 -13    0.41    0.32
  -6  10 -14    0.05    0.30
  -6  10 -15    0.18    0.23
  -6  10 -16    0.35    0.24
  -6  10 -17    0.22    0.18
  -6  10 -18    0.21    0.15
  -6 -12  16    3.19    0.58
  -6 -12  15    0.21    0.25
  -6 -12  14    0.16    0.36
  -6 -12  13    0.30    0.42
  -6 -12  12    1.05    0.57
   6  12 -11   -0.25    0.26
  -6 -12  11    0.68    0.64
   6  12 -10    0.96    0.36
  -6 -12  10    1.66    0.81
   6  12  -9    5.57    0.81
  -6 -12   9    3.97    0.98
   6  12  -8    4.65    0.77
  -6 -12   8    2.83    0.61
   6  12  -7    1.25    0.43
  -6 -12   7    0.67    0.42
  -6 -12   6    8.50    1.32
   6  12  -6    9.83    1.15
   6  12  -5    6.95    0.95
  -6 -12   5    6.48    1.13
  -6  12   4    3.04    1.33
  -6 -12   4    2.89    0.75
   6  12  -4    2.92    0.64
  -6 -12   4    1.20    0.86
   6 -12  -4    2.63    1.30
   6 -12  -3    1.75    1.25
   6  12  -3    1.63    0.45
  -6 -12   3    1.97    0.57
  -6 -12   3    1.32    1.07
  -6 -12   2    2.71    0.63
   6  12  -2    2.77    0.62
  -6  12   2    2.61    0.71
  -6 -12   2    1.99    1.29
   6 -12  -2    1.71    1.10
  -6  12   1    0.48    0.29
   6  12  -1    0.46    0.27
  -6 -12   1    1.15    0.85
   6 -12  -1    1.22    0.75
  -6  12   0    0.83    0.38
  -6 -12   0   -0.19    1.00
   6 -12   0    2.00    1.36
  -6  12  -1    0.20    0.28
   6 -12   1    1.00    1.16
  -6 -12  -1   -0.11    0.64
  -6 -12  -2    7.22    2.24
   6 -12   2    6.93    2.19
  -6  12  -2    7.97    1.16
  -6 -12  -3    1.62    1.30
  -6  12  -3    2.89    0.77
   6 -12   3    1.70    1.12
  -6  12  -4    2.03    0.67
  -6  12  -5    6.25    1.15
  -6  12  -6    3.55    0.85
  -6  12  -7    0.00    0.34
  -6  12  -8    1.84    0.67
  -6  12  -9    2.80    0.73
  -6  12 -10    0.39    0.26
  -6  12 -11    0.34    0.27
  -6  12 -12    0.82    0.40
  -6  12 -13    0.90    0.38
  -6  12 -14    1.15    0.36
  -6  12 -15    0.65    0.25
  -6  12 -16   -0.02    0.10
  -6 -14  13   -0.09    0.19
  -6 -14  12    0.06    0.21
  -6 -14  11   -0.05    0.20
  -6 -14  10   -0.32    0.29
   6  14  -9    0.40    0.22
  -6 -14   9    0.05    0.22
  -6 -14   8   -0.13    0.32
   6  14  -8    0.17    0.25
  -6 -14   7   -0.04    0.34
   6  14  -7    0.24    0.26
   6  14  -6    1.10    0.38
  -6  14   6    0.59    0.36
  -6 -14   6    0.59    0.36
  -6  14   5    1.31    0.49
  -6 -14   5    1.93    0.61
   6  14  -5    1.76    0.52
   6  14  -4    8.25    1.06
  -6 -14   4    6.86    1.01
  -6  14   4    6.19    1.07
   6  14  -3    7.00    0.97
  -6 -14   3    6.33    0.89
  -6  14   3    5.58    1.02
  -6  14   2    1.84    0.65
   6  14  -2    2.27    0.63
   6  14  -1    0.96    0.43
  -6  14   1    1.02    0.44
  -6  14   0    0.07    0.27
   6  14   0   -0.03    0.21
   6  14   1   -0.54    0.43
  -6  14  -1    0.09    0.43
  -6  14  -2    0.51    0.47
  -6  14  -3    1.56    0.66
  -6  14  -4    0.47    0.42
  -6  14  -5    2.18    0.73
  -6  14  -6    4.04    0.89
  -6  14  -7    2.13    0.64
  -6  14  -8    2.96    0.70
  -6  14  -9    0.04    0.31
  -6  14 -10   -0.31    0.30
  -6  14 -11    0.89    0.34
  -6  14 -12    2.05    0.44
  -6  14 -13    1.30    0.30
  -6  16   8    0.13    0.15
  -6  16   7    1.68    0.38
  -6  16   6    0.00    0.13
   6  16  -6    0.06    0.13
  -6  16   5   -0.30    0.25
   6  16  -5    0.12    0.15
   6  16  -4    2.15    0.42
  -6  16   4    2.28    0.56
  -6  16   3    1.34    0.46
   6  16  -3    1.50    0.46
   6  16  -2    1.45    0.41
  -6  16   2    1.67    0.53
  -6  16   1    0.16    0.21
   6  16  -1    0.20    0.22
  -6  16   0    0.35    0.37
   6  16   0    0.08    0.19
   6  16   1    1.14    0.36
  -6  16  -1    0.70    0.38
  -6  16  -2    4.17    0.74
   6  16   2    3.89    0.69
   6  16   3    0.33    0.24
  -6  16  -3    0.32    0.28
  -6  16  -4    0.91    0.40
   6  16   4    0.34    0.25
  -6  16  -5    0.40    0.27
   6  16   5    0.03    0.20
  -6  16  -6    0.02    0.23
   6  16   6   -0.38    0.25
  -6  16  -7    1.84    0.42
  -6  16  -7    1.01    0.28
   6  16   7    2.17    0.43
  -6  16  -8    0.86    0.25
   6  16   8    0.66    0.24
  -7  -1  22    0.39    0.25
  -7   1  22   -0.04    0.11
  -7  -1  21   -0.08    0.24
  -7   1  21    0.62    0.29
  -7  -1  20    1.10    0.42
  -7   1  20    0.90    0.35
  -7   1  19    0.19    0.19
  -7  -1  19   -0.03    0.24
  -7  -1  18    3.07    0.77
  -7   1  18    3.21    0.70
  -7   1  17    4.37    0.78
  -7  -1  17    6.27    1.13
  -7   1  17    5.06    0.90
  -7   1  16    7.00    1.07
  -7  -1  16    7.35    1.23
  -7   1  16    6.14    0.96
  -7   1  15    0.98    0.49
  -7  -1  15    0.75    0.53
  -7   1  15    0.18    0.37
  -7   1  14    0.41    0.36
  -7   1  14    1.09    0.43
  -7  -1  14    0.44    0.40
  -7  -1  14    1.49    0.64
  -7  -1  13    0.10    0.47
  -7   1  13    0.19    0.26
  -7  -1  13    0.38    0.32
  -7   1  13    0.32    0.25
  -7  -1  12    0.23    0.35
  -7   1  12    0.91    0.28
  -7   1  12    1.18    0.42
  -7  -1  12    0.45    0.26
  -7  -1  11    2.92    0.61
  -7   1  11    3.26    0.58
  -7  -1  11    3.32    0.53
  -7   1  11    4.75    0.75
  -7   1  10   15.88    1.25
  -7  -1  10   18.19    1.29
  -7   1  10   16.93    1.17
  -7  -1  10   14.01    1.22
  -7  -1   9   19.02    1.29
  -7   1   9   16.15    1.19
  -7   1   8   25.00    1.41
  -7  -1   8   24.86    1.38
  -7   1   8   26.53    3.68
  -7   1   7   30.10    1.41
  -7  -1   7   29.09    1.36
  -7   1   7   26.83    3.49
  -7   1   6    0.52    0.23
  -7   1   6    0.40    0.53
  -7   1   5  325.34    3.79
  -7   1   5  324.78   10.09
  -7   1   4  169.41    2.56
  -7   1   4  169.62    6.85
  -7  -1   3    5.27    0.48
   7   1  -3    5.18    0.65
  -7   1   3    9.78    1.56
  -7  -1   3    9.15    1.38
  -7   1   2   97.42    4.31
   7  -1  -2  103.87    2.85
   7  -1  -1   58.52    2.54
  -7  -1   1   51.14    2.64
   7  -1   0   64.47    2.96
  -7  -1   0   54.65    2.25
  -7  -1  -1  158.06    3.15
   7  -1   1  170.77    5.36
   7  -1   2    4.84    1.02
   7  -1   3    8.26    1.48
   7   1   4   47.56    4.19
   7  -1   4   46.17    3.78
   7   1   5    3.21    1.13
   7  -1   5    3.44    1.15
   7  -1   6    4.81    1.45
   7   1   6    5.53    1.62
   7   1   7   14.97    2.74
   7  -1   7   13.85    2.55
   7   1   8    1.45    0.78
   7  -1   8    1.28    0.82
   7   1   9   16.55    3.15
  -7  -1  -9   16.59    1.02
  -7   1  -9   17.14    1.04
   7  -1   9   17.22    3.02
  -7   1 -10    0.21    0.20
  -7  -1 -10    0.20    0.20
   7   1  10    0.47    0.93
   7  -1  10    0.50    0.73
  -7  -1 -11    0.37    0.25
  -7   1 -11    0.61    0.27
   7   1  11    0.30    0.54
   7  -1  11    0.39    0.51
  -7  -1 -12    0.67    0.29
  -7   1 -12    0.65    0.37
   7   1  12   -0.20    0.61
   7  -1  12    0.79    0.77
  -7   1 -13    1.04    0.42
   7   1  13    1.36    1.06
   7  -1  13    1.04    0.78
  -7  -1 -13    1.08    0.36
  -7   1 -14   10.13    1.18
  -7  -1 -14   10.61    1.18
   7   1  14   12.24    2.71
   7  -1  14    9.41    2.42
  -7  -1 -15    6.18    0.96
  -7   1 -15    6.39    1.00
   7   1  15    6.05    1.83
   7  -1  15    6.72    2.05
  -7   1 -16    0.42    0.32
  -7  -1 -16    0.25    0.27
  -7   1 -17    0.62    0.43
  -7  -1 -17    0.80    0.39
  -7  -1 -18    0.88    0.41
  -7  -1 -18    0.26    0.30
  -7   1 -18    0.95    0.39
  -7   1 -19    3.32    0.71
  -7  -1 -19    4.38    0.68
  -7  -1 -19    4.19    0.73
  -7   1 -20    8.05    0.97
  -7  -1 -20    7.07    0.71
  -7   1 -20    7.61    0.93
  -7   1 -21    2.11    0.39
  -7   1 -21    1.63    0.39
  -7  -3  22    0.80    0.29
  -7  -3  21    0.14    0.18
  -7  -3  20   -0.13    0.23
  -7   3  19   -0.45    0.40
  -7  -3  19    0.45    0.38
  -7  -3  18   -0.05    0.28
  -7   3  18   -0.73    0.46
  -7   3  17    0.90    0.30
  -7   3  17    0.99    0.34
  -7  -3  17    1.80    0.75
  -7   3  16   -0.39    0.41
  -7  -3  16    0.37    0.52
  -7   3  16   -0.16    0.23
  -7   3  15    1.60    0.43
  -7   3  15    2.31    0.61
  -7   3  14    0.00    0.29
  -7   3  14   -0.20    0.24
  -7  -3  14    0.42    0.46
  -7   3  13    0.96    0.46
  -7  -3  13    0.57    0.37
  -7   3  13    0.79    0.33
  -7   3  12    0.82    0.49
  -7   3  12   -0.06    0.19
  -7  -3  12   -0.62    0.41
  -7  -3  12    0.35    0.26
  -7   3  11   -0.13    0.77
  -7   3  11    0.22    0.20
  -7  -3  11    0.27    0.22
  -7   3  11    0.75    0.51
  -7  -3  11   -0.34    0.42
  -7  -3  10    8.21    0.97
  -7   3  10    6.42    0.82
  -7   3   9    1.63    0.37
  -7  -3   9    2.36    0.44
  -7   3   8    0.10    0.24
  -7   3   8    1.84    1.06
  -7   3   7    0.83    1.03
  -7   3   7    0.18    0.15
  -7   3   6    0.70    0.94
  -7   3   6    0.34    0.23
  -7   3   5   31.19    3.35
  -7   3   5   28.51    1.20
  -7   3   4    0.02    0.43
  -7   3   4    0.41    0.18
  -7  -3   4    0.39    0.33
  -7  -3   3    0.32    0.18
  -7   3   3    0.41    0.11
   7  -3  -3    0.22    0.16
  -7  -3   2    1.83    0.62
   7  -3  -2    1.72    0.44
   7  -3  -1   15.65    1.37
   7  -3  -1   12.88    1.52
  -7  -3   1   15.66    1.67
  -7  -3   0   10.32    1.45
   7  -3   0    7.97    1.29
  -7  -3  -1   14.69    1.82
   7  -3   1   17.15    2.16
   7  -3   2   21.95    2.50
   7  -3   3   11.34    1.95
   7  -3   4   22.25    2.92
   7  -3   5   -0.22    0.65
   7  -3   6   15.98    2.83
   7  -3   7   32.40    4.25
   7  -3   8   27.71    4.02
  -7  -3  -9    3.66    0.55
   7   3   9    4.15    1.59
  -7  -3  -9    3.85    0.52
  -7   3  -9    4.56    0.62
   7  -3   9    2.87    1.34
   7   3  10    3.29    1.53
  -7   3 -10    3.24    0.57
  -7  -3 -10    3.47    0.55
  -7  -3 -10    2.46    0.51
   7  -3  10    3.12    1.42
  -7  -3 -11   -0.24    0.22
  -7  -3 -11   -1.04    0.35
  -7   3 -11   -0.11    0.21
   7   3  11    0.81    1.17
   7  -3  11   -0.44    0.93
  -7  -3 -12    6.84    0.91
  -7   3 -12    6.30    0.88
   7   3  12    8.17    2.54
  -7  -3 -12    7.57    0.94
   7  -3  12    5.92    2.17
  -7  -3 -13    0.58    0.38
  -7   3 -13    0.13    0.29
  -7  -3 -13    0.21    0.22
   7   3  13    0.78    0.89
   7  -3  13   -0.04    0.62
   7   3  14    3.39    1.46
  -7   3 -14    5.21    0.85
  -7  -3 -14    6.23    0.92
  -7  -3 -14    5.05    0.87
   7  -3  14    6.07    2.12
  -7  -3 -15    0.49    0.31
  -7   3 -15    0.61    0.38
  -7  -3 -15    0.07    0.31
   7   3  15    1.00    0.99
  -7  -3 -16    2.88    0.62
  -7   3 -16    3.18    0.75
  -7  -3 -16    2.30    0.61
  -7  -3 -17    0.21    0.20
  -7   3 -17    0.01    0.22
  -7   3 -18    1.19    0.50
  -7   3 -19    0.78    0.34
  -7   3 -20    0.27    0.16
  -7   3 -21    0.36    0.18
  -7   3 -21    0.40    0.25
  -7   3 -22    0.46    0.17
  -7  -5  22    0.37    0.22
  -7  -5  21    0.39    0.22
  -7  -5  20   -0.15    0.26
  -7  -5  19    0.65    0.41
  -7  -5  18   -0.07    0.31
  -7   5  18   -0.27    0.36
  -7   5  17    1.32    0.45
  -7  -5  17    2.25    0.74
  -7   5  16    0.86    0.38
  -7  -5  16    1.75    0.70
  -7  -5  15    2.23    0.53
  -7  -5  15    2.25    0.77
  -7   5  15    1.54    0.57
  -7   5  14    1.69    0.57
  -7  -5  14    1.89    0.72
  -7  -5  14    2.00    0.57
  -7   5  13    1.22    0.55
  -7  -5  13    0.43    0.37
  -7  -5  13    0.70    0.40
  -7  -5  12    5.01    0.95
  -7  -5  12    1.48    0.45
  -7   5  12    4.86    1.90
  -7   5  12    4.57    0.88
  -7   5  11    1.83    1.15
  -7  -5  11    0.71    0.30
  -7   5  11    2.70    0.67
  -7  -5  10   -0.03    0.31
  -7   5  10    0.51    0.33
  -7   5   9    3.17    0.53
  -7  -5   9    5.32    0.76
  -7   5   8   12.69    1.05
  -7   5   8   19.93    3.29
  -7  -5   8   16.34    1.14
  -7   5   7   35.96    1.66
  -7   5   7   49.49    4.89
  -7   5   6   18.66    1.09
  -7   5   6   21.73    3.17
  -7  -5   5   27.93    2.93
  -7   5   5   28.64    3.46
   7  -5  -5   29.27    2.75
  -7   5   5   22.43    1.06
   7  -5  -4    5.94    1.24
  -7   5   4    6.14    0.48
  -7  -5   4    7.11    1.48
  -7  -5   3   40.81    3.44
   7  -5  -3   36.93    2.89
  -7   5   3   32.09    0.94
   7  -5  -2   13.05    1.72
  -7  -5   2   13.03    2.02
  -7  -5   1   42.83    3.56
   7  -5  -1   42.99    3.25
   7  -5   0    1.72    0.76
  -7  -5   0    2.10    0.77
   7  -5   1   21.23    2.88
  -7  -5  -1   28.25    3.14
  -7  -5  -2    5.58    1.45
   7  -5   2    6.48    1.56
  -7  -5  -3   12.18    2.26
   7  -5   3   10.22    2.05
   7  -5   4   20.09    3.14
   7  -5   5    2.24    1.38
   7  -5   6   13.17    2.84
  -7   5  -7   20.34    1.25
   7  -5   7   21.96    3.80
  -7   5  -8   10.87    0.98
   7  -5   8   12.09    2.85
  -7  -5  -9    0.34    0.15
  -7   5  -9    0.15    0.19
  -7   5 -10    0.00    0.17
  -7  -5 -10    0.24    0.16
   7  -5  10   -0.28    0.75
   7  -5  11    0.85    0.80
   7   5  11   -0.11    0.91
  -7   5 -11    0.64    0.29
   7  -5  12    1.36    1.13
   7   5  12    0.51    0.66
  -7   5 -12    1.03    0.42
   7  -5  13    2.03    1.49
   7   5  13    3.54    1.57
  -7   5 -13    3.24    0.71
   7  -5  14    0.35    0.88
  -7   5 -14    1.16    0.50
   7   5  14    2.54    1.39
  -7   5 -15    1.36    0.43
  -7   5 -16    0.66    0.40
  -7   5 -17    0.53    0.33
  -7   5 -18    3.11    0.62
  -7   5 -19    2.12    0.49
  -7   5 -20    1.60    0.39
  -7   5 -21    2.56    0.48
  -7   5 -21    2.08    0.38
  -7  -7  21    0.29    0.22
  -7  -7  20   -0.06    0.22
  -7  -7  19   -0.10    0.21
  -7  -7  18    2.64    0.64
  -7  -7  17    9.20    1.02
  -7   7  17    6.91    0.87
  -7  -7  17    8.16    1.24
  -7   7  16   -0.18    0.35
  -7  -7  16    0.15    0.34
  -7  -7  16   -0.07    0.25
  -7  -7  15    2.79    0.73
  -7  -7  15    4.25    0.93
  -7   7  15    2.70    0.62
  -7  -7  14    5.42    1.00
  -7  -7  14    7.22    1.18
  -7   7  14    5.27    0.87
  -7  -7  13    0.35    0.35
  -7   7  13    1.85    1.06
  -7  -7  13    0.87    0.56
  -7   7  13    0.70    0.47
  -7  -7  12   10.41    1.49
  -7   7  12    7.98    1.05
  -7  -7  12    7.04    1.03
  -7  -7  11   10.48    1.18
  -7   7  11    8.69    1.11
  -7   7  10    4.11    0.72
  -7   7  10    7.84    2.20
  -7  -7  10    7.17    0.92
  -7  -7   9    8.38    1.98
  -7   7   9    4.93    0.71
  -7   7   9    8.58    2.32
  -7  -7   9    8.65    0.91
  -7   7   8    2.19    0.41
  -7  -7   8    3.46    1.29
  -7   7   8    4.14    1.49
  -7  -7   8    3.28    0.50
  -7   7   7    1.38    1.26
  -7   7   7    0.84    0.27
  -7  -7   7    0.69    0.57
  -7   7   6    6.04    0.62
  -7   7   6    7.33    2.09
   7  -7  -6    6.67    1.73
  -7  -7   6    6.86    1.89
  -7   7   5    0.10    0.11
  -7  -7   5    0.34    0.60
  -7   7   5   -0.34    0.76
   7  -7  -5    0.20    0.35
  -7  -7   4   29.17    3.62
   7  -7  -4   22.04    2.86
   7  -7  -3   57.04    4.49
  -7  -7   3   60.56    2.34
  -7  -7   3   64.72    5.39
  -7  -7   2    7.90    1.82
   7  -7  -2    6.37    1.63
   7  -7  -1    0.04    0.56
  -7  -7   1    0.95    0.79
  -7  -7   0   21.01    3.14
   7  -7   0   17.41    2.64
  -7  -7  -1   22.90    3.30
   7  -7   1   18.33    2.71
  -7  -7  -2   33.87    4.17
  -7   7  -3    0.29    0.17
  -7  -7  -3    0.60    0.87
  -7   7  -4    4.42    0.58
  -7   7  -4    4.13    0.49
   7  -7   4    3.79    1.53
  -7  -7  -4    4.51    1.70
   7  -7   5   -0.35    0.82
  -7   7  -5   -0.01    0.18
  -7   7  -5    0.33    0.20
  -7   7  -6    0.38    0.25
  -7   7  -6    0.15    0.17
   7  -7   6   -0.01    0.45
  -7   7  -7    5.11    0.65
   7  -7   7    4.75    1.89
  -7   7  -7    4.74    0.76
   7  -7   8   16.75    3.56
  -7   7  -8   17.83    1.46
  -7   7  -9    4.93    0.77
   7  -7   9    3.97    1.63
  -7   7 -10   -0.22    0.37
   7  -7  10   -0.21    0.49
   7  -7  11    0.16    0.47
  -7   7 -11    0.63    0.37
  -7   7 -12    0.51    0.38
   7   7  12   -0.08    0.56
   7  -7  12   -0.47    0.55
  -7   7 -13    0.20    0.26
  -7   7 -14    3.52    0.78
  -7   7 -15    0.40    0.32
  -7   7 -16    0.95    0.40
  -7   7 -17    1.40    0.50
  -7   7 -18    4.84    0.74
  -7   7 -19    2.77    0.50
  -7   7 -20    0.13    0.13
  -7  -9  19    0.36    0.23
  -7  -9  18    0.60    0.22
  -7  -9  18    1.15    0.34
  -7  -9  17    1.91    0.48
  -7  -9  17    2.14    0.55
  -7  -9  16    1.57    0.51
  -7  -9  16    1.53    0.45
  -7  -9  15   -0.22    0.32
  -7   9  15    0.01    0.16
  -7   9  14    0.08    0.25
  -7  -9  14    0.22    0.61
  -7  -9  14   -0.14    0.26
  -7   9  13    1.63    0.44
  -7  -9  13    1.40    0.44
  -7  -9  13    2.84    0.96
  -7  -9  12   -0.22    0.29
  -7   9  12    0.21    0.25
  -7  -9  12    0.61    0.67
  -7   9  11    0.52    0.26
  -7   9  11   -0.61    0.87
  -7  -9  10   10.36    1.60
  -7   9  10    8.17    0.89
   7   9  -9    2.68    0.47
  -7  -9   9    3.40    1.33
  -7   9   9    1.66    1.03
   7   9  -8    1.13    0.33
  -7  -9   8    1.66    0.81
  -7   9   8    0.72    0.67
   7   9  -7    0.45    0.21
  -7   9   7    0.82    0.89
  -7  -9   7    0.11    0.46
   7  -9  -6    1.73    1.01
   7   9  -6    2.60    0.47
  -7  -9   6    2.21    1.29
  -7   9   6    2.25    1.25
  -7  -9   5    7.45    1.10
   7   9  -5    8.55    0.77
  -7  -9   5    8.22    2.36
   7  -9  -5    6.78    1.82
  -7   9   5    7.47    2.02
   7  -9  -4    0.33    0.36
   7   9  -4    0.14    0.16
  -7  -9   4    0.21    0.27
  -7  -9   4    0.16    0.46
  -7  -9   3    3.96    0.74
   7   9  -3    3.54    0.50
  -7  -9   3    5.10    1.72
   7  -9  -3    3.67    1.40
  -7  -9   2    3.67    0.65
   7  -9  -2    3.69    1.34
  -7  -9   2    4.73    1.67
  -7  -9   1    1.18    0.34
   7  -9  -1    0.60    0.45
  -7  -9   1    1.59    0.97
  -7   9   0    5.89    0.74
  -7  -9   0    5.55    0.68
   7  -9   0    4.74    1.65
  -7  -9   0    6.95    2.11
  -7  -9  -1    1.82    1.02
   7  -9   1    1.16    0.79
  -7   9  -1    1.40    0.41
  -7   9  -2    0.29    0.25
  -7   9  -2    0.31    0.12
   7  -9   2    0.03    0.58
  -7  -9  -2    0.81    0.75
   7  -9   3    2.66    1.17
  -7  -9  -3    2.02    1.39
  -7   9  -3    2.16    0.51
  -7   9  -3    2.12    0.38
  -7   9  -4    0.80    0.36
  -7   9  -4    0.38    0.20
   7  -9   4    0.29    0.58
  -7  -9  -4    0.94    1.03
  -7   9  -5    0.09    0.15
  -7   9  -5    0.09    0.19
  -7   9  -6    0.37    0.25
  -7   9  -7    2.17    0.60
  -7   9  -8    3.18    0.74
  -7   9  -9    4.39    0.84
  -7   9 -10    6.02    0.95
  -7   9 -11    0.55    0.32
  -7   9 -12    5.78    1.01
  -7   9 -13    2.22    0.63
  -7   9 -14    2.41    0.68
  -7   9 -15    0.06    0.32
  -7   9 -16    0.28    0.25
  -7   9 -17   -0.06    0.19
  -7   9 -18    0.06    0.16
  -7   9 -19    2.04    0.33
  -7 -11  17    0.12    0.13
  -7 -11  16    0.53    0.28
  -7 -11  15   -0.06    0.25
  -7 -11  14    1.87    0.64
  -7 -11  13    0.40    0.50
  -7 -11  12    2.23    0.85
  -7 -11  11    1.33    0.85
  -7 -11  10    5.15    1.28
   7  11  -9    0.16    0.21
  -7 -11   9    0.30    0.32
   7  11  -8    0.89    0.38
  -7 -11   8   -0.03    0.56
  -7  11   7    5.59    1.68
   7  11  -7    4.49    0.71
  -7 -11   7    2.76    0.65
  -7 -11   7    2.78    1.19
  -7 -11   6    0.73    0.37
   7  11  -6    1.58    0.46
  -7 -11   6    2.75    1.45
  -7  11   6    1.74    1.01
   7 -11  -5   15.70    2.74
  -7 -11   5   14.70    2.99
  -7  11   5   17.93    3.15
  -7 -11   5   18.43    1.89
   7  11  -5   19.25    1.47
   7  11  -4   16.11    1.36
  -7  11   4   16.39    3.13
  -7 -11   4   16.40    1.70
   7 -11  -4   14.75    2.68
  -7 -11   4   14.26    3.07
   7  11  -3    0.06    0.19
   7 -11  -3    0.44    0.58
  -7 -11   3    0.55    0.37
  -7 -11   3    0.48    0.99
   7  11  -2    4.55    0.72
  -7 -11   2    4.10    0.78
  -7 -11   2    3.39    1.60
   7 -11  -2    3.38    1.44
  -7 -11   1    3.35    1.59
  -7  11   1    1.87    0.52
  -7 -11   1    2.33    0.55
   7 -11  -1    2.65    1.42
  -7 -11   0    2.17    1.37
  -7  11   0    3.35    0.50
  -7  11   0    2.12    0.57
   7 -11   0    2.98    1.54
  -7 -11  -1    7.50    2.52
   7 -11   1    6.77    2.12
  -7  11  -1    6.85    1.00
  -7 -11  -2    3.82    1.93
   7 -11   2    5.01    1.84
  -7  11  -2    5.24    0.87
  -7 -11  -3    6.73    2.29
  -7  11  -3    6.55    1.04
   7 -11   3    5.09    1.84
  -7  11  -4    6.03    0.99
   7 -11   4    4.05    1.57
  -7  11  -5   -0.07    0.27
   7 -11   5    0.13    0.85
  -7  11  -6    9.83    1.28
   7 -11   6    6.99    2.11
  -7  11  -7    0.47    0.45
  -7  11  -8    0.53    0.38
  -7  11  -9    1.15    0.54
  -7  11 -10   -0.21    0.43
  -7  11 -11    0.78    0.36
  -7  11 -12    0.24    0.27
  -7  11 -13    1.15    0.46
  -7  11 -14    0.20    0.26
  -7  11 -15    1.28    0.37
  -7  11 -16    0.16    0.17
  -7  11 -17    0.10    0.10
  -7 -13  15    3.83    0.59
  -7 -13  14    0.06    0.20
  -7 -13  13    0.30    0.26
  -7 -13  12    0.90    0.45
  -7 -13  11    0.88    0.52
  -7 -13  10    0.84    0.58
  -7 -13   9   -0.18    0.31
   7  13  -8    0.18    0.29
  -7 -13   8    0.15    0.25
  -7 -13   7   -0.19    0.39
   7  13  -7    0.69    0.34
   7  13  -6    0.31    0.25
  -7 -13   6   -0.02    0.25
   7  13  -5    0.60    0.36
  -7 -13   5    0.12    0.32
   7  13  -4   -0.03    0.18
  -7  13   4   -0.17    0.32
  -7 -13   4    0.02    0.20
  -7  13   3   -0.06    0.32
  -7 -13   3    0.24    0.24
   7  13  -3    0.60    0.27
   7  13  -2    2.22    0.56
  -7  13   2    2.15    0.64
  -7 -13   2    2.25    0.57
  -7  13   1   -0.24    0.33
   7  13  -1    0.00    0.23
   7  13   0    0.47    0.27
  -7  13   0    1.01    0.51
  -7  13  -1    0.52    0.44
  -7  13  -2    0.31    0.42
  -7  13  -3    6.50    1.13
  -7  13  -4    7.20    1.15
  -7  13  -5    2.00    0.67
  -7  13  -6    9.95    1.32
  -7  13  -7    5.26    0.98
  -7  13  -8    0.37    0.26
  -7  13  -9    1.87    0.53
  -7  13 -10   -0.14    0.38
  -7  13 -11    1.77    0.50
  -7  13 -12    1.90    0.48
  -7  13 -13    0.17    0.17
  -7  13 -14    0.02    0.13
  -7 -15  11    0.53    0.25
  -7 -15  10    0.36    0.20
  -7 -15   9    1.04    0.33
  -7  15   9    1.41    0.29
  -7  15   8    1.28    0.36
  -7 -15   8    1.27    0.41
  -7 -15   7    0.48    0.34
  -7  15   7    0.10    0.15
  -7 -15   6    2.36    0.57
   7  15  -6    2.16    0.42
  -7  15   6    1.81    0.49
  -7 -15   5    1.56    0.46
  -7  15   5    1.20    0.45
   7  15  -5    2.02    0.46
  -7  15   4    4.32    0.81
   7  15  -4    5.00    0.73
  -7  15   3    5.31    0.89
   7  15  -3    6.58    0.88
   7  15  -2    0.32    0.28
  -7  15   2    0.01    0.22
  -7  15   1   -0.04    0.21
   7  15  -1    0.27    0.30
  -7  15   0    0.28    0.33
   7  15   0    0.07    0.21
  -7  15  -1    0.80    0.49
   7  15   1   -0.21    0.28
  -7  15  -2    6.36    1.00
   7  15   2    5.13    0.86
  -7  15  -3    9.54    1.21
   7  15   3    7.67    1.06
  -7  15  -4    0.51    0.39
   7  15   4    0.04    0.26
  -7  15  -5    0.16    0.27
  -7  15  -6    0.04    0.21
  -7  15  -7   -0.44    0.36
  -7  15  -8    0.61    0.23
  -7  15  -8    0.60    0.23
  -7  15  -9   -0.25    0.26
  -7  15 -10    0.15    0.17
  -7  17   2    0.40    0.24
  -7  17   1    1.30    0.33
  -7  17   0    0.40    0.24
  -7  17  -1    0.23    0.17
  -7  17  -2    0.45    0.23
  -7  17  -3    0.41    0.23
  -8   0  22    0.16    0.15
  -8   0  21    0.62    0.35
  -8   0  20   -0.03    0.21
  -8   0  19    0.54    0.30
  -8   0  18    4.53    0.87
  -8   0  17    0.00    0.21
  -8   0  16    0.36    0.34
  -8   0  15    9.92    1.30
  -8   0  14   11.86    1.24
  -8   0  14    9.38    1.21
  -8   0  13   11.77    1.16
  -8   0  13    8.01    1.07
  -8   0  12   -0.22    0.54
  -8   0  12    0.02    0.31
  -8   0  11    5.14    0.73
  -8   0  11    7.03    0.90
  -8   0  10   14.82    1.17
  -8   0  10   16.40    1.27
  -8   0   9    3.46    0.57
  -8   0   8    3.34    1.31
  -8   0   8    4.99    0.71
  -8   0   7    3.76    1.24
  -8   0   7    5.18    0.62
  -8   0   6   30.39    3.48
  -8   0   5  272.25    9.57
  -8   0   4  209.64    7.73
  -8   0   3   35.10    2.88
   8   0  -3   29.99    1.03
  -8   0   2    1.84    0.64
   8   0  -2    1.52    0.35
   8   0  -1   15.15    1.40
  -8   0   1   16.11    1.64
   8   0   0   11.35    1.41
   8   0   1   40.84    3.04
   8   0   2    5.01    1.24
   8   0   3    6.80    1.52
   8   0   4   84.63    5.67
   8   0   5    0.90    0.81
   8   0   6   10.71    2.30
   8   0   7   76.43    6.36
   8   0   8    1.26    1.15
  -8   0  -9    2.15    0.39
   8   0   9    1.95    1.07
   8   0  10    5.57    1.83
  -8   0 -10    5.99    0.70
  -8   0 -11    2.41    0.49
   8   0  11    1.05    1.20
   8   0  12    0.51    0.97
  -8   0 -12    0.23    0.22
  -8   0 -13    4.46    0.75
   8   0  13    4.63    1.84
  -8   0 -14   13.94    1.34
   8   0  14   15.10    3.17
  -8   0 -15    7.24    1.01
   8   0  15    5.80    1.94
  -8   0 -16    0.87    0.45
  -8   0 -17    0.50    0.26
  -8   0 -18    3.57    0.81
  -8   0 -18    3.96    0.77
  -8   0 -19    1.32    0.45
  -8   0 -19    1.12    0.40
  -8   0 -20    3.51    0.56
  -8   0 -20    3.86    0.67
  -8   0 -21    3.57    0.43
  -8  -2  22    1.31    0.40
  -8  -2  21    1.30    0.46
  -8   2  20    2.14    0.48
  -8  -2  20    1.37    0.43
  -8   2  19   -0.07    0.24
  -8  -2  19   -0.01    0.25
  -8  -2  18    2.06    0.63
  -8   2  18    1.81    0.50
  -8   2  17    3.77    0.72
  -8   2  17    3.89    0.73
  -8  -2  17    4.85    1.04
  -8   2  16   -0.27    0.48
  -8   2  16   -0.30    0.33
  -8  -2  16    0.57    0.47
  -8   2  15    4.17    0.79
  -8   2  15    3.38    0.71
  -8  -2  15    4.19    0.99
  -8   2  14   -0.12    0.28
  -8   2  14   -0.09    0.21
  -8  -2  14    0.36    0.48
  -8   2  13    1.12    0.37
  -8  -2  13    0.70    0.33
  -8   2  13    1.43    0.40
  -8   2  12    0.55    0.30
  -8  -2  12    0.18    0.28
  -8   2  12    0.87    0.33
  -8  -2  11    0.25    0.23
  -8   2  11    0.53    0.28
  -8   2  11    0.79    0.32
  -8   2  10    0.37    0.25
  -8   2  10   -0.16    0.58
  -8   2  10   -0.50    0.42
  -8  -2  10   -0.08    0.28
  -8   2   9   24.86    1.54
  -8  -2   9   22.80    1.46
  -8   2   8    4.11    0.62
  -8   2   8    3.48    1.45
  -8   2   7    0.98    0.98
  -8   2   7    0.78    0.31
  -8   2   6   28.32    1.32
  -8   2   6   29.82    3.69
  -8   2   5   17.01    0.94
  -8   2   5   16.48    2.56
  -8   2   4    0.63    0.61
  -8   2   4    0.63    0.19
  -8  -2   4    0.60    0.23
  -8  -2   3   20.19    1.29
  -8   2   3   19.50    2.34
   8  -2  -2    2.46    0.57
   8  -2  -2    1.59    0.27
  -8  -2   2    3.03    0.54
   8  -2  -1    5.68    0.97
   8  -2  -1    4.60    0.53
   8  -2   0    0.26    0.22
   8  -2   1    6.12    1.17
   8  -2   2    2.66    0.85
   8  -2   3   22.45    2.67
   8  -2   4   10.60    1.94
   8  -2   5    7.17    1.73
   8   2   6   10.05    2.25
   8  -2   6    8.35    2.00
   8  -2   7   40.44    4.58
   8   2   7   44.91    5.09
   8  -2   8   20.98    3.51
   8   2   8   22.01    3.71
  -8  -2  -9   14.29    1.02
  -8   2  -9   15.70    1.06
   8  -2   9   14.06    3.05
   8   2   9   15.90    3.30
  -8   2 -10    0.28    0.20
  -8  -2 -10    0.05    0.15
   8   2  10    0.25    0.77
   8  -2  10   -0.11    0.47
  -8  -2 -11    0.20    0.17
  -8   2 -11    0.41    0.28
   8   2  11   -0.05    0.66
   8  -2  11    0.12    0.59
  -8  -2 -12   17.11    1.42
  -8   2 -12   18.79    1.44
   8  -2  12   18.08    3.66
   8   2  12   19.23    3.79
  -8   2 -13    2.84    0.63
   8   2  13    2.22    1.23
   8  -2  13    2.10    1.40
  -8  -2 -13    2.48    0.57
  -8  -2 -14    1.99    0.54
  -8   2 -14    2.37    0.62
   8  -2  14    1.03    0.86
   8   2  14    2.15    1.24
  -8  -2 -14    3.55    0.78
  -8   2 -15    0.38    0.32
  -8  -2 -15    0.76    0.50
  -8  -2 -15    0.14    0.36
   8   2  15    2.09    1.19
   8  -2  15    2.13    1.27
  -8  -2 -16    1.37    0.51
  -8   2 -16    1.58    0.54
  -8  -2 -16    1.35    0.48
  -8  -2 -17    0.37    0.33
  -8   2 -17    0.15    0.29
  -8  -2 -17   -0.08    0.25
  -8  -2 -18   -0.19    0.23
  -8   2 -18   -0.25    0.25
  -8   2 -19    1.74    0.51
  -8  -2 -19    1.29    0.32
  -8   2 -20    3.34    0.59
  -8   2 -20    3.60    0.66
  -8   2 -21    2.46    0.44
  -8   2 -21    2.29    0.44
  -8  -4  22    0.47    0.26
  -8  -4  21   -0.14    0.26
  -8  -4  20   -0.13    0.29
  -8  -4  19    0.31    0.34
  -8  -4  18    1.36    0.55
  -8   4  18    0.68    0.27
  -8   4  17    1.75    0.44
  -8  -4  17    2.03    0.71
  -8   4  16   -0.11    0.40
  -8  -4  16    0.29    0.46
  -8  -4  15    0.88    0.58
  -8   4  15   -0.56    0.50
  -8  -4  14    7.56    0.93
  -8   4  14    5.87    0.94
  -8  -4  14    6.08    1.09
  -8  -4  13    1.22    0.48
  -8   4  13    2.70    0.63
  -8  -4  13    2.39    0.58
  -8   4  12    8.26    1.11
  -8  -4  12    8.62    1.05
  -8  -4  12    5.41    0.93
  -8   4  11    2.04    0.56
  -8  -4  11    1.91    0.44
  -8   4  11    1.96    1.41
  -8  -4  11    1.74    0.55
  -8   4  10    0.50    0.22
  -8  -4  10    0.87    0.35
  -8  -4  10    0.66    0.38
  -8   4  10    0.99    0.80
  -8   4   9   -0.14    0.30
  -8  -4   9    0.26    0.22
  -8   4   9    0.92    0.96
  -8  -4   9    0.12    0.15
  -8   4   8   29.06    1.58
  -8  -4   8   26.27    1.48
  -8   4   7    4.94    0.66
  -8   4   7    5.89    1.93
  -8   4   6   12.95    0.92
  -8  -4   6   13.64    1.82
  -8   4   6   14.80    2.71
  -8   4   5    4.49    1.42
  -8  -4   5    7.15    1.30
  -8   4   5    5.81    0.56
  -8   4   4    1.37    0.26
  -8   4   4    1.07    0.46
  -8  -4   4    1.89    0.60
   8  -4  -4    1.36    0.47
  -8   4   3    1.58    0.23
  -8  -4   3    2.06    0.72
   8  -4  -3    1.68    0.53
   8  -4  -2   28.86    2.09
  -8  -4   2   31.28    2.65
   8  -4  -1    0.73    0.50
   8  -4  -1    1.28    0.46
  -8  -4   1    2.05    0.68
  -8  -4   0   36.86    3.17
   8  -4   0   27.51    2.74
   8  -4   1    1.69    0.82
  -8  -4  -1    1.12    0.69
   8  -4   2    4.20    1.27
   8  -4   3   16.70    2.67
   8  -4   4    1.86    1.02
   8  -4   5    0.38    0.78
   8  -4   6    0.78    0.54
   8  -4   7   28.01    4.25
  -8   4  -7   25.47    1.25
  -8  -4  -8    0.73    0.23
  -8  -4  -8    0.72    0.27
  -8   4  -8    0.70    0.24
   8  -4   8    0.47    0.48
  -8  -4  -9    0.42    0.19
   8   4   9   -0.29    0.64
  -8   4  -9    0.59    0.27
   8  -4   9    0.72    0.52
  -8  -4  -9    0.47    0.24
   8   4  10    3.16    1.61
  -8   4 -10    3.89    0.68
  -8  -4 -10    2.69    0.54
  -8  -4 -10    3.17    0.54
   8  -4  10    3.95    1.66
  -8  -4 -11    0.37    0.21
  -8  -4 -11    0.29    0.24
   8  -4  11    0.26    0.69
  -8   4 -11    0.71    0.36
   8   4  11   -0.16    1.16
  -8  -4 -12    4.30    0.75
  -8  -4 -12    4.71    0.71
   8   4  12    5.51    2.06
  -8   4 -12    3.83    0.77
   8  -4  12    4.00    2.13
  -8   4 -13    3.33    0.72
  -8  -4 -13    3.42    0.65
   8   4  13    2.07    1.45
   8  -4  13    3.00    1.76
  -8  -4 -14    0.39    0.25
  -8   4 -14    0.23    0.19
   8  -4  14    0.44    0.70
  -8   4 -15    0.98    0.43
  -8  -4 -15    0.87    0.32
  -8   4 -16    0.06    0.23
  -8   4 -17    0.32    0.27
  -8   4 -18    0.34    0.29
  -8   4 -19    2.54    0.55
  -8   4 -20    0.89    0.31
  -8   4 -21    1.20    0.33
  -8   4 -21    0.74    0.24
  -8  -6  21    0.25    0.24
  -8  -6  20   -0.12    0.24
  -8  -6  19    1.21    0.44
  -8  -6  18    1.82    0.56
  -8  -6  17    1.89    0.66
  -8   6  17    1.19    0.40
  -8  -6  16    0.90    0.38
  -8   6  16    0.14    0.24
  -8  -6  16    0.69    0.45
  -8   6  15    2.31    0.58
  -8  -6  15    2.90    0.78
  -8  -6  15    3.19    0.74
  -8  -6  14    1.14    0.57
  -8   6  14    0.28    0.26
  -8  -6  14    0.52    0.43
  -8  -6  13    0.94    0.39
  -8  -6  13    1.72    0.64
  -8   6  13    1.19    0.41
  -8   6  13    2.13    1.19
  -8   6  12    3.03    1.35
  -8  -6  12    1.45    0.43
  -8  -6  12    2.70    0.80
  -8   6  12    2.03    0.60
  -8  -6  11   14.38    1.59
  -8   6  11   10.74    1.18
  -8  -6  11   14.54    1.44
  -8  -6  10    0.75    0.36
  -8   6  10    0.30    0.94
  -8  -6  10    0.55    0.42
  -8   6  10   -0.35    0.34
  -8  -6   9    2.07    0.55
  -8   6   9    2.05    0.36
  -8  -6   9    3.56    0.62
  -8   6   9    3.61    1.55
  -8  -6   8   29.47    3.56
  -8  -6   8   21.68    1.77
  -8   6   8   33.51    4.46
  -8   6   8   22.85    1.43
  -8  -6   8   26.76    1.51
  -8   6   7    0.15    0.20
  -8   6   7    0.16    0.71
  -8  -6   7   -0.03    0.55
  -8  -6   7    0.04    0.12
  -8  -6   7   -0.05    0.25
  -8   6   6  147.33    8.80
  -8  -6   6  135.15    7.35
  -8  -6   6  121.76    3.87
  -8   6   5    1.16    0.53
  -8   6   5    1.40    0.28
  -8  -6   5    1.30    0.65
  -8  -6   5    1.20    0.32
   8  -6  -5    0.62    0.52
   8  -6  -4    1.02    0.65
  -8   6   4    0.70    0.16
  -8  -6   4    0.66    0.47
  -8  -6   3   62.32    4.80
   8  -6  -3   56.75    3.94
   8  -6  -2    3.61    1.03
  -8  -6   2    4.73    1.33
   8  -6  -1   23.30    2.65
  -8  -6   1   26.99    3.22
  -8  -6   0    0.20    0.65
   8  -6   0    0.17    0.48
  -8  -6  -1   26.12    3.38
  -8  -6  -2   -0.08    0.61
   8  -6   2    0.10    0.51
   8  -6   3    6.36    1.85
  -8  -6  -3    7.27    1.80
   8  -6   4   -0.01    0.57
   8  -6   5    3.49    1.55
  -8   6  -5    3.11    0.47
  -8   6  -5    4.59    0.57
   8  -6   6    0.38    0.52
  -8   6  -6    1.17    0.38
  -8   6  -6    0.64    0.27
   8  -6   7    4.00    1.62
  -8   6  -7    4.33    0.64
  -8   6  -7    4.07    0.63
   8  -6   8   32.16    4.89
  -8   6  -8   34.95    1.91
   8  -6   9    9.00    2.58
  -8   6  -9    9.01    1.00
   8  -6  10   -0.27    0.49
  -8   6 -10    0.21    0.19
   8  -6  11    1.06    1.20
  -8   6 -11    0.39    0.27
   8   6  11   -0.71    1.27
   8   6  12    0.17    0.53
   8  -6  12    0.77    0.45
  -8   6 -12   -0.01    0.21
   8  -6  13    0.41    0.43
  -8   6 -13    1.14    0.46
   8   6  13    1.11    0.97
  -8   6 -14    0.88    0.41
  -8   6 -15    0.12    0.34
  -8   6 -16    2.17    0.67
  -8   6 -17    0.26    0.28
  -8   6 -18    0.24    0.19
  -8   6 -19    3.77    0.60
  -8   6 -20    0.69    0.22
  -8  -8  19    0.50    0.31
  -8  -8  18    1.08    0.35
  -8  -8  17    0.36    0.21
  -8  -8  17    0.84    0.33
  -8   8  16    0.55    0.22
  -8  -8  16    0.55    0.34
  -8   8  15   -0.31    0.30
  -8  -8  15   -0.24    0.26
  -8  -8  15    0.26    0.35
  -8   8  14   -0.18    0.28
  -8  -8  14   -0.26    0.26
  -8  -8  14    0.37    0.39
  -8  -8  13    3.32    0.93
  -8  -8  13    1.86    0.53
  -8   8  13    1.91    0.48
  -8   8  12    0.05    0.19
  -8   8  12    0.87    0.76
  -8  -8  12    0.08    0.19
  -8  -8  12    1.07    0.70
  -8   8  11    1.44    0.39
  -8  -8  11    2.61    0.60
  -8  -8  11    3.59    1.04
  -8   8  11    3.97    1.69
  -8   8  10    1.55    0.35
  -8  -8  10    4.52    0.73
  -8  -8  10    3.30    0.92
  -8   8  10    4.46    1.66
  -8  -8   9    2.70    0.70
  -8   8   9    3.80    0.61
  -8   8   9    5.69    1.92
  -8  -8   9    5.88    0.74
  -8  -8   8   -1.11    0.79
  -8   8   8    0.63    0.93
  -8   8   8    0.27    0.25
  -8  -8   8    0.40    0.92
  -8   8   7    0.51    0.85
  -8  -8   7    0.24    0.80
  -8  -8   7    0.25    0.33
   8  -8  -6    0.34    0.49
  -8  -8   6   -0.24    0.73
  -8  -8   6    0.26    0.32
  -8   8   6   -0.04    0.59
  -8  -8   5    4.93    0.89
  -8  -8   5    5.36    1.73
   8  -8  -5    4.45    1.40
  -8   8   5    5.26    1.74
   8  -8  -4    3.29    1.21
  -8  -8   4    4.60    0.80
  -8  -8   4    4.01    1.51
  -8  -8   3    8.78    1.04
  -8  -8   3    9.29    2.24
   8  -8  -3    6.58    1.72
  -8  -8   2    6.71    0.85
   8  -8  -2    5.23    1.54
  -8  -8   2    5.24    1.74
  -8  -8   1    2.89    0.52
   8  -8  -1    2.01    1.10
  -8  -8   1    2.03    0.92
  -8  -8   0    4.73    1.67
  -8   8   0    4.75    0.57
  -8  -8   0    4.68    0.62
   8  -8   0    4.81    1.64
  -8  -8  -1    1.10    0.84
   8  -8   1    0.92    0.76
  -8   8  -1    1.14    0.30
  -8  -8  -1    0.91    0.24
  -8  -8  -2    0.30    0.66
  -8   8  -2    0.21    0.11
  -8   8  -2    0.40    0.20
   8  -8   2    0.66    0.58
   8  -8   3   10.98    2.51
  -8   8  -3   12.11    1.04
  -8   8  -3   10.48    0.88
  -8  -8  -3   12.85    2.94
  -8   8  -4    7.59    0.80
  -8   8  -4    8.44    0.92
  -8   8  -5    3.79    0.66
  -8   8  -5    3.12    0.54
  -8   8  -6    1.55    0.40
  -8   8  -6    1.56    0.46
  -8   8  -7    7.22    1.00
  -8   8  -8   36.50    2.31
   8  -8   8   33.45    5.30
  -8   8  -9   15.65    1.51
   8  -8   9   14.46    3.53
  -8   8 -10    2.40    0.57
   8  -8  10    2.91    1.51
  -8   8 -11    2.09    0.58
  -8   8 -12    1.10    0.49
  -8   8 -13   -0.27    0.32
  -8   8 -14    2.98    0.73
  -8   8 -15    0.48    0.30
  -8   8 -16    0.09    0.20
  -8   8 -17    0.40    0.27
  -8   8 -18    0.49    0.23
  -8   8 -19    1.05    0.27
  -8 -10  17   -0.06    0.16
  -8 -10  16    0.22    0.24
  -8 -10  15    2.25    0.70
  -8 -10  14   -0.16    0.35
  -8 -10  13    3.53    0.91
  -8 -10  12    1.21    0.69
  -8 -10  11    3.52    1.04
  -8 -10  10    8.85    1.55
  -8 -10   9    1.35    0.57
  -8  10   9    3.03    1.24
  -8  10   8    2.86    1.20
  -8 -10   8    0.91    0.48
  -8 -10   7   -0.58    0.64
  -8  10   7    0.51    0.75
  -8 -10   7    1.09    1.08
  -8  10   6    1.94    1.19
  -8 -10   6    3.03    1.47
   8  10  -6    2.90    0.49
  -8 -10   6    2.49    0.69
  -8  10   5    1.52    1.02
   8  10  -5    1.17    0.33
  -8 -10   5    1.05    0.46
  -8 -10   5    0.92    1.00
   8  10  -4   13.77    1.06
  -8 -10   4   12.03    2.77
   8 -10  -4   11.40    2.48
  -8 -10   4   13.91    1.55
  -8 -10   3    0.50    0.35
   8  10  -3    0.46    0.21
  -8 -10   3    0.04    0.81
   8 -10  -3    0.10    0.33
  -8 -10   2    0.50    0.34
  -8 -10   2    0.22    0.77
   8 -10  -2    0.08    0.66
  -8 -10   1    4.48    1.91
  -8  10   1    4.32    0.70
   8 -10  -1    3.84    1.37
  -8 -10   1    5.38    0.81
  -8 -10   0    0.87    0.78
  -8  10   0    0.30    0.17
  -8 -10   0    0.72    0.30
   8 -10   0    1.35    1.16
  -8 -10  -1    4.50    1.78
   8 -10   1    4.89    1.76
  -8  10  -1    4.91    0.60
  -8  10  -1    4.95    0.81
  -8  10  -2    1.72    0.36
  -8 -10  -2    3.80    1.83
   8 -10   2    1.93    1.10
  -8  10  -2    3.05    0.65
  -8  10  -3    1.08    0.45
   8 -10   3   -0.42    0.95
  -8 -10  -3    0.92    0.85
  -8  10  -3    0.23    0.22
  -8  10  -4    0.28    0.18
   8 -10   4    0.12    0.61
  -8  10  -4    0.61    0.39
  -8  10  -5    1.10    0.44
   8 -10   5    0.74    0.62
  -8  10  -5    0.93    0.26
  -8  10  -6    0.22    0.34
   8 -10   6   -0.31    1.16
   8 -10   7   -0.35    0.64
  -8  10  -7    1.06    0.47
  -8  10  -8   -0.05    0.26
  -8  10  -9    2.09    0.59
  -8  10 -10   -0.38    0.39
  -8  10 -11   -0.85    0.47
  -8  10 -12    0.07    0.21
  -8  10 -13    0.32    0.29
  -8  10 -14   -0.05    0.24
  -8  10 -15    1.83    0.47
  -8  10 -16    0.50    0.25
  -8  10 -17   -0.15    0.14
  -8 -12  16    0.69    0.25
  -8 -12  15    3.43    0.68
  -8 -12  14    0.15    0.21
  -8 -12  13    1.35    0.54
  -8 -12  12   -0.03    0.29
  -8 -12  11    0.36    0.43
  -8 -12  10    0.36    0.37
  -8 -12   9   -0.33    0.49
  -8 -12   8    0.21    0.53
  -8 -12   7    0.44    0.36
   8  12  -6    0.76    0.33
  -8 -12   6    0.56    0.44
   8  12  -5    5.35    0.78
  -8 -12   5    4.49    0.94
   8  12  -4    3.91    0.70
  -8  12   4    3.79    0.71
  -8 -12   4    3.65    0.85
   8  12  -3    0.78    0.32
  -8  12   3    0.58    0.30
  -8 -12   3    0.66    0.35
  -8 -12   2   -0.47    0.80
  -8 -12   2    0.28    0.29
   8  12  -2   -0.08    0.23
  -8  12   2   -0.09    0.27
  -8 -12   1    2.90    1.25
  -8  12   1    2.53    0.65
  -8 -12   1    2.63    0.56
  -8  12   1    1.92    0.45
   8  12  -1    2.30    0.54
  -8  12   0    2.58    0.65
  -8 -12   0    2.07    1.12
   8 -12   0    1.57    1.03
  -8  12  -1    0.34    0.40
   8 -12   1    1.40    0.65
  -8  12  -2    0.28    0.40
  -8  12  -3    0.71    0.52
  -8  12  -4    5.96    1.02
  -8  12  -5    1.31    0.53
  -8  12  -6    4.70    0.90
  -8  12  -7    0.66    0.35
  -8  12  -8    0.61    0.41
  -8  12  -9   -0.26    0.50
  -8  12 -10    4.07    0.82
  -8  12 -11    1.09    0.49
  -8  12 -12    4.74    0.78
  -8  12 -13   -0.08    0.19
  -8  12 -14    0.30    0.21
  -8  12 -15    1.08    0.29
  -8 -14  13    0.66    0.29
  -8 -14  12    0.20    0.20
  -8 -14  11   -0.29    0.28
  -8 -14  10   -0.66    0.46
  -8 -14   9    1.52    0.51
  -8  14   9    1.29    0.36
  -8  14   8    5.22    0.74
  -8 -14   8    5.58    0.99
  -8  14   7    0.00    0.22
  -8 -14   7    0.51    0.39
  -8  14   6    5.64    0.87
  -8 -14   6    6.82    1.11
   8  14  -5    4.28    0.66
  -8  14   5    3.07    0.67
  -8 -14   5    3.22    0.74
   8  14  -4    5.55    0.77
  -8 -14   4    3.94    0.78
  -8  14   4    4.32    0.85
  -8 -14   3    4.16    0.70
   8  14  -3    4.08    0.70
  -8  14   3    3.56    0.74
   8  14  -2    0.54    0.31
  -8  14   2    0.35    0.32
  -8  14   1    0.17    0.30
   8  14  -1   -0.16    0.26
   8  14   0    0.57    0.28
  -8  14   0    0.83    0.42
  -8  14  -1    0.98    0.49
   8  14   1    0.80    0.35
  -8  14  -2    2.42    0.69
   8  14   2    1.42    0.39
  -8  14  -3    2.15    0.64
  -8  14  -4    3.94    0.82
  -8  14  -5    0.61    0.44
  -8  14  -6    0.76    0.41
  -8  14  -7    2.04    0.56
  -8  14  -8    1.47    0.42
  -8  14  -8    1.18    0.39
  -8  14  -9    0.30    0.18
  -8  14  -9    0.41    0.27
  -8  14 -10    1.27    0.41
  -8  14 -11    0.37    0.23
  -8  14 -12    1.19    0.31
  -8  16   6    1.92    0.37
  -8  16   5    1.17    0.32
  -8  16   5    0.92    0.27
  -8  16   4    0.82    0.30
  -8  16   4    0.67    0.30
  -8  16   3    1.74    0.42
   8  16  -2    1.21    0.31
  -8  16   2    1.80    0.52
   8  16  -1    1.72    0.37
  -8  16   1    1.66    0.51
  -8  16   0    3.60    0.64
   8  16   0    4.03    0.56
  -8  16  -1    0.13    0.25
   8  16   1    0.41    0.22
  -8  16  -2    0.06    0.19
   8  16   2    0.29    0.22
   8  16   3    3.26    0.53
  -8  16  -3    3.65    0.64
   8  16   4    0.03    0.12
  -8  16  -4    0.19    0.19
  -8  16  -5    1.40    0.39
  -8  16  -5    1.33    0.38
   8  16   5    0.93    0.26
  -8  16  -6   -0.24    0.21
  -8  16  -6    0.36    0.22
   8  16   6   -0.26    0.20
  -8  16  -7   -0.03    0.13
  -9  -1  22    0.12    0.15
  -9  -1  21    0.58    0.34
  -9   1  21    0.25    0.22
  -9  -1  20    2.75    0.67
  -9   1  20    3.45    0.69
  -9  -1  19    0.12    0.28
  -9   1  19    0.02    0.25
  -9   1  18    0.96    0.37
  -9  -1  18    0.87    0.43
  -9   1  17    0.30    0.27
  -9  -1  17    0.37    0.35
  -9   1  16    0.81    0.36
  -9  -1  16    1.78    0.58
  -9   1  15   12.90    1.39
  -9   1  15   10.76    1.31
  -9  -1  15   11.48    1.51
  -9  -1  14    0.28    0.27
  -9   1  14    0.55    0.31
  -9   1  14   -0.14    0.62
  -9  -1  13    1.54    0.46
  -9   1  13    1.90    0.28
  -9   1  13    2.48    0.58
  -9   1  12    0.91    0.31
  -9   1  12   -0.28    0.61
  -9  -1  12    0.29    0.27
  -9   1  11    2.47    0.55
  -9   1  11    0.83    0.42
  -9  -1  11    1.98    0.53
  -9   1  10    0.34    0.22
  -9   1  10   -0.28    0.37
  -9  -1  10    0.29    0.26
  -9   1   9   10.40    1.02
  -9   1   9    8.08    0.81
  -9  -1   9    7.95    0.86
  -9   1   8    1.42    0.43
  -9   1   8    0.66    0.92
  -9   1   7    4.61    0.63
  -9   1   7    2.97    1.31
  -9   1   6    3.50    1.36
  -9  -1   6    2.93    0.93
  -9   1   5   22.28    2.91
  -9  -1   5   16.93    2.47
  -9   1   4   35.78    3.49
  -9  -1   4   33.43    3.19
   9  -1  -3    1.33    0.28
  -9   1   3    2.04    0.85
   9   1  -3    1.23    0.32
  -9  -1   3    1.61    0.66
   9  -1  -2   44.69    2.16
   9   1  -2   40.65    2.41
  -9  -1   2   42.44    2.93
  -9   1   2   45.87    3.33
  -9  -1   1    0.82    0.41
   9   1  -1    0.06    0.37
   9  -1  -1    0.39    0.25
   9   1   0   10.60    1.59
   9  -1   0   10.71    1.37
  -9  -1   0   10.36    1.23
   9   1   1   16.61    2.13
   9  -1   1   18.97    2.03
  -9  -1  -1   17.74    1.27
   9   1   2   54.90    4.24
   9  -1   2   61.82    4.01
  -9  -1  -2   55.67    1.96
   9   1   3    5.38    1.41
   9  -1   3    5.98    1.34
   9   1   4   14.69    2.51
   9  -1   4   15.45    2.40
   9   1   5    1.01    0.82
   9  -1   5    0.88    0.69
   9   1   6    4.81    1.58
   9  -1   6    2.94    1.30
   9  -1   7   40.74    4.64
   9   1   7   48.59    5.37
   9   1   8   17.55    3.36
   9  -1   8   19.52    3.38
  -9  -1  -9    0.01    0.10
  -9   1  -9    0.04    0.10
   9  -1   9    0.42    0.92
   9   1   9    0.22    0.58
  -9   1 -10    1.17    0.34
  -9  -1 -10    1.35    0.35
   9   1  10    1.19    1.09
   9  -1  10    1.44    1.15
  -9  -1 -11    0.21    0.24
  -9   1 -11    0.54    0.31
   9   1  11   -0.32    0.74
   9  -1  11   -0.23    0.45
  -9  -1 -12   10.20    1.10
   9   1  12   10.63    2.90
   9  -1  12   10.88    2.97
  -9   1 -12   11.19    1.13
   9   1  13   13.89    3.09
   9  -1  13   12.97    3.12
  -9   1 -13   14.69    1.33
  -9  -1 -13   14.20    1.36
  -9  -1 -14    4.74    0.85
  -9   1 -14    5.08    0.86
   9   1  14    5.78    1.97
   9  -1  14    4.30    1.90
  -9  -1 -15    2.44    0.54
   9  -1  15    1.26    0.81
  -9   1 -15    2.81    0.65
  -9  -1 -15    3.78    0.88
   9   1  15    1.96    0.91
  -9  -1 -16    2.92    0.66
  -9   1 -16    3.26    0.71
  -9  -1 -16    3.76    0.88
  -9  -1 -17    0.57    0.38
  -9  -1 -17    0.25    0.26
  -9   1 -17    0.25    0.26
  -9  -1 -18    5.48    0.87
  -9   1 -18    5.77    0.88
  -9  -1 -18    5.87    0.87
  -9   1 -18    5.39    1.04
  -9  -1 -19    3.01    0.53
  -9   1 -19    3.16    0.66
  -9   1 -19    3.22    0.64
  -9   1 -20    0.97    0.34
  -9   1 -20    0.42    0.22
  -9  -1 -20    0.55    0.21
  -9   1 -21    2.60    0.39
  -9  -3  22    1.73    0.42
  -9  -3  21    1.46    0.46
  -9  -3  20    0.51    0.34
  -9  -3  19   -0.47    0.45
  -9  -3  18    0.20    0.27
  -9   3  17    1.44    0.48
  -9  -3  17    0.91    0.45
  -9   3  17    0.53    0.23
  -9   3  16    1.83    0.50
  -9  -3  16    2.73    0.80
  -9   3  16    2.15    0.45
  -9   3  15   -0.09    0.50
  -9  -3  15   -0.05    0.29
  -9   3  15   -0.14    0.26
  -9   3  14    0.27    0.20
  -9   3  14    0.39    0.37
  -9  -3  14    0.58    0.43
  -9   3  13   -0.01    0.27
  -9  -3  13   -0.53    0.41
  -9   3  12    1.89    0.52
  -9  -3  12    2.34    0.56
  -9  -3  12    3.23    0.56
  -9   3  12    5.16    1.99
  -9   3  12    4.69    0.70
  -9   3  11    1.26    0.39
  -9  -3  11    0.94    0.37
  -9   3  11    1.15    1.04
  -9   3  11    0.26    0.39
  -9  -3  11    0.82    0.35
  -9  -3  10    0.19    0.16
  -9   3  10    0.66    0.31
  -9   3  10   -0.21    0.37
  -9  -3  10    1.17    0.41
  -9   3  10    1.28    1.00
  -9   3   9    5.68    0.76
  -9  -3   9    3.74    0.57
  -9   3   9    5.02    1.84
  -9  -3   9    5.68    0.77
  -9   3   8    0.18    0.56
  -9  -3   8    0.04    0.15
  -9   3   8    0.38    0.32
  -9   3   7    0.50    0.35
  -9   3   7    0.85    0.88
  -9  -3   6    4.22    0.77
  -9   3   6    5.16    1.74
  -9   3   6    4.52    0.60
  -9   3   5    0.15    0.14
  -9  -3   5    0.22    0.28
  -9   3   5    0.56    0.76
  -9  -3   4   18.61    1.58
  -9   3   4   19.13    2.70
   9  -3  -3    0.32    0.17
  -9  -3   3    0.60    0.27
   9  -3  -2    5.54    0.66
   9  -3  -2    5.68    1.03
  -9  -3   2    5.21    0.93
   9  -3  -1    4.97    0.97
  -9  -3   1    6.23    1.09
   9  -3  -1    4.58    0.69
   9  -3   0    0.30    0.51
   9  -3   1   21.73    2.54
   9  -3   2    4.69    1.29
   9  -3   3   11.09    2.05
   9  -3   4    0.31    0.50
   9  -3   5    7.05    1.85
   9  -3   6    0.41    0.78
   9   3   7   19.30    3.43
   9  -3   7   16.44    3.21
  -9   3  -8    5.17    0.62
   9   3   8    4.76    1.68
  -9  -3  -8    4.07    0.57
   9  -3   8    3.90    1.60
  -9  -3  -8    3.78    0.50
   9   3   9   17.29    3.60
   9  -3   9   15.85    3.47
  -9   3  -9   16.32    1.19
  -9  -3  -9   13.38    1.06
  -9  -3  -9   12.47    1.13
  -9  -3 -10    2.92    0.55
  -9  -3 -10    2.17    0.47
   9   3  10    2.28    1.49
  -9   3 -10    2.78    0.55
   9  -3  10    2.03    1.30
  -9  -3 -11    0.62    0.32
  -9  -3 -11    0.32    0.23
  -9   3 -11    0.38    0.22
   9   3  11    1.20    1.20
   9  -3  11    0.98    0.99
  -9  -3 -12    2.50    0.56
  -9   3 -12    2.72    0.62
   9   3  12    3.53    1.67
  -9  -3 -12    3.74    0.71
   9  -3  12    1.94    1.35
  -9  -3 -13    0.36    0.34
  -9  -3 -13   -0.06    0.27
  -9   3 -13    0.14    0.23
   9   3  13    0.78    1.14
   9  -3  13    0.28    0.49
  -9   3 -14    2.87    0.70
   9   3  14    3.00    1.37
  -9  -3 -14    2.41    0.59
  -9  -3 -14    3.79    0.76
   9  -3  14    2.74    1.47
  -9   3 -15    6.14    0.97
  -9  -3 -15    6.18    0.98
  -9  -3 -15    5.88    0.91
  -9  -3 -16    0.49    0.27
  -9   3 -16    0.72    0.40
  -9   3 -17   -0.10    0.22
  -9  -3 -17    0.21    0.15
  -9   3 -18    0.19    0.20
  -9  -3 -18   -0.16    0.19
  -9   3 -19   -0.06    0.24
  -9   3 -20    0.52    0.29
  -9   3 -20    0.02    0.14
  -9   3 -21    2.07    0.37
  -9   3 -21    1.72    0.36
  -9  -5  21    1.51    0.46
  -9  -5  20    0.03    0.24
  -9  -5  19    0.23    0.28
  -9  -5  18   -0.01    0.34
  -9   5  17   -0.06    0.36
  -9  -5  17    1.17    0.53
  -9  -5  16    0.60    0.40
  -9   5  16    0.31    0.31
  -9   5  15    0.84    0.39
  -9  -5  15    1.15    0.46
  -9  -5  15    1.24    0.38
  -9  -5  14    1.23    0.44
  -9   5  14    1.27    0.29
  -9  -5  14    1.17    0.45
  -9   5  13    0.26    0.25
  -9  -5  13   -0.08    0.39
  -9   5  13    0.90    0.74
  -9  -5  13    1.10    0.43
  -9   5  12    0.35    0.55
  -9   5  12   -0.62    0.39
  -9  -5  12   -0.30    0.48
  -9  -5  12   -0.08    0.21
  -9  -5  11   11.80    1.40
  -9   5  11    8.03    1.00
  -9   5  11   18.62    3.55
  -9  -5  11   14.42    1.47
  -9   5  10    0.00    0.64
  -9   5  10   -0.23    0.42
  -9  -5  10    0.17    0.21
  -9  -5  10    0.15    0.27
  -9   5   9    1.35    1.01
  -9   5   9    1.18    0.32
  -9  -5   9    0.90    0.33
  -9  -5   9    1.46    0.43
  -9   5   8    3.42    0.58
  -9   5   8    4.17    1.65
  -9  -5   8    2.23    0.54
  -9  -5   8    3.27    0.56
  -9  -5   7    8.79    1.04
  -9   5   7    9.33    2.47
  -9   5   7    8.83    0.84
  -9  -5   7   10.64    1.73
  -9  -5   7    8.93    0.81
  -9   5   6   36.29    1.56
  -9  -5   6   41.26    2.12
  -9  -5   6   44.66    3.76
  -9  -5   5   42.90    3.60
  -9   5   5   33.53    1.36
  -9   5   5   41.59    4.56
   9  -5  -4    1.47    0.52
  -9   5   4    1.27    0.23
  -9  -5   4    1.28    0.51
  -9  -5   3    0.97    0.58
   9  -5  -3    0.76    0.45
   9  -5  -2    3.46    0.82
  -9  -5   2    3.74    1.04
  -9  -5   1    1.95    0.83
   9  -5  -1    2.78    0.86
   9  -5   0   12.07    1.73
  -9  -5   0   14.55    2.28
   9  -5   0   10.62    2.02
   9  -5   1    0.23    0.40
  -9  -5  -1    0.37    0.59
   9  -5   2   24.46    3.22
   9  -5   3    4.31    1.51
   9  -5   4    1.40    0.89
   9  -5   5    0.43    0.66
  -9   5  -5    0.81    0.28
  -9   5  -6    0.46    0.20
  -9  -5  -6    0.49    0.19
  -9   5  -6    0.60    0.29
   9  -5   6   -0.06    0.52
  -9   5  -7    0.60    0.20
  -9   5  -7    0.92    0.24
  -9  -5  -7    0.94    0.26
  -9   5  -7    0.39    0.24
   9  -5   7    0.02    0.60
  -9   5  -8    1.76    0.44
  -9  -5  -8    1.33    0.33
   9  -5   8    1.01    1.11
   9  -5   9   15.29    3.50
  -9   5  -9   14.67    1.27
  -9  -5  -9   14.69    1.05
  -9   5 -10    0.27    0.22
   9   5  10   -0.04    0.58
   9  -5  10    0.84    1.16
  -9  -5 -10    0.09    0.14
  -9   5 -11    0.09    0.18
  -9  -5 -11    0.08    0.13
   9  -5  12   -0.35    1.03
  -9   5 -12    0.84    0.41
  -9  -5 -12    0.09    0.18
   9   5  12    0.44    1.24
   9  -5  13    0.28    0.42
  -9   5 -13    1.14    0.47
   9   5  13    1.54    1.41
  -9  -5 -13    0.39    0.20
  -9   5 -14    4.53    0.89
  -9   5 -15    2.40    0.66
  -9   5 -16    2.01    0.59
  -9   5 -17   -0.06    0.19
  -9   5 -18    0.27    0.24
  -9   5 -19    3.61    0.62
  -9   5 -20    0.52    0.28
  -9   5 -20    0.38    0.19
  -9  -7  20   -0.10    0.16
  -9  -7  19    0.59    0.40
  -9  -7  18    0.05    0.31
  -9  -7  17    0.27    0.24
  -9  -7  16    3.51    0.78
  -9   7  16    3.28    0.60
  -9  -7  16    5.39    0.88
  -9  -7  15   -0.38    0.38
  -9   7  15   -0.16    0.30
  -9  -7  15    0.05    0.24
  -9  -7  14   -0.23    0.41
  -9   7  14   -0.34    0.32
  -9  -7  14    0.14    0.28
  -9   7  13    0.59    0.20
  -9  -7  13    1.04    0.39
  -9   7  12    0.76    0.28
  -9  -7  12    0.66    0.34
  -9   7  12    1.69    1.35
  -9  -7  12    1.87    0.72
  -9  -7  11   11.91    1.58
  -9   7  11   16.06    3.36
  -9   7  11    7.39    0.96
  -9  -7  11   13.55    1.44
  -9   7  10    7.10    2.22
  -9  -7  10    4.37    0.97
  -9   7  10    3.93    0.65
  -9  -7  10    7.25    0.97
  -9   7   9    1.96    0.45
  -9  -7   9    2.78    0.59
  -9  -7   9    1.13    0.43
  -9   7   9    1.64    1.05
  -9   7   8    6.22    2.21
  -9  -7   8    4.25    0.77
  -9   7   8    4.93    0.68
  -9  -7   8    6.45    0.76
  -9   7   7    1.71    1.23
  -9  -7   7    2.01    0.40
  -9  -7   7    1.59    0.90
  -9  -7   7    1.48    0.49
  -9   7   7    1.46    0.33
  -9   7   6    3.98    1.61
  -9  -7   6    4.14    0.79
  -9  -7   6    3.45    1.33
  -9  -7   5   10.97    2.18
  -9   7   5    9.50    2.51
  -9  -7   5    9.89    1.19
  -9  -7   4    8.97    2.02
   9  -7  -4    7.75    1.62
  -9  -7   4    8.62    1.06
  -9  -7   3   17.24    2.76
   9  -7  -3   14.20    2.09
  -9  -7   3   17.22    1.44
  -9  -7   2    9.05    2.01
  -9  -7   2    8.77    0.95
   9  -7  -2    7.94    1.67
  -9  -7   1    1.96    0.45
   9  -7  -1    2.09    0.96
  -9  -7   1    2.05    1.00
   9  -7   0   10.10    1.92
  -9  -7   0   10.29    0.87
  -9  -7   0   12.29    2.39
   9  -7   1    0.27    0.37
  -9  -7  -1    0.82    0.95
  -9  -7  -2    0.76    0.72
  -9   7  -2    0.77    0.24
  -9   7  -2    0.45    0.22
  -9   7  -3   22.79    1.25
  -9   7  -3   25.97    1.38
  -9   7  -4   15.99    1.13
  -9   7  -4   17.63    1.17
   9  -7   4   15.68    3.15
  -9   7  -5    7.19    0.84
  -9   7  -5    6.50    0.77
  -9  -7  -5    7.16    0.65
   9  -7   5    7.34    2.26
  -9   7  -6    7.56    0.91
  -9   7  -6    7.18    0.86
  -9  -7  -6    7.61    0.69
   9  -7   6    7.09    2.33
   9  -7   7    0.85    1.04
  -9   7  -7    1.02    0.38
  -9   7  -7    0.81    0.36
   9  -7   8    5.56    2.21
  -9   7  -8    6.34    0.87
   9  -7   9    4.14    1.94
  -9   7  -9    6.30    0.87
   9  -7  10    0.43    0.86
  -9   7 -10   -0.33    0.32
   9  -7  11    0.41    0.43
   9   7  11   -0.08    0.84
  -9   7 -11    0.55    0.36
  -9   7 -12    0.21    0.26
  -9   7 -13    1.34    0.54
  -9   7 -14    3.96    0.81
  -9   7 -15    2.05    0.58
  -9   7 -16    1.19    0.47
  -9   7 -17    0.90    0.38
  -9   7 -18    0.20    0.21
  -9   7 -19    1.78    0.49
  -9   7 -19    1.22    0.33
  -9  -9  18    0.33    0.25
  -9  -9  17    0.47    0.30
  -9  -9  17   -0.23    0.25
  -9  -9  16    0.79    0.41
  -9  -9  16    0.52    0.33
  -9  -9  15    1.61    0.56
  -9  -9  15    1.33    0.49
  -9  -9  14   -0.12    0.32
  -9  -9  14    0.16    0.27
  -9  -9  13    0.85    0.31
  -9  -9  13    1.98    0.77
  -9  -9  12    5.35    1.19
  -9  -9  12    4.94    0.78
  -9  -9  11    0.19    0.47
  -9  -9  10    1.38    0.69
  -9   9  10    1.02    0.91
  -9  -9   9    0.43    0.34
  -9   9   9    2.18    1.27
  -9  -9   8   -0.78    0.63
  -9   9   8    0.34    0.65
  -9   9   7    3.09    1.45
  -9  -9   7    3.97    0.91
  -9   9   6    0.01    0.55
  -9  -9   6    0.26    0.34
  -9  -9   6   -1.23    0.83
  -9   9   5    2.06    1.09
  -9  -9   5    1.75    0.59
  -9  -9   5    1.45    1.08
  -9  -9   4    6.58    1.04
  -9  -9   4    5.96    1.83
  -9  -9   3    9.14    1.20
  -9  -9   3    7.54    2.07
   9  -9  -3    6.80    1.66
  -9   9   2   -0.37    0.24
  -9  -9   2    0.22    0.24
   9  -9  -2    0.42    0.65
  -9  -9   2   -0.09    0.54
  -9  -9   1    0.23    0.85
  -9   9   1   -0.21    0.24
  -9  -9   1    0.43    0.32
   9  -9  -1   -0.07    0.37
  -9  -9   0    1.86    1.18
  -9   9   0    1.84    0.43
  -9  -9   0    2.06    0.47
   9  -9   0    2.33    1.22
  -9  -9  -1    0.48    0.79
  -9   9  -1    0.48    0.26
  -9  -9  -1    0.52    0.21
  -9   9  -1    0.04    0.20
   9  -9   1    0.48    0.41
  -9  -9  -2    9.15    2.41
  -9   9  -2    9.39    0.99
   9  -9   2    7.96    2.16
  -9   9  -2    8.81    0.86
  -9   9  -3    2.41    0.56
   9  -9   3    1.83    0.86
  -9   9  -3    1.33    0.40
  -9   9  -4   -0.13    0.15
  -9   9  -4    0.34    0.26
   9  -9   4    0.10    0.51
  -9   9  -5    0.36    0.30
  -9   9  -5    0.01    0.15
   9  -9   5   -0.42    0.66
  -9   9  -6    0.39    0.33
  -9   9  -6    0.16    0.19
  -9   9  -7    7.19    1.04
  -9   9  -8   31.17    2.19
  -9   9  -9   18.79    1.70
  -9   9 -10    1.54    0.49
  -9   9 -11    0.80    0.39
  -9   9 -12    0.37    0.31
  -9   9 -13   -0.01    0.20
  -9   9 -14    2.75    0.70
  -9   9 -15    1.26    0.41
  -9   9 -16    1.07    0.34
  -9   9 -17   -0.06    0.18
  -9   9 -18    0.49    0.20
  -9   9 -18    0.33    0.15
  -9 -11  16    0.11    0.19
  -9 -11  15    0.77    0.43
  -9 -11  14    0.86    0.47
  -9 -11  13    5.76    1.07
  -9 -11  12    0.46    0.41
  -9 -11  11    0.40    0.50
  -9 -11  10    4.96    1.19
  -9 -11   9   15.68    1.95
  -9 -11   8   -0.18    0.45
  -9 -11   7    5.84    1.17
  -9 -11   6    0.14    0.31
  -9  11   5   -0.23    0.83
  -9 -11   5    0.40    0.36
  -9 -11   4   18.51    3.14
  -9  11   4   20.29    3.56
  -9 -11   4   21.40    2.03
   9  11  -3   10.43    0.98
  -9  11   3    9.50    1.14
  -9 -11   3    9.70    1.29
  -9 -11   3    7.91    2.20
  -9 -11   2    0.65    0.40
  -9  11   2    0.19    0.21
   9  11  -2    0.40    0.18
  -9 -11   1    0.85    0.93
  -9 -11   1    0.87    0.36
  -9  11   1    0.60    0.32
   9 -11  -1   -0.86    0.96
  -9  11   0    4.87    0.87
  -9 -11   0    3.24    1.50
   9 -11   0    3.76    1.34
  -9  11   0    4.39    0.66
  -9  11  -1    0.08    0.19
  -9  11  -1   -0.06    0.18
   9 -11   1    0.71    0.87
  -9 -11  -1    0.41    0.63
  -9  11  -2    4.56    0.89
  -9 -11  -2    4.94    2.03
   9 -11   2    3.42    1.49
  -9  11  -2    2.68    0.57
  -9  11  -3    1.20    0.47
  -9  11  -3    0.52    0.22
   9 -11   3   -0.05    0.81
  -9  11  -4    0.40    0.35
   9 -11   4    0.45    0.91
  -9  11  -5    4.02    0.83
   9 -11   5    0.88    0.58
  -9  11  -6    1.14    0.50
  -9  11  -7    1.91    0.54
  -9  11  -8    1.45    0.55
  -9  11  -9    0.38    0.30
  -9  11  -9   -0.52    0.47
  -9  11 -10    1.69    0.52
  -9  11 -11    1.84    0.53
  -9  11 -12    0.68    0.33
  -9  11 -13    0.15    0.24
  -9  11 -14    0.04    0.17
  -9  11 -15    0.05    0.16
  -9  11 -16    0.33    0.19
  -9 -13  14    0.14    0.23
  -9 -13  13    1.73    0.50
  -9 -13  12    0.09    0.26
  -9 -13  11   -0.53    0.46
  -9 -13  10   -0.18    0.42
  -9 -13   9   -0.47    0.49
  -9  13   8   -0.17    0.24
  -9 -13   8   -0.31    0.47
  -9  13   7    1.66    0.44
  -9  13   7    1.35    0.38
  -9 -13   7    2.38    0.75
  -9  13   6    0.95    0.31
  -9 -13   6    2.19    0.75
  -9  13   5   -0.20    0.30
  -9 -13   5    0.13    0.35
  -9 -13   4    2.45    0.68
  -9  13   4    1.98    0.59
   9  13  -3    1.76    0.47
  -9  13   3    1.03    0.46
  -9 -13   3    1.36    0.48
  -9  13   3    0.84    0.33
  -9  13   2    6.73    1.00
   9  13  -2    7.02    0.92
  -9 -13   2    5.78    0.89
   9  13  -1    0.37    0.30
  -9  13   1    0.20    0.23
  -9  13   0    1.11    0.53
   9  13   0    0.09    0.28
  -9  13  -1    6.23    1.04
  -9  13  -2    9.08    1.25
  -9  13  -3    3.45    0.78
  -9  13  -4    2.10    0.71
  -9  13  -5    2.90    0.74
  -9  13  -6   -0.13    0.26
  -9  13  -7    1.71    0.53
  -9  13  -8    0.88    0.38
  -9  13  -8    0.31    0.27
  -9  13  -9    0.77    0.29
  -9  13  -9    0.32    0.24
  -9  13 -10    1.05    0.37
  -9  13 -11    2.06    0.51
  -9  13 -12    0.22    0.25
  -9  13 -13    0.53    0.25
  -9 -15  10    1.12    0.37
  -9 -15   9    0.77    0.28
  -9 -15   8   -0.34    0.29
  -9 -15   7   -0.07    0.26
  -9  15   6    0.59    0.21
  -9  15   6    0.51    0.20
  -9 -15   6    0.41    0.17
  -9  15   5    2.13    0.47
  -9  15   5    2.04    0.48
  -9 -15   5    2.43    0.49
  -9  15   4    1.43    0.47
  -9  15   3    1.05    0.40
  -9  15   2    1.24    0.43
  -9  15   1    0.33    0.42
   9  15  -1    0.26    0.23
  -9  15   0    1.68    0.49
   9  15   0    1.89    0.43
  -9  15  -1    2.61    0.60
   9  15   1    2.18    0.50
  -9  15  -2    1.03    0.41
   9  15   2    0.94    0.37
  -9  15  -3    1.70    0.50
   9  15   3    1.90    0.45
  -9  15  -4    0.85    0.38
   9  15   4    0.21    0.19
  -9  15  -5    0.03    0.24
   9  15   5   -0.54    0.31
  -9  15  -6    0.49    0.27
  -9  15  -6    0.60    0.37
  -9  15  -7    0.13    0.19
  -9  15  -7   -0.23    0.27
  -9  15  -8    0.10    0.13
  -9  15  -8   -0.13    0.21
  -9  15  -9    1.37    0.32
 -10   0  22    0.04    0.12
 -10   0  21    0.18    0.18
 -10   0  20    1.30    0.49
 -10   0  19    3.16    0.74
 -10   0  18    0.47    0.32
 -10   0  17    0.74    0.42
 -10   0  16   -0.04    0.44
 -10   0  15   -0.26    0.45
 -10   0  14   11.14    1.34
 -10   0  13   -0.21    0.40
 -10   0  12    8.24    1.09
 -10   0  11    5.16    0.86
 -10   0  10    2.40    0.56
 -10   0   9  192.35    4.35
 -10   0   8  106.44    7.81
 -10   0   8   78.83    2.60
 -10   0   7    1.54    0.87
 -10   0   6    8.63    2.00
 -10   0   5   23.28    2.97
 -10   0   4   15.57    2.29
  10   0  -3  121.88    2.65
 -10   0   3  126.40    5.97
 -10   0   2    0.27    0.29
  10   0  -2    0.13    0.16
  10   0  -1   24.08    1.97
 -10   0   1   25.06    2.31
  10   0   0   11.27    1.55
 -10   0   0    9.68    1.36
  10   0   1    9.78    1.63
  10   0   2   24.02    2.75
  10   0   3    9.70    1.92
  10   0   4    5.31    1.55
  10   0   5    0.52    0.78
  10   0   6   27.62    3.83
  10   0   7    0.44    0.70
 -10   0  -8   20.47    1.05
  10   0   8   21.52    3.62
  10   0   9    7.02    2.18
 -10   0  -9    6.88    0.72
 -10   0 -10    2.24    0.46
  10   0  10    1.30    0.99
 -10   0 -11    1.28    0.39
  10   0  11    1.95    1.38
 -10   0 -12    6.16    0.85
  10   0  12    5.60    2.14
 -10   0 -13   12.00    1.24
  10   0  13   11.91    3.15
 -10   0 -14    0.18    0.21
  10   0  14    0.65    0.81
 -10   0 -15    0.71    0.33
 -10   0 -16    2.26    0.75
 -10   0 -16    1.36    0.46
 -10   0 -17    0.25    0.40
 -10   0 -17   -0.30    0.32
 -10   0 -18    5.04    0.83
 -10   0 -18    5.03    0.85
 -10   0 -19    2.86    0.55
 -10   0 -19    2.74    0.57
 -10   0 -20    0.21    0.16
 -10  -2  22    0.46    0.22
 -10  -2  21    1.43    0.45
 -10   2  20    1.15    0.34
 -10  -2  20    1.75    0.58
 -10   2  19    2.29    0.54
 -10  -2  19    1.21    0.49
 -10  -2  18   -0.46    0.44
 -10   2  18    1.01    0.49
 -10   2  17    1.78    0.64
 -10  -2  17    0.82    0.41
 -10   2  16    0.54    0.36
 -10  -2  16    0.35    0.33
 -10   2  15   -0.03    0.32
 -10  -2  15    0.28    0.29
 -10  -2  14    3.77    0.83
 -10   2  14    4.94    0.74
 -10   2  14    4.69    0.83
 -10   2  13   -0.35    0.35
 -10  -2  13   -0.21    0.44
 -10   2  13   -1.18    0.74
 -10   2  12    3.04    0.64
 -10  -2  12    2.21    0.58
 -10   2  11    1.31    0.46
 -10  -2  11    0.48    0.31
 -10  -2  11    0.45    0.16
 -10   2  11    0.65    0.65
 -10   2  10    0.50    0.32
 -10   2  10   -0.21    0.32
 -10  -2  10    0.05    0.16
 -10   2  10    0.35    0.79
 -10  -2  10    0.09    0.20
 -10   2   9    8.80    1.04
 -10  -2   9    6.01    0.70
 -10   2   9    8.82    2.46
 -10   2   9    7.07    0.77
 -10  -2   9    7.82    0.94
 -10  -2   8    1.80    0.41
 -10   2   8    1.79    0.55
 -10   2   8    0.85    1.02
 -10   2   7    2.32    1.34
 -10   2   7    3.23    0.55
 -10   2   6    2.52    1.18
 -10   2   5    2.52    1.24
 -10   2   4    1.39    0.99
 -10   2   3   15.29    2.34
 -10   2   2    4.14    1.21
  10  -2  -2    4.45    0.80
  10  -2  -1    6.40    0.54
  10  -2  -1   10.08    1.40
  10  -2   0   41.02    3.01
  10  -2   1   28.00    2.76
  10  -2   2   20.24    2.52
  10  -2   3    4.56    1.30
  10   2   4   12.29    2.40
  10  -2   4   11.06    2.18
  10   2   5   -0.04    1.07
  10  -2   5    0.24    0.49
  10   2   6    0.69    0.74
  10  -2   6    1.47    1.05
 -10  -2  -7    2.90    0.50
  10   2   7    3.17    1.28
  10  -2   7    2.65    1.54
 -10  -2  -8    5.29    0.57
  10   2   8    7.30    2.25
 -10   2  -8    7.27    0.68
 -10  -2  -8    6.60    0.81
  10  -2   8    6.55    2.14
 -10  -2  -9    7.95    0.77
  10  -2   9    8.71    2.60
  10   2   9    9.77    2.72
 -10   2  -9    9.06    0.80
 -10  -2  -9    7.79    0.91
 -10   2  -9    9.73    0.87
 -10  -2 -10    3.77    0.71
 -10  -2 -10    4.17    0.63
 -10   2 -10    5.23    0.74
  10   2  10    5.68    2.12
 -10   2 -10    5.11    0.57
  10  -2  10    3.81    1.77
 -10  -2 -11    3.89    0.69
 -10   2 -11    4.22    0.67
  10   2  11    4.64    1.92
  10  -2  11    2.63    1.43
 -10  -2 -11    4.40    0.84
 -10  -2 -12    0.67    0.45
 -10  -2 -12   -0.48    0.35
 -10   2 -12    0.47    0.34
  10   2  12   -0.19    0.55
  10  -2  12   -0.77    0.90
 -10   2 -13    8.72    1.07
 -10  -2 -13    8.37    1.05
  10   2  13    9.05    2.65
 -10  -2 -13    9.37    1.29
  10  -2  13    6.77    2.27
 -10  -2 -14    1.84    0.69
 -10  -2 -14    2.00    0.52
 -10   2 -14    1.93    0.55
  10   2  14    1.71    0.97
  10  -2  14    0.95    0.80
 -10  -2 -15    0.56    0.38
 -10  -2 -15    0.45    0.34
 -10   2 -15    0.41    0.32
 -10  -2 -16    0.13    0.26
 -10  -2 -16   -0.28    0.35
 -10   2 -16    0.29    0.26
 -10  -2 -17    0.03    0.19
 -10   2 -17    0.07    0.24
 -10   2 -18    1.99    0.63
 -10   2 -18    1.52    0.45
 -10  -2 -18    1.34    0.38
 -10   2 -19    1.81    0.52
 -10   2 -19    1.23    0.41
 -10  -2 -19    1.06    0.28
 -10   2 -20    0.87    0.32
 -10   2 -20    0.48    0.25
 -10   2 -21    1.57    0.32
 -10  -4  21    1.52    0.49
 -10  -4  20    0.65    0.39
 -10  -4  19    0.27    0.26
 -10  -4  18    0.05    0.34
 -10  -4  17    0.47    0.28
 -10  -4  16    1.25    0.49
 -10   4  16    0.81    0.35
 -10  -4  15    0.18    0.36
 -10   4  15   -0.51    0.58
 -10  -4  14    1.19    0.47
 -10   4  14    0.86    0.31
 -10  -4  14    1.42    0.44
 -10  -4  13   -0.53    0.49
 -10   4  13   -0.78    0.59
 -10  -4  13    0.03    0.24
 -10   4  12    0.38    0.20
 -10   4  12   -0.63    0.54
 -10  -4  12   -0.45    0.40
 -10  -4  12    0.11    0.17
 -10   4  12    0.05    0.52
 -10   4  11    2.78    0.47
 -10  -4  11    3.47    0.75
 -10   4  11    6.53    2.20
 -10   4  11    5.46    0.70
 -10  -4  11    5.15    0.90
 -10   4  10    8.61    0.96
 -10  -4  10    6.92    0.94
 -10   4  10   11.39    2.89
 -10   4  10   10.27    0.90
 -10  -4  10   10.32    1.20
 -10  -4   9    0.84    0.37
 -10   4   9    1.13    0.47
 -10   4   9    0.95    1.01
 -10  -4   9    0.36    0.19
 -10  -4   8    5.71    0.83
 -10   4   8    7.22    0.89
 -10  -4   8    7.36    0.88
 -10   4   8    7.74    2.35
 -10  -4   7    4.12    0.71
 -10   4   7    6.02    2.13
 -10   4   7    5.31    0.69
 -10  -4   7    4.51    0.64
 -10   4   6    8.71    0.78
 -10  -4   6    8.52    0.94
 -10   4   6    8.26    2.32
 -10   4   5   53.26    5.15
 -10  -4   4   28.43    2.29
 -10   4   4   29.53    3.65
 -10  -4   3    7.34    1.19
 -10  -4   2    0.52    0.49
  10  -4  -2    0.78    0.40
  10  -4  -1   35.12    2.28
 -10  -4   1   36.81    3.08
  10  -4  -1   34.03    2.93
  10  -4   0    6.68    1.39
  10  -4   1    8.03    1.67
  10  -4   2    3.47    1.26
  10  -4   3    2.72    1.18
  10  -4   4    5.66    1.74
 -10   4  -5    0.39    0.23
  10  -4   5   -0.18    0.56
 -10  -4  -6    1.63    0.37
 -10   4  -6    1.82    0.41
  10  -4   6    2.35    1.37
 -10   4  -7    0.21    0.15
 -10   4  -7    0.04    0.08
  10  -4   7    0.82    1.06
 -10  -4  -7    0.10    0.16
 -10   4  -8    3.80    0.58
  10   4   8    3.24    1.34
 -10  -4  -8    3.40    0.55
  10  -4   8    2.85    1.47
 -10  -4  -9    4.07    0.63
 -10   4  -9    4.07    0.66
  10   4   9    4.06    1.64
  10  -4   9    3.69    1.78
 -10   4 -10    0.14    0.20
  10   4  10    0.05    0.59
  10  -4  10   -0.05    1.11
 -10  -4 -10   -0.21    0.20
 -10   4 -11    0.32    0.24
  10   4  11    0.55    0.77
  10  -4  11   -1.00    1.06
 -10  -4 -11    0.44    0.26
 -10   4 -12    1.28    0.41
  10  -4  12    2.61    1.82
  10   4  12    0.93    1.13
 -10  -4 -12    1.15    0.38
 -10   4 -13    3.64    0.75
  10   4  13    4.91    1.91
 -10  -4 -13    4.11    0.69
  10  -4  13    3.08    1.65
 -10   4 -14    0.50    0.34
 -10  -4 -14    0.40    0.26
 -10   4 -15    0.29    0.34
 -10  -4 -15    0.11    0.17
 -10   4 -16    2.92    0.67
 -10  -4 -16    2.27    0.49
 -10   4 -17    0.12    0.23
 -10   4 -18    0.34    0.24
 -10   4 -19    2.56    0.61
 -10   4 -19    2.06    0.46
 -10   4 -20    3.00    0.54
 -10   4 -20    2.81    0.47
 -10  -6  21    2.62    0.49
 -10  -6  20    0.74    0.33
 -10  -6  19    1.25    0.56
 -10  -6  18   -0.14    0.36
 -10  -6  17    0.09    0.38
 -10  -6  16    1.39    0.48
 -10   6  16    1.03    0.32
 -10  -6  15   -0.29    0.44
 -10   6  15   -0.44    0.52
 -10  -6  15    0.28    0.24
 -10  -6  14    4.37    0.86
 -10   6  14    4.64    0.78
 -10  -6  13   -0.36    0.42
 -10   6  13   -0.59    0.49
 -10  -6  13    0.03    0.25
 -10   6  12    2.72    1.49
 -10  -6  12    1.90    0.54
 -10   6  12    0.68    0.31
 -10  -6  12    2.29    0.72
 -10   6  11    1.34    0.37
 -10  -6  11    2.86    0.79
 -10   6  11    4.96    1.92
 -10  -6  11    3.81    0.83
 -10  -6  10   14.48    1.62
 -10   6  10   25.49    4.35
 -10   6  10   17.45    1.39
 -10  -6  10   22.83    1.80
 -10   6   9    0.51    0.77
 -10  -6   9    1.12    0.43
 -10   6   9    0.78    0.36
 -10  -6   9    0.04    0.40
 -10  -6   8    0.93    0.34
 -10   6   8    1.16    0.42
 -10  -6   8    0.67    0.29
 -10   6   8    1.33    1.21
 -10  -6   7    4.80    0.89
 -10   6   7    5.45    0.68
 -10   6   7    7.06    2.14
 -10  -6   7    5.61    0.70
 -10   6   6    0.76    0.22
 -10   6   6    1.15    0.95
 -10  -6   6    0.93    0.28
 -10  -6   6    0.87    0.41
 -10   6   6    1.30    0.30
 -10  -6   5   17.43    2.43
 -10  -6   5   18.97    1.62
 -10   6   5   20.98    3.48
 -10  -6   4   16.24    2.37
 -10  -6   4   15.80    1.39
 -10  -6   3    4.64    0.71
 -10  -6   3    4.29    1.24
 -10  -6   2    0.59    0.27
  10  -6  -2   -0.12    0.38
 -10  -6   2    0.31    0.45
  10  -6  -1    8.69    1.57
 -10  -6   1    8.85    0.86
 -10  -6   1    7.91    1.90
  10  -6   0   12.98    2.02
 -10  -6   0   15.88    2.70
  10  -6   1   13.82    2.15
 -10  -6  -1   17.25    2.90
  10  -6   1   12.80    2.42
 -10   6  -2    7.28    0.76
  10  -6   2    8.19    2.04
  10  -6   3    6.18    1.85
 -10  -6  -3    6.70    0.67
 -10   6  -3    7.13    0.74
 -10   6  -4   28.04    1.50
 -10   6  -4   24.78    1.27
  10  -6   4   25.70    3.81
 -10  -6  -4   22.70    1.24
 -10   6  -5    8.51    0.79
 -10   6  -5    7.44    0.84
  10  -6   5    8.70    2.27
 -10  -6  -5    9.45    0.80
  10  -6   6   19.13    3.56
 -10   6  -6   17.72    1.24
 -10   6  -6   20.18    1.37
 -10  -6  -6   18.26    1.12
 -10   6  -7    4.95    0.71
 -10   6  -7    4.97    0.82
  10  -6   7    5.73    2.05
 -10  -6  -7    6.04    0.66
 -10   6  -7    6.00    0.66
  10  -6   8    1.24    1.08
 -10   6  -8    1.71    0.35
 -10   6  -8    0.77    0.28
 -10  -6  -8    1.31    0.32
  10  -6   9    4.32    1.85
 -10   6  -9    4.81    0.77
 -10  -6  -9    4.79    0.60
  10  -6  10    0.55    1.08
  10   6  10   -0.57    1.10
 -10   6 -10    0.40    0.35
 -10  -6 -10    0.18    0.16
  10  -6  11    0.48    0.71
 -10   6 -11    0.63    0.33
  10   6  11    0.48    0.47
 -10  -6 -11    0.62    0.24
  10  -6  12   -0.46    0.60
 -10   6 -12    0.63    0.38
  10   6  12    0.34    0.82
 -10   6 -13    0.73    0.40
 -10   6 -14   12.24    1.35
 -10   6 -15    8.55    1.09
 -10   6 -16    1.41    0.49
 -10   6 -17    0.30    0.25
 -10   6 -18    1.30    0.39
 -10   6 -19    1.71    0.48
 -10   6 -19    0.54    0.23
 -10   6 -20    2.41    0.37
 -10   6 -20    3.32    0.51
 -10  -8  19   -0.01    0.17
 -10  -8  18    0.22    0.23
 -10  -8  17    1.49    0.54
 -10  -8  17    1.04    0.34
 -10  -8  16    0.90    0.56
 -10  -8  16    0.33    0.21
 -10  -8  15    0.12    0.32
 -10   8  15   -0.18    0.28
 -10  -8  15    0.09    0.31
 -10   8  14   -0.96    0.43
 -10  -8  14   -0.51    0.38
 -10  -8  14   -0.51    0.48
 -10  -8  13    0.18    0.24
 -10   8  13   -0.52    0.42
 -10  -8  12    0.45    0.27
 -10   8  12   -0.37    0.31
 -10  -8  12    0.83    0.49
 -10  -8  11    1.19    0.47
 -10   8  11    0.34    0.22
 -10  -8  11    0.79    0.53
 -10   8  11    0.74    0.69
 -10   8  10    3.48    0.56
 -10  -8  10    2.26    0.77
 -10  -8  10    3.74    0.73
 -10  -8   9    2.43    0.51
 -10  -8   9    1.53    0.50
 -10   8   9    2.48    1.10
 -10   8   8   -0.09    0.56
 -10  -8   8    0.21    0.37
 -10  -8   7    0.00    0.26
 -10   8   7    0.32    0.56
 -10   8   6    2.68    1.41
 -10  -8   6    2.77    0.77
 -10   8   5    2.50    1.38
 -10  -8   5    2.29    0.67
 -10  -8   4   12.80    2.38
 -10  -8   4   14.55    1.52
 -10  -8   3    9.83    1.20
 -10  -8   3   10.52    2.34
 -10  -8   2    3.53    1.37
 -10   8   2    3.08    0.44
 -10  -8   2    4.08    0.74
  10  -8  -2    3.10    1.18
 -10  -8   1    0.16    0.74
 -10   8   1   -0.03    0.16
 -10  -8   1   -0.02    0.17
  10  -8  -1   -0.07    0.37
 -10  -8   0    1.15    0.96
 -10   8   0    0.81    0.24
 -10  -8   0    0.95    0.35
  10  -8   0    0.20    0.63
 -10  -8  -1    7.18    2.12
 -10   8  -1    7.26    0.73
 -10  -8  -1    6.47    0.73
  10  -8   1    6.42    1.74
 -10   8  -2    3.98    0.58
 -10  -8  -2    4.39    1.78
  10  -8   2    3.51    1.34
 -10   8  -2    3.02    0.54
  10  -8   3    8.36    2.15
 -10   8  -3   10.30    0.97
 -10   8  -3    9.19    0.98
 -10   8  -4    5.16    0.78
 -10   8  -4    5.67    0.77
 -10   8  -5    0.58    0.32
 -10   8  -5    0.30    0.23
 -10   8  -6    3.16    0.65
 -10   8  -6    3.15    0.61
 -10   8  -7   16.25    1.46
 -10   8  -7   18.12    1.47
  10  -8   7   15.26    3.63
 -10   8  -8   22.29    1.74
  10  -8   8   18.83    4.15
 -10   8  -8   24.31    1.55
 -10   8  -9    4.39    0.76
  10  -8   9    5.04    1.99
 -10   8  -9    5.51    0.69
  10  -8  10   -0.29    0.45
 -10   8 -10    0.42    0.26
 -10   8 -11    0.05    0.23
 -10   8 -12    0.35    0.24
 -10   8 -13    0.16    0.26
 -10   8 -14    0.36    0.31
 -10   8 -15    0.97    0.40
 -10   8 -16    0.43    0.28
 -10   8 -17    0.31    0.21
 -10   8 -18    0.06    0.18
 -10   8 -18    0.08    0.13
 -10 -10  17    0.58    0.24
 -10 -10  16   -0.03    0.18
 -10 -10  15   -0.17    0.31
 -10 -10  14    4.18    0.91
 -10 -10  13   -0.06    0.30
 -10 -10  12    1.26    0.56
 -10 -10  11    1.63    0.71
 -10 -10  10    0.46    0.34
 -10 -10   9    4.91    1.07
 -10 -10   8   -0.07    0.45
 -10  10   7    2.81    1.49
 -10 -10   7    1.87    0.71
 -10  10   6    9.51    2.59
 -10 -10   6    8.45    1.40
 -10  10   5    0.38    0.95
 -10 -10   5    0.70    0.42
 -10  10   4    5.40    2.12
 -10 -10   4    5.90    1.05
 -10  10   3   14.31    1.25
 -10 -10   3   12.57    2.59
 -10 -10   3   17.38    1.73
 -10 -10   2    2.53    0.65
 -10  10   2    1.68    0.43
 -10  10   1    3.62    0.65
 -10 -10   1    3.38    0.71
 -10 -10   1    2.82    1.34
 -10 -10   0   -0.14    0.25
 -10  10   0    0.10    0.21
 -10  10   0   -0.21    0.29
 -10 -10   0   -0.04    0.69
  10 -10   0    0.86    0.84
 -10 -10  -1   -0.45    0.61
 -10  10  -1    0.40    0.31
 -10  10  -1    0.25    0.26
  10 -10   1    0.19    0.63
 -10  10  -2    9.03    1.09
 -10  10  -2    8.14    0.91
 -10  10  -3    3.34    0.68
 -10  10  -3    2.83    0.55
  10 -10   3    1.59    0.96
  10 -10   4    0.76    0.78
 -10  10  -4    1.41    0.44
 -10  10  -4    1.48    0.45
 -10  10  -5    1.10    0.44
  10 -10   5    0.20    0.73
 -10  10  -5    1.02    0.35
 -10  10  -6    0.12    0.23
  10 -10   6   -0.34    0.56
 -10  10  -6    0.19    0.25
 -10  10  -7    0.28    0.33
  10 -10   7    0.07    0.78
 -10  10  -8    2.97    0.69
 -10  10  -9    2.97    0.57
 -10  10  -9    3.18    0.71
 -10  10 -10   -0.05    0.21
 -10  10 -11    1.41    0.48
 -10  10 -12   -0.14    0.24
 -10  10 -13    1.93    0.52
 -10  10 -14    0.03    0.24
 -10  10 -15    0.06    0.15
 -10  10 -16    0.91    0.29
 -10  10 -17   -0.08    0.09
 -10 -12  15    0.57    0.30
 -10 -12  14   -0.10    0.24
 -10 -12  13    0.38    0.29
 -10 -12  12    0.92    0.46
 -10 -12  11   -0.59    0.49
 -10 -12  10   -0.33    0.46
 -10 -12   9    2.96    0.85
 -10 -12   8    0.34    0.27
 -10 -12   7    1.86    0.71
 -10  12   7    1.70    0.47
 -10  12   6    2.38    0.54
 -10 -12   6    2.88    0.85
 -10 -12   5    1.67    0.65
 -10  12   5    1.43    0.43
 -10  12   4    1.62    0.51
 -10 -12   4    2.91    0.78
 -10  12   3    0.14    0.23
 -10 -12   3    0.31    0.29
 -10  12   2    7.62    1.09
 -10 -12   2    8.00    1.09
 -10  12   2    6.29    0.95
 -10  12   1    4.74    0.88
  10  12  -1    3.99    0.65
 -10  12   1    4.27    0.71
 -10 -12   1    4.29    0.76
 -10  12   0    3.73    0.77
  10  12   0    3.09    0.62
 -10  12   0    3.60    0.63
 -10  12  -1    1.67    0.56
 -10  12  -1    1.14    0.36
 -10  12  -2   17.97    1.67
 -10  12  -2   15.98    1.23
 -10  12  -3    0.82    0.46
 -10  12  -4    0.94    0.46
 -10  12  -5    0.86    0.43
 -10  12  -6    0.35    0.28
 -10  12  -7    0.99    0.45
 -10  12  -8    1.23    0.41
 -10  12  -8    2.38    0.51
 -10  12  -9    0.30    0.19
 -10  12  -9   -0.16    0.26
 -10  12 -10   -0.04    0.23
 -10  12 -11    2.78    0.60
 -10  12 -12    0.21    0.26
 -10  12 -13    1.73    0.40
 -10  12 -14    0.81    0.25
 -10 -14  12    0.68    0.33
 -10 -14  11    1.82    0.51
 -10 -14  10    1.29    0.41
 -10 -14   9    1.04    0.40
 -10 -14   8    0.16    0.19
 -10 -14   7    0.89    0.44
 -10 -14   6    0.17    0.28
 -10  14   6   -0.07    0.16
 -10  14   6    0.52    0.29
 -10  14   5    1.82    0.45
 -10 -14   5    1.99    0.55
 -10  14   5    0.84    0.28
 -10  14   5    1.47    0.49
 -10  14   4    2.80    0.59
 -10 -14   4    2.18    0.52
 -10  14   3    0.10    0.31
 -10 -14   3    0.45    0.28
 -10  14   2    0.21    0.27
 -10  14   1    0.81    0.39
 -10  14   0    1.13    0.46
  10  14   0    0.81    0.33
 -10  14  -1    3.26    0.74
  10  14   1    3.21    0.59
 -10  14  -2    1.98    0.59
  10  14   2    1.14    0.36
  10  14   3    2.15    0.52
 -10  14  -3    2.69    0.63
 -10  14  -4    1.69    0.51
 -10  14  -5    0.36    0.31
 -10  14  -6    0.09    0.20
 -10  14  -6    0.20    0.30
 -10  14  -7    1.23    0.37
 -10  14  -7    0.66    0.30
 -10  14  -8    1.88    0.45
 -10  14  -8    1.90    0.39
 -10  14  -9    0.63    0.29
 -10  14 -10    0.33    0.18
 -10  14 -11    0.48    0.19
 -10  16   4    0.61    0.24
 -10  16   3    0.43    0.25
 -10  16   2    1.00    0.30
 -10  16   2    0.79    0.30
 -10  16   1    1.73    0.45
 -10  16   1    1.32    0.29
 -10  16   0    0.84    0.39
 -10  16   0    0.46    0.22
 -10  16  -1    2.03    0.53
 -10  16  -1    1.85    0.39
 -10  16  -2    0.19    0.15
 -10  16  -2    0.31    0.26
 -10  16  -3   -0.23    0.19
 -10  16  -3    0.63    0.32
 -10  16  -4    1.15    0.37
 -10  16  -4    1.20    0.28
 -10  16  -5    0.62    0.26
 -11  -1  22    0.89    0.25
 -11   1  21    0.49    0.20
 -11  -1  21    0.54    0.25
 -11   1  20    0.56    0.25
 -11  -1  20    0.95    0.43
 -11   1  19    2.84    0.64
 -11  -1  19    4.01    0.87
 -11   1  18    0.49    0.41
 -11  -1  18    0.24    0.48
 -11  -1  17    3.53    0.77
 -11   1  17    4.47    0.93
 -11   1  16   -0.02    0.29
 -11  -1  16   -0.36    0.55
 -11   1  15   -0.59    0.52
 -11  -1  15   -0.22    0.51
 -11   1  14    3.01    0.67
 -11  -1  14    2.74    0.62
 -11   1  13   10.82    1.30
 -11  -1  13    9.86    1.29
 -11   1  12    9.44    1.19
 -11  -1  12    9.24    1.22
 -11   1  11   18.67    1.61
 -11  -1  11   18.35    1.66
 -11   1  10    4.00    1.87
 -11   1  10    4.58    0.79
 -11  -1  10    4.36    0.79
 -11   1   9   26.91    4.24
 -11   1   9   22.16    1.58
 -11  -1   9   24.52    1.73
 -11   1   8  106.65    3.22
 -11  -1   8  109.73    3.37
 -11  -1   7    2.36    0.47
 -11   1   7    2.47    1.26
 -11   1   6   25.16    3.61
 -11  -1   6   23.69    3.24
 -11   1   5    0.78    0.72
 -11  -1   5   -0.11    0.61
 -11   1   4   22.04    2.96
 -11  -1   4   21.62    2.64
  11   1  -3   37.61    1.70
 -11   1   3   37.87    3.66
 -11  -1   3   35.61    3.14
  11   1  -2   32.77    2.19
 -11   1   2   30.70    3.07
  11  -1  -2   33.27    2.11
 -11  -1   2   25.95    2.54
  11   1  -1   24.03    2.25
  11  -1  -1   24.65    2.13
 -11  -1   1   20.90    1.94
 -11   1   1   23.70    2.51
  11   1   0   18.18    2.26
  11  -1   0   18.87    2.08
 -11  -1   0   16.37    1.57
  11   1   1    4.40    1.20
  11  -1   1    4.05    1.06
 -11  -1  -1    3.56    0.63
  11   1   2   36.87    3.79
  11  -1   2   39.84    3.53
  11  -1   3   76.18    5.28
  11   1   3   72.85    5.70
  11   1   4   11.45    2.42
  11  -1   4   10.96    2.16
  11   1   5   18.05    3.17
  11  -1   5   16.94    2.84
 -11  -1  -6    1.16    0.30
  11   1   6    2.06    1.38
  11  -1   6    2.31    1.25
 -11  -1  -7   -0.05    0.27
  11   1   7   -0.13    0.66
  11  -1   7    0.98    1.32
 -11   1  -7    0.38    0.21
 -11  -1  -8   -0.17    0.26
 -11  -1  -8    0.10    0.10
 -11   1  -8    0.39    0.21
  11   1   8    0.65    1.21
  11  -1   8    0.26    0.79
 -11   1  -8    0.17    0.13
 -11  -1  -9    1.59    0.44
 -11   1  -9    2.27    0.46
 -11  -1  -9    2.11    0.38
  11   1   9    3.15    1.50
  11  -1   9    2.64    1.36
 -11   1  -9    1.64    0.33
  11  -1  10    9.39    2.67
 -11   1 -10    9.11    0.92
  11   1  10    9.50    2.65
 -11  -1 -10    8.39    0.87
 -11  -1 -10    7.69    1.02
 -11  -1 -11    5.96    0.81
 -11   1 -11    6.24    0.84
  11   1  11    5.68    2.01
 -11  -1 -11    6.41    1.02
  11  -1  11    5.30    2.19
 -11  -1 -12    2.10    0.74
 -11  -1 -12    1.92    0.44
 -11   1 -12    2.12    0.52
  11   1  12    1.63    1.09
  11  -1  12    1.05    0.89
 -11  -1 -13    2.67    0.78
 -11  -1 -13    0.96    0.39
 -11   1 -13    1.52    0.45
  11   1  13    2.69    1.48
  11  -1  13    0.96    1.04
 -11  -1 -14    0.85    0.54
 -11  -1 -14    0.25    0.22
 -11   1 -14    0.26    0.25
  11   1  14   -0.08    0.49
  11  -1  14    0.16    0.66
 -11  -1 -15    1.59    0.66
 -11  -1 -15    1.30    0.40
 -11   1 -15    0.78    0.40
 -11  -1 -16    4.90    0.84
 -11  -1 -16    4.79    0.97
 -11   1 -16    4.88    1.10
 -11   1 -16    4.52    0.80
 -11  -1 -17    1.97    0.56
 -11   1 -17    2.62    0.72
 -11  -1 -17    1.92    0.53
 -11   1 -17    2.08    0.53
 -11   1 -18    0.26    0.34
 -11   1 -18    0.07    0.19
 -11  -1 -18    0.13    0.18
 -11  -1 -19    3.55    0.55
 -11   1 -19    3.78    0.62
 -11   1 -19    3.96    0.67
 -11  -1 -20    0.06    0.11
 -11   1 -20    0.37    0.20
 -11  -3  21    1.28    0.44
 -11  -3  20    0.55    0.48
 -11  -3  19    1.39    0.62
 -11  -3  18    0.15    0.35
 -11   3  17    0.45    0.31
 -11  -3  17   -0.86    0.62
 -11   3  16    0.01    0.22
 -11  -3  16   -0.24    0.58
 -11   3  15    0.80    0.33
 -11  -3  15    0.48    0.27
 -11   3  14    0.86    0.34
 -11  -3  14    0.82    0.28
 -11   3  13   -0.09    0.30
 -11  -3  13    0.06    0.39
 -11   3  12   -0.15    0.30
 -11  -3  12    0.12    0.25
 -11   3  12   -1.15    0.75
 -11  -3  12    0.29    0.15
 -11   3  12   -0.16    1.16
 -11   3  11   -0.10    0.20
 -11  -3  11    0.53    0.45
 -11   3  11   -0.04    0.75
 -11  -3  11    0.06    0.19
 -11   3  10    3.53    0.58
 -11   3  10    4.95    1.86
 -11  -3  10    1.98    0.47
 -11   3  10    3.91    0.72
 -11  -3  10    3.85    0.78
 -11   3   9   -0.01    0.12
 -11  -3   9    0.56    0.35
 -11  -3   9    0.00    0.22
 -11   3   9   -0.28    0.68
 -11   3   8    1.63    0.35
 -11  -3   8    2.08    0.51
 -11   3   8    1.58    1.01
 -11  -3   8    1.24    0.44
 -11  -3   7    1.31    0.39
 -11  -3   7    1.34    0.43
 -11   3   7    1.51    0.91
 -11  -3   6   -0.04    0.16
 -11   3   6    0.07    0.66
 -11   3   5    1.20    0.95
 -11   3   4   30.47    3.67
 -11   3   3    2.57    1.06
  11  -3  -2    4.11    0.92
  11  -3  -1    0.42    0.28
  11  -3   0    0.80    0.52
  11  -3   1    8.20    1.71
  11  -3   2   18.60    2.67
  11  -3   3    1.02    0.70
  11  -3   4   78.97    6.14
  11   3   5    4.51    1.73
 -11   3  -5    4.00    0.57
 -11  -3  -5    4.15    0.56
  11  -3   5    4.43    1.47
  11   3   6    4.99    1.72
 -11   3  -6    3.70    0.63
 -11  -3  -6    5.41    0.67
  11  -3   6    4.40    1.79
 -11  -3  -7    8.09    0.68
 -11   3  -7    9.06    0.74
  11   3   7    9.27    2.47
 -11  -3  -7    9.32    0.95
  11  -3   7    7.75    2.30
 -11  -3  -8    5.77    0.65
 -11   3  -8    6.96    0.73
  11   3   8    6.96    2.33
 -11  -3  -8    6.80    0.84
  11  -3   8    4.15    1.83
 -11   3  -9    8.99    0.91
  11   3   9    9.64    2.84
 -11  -3  -9    7.39    0.94
 -11  -3  -9    6.94    0.78
  11  -3   9    7.83    2.49
 -11  -3 -10   -0.18    0.28
 -11  -3 -10    0.05    0.27
 -11   3 -10    0.43    0.26
  11   3  10    0.18    0.91
 -11   3 -10   -0.17    0.21
  11  -3  10   -0.43    1.08
 -11  -3 -11    1.15    0.43
 -11  -3 -11    0.57    0.24
 -11   3 -11    1.58    0.45
  11   3  11    1.29    1.33
 -11   3 -11    0.88    0.28
  11  -3  11    1.21    0.88
 -11  -3 -12    0.42    0.27
 -11  -3 -12    0.07    0.15
 -11   3 -12    0.50    0.34
  11   3  12    1.50    1.15
  11  -3  12   -0.70    0.73
 -11  -3 -13    1.47    0.51
 -11   3 -13    0.93    0.43
 -11  -3 -13    0.62    0.28
  11   3  13    0.75    0.84
  11  -3  13    0.55    0.82
 -11   3 -14    6.45    0.99
 -11  -3 -14    7.26    1.01
 -11   3 -15    0.86    0.36
 -11  -3 -15    0.09    0.19
 -11   3 -16   -0.09    0.25
 -11  -3 -16    0.34    0.28
 -11   3 -17    0.13    0.21
 -11  -3 -17    0.31    0.21
 -11   3 -18    0.48    0.42
 -11   3 -18   -0.12    0.21
 -11  -3 -18   -0.06    0.16
 -11   3 -19    0.09    0.18
 -11   3 -19   -0.41    0.23
 -11   3 -20    2.53    0.49
 -11   3 -20    2.03    0.41
 -11  -5  21    1.02    0.34
 -11  -5  20    0.96    0.42
 -11  -5  19    3.42    0.81
 -11  -5  18    1.20    0.54
 -11  -5  17    0.46    0.41
 -11  -5  16   -0.38    0.54
 -11  -5  15    1.24    0.49
 -11  -5  15    2.34    0.55
 -11  -5  14    1.73    0.45
 -11   5  14    1.46    0.37
 -11  -5  13    2.02    0.55
 -11   5  13    0.95    0.32
 -11  -5  13    3.42    0.73
 -11   5  13    3.86    1.78
 -11  -5  12    0.37    0.29
 -11   5  12   -0.50    0.63
 -11  -5  12    0.13    0.27
 -11   5  11    0.72    1.06
 -11  -5  11    1.70    0.60
 -11   5  11   -0.79    0.54
 -11  -5  11    1.11    0.47
 -11   5  10   15.30    1.38
 -11  -5  10   11.49    1.38
 -11   5  10   21.44    4.14
 -11  -5  10   18.87    1.67
 -11  -5   9    3.27    0.72
 -11  -5   9    4.74    0.82
 -11   5   9    4.37    1.85
 -11   5   9    3.33    0.69
 -11   5   8    5.57    0.83
 -11  -5   8    4.84    0.88
 -11   5   8    4.04    1.81
 -11  -5   8    6.38    0.87
 -11  -5   7    2.82    0.55
 -11   5   7    4.58    1.83
 -11  -5   7    3.09    0.70
 -11   5   7    3.70    0.61
 -11  -5   6    7.32    1.03
 -11   5   6    5.83    0.60
 -11  -5   6    6.21    0.72
 -11   5   6    8.68    2.39
 -11   5   5    1.20    0.30
 -11  -5   5    1.23    0.28
 -11  -5   5    1.34    0.46
 -11   5   5    1.73    0.95
 -11   5   4   23.42    3.51
 -11  -5   4   23.27    1.66
 -11   5   4   21.55    1.21
 -11   5   3    1.26    0.34
 -11  -5   3    1.14    0.34
 -11  -5   2    5.66    0.73
 -11  -5   2    5.98    0.76
 -11  -5   2    5.02    1.21
 -11  -5   1   33.34    3.30
 -11  -5   1   33.43    1.69
  11  -5   0    0.34    0.47
 -11  -5   0    1.19    0.36
  11  -5   0    0.80    0.53
  11  -5   1   29.24    3.43
 -11  -5  -1   28.77    1.50
 -11   5  -2    5.72    0.64
  11  -5   2    5.83    1.63
 -11  -5  -2    4.47    0.58
 -11  -5  -2    4.98    0.58
  11  -5   3    0.10    0.44
 -11   5  -3    0.70    0.29
 -11   5  -3    0.18    0.12
 -11  -5  -3    0.11    0.16
 -11  -5  -3    0.33    0.21
  11  -5   4    7.20    1.99
 -11   5  -4    8.90    0.84
 -11   5  -4    8.16    0.83
 -11  -5  -4    6.93    0.69
 -11  -5  -4    7.76    0.74
 -11   5  -5    8.88    0.73
 -11   5  -5   11.34    1.00
 -11  -5  -5   10.38    0.81
 -11  -5  -5   11.82    0.94
  11  -5   5   12.21    2.73
 -11   5  -5   11.55    0.93
 -11   5  -6    0.71    0.26
 -11   5  -6    0.50    0.16
 -11   5  -6    0.49    0.28
 -11  -5  -6    0.94    0.31
 -11  -5  -6    0.32    0.14
  11  -5   6    0.71    0.68
 -11   5  -7   12.68    1.23
  11  -5   7   13.28    3.21
 -11   5  -7   11.71    0.90
 -11  -5  -7   13.15    1.10
 -11   5  -7   13.48    1.06
  11   5   8    1.24    0.68
 -11   5  -8    1.23    0.38
 -11   5  -8    1.37    0.28
 -11  -5  -8    1.55    0.39
  11  -5   8    1.45    1.23
 -11   5  -9    4.64    0.70
  11   5   9    3.53    1.38
 -11  -5  -9    4.37    0.66
  11  -5   9    4.53    2.08
 -11   5 -10    3.18    0.66
  11   5  10    4.01    1.92
 -11  -5 -10    2.95    0.56
  11  -5  10    3.15    1.81
  11  -5  11    0.47    0.92
 -11   5 -11   -0.06    0.20
  11   5  11   -0.13    0.59
 -11  -5 -11   -0.13    0.27
  11  -5  12    3.72    1.99
  11   5  12    4.04    1.86
 -11  -5 -12    3.79    0.62
 -11   5 -12    3.42    0.74
 -11   5 -13    0.34    0.29
 -11  -5 -13   -0.16    0.22
 -11   5 -14    0.43    0.33
 -11  -5 -14    0.54    0.27
 -11   5 -15   11.39    1.23
 -11   5 -16    1.31    0.46
 -11   5 -17    0.33    0.23
 -11   5 -18    0.96    0.45
 -11   5 -18    0.50    0.26
 -11   5 -19    0.18    0.23
 -11   5 -19    0.23    0.20
 -11   5 -20    3.31    0.44
 -11   5 -20    3.73    0.54
 -11  -7  20    4.00    0.59
 -11  -7  19    0.74    0.36
 -11  -7  18    0.59    0.42
 -11  -7  17    0.72    0.44
 -11  -7  16    0.33    0.55
 -11  -7  16    0.29    0.31
 -11  -7  15    5.95    0.93
 -11  -7  15    5.12    0.97
 -11  -7  14   -0.72    0.62
 -11  -7  14    0.30    0.31
 -11  -7  13    0.00    0.33
 -11  -7  13    0.50    0.41
 -11  -7  12    0.66    0.42
 -11  -7  12    0.95    0.50
 -11  -7  11    1.95    0.57
 -11   7  11    0.17    0.21
 -11  -7  11    1.37    0.56
 -11   7  11    1.67    1.31
 -11  -7  10    8.05    1.10
 -11   7  10    7.04    0.90
 -11   7  10    9.69    2.76
 -11  -7  10    4.77    1.01
 -11   7   9    2.82    0.58
 -11  -7   9    2.38    0.55
 -11  -7   9    1.71    0.56
 -11   7   9    2.62    1.28
 -11  -7   8    0.30    0.18
 -11   7   8    0.47    0.31
 -11  -7   8    0.07    0.27
 -11   7   8    0.69    0.88
 -11   7   7    4.60    0.60
 -11  -7   7    5.27    1.01
 -11   7   7    4.58    1.84
 -11  -7   7    4.81    0.64
 -11  -7   6    0.58    0.22
 -11  -7   6    1.23    0.53
 -11   7   6    0.67    0.28
 -11   7   6    1.03    1.15
 -11  -7   5   11.90    1.39
 -11   7   5   10.11    2.61
 -11   7   4   14.91    2.97
 -11  -7   4   13.95    1.48
 -11  -7   3    3.12    1.21
 -11  -7   3    3.89    0.77
 -11  -7   2    3.69    1.30
 -11  -7   2    5.65    0.86
 -11  -7   1    3.73    0.66
 -11  -7   1    3.43    1.27
 -11  -7   0   -0.10    0.57
 -11  -7   0    0.22    0.18
  11  -7   0    0.32    0.45
 -11  -7  -1    4.77    0.65
 -11   7  -1    4.59    0.66
  11  -7   1    3.56    1.16
 -11   7  -2   15.13    0.97
 -11  -7  -2   15.83    1.09
 -11   7  -2   16.77    1.24
  11  -7   2   16.38    2.58
 -11   7  -3   13.68    0.98
 -11   7  -3   13.42    1.21
  11  -7   3   12.83    2.84
 -11   7  -4    5.11    0.79
 -11   7  -4    5.65    0.68
  11  -7   4    3.91    1.66
 -11   7  -5    1.44    0.39
 -11   7  -5    1.10    0.41
  11  -7   5    1.46    1.28
  11  -7   6    3.07    1.74
 -11   7  -6    4.22    0.68
 -11  -7  -6    4.86    0.68
 -11   7  -6    4.61    0.72
 -11   7  -6    4.62    0.77
  11  -7   7    2.44    1.41
 -11   7  -7    3.53    0.62
 -11  -7  -7    5.09    0.66
 -11   7  -7    4.60    0.70
 -11   7  -7    4.42    0.84
 -11   7  -8    0.44    0.34
  11  -7   8   -0.40    0.75
 -11   7  -8   -0.14    0.34
 -11  -7  -8    0.35    0.23
  11  -7   9    0.78    0.77
 -11   7  -9    0.31    0.22
 -11   7  -9    0.11    0.18
 -11  -7  -9    0.62    0.27
  11  -7  10   -0.29    0.49
 -11   7 -10    0.12    0.20
  11   7  10   -0.93    1.47
 -11   7 -11    1.03    0.47
 -11   7 -12    3.48    0.69
 -11   7 -13   -0.02    0.18
 -11   7 -14    0.56    0.37
 -11   7 -15    7.87    1.07
 -11   7 -16    1.45    0.45
 -11   7 -17    0.45    0.32
 -11   7 -17    0.14    0.18
 -11   7 -18    0.03    0.17
 -11   7 -18    0.33    0.20
 -11   7 -19    0.35    0.19
 -11   7 -19    0.24    0.10
 -11  -9  17    0.27    0.14
 -11  -9  17    0.54    0.22
 -11  -9  16    0.81    0.39
 -11  -9  16    0.36    0.26
 -11  -9  15    0.25    0.28
 -11  -9  15   -0.29    0.32
 -11  -9  14    1.44    0.48
 -11  -9  14    2.84    0.76
 -11  -9  13    2.22    0.52
 -11  -9  13    2.73    0.80
 -11  -9  12    0.50    0.21
 -11  -9  12    0.47    0.32
 -11  -9  11    2.95    0.90
 -11  -9  10   -0.06    0.56
 -11  -9   9   -0.08    0.39
 -11   9   9    0.33    0.52
 -11   9   8    1.15    0.96
 -11  -9   8    0.38    0.32
 -11   9   7    0.02    0.24
 -11   9   7    0.09    0.58
 -11  -9   7    0.43    0.44
 -11   9   6    3.61    1.69
 -11  -9   6    4.06    0.97
 -11   9   5    2.55    1.46
 -11  -9   5    2.52    0.75
 -11   9   4    5.57    1.98
 -11  -9   4    4.75    0.96
 -11  -9   3    3.49    0.77
 -11  -9   2    1.83    0.80
 -11  -9   2    1.31    0.51
 -11   9   1    3.71    0.59
 -11  -9   1    3.30    0.71
 -11  -9   1    4.07    1.47
 -11  -9   0    2.68    1.11
 -11   9   0    3.36    0.56
 -11  -9   0    3.55    0.66
 -11  -9  -1    0.65    1.07
 -11   9  -1    1.47    0.45
 -11  -9  -1    0.82    0.30
 -11   9  -1    0.86    0.25
 -11   9  -2    0.25    0.26
 -11   9  -2    0.03    0.20
  11  -9   2    0.37    0.43
 -11   9  -3    8.10    0.95
 -11   9  -3    6.42    0.94
  11  -9   3    7.52    1.93
 -11   9  -4    4.80    0.78
  11  -9   4    3.80    1.49
 -11   9  -4    4.39    0.72
 -11   9  -5    0.21    0.24
  11  -9   5    0.77    0.52
 -11   9  -5    0.23    0.27
 -11   9  -6    3.32    0.71
 -11   9  -6    3.44    0.69
 -11   9  -7    9.56    1.11
 -11   9  -7    8.72    1.11
 -11   9  -8   12.33    1.35
 -11   9  -8   14.62    1.28
 -11   9  -9    1.16    0.38
 -11   9  -9    0.44    0.21
 -11   9 -10    3.38    0.73
 -11   9 -11    1.30    0.48
 -11   9 -12    0.50    0.33
 -11   9 -13    1.47    0.45
 -11   9 -14    0.22    0.24
 -11   9 -14    0.07    0.19
 -11   9 -15    1.02    0.38
 -11   9 -15    0.32    0.24
 -11   9 -16    1.72    0.43
 -11   9 -16    1.35    0.36
 -11   9 -17    0.57    0.21
 -11   9 -17    0.41    0.20
 -11 -11  16    0.29    0.23
 -11 -11  15    2.15    0.55
 -11 -11  14    0.27    0.30
 -11 -11  13    0.90    0.35
 -11 -11  12    1.80    0.64
 -11 -11  11    1.23    0.44
 -11 -11  10   -0.38    0.57
 -11 -11   9    1.77    0.52
 -11 -11   8   21.60    2.26
 -11 -11   7    5.80    1.26
 -11  11   7    4.31    0.72
 -11 -11   6   14.35    1.84
 -11  11   6   11.58    1.26
 -11 -11   5    1.72    0.68
 -11 -11   4    0.31    0.26
 -11  11   3    2.20    0.51
 -11 -11   3    2.32    0.65
 -11  11   2    1.14    0.43
 -11 -11   2    0.84    0.41
 -11  11   1    5.42    0.82
 -11 -11   1    4.62    0.84
 -11  11   1    4.68    0.80
 -11  11   0    2.66    0.65
 -11 -11   0    1.80    0.44
 -11  11   0    1.69    0.43
 -11  11  -1    1.11    0.45
 -11  11  -1    0.98    0.38
 -11  11  -2    3.42    0.75
 -11  11  -2    2.31    0.60
 -11  11  -3    0.67    0.45
 -11  11  -3    0.51    0.32
 -11  11  -4    0.74    0.40
 -11  11  -4    0.67    0.35
 -11  11  -5    0.65    0.40
 -11  11  -5    0.36    0.29
 -11  11  -6   -0.15    0.27
 -11  11  -7    0.18    0.25
 -11  11  -7    0.59    0.41
 -11  11  -8    2.40    0.56
 -11  11  -8    1.88    0.51
 -11  11  -9   -0.44    0.39
 -11  11  -9    0.26    0.26
 -11  11 -10    0.98    0.41
 -11  11 -11    0.55    0.26
 -11  11 -12    1.20    0.42
 -11  11 -13    1.02    0.35
 -11  11 -14    0.55    0.25
 -11  11 -14    0.53    0.20
 -11  11 -15    0.17    0.10
 -11 -13  13    0.32    0.23
 -11 -13  12    0.68    0.41
 -11 -13  11    0.22    0.22
 -11 -13  10   -0.30    0.53
 -11 -13   9   -0.02    0.37
 -11 -13   8   -0.24    0.31
 -11 -13   7    0.65    0.57
 -11 -13   6    1.10    0.56
 -11  13   6    0.27    0.27
 -11  13   5    0.52    0.35
 -11 -13   5    0.18    0.34
 -11 -13   4    0.57    0.33
 -11  13   4    0.49    0.27
 -11  13   4    0.45    0.22
 -11  13   3    0.04    0.17
 -11  13   3    0.13    0.25
 -11 -13   3    0.22    0.29
 -11  13   2    0.42    0.35
 -11 -13   2   -0.02    0.15
 -11  13   2   -0.39    0.30
 -11  13   1    0.60    0.41
 -11  13   1    0.23    0.28
 -11  13   0    1.11    0.47
 -11  13   0    0.62    0.27
 -11  13  -1    0.49    0.36
 -11  13  -2   10.64    1.25
 -11  13  -3   15.18    1.51
 -11  13  -4    1.39    0.50
 -11  13  -5    0.43    0.30
 -11  13  -6    1.08    0.46
 -11  13  -6    0.93    0.45
 -11  13  -7    1.03    0.43
 -11  13  -7   -0.21    0.31
 -11  13  -8    2.59    0.56
 -11  13  -8    2.89    0.56
 -11  13  -9    0.75    0.27
 -11  13  -9    0.91    0.27
 -11  13 -10   -0.10    0.18
 -11  13 -11    0.08    0.18
 -11  13 -12   -0.07    0.13
 -11 -15   8   -0.19    0.22
 -11 -15   7   -0.33    0.22
 -11 -15   6    0.62    0.25
 -11  15   5    1.04    0.32
 -11 -15   5    1.32    0.34
 -11  15   4    2.58    0.53
 -11  15   3    0.01    0.21
 -11  15   2    0.21    0.26
 -11  15   2   -0.26    0.13
 -11  15   1    1.54    0.39
 -11  15   1    1.74    0.51
 -11  15   0    0.87    0.47
 -11  15   0    0.31    0.24
 -11  15  -1    3.50    0.74
 -11  15  -1    2.84    0.53
 -11  15  -2    1.56    0.39
 -11  15  -2    1.85    0.55
 -11  15  -3    1.06    0.43
 -11  15  -3    0.42    0.22
 -11  15  -4    0.20    0.26
 -11  15  -4    0.15    0.23
 -11  15  -5    0.21    0.21
 -11  15  -5   -0.41    0.23
 -11  15  -6    0.08    0.16
 -11  15  -6    0.07    0.12
 -11  15  -7   -0.17    0.14
 -11  15  -7    0.12    0.13
 -12   0  21    0.02    0.14
 -12   0  20   -0.01    0.23
 -12   0  19    1.16    0.50
 -12   0  18    0.76    0.52
 -12   0  17    5.40    1.09
 -12   0  16    1.40    0.61
 -12   0  15   -0.32    0.53
 -12   0  14    2.41    0.45
 -12   0  13    6.59    1.09
 -12   0  12    0.80    0.42
 -12   0  11   32.48    2.22
 -12   0  10   46.19    2.57
 -12   0   9   87.99    3.42
 -12   0   8  172.75    4.49
 -12   0   8  202.09   11.11
 -12   0   7   20.89    3.39
 -12   0   7   18.94    1.41
 -12   0   6   40.30    4.45
 -12   0   6   40.15    1.90
 -12   0   5   11.33    2.19
 -12   0   4   11.92    2.16
 -12   0   3    1.85    0.95
 -12   0   2   38.54    3.42
  12   0  -2   39.85    2.25
 -12   0   1    0.05    0.51
  12   0  -1    0.15    0.29
 -12   0   0    1.42    0.63
  12   0   0    0.99    0.60
  12   0   1   15.68    2.19
 -12   0  -1   16.08    1.72
  12   0   2    9.79    1.91
  12   0   3   11.75    2.22
  12   0   4   21.96    3.20
 -12   0  -5    2.93    0.47
  12   0   5    2.87    1.27
 -12   0  -6    0.31    0.19
  12   0   6    0.59    0.69
 -12   0  -6    0.23    0.15
 -12   0  -7    0.76    0.26
  12   0   7    0.69    0.74
 -12   0  -7    0.93    0.26
 -12   0  -8    0.17    0.17
 -12   0  -8    0.55    0.21
 -12   0  -8    0.32    0.27
 -12   0  -9    0.16    0.31
 -12   0  -9    1.65    0.38
  12   0   9    1.72    1.35
 -12   0  -9    0.96    0.27
 -12   0 -10    6.19    0.75
  12   0  10    6.67    2.31
 -12   0 -10    5.41    0.89
 -12   0 -11    2.01    0.70
 -12   0 -11    1.32    0.39
  12   0  11    1.69    1.32
 -12   0 -12    2.04    0.80
 -12   0 -12    0.58    0.29
  12   0  12    1.06    1.22
 -12   0 -13    1.64    0.47
 -12   0 -13    3.35    0.93
  12   0  13    1.63    1.13
 -12   0 -14    2.88    0.84
 -12   0 -14    1.05    0.39
 -12   0 -15    0.93    0.54
 -12   0 -15   -0.19    0.28
 -12   0 -16    1.55    0.60
 -12   0 -16    1.16    0.40
 -12   0 -17    4.46    0.77
 -12   0 -17    4.29    0.82
 -12   0 -18    1.50    0.41
 -12   0 -18    1.48    0.39
 -12   0 -19    0.80    0.28
 -12   0 -20    1.57    0.33
 -12  -2  21    0.68    0.31
 -12  -2  20    0.44    0.32
 -12   2  19    0.21    0.23
 -12  -2  19    0.76    0.48
 -12   2  18    0.71    0.33
 -12  -2  18    2.18    0.80
 -12   2  17    1.28    0.51
 -12  -2  17    1.88    0.84
 -12   2  16    0.44    0.33
 -12  -2  16   -0.75    0.63
 -12   2  15    0.11    0.28
 -12  -2  15   -1.85    0.68
 -12   2  14   -0.31    0.45
 -12  -2  14   -0.19    0.64
 -12   2  13   -0.41    0.52
 -12  -2  13   -0.74    0.58
 -12   2  12    0.79    0.23
 -12  -2  12    1.79    0.63
 -12   2  11    2.48    0.59
 -12   2  11    3.38    1.46
 -12  -2  11    2.38    0.50
 -12  -2  11    3.62    0.87
 -12   2  10    2.44    0.60
 -12   2  10    3.35    1.71
 -12  -2  10    1.47    0.40
 -12  -2  10    3.50    0.81
 -12   2   9    0.03    0.14
 -12  -2   9    0.35    0.34
 -12   2   9    0.77    0.98
 -12  -2   9   -0.47    0.37
 -12  -2   8    3.02    0.61
 -12   2   8    3.89    1.57
 -12   2   8    3.69    0.61
 -12  -2   8    3.63    0.67
 -12   2   7    1.82    0.42
 -12  -2   7    1.61    0.44
 -12   2   7    1.81    1.10
 -12  -2   7    1.37    0.34
 -12  -2   6   19.83    1.34
 -12   2   6   18.05    3.15
 -12  -2   6   16.87    1.26
 -12   2   5    5.41    1.71
 -12   2   4    0.64    0.80
 -12   2   3   16.16    2.61
  12  -2  -2   11.76    1.34
  12   2  -2   12.85    1.60
 -12   2   2   11.60    2.09
  12   2  -1   -0.34    0.46
  12  -2  -1    0.80    0.51
  12   2   0    7.99    1.63
  12  -2   0    9.50    1.63
  12   2   1   -0.12    0.46
  12  -2   1    0.08    0.52
  12   2   2   38.23    4.06
  12  -2   2   46.65    4.11
  12   2   3   13.12    2.55
  12  -2   3   14.81    2.52
 -12   2  -4   23.51    1.37
  12   2   4   23.80    3.64
  12  -2   4   26.51    3.50
 -12   2  -4   26.91    1.28
 -12  -2  -4   26.10    1.37
  12   2   5    3.56    1.27
 -12   2  -5    3.82    0.59
 -12  -2  -5    3.25    0.54
 -12   2  -5    4.35    0.60
  12  -2   5    2.88    1.32
 -12   2  -5    3.49    0.51
 -12   2  -6    1.48    0.38
  12   2   6    1.15    1.00
 -12   2  -6    1.39    0.26
 -12  -2  -6    1.41    0.29
  12  -2   6    0.85    0.82
 -12   2  -6    2.09    0.47
 -12  -2  -6    1.35    0.40
  12   2   7    5.57    1.98
 -12  -2  -7    4.31    0.49
 -12   2  -7    6.04    0.74
 -12  -2  -7    4.39    0.65
 -12   2  -7    4.13    0.50
  12  -2   7    4.80    1.91
 -12  -2  -8    9.11    0.75
 -12   2  -8   10.54    0.85
  12   2   8   10.67    2.86
  12  -2   8    8.52    2.64
 -12  -2  -8    9.97    1.11
 -12  -2  -8   11.67    0.80
 -12   2  -8   11.29    1.01
 -12  -2  -9   32.00    1.60
 -12   2  -9   35.52    1.72
  12   2   9   38.63    5.37
  12  -2   9   32.47    5.14
 -12   2  -9   37.10    1.79
 -12  -2  -9   31.31    2.02
 -12  -2 -10    5.97    0.77
 -12   2 -10    7.11    0.86
 -12   2 -10    6.95    0.74
  12   2  10    7.34    2.33
 -12  -2 -10    4.73    0.81
  12  -2  10    6.04    2.18
 -12  -2 -11    0.39    0.29
 -12  -2 -11   -0.30    0.28
 -12   2 -11    0.67    0.36
  12   2  11    0.57    0.87
 -12   2 -11    0.27    0.16
  12  -2  11    0.01    0.51
 -12  -2 -12    0.41    0.45
 -12  -2 -12    0.13    0.25
 -12   2 -12    0.22    0.34
  12   2  12    1.46    1.11
  12  -2  12   -0.41    0.69
 -12  -2 -13    0.75    0.40
 -12  -2 -13    0.39    0.18
 -12   2 -13    0.52    0.30
  12   2  13    1.22    0.72
  12  -2  13    0.71    0.69
 -12  -2 -14    1.20    0.51
 -12  -2 -14    0.86    0.39
 -12   2 -14    1.31    0.44
 -12  -2 -15    3.22    0.68
 -12   2 -15    3.69    0.72
 -12   2 -15    3.99    1.08
 -12  -2 -15    3.37    0.75
 -12   2 -16    0.43    0.24
 -12  -2 -16    0.21    0.22
 -12   2 -17    1.37    0.53
 -12   2 -17    0.54    0.25
 -12  -2 -17    0.79    0.30
 -12   2 -18    0.12    0.26
 -12   2 -18   -0.23    0.21
 -12  -2 -18   -0.32    0.26
 -12   2 -19    0.09    0.14
 -12  -2 -19    0.30    0.13
 -12   2 -20    0.11    0.13
 -12  -4  21    0.30    0.20
 -12  -4  20    1.46    0.53
 -12  -4  19    1.17    0.64
 -12  -4  18    1.87    0.82
 -12  -4  17    2.77    0.89
 -12  -4  16    0.07    0.54
 -12  -4  15    3.51    0.77
 -12  -4  14    2.65    0.57
 -12  -4  14    1.43    0.27
 -12  -4  13    0.23    0.21
 -12  -4  13   -0.25    0.55
 -12   4  13   -0.17    0.19
 -12   4  12    0.40    0.64
 -12   4  12    0.18    0.26
 -12  -4  12    0.31    0.40
 -12  -4  12    0.05    0.23
 -12  -4  11    0.02    0.30
 -12   4  11    1.20    0.39
 -12  -4  11    1.90    0.69
 -12   4  11    0.53    0.58
 -12  -4  10    0.99    0.57
 -12  -4  10   -0.02    0.34
 -12   4  10    0.91    0.32
 -12   4  10    0.64    1.09
 -12   4   9    2.10    1.15
 -12  -4   9    1.99    0.54
 -12   4   9    3.43    0.58
 -12  -4   9    3.81    0.73
 -12   4   8    0.94    0.33
 -12   4   8    0.57    0.92
 -12  -4   8    0.44    0.25
 -12  -4   8    0.41    0.38
 -12  -4   7    0.63    0.24
 -12  -4   7    1.27    0.49
 -12   4   7    0.71    0.29
 -12   4   7    1.16    0.87
 -12  -4   6    0.64    0.26
 -12   4   6    1.09    0.31
 -12   4   6    1.03    0.95
 -12  -4   6    1.33    0.49
 -12   4   6    0.76    0.22
 -12  -4   5    8.46    1.02
 -12   4   5    8.35    2.27
 -12   4   5    7.38    0.71
 -12  -4   5    8.90    0.86
 -12  -4   4   11.73    1.16
 -12   4   4   14.39    2.74
 -12  -4   4   12.22    1.01
 -12   4   4   13.56    0.97
 -12  -4   4   11.28    0.91
 -12   4   3   85.46    6.52
 -12  -4   3   88.23    3.00
 -12  -4   3   83.61    2.60
 -12   4   3   82.55    2.45
 -12  -4   2   18.26    1.20
 -12  -4   2   18.64    1.34
 -12   4   2   16.76    1.15
 -12  -4   1    1.63    0.44
 -12   4   1    1.20    0.34
 -12  -4   1    2.02    0.46
  12  -4  -1    1.44    0.79
 -12   4   0   23.92    1.37
  12  -4   0   25.55    2.76
 -12  -4   0   26.67    1.45
 -12   4  -1   10.51    0.94
 -12   4  -1   10.81    0.83
 -12  -4  -1    8.63    0.84
 -12  -4  -1    9.26    0.83
  12  -4   1    9.29    1.90
 -12   4  -2   43.42    1.85
  12  -4   2   37.80    4.06
 -12   4  -2   39.78    1.63
 -12  -4  -2   32.74    1.57
 -12  -4  -2   37.48    1.64
 -12   4  -3    0.87    0.31
 -12   4  -3    1.21    0.33
 -12  -4  -3    0.88    0.31
 -12  -4  -3    0.59    0.24
  12  -4   3    1.01    0.51
 -12   4  -4    2.12    0.44
 -12   4  -4    2.20    0.46
 -12  -4  -4    2.47    0.41
 -12  -4  -4    2.31    0.45
  12  -4   4    3.16    1.35
 -12   4  -5    1.75    0.40
 -12   4  -5    1.97    0.48
 -12  -4  -5    1.77    0.35
 -12  -4  -5    1.77    0.40
  12  -4   5    2.15    1.30
 -12   4  -6   -0.01    0.12
 -12   4  -6    0.25    0.18
 -12   4  -6    0.25    0.26
 -12  -4  -6    0.23    0.18
 -12  -4  -6    0.41    0.27
  12  -4   6    0.35    0.55
 -12   4  -7    0.10    0.15
  12   4   7   -0.49    1.04
 -12   4  -7   -0.07    0.16
 -12  -4  -7   -0.15    0.12
 -12  -4  -7    0.15    0.23
  12  -4   7   -0.53    1.09
 -12   4  -8    1.74    0.32
 -12   4  -8    2.35    0.49
  12   4   8    1.82    1.25
  12  -4   8    1.08    1.01
 -12  -4  -8    1.97    0.51
 -12   4  -9   13.50    1.18
  12   4   9   16.71    3.80
  12  -4   9   14.33    3.47
 -12  -4  -9   14.32    1.32
 -12   4 -10    0.25    0.22
  12   4  10   -0.62    1.06
  12  -4  10    0.05    0.61
 -12  -4 -10   -0.01    0.18
 -12   4 -11    4.41    0.75
  12   4  11    4.73    2.18
 -12   4 -11    4.45    0.75
 -12  -4 -11    4.88    0.79
  12  -4  11    5.67    2.25
 -12   4 -12    0.35    0.23
  12   4  12    1.55    1.24
 -12   4 -12    0.67    0.28
 -12  -4 -12    0.08    0.25
  12  -4  12    1.13    1.35
 -12   4 -13    4.14    0.76
 -12  -4 -13    3.75    0.69
 -12   4 -14    1.03    0.41
 -12  -4 -14    0.94    0.35
 -12   4 -15    2.00    0.55
 -12  -4 -15    1.44    0.48
 -12   4 -16    2.04    0.76
 -12   4 -16    1.36    0.45
 -12  -4 -16    0.95    0.33
 -12   4 -17    0.05    0.33
 -12   4 -17    0.31    0.24
 -12  -4 -17    0.27    0.17
 -12   4 -18    2.05    0.56
 -12   4 -18    1.52    0.40
 -12   4 -19    0.88    0.35
 -12   4 -19    0.09    0.16
 -12   4 -20    0.24    0.19
 -12  -6  20    1.35    0.40
 -12  -6  19    0.68    0.40
 -12  -6  18    2.75    0.77
 -12  -6  17    0.53    0.52
 -12  -6  16    1.03    0.66
 -12  -6  15    6.17    0.96
 -12  -6  15    4.85    1.00
 -12  -6  14   -0.55    0.66
 -12  -6  14    0.52    0.23
 -12  -6  13    3.68    0.77
 -12  -6  13    5.05    0.96
 -12  -6  12   -0.25    0.37
 -12  -6  12   -0.34    0.43
 -12   6  12   -0.25    0.58
 -12  -6  11    1.76    0.47
 -12  -6  11    1.39    0.51
 -12   6  11    2.01    1.19
 -12   6  10    5.11    2.07
 -12  -6  10    2.45    0.63
 -12  -6  10    4.41    0.83
 -12   6   9   34.24    4.95
 -12  -6   9   28.71    2.06
 -12  -6   8    4.10    0.90
 -12   6   8    4.91    2.01
 -12  -6   8    4.26    0.74
 -12  -6   7    0.36    0.16
 -12   6   7    0.94    0.93
 -12  -6   7    0.94    0.52
 -12   6   7    0.57    0.15
 -12   6   6    7.20    2.44
 -12  -6   6    8.09    1.16
 -12   6   6    6.31    0.75
 -12  -6   6    8.07    0.86
 -12  -6   5    1.31    0.31
 -12  -6   5    1.22    0.45
 -12   6   5    1.21    0.34
 -12   6   5    1.24    0.88
 -12   6   4    6.08    2.02
 -12   6   4    4.39    0.71
 -12  -6   4    6.56    0.99
 -12  -6   4    5.55    0.61
 -12   6   3    0.30    0.25
 -12  -6   3   -0.07    0.22
 -12  -6   2    1.60    0.49
 -12   6   2    1.15    0.41
 -12  -6   1    0.35    0.30
 -12  -6   0    4.66    0.72
 -12  -6  -1    0.45    0.29
 -12   6  -1   -0.20    0.25
 -12  -6  -1    0.50    0.35
  12  -6   1    0.22    0.33
 -12   6  -2   32.17    1.88
 -12  -6  -2   29.80    1.59
 -12   6  -2   32.32    1.71
  12  -6   2   29.50    3.92
 -12  -6  -2   27.43    1.74
 -12  -6  -3   17.62    1.16
  12  -6   3   15.69    2.95
 -12  -6  -3   15.85    1.30
 -12   6  -3   18.42    1.44
 -12   6  -3   17.00    1.34
  12  -6   4    2.79    1.21
 -12   6  -4    2.98    0.60
 -12   6  -4    2.18    0.39
 -12   6  -4    1.95    0.48
 -12  -6  -4    2.47    0.51
 -12  -6  -4    2.08    0.48
 -12   6  -5   11.96    1.27
 -12   6  -5   11.68    0.95
 -12   6  -5   13.83    1.19
  12  -6   5   11.93    2.78
 -12  -6  -5   14.35    1.13
 -12  -6  -5   14.19    1.20
  12  -6   6    0.68    0.88
 -12   6  -6    0.03    0.22
 -12   6  -6    0.05    0.20
 -12  -6  -6    0.16    0.21
 -12   6  -6    0.52    0.34
  12  -6   7    5.85    2.24
 -12   6  -7    6.32    0.79
 -12   6  -7    6.11    0.90
 -12  -6  -7    5.98    0.80
 -12   6  -7    6.34    0.78
  12  -6   8    1.18    0.98
  12   6   8    1.53    1.12
 -12   6  -8    1.42    0.42
 -12   6  -8    1.51    0.37
 -12  -6  -8    1.83    0.48
  12  -6   9    0.48    0.81
 -12   6  -9   -0.06    0.17
  12   6   9    0.16    0.83
 -12  -6  -9   -0.11    0.23
  12  -6  10    6.05    2.12
 -12   6 -10    8.27    1.06
  12   6  10    9.70    2.93
 -12  -6 -10    8.69    0.96
  12  -6  11    0.33    0.66
 -12   6 -11    0.10    0.18
  12   6  11    1.36    1.39
 -12  -6 -11    0.53    0.27
 -12   6 -12    4.10    0.78
 -12  -6 -12    5.07    0.69
 -12   6 -13    2.19    0.58
 -12   6 -13    2.22    0.51
 -12   6 -14    2.66    0.62
 -12   6 -15    7.22    0.95
 -12   6 -16    1.48    0.62
 -12   6 -16    1.05    0.36
 -12   6 -17   -0.07    0.24
 -12   6 -17   -0.06    0.14
 -12   6 -18    1.72    0.50
 -12   6 -18    1.13    0.33
 -12   6 -19    0.23    0.18
 -12   6 -19    0.11    0.12
 -12  -8  18    0.42    0.23
 -12  -8  17    0.68    0.36
 -12  -8  17    0.53    0.22
 -12  -8  16    2.46    0.66
 -12  -8  16    1.89    0.50
 -12  -8  15    0.73    0.34
 -12  -8  15    1.68    0.56
 -12  -8  14   -0.12    0.40
 -12  -8  14    0.78    0.44
 -12  -8  13   -0.68    0.44
 -12  -8  13   -0.26    0.52
 -12  -8  12   -0.57    0.49
 -12  -8  12   -0.15    0.40
 -12  -8  11    0.70    0.25
 -12  -8  11   -0.10    0.47
 -12  -8  10    0.62    0.29
 -12   8  10    0.92    1.07
 -12  -8  10   -0.27    0.59
 -12  -8   9    0.64    0.29
 -12  -8   9    0.00    0.39
 -12  -8   8    2.66    0.85
 -12   8   8    2.67    1.38
 -12   8   7    0.51    0.83
 -12  -8   7    0.76    0.58
 -12   8   7    0.03    0.19
 -12   8   6    0.24    0.77
 -12  -8   6    0.45    0.47
 -12   8   6    0.15    0.22
 -12   8   5    0.84    0.92
 -12   8   5    0.29    0.29
 -12  -8   5    0.42    0.40
 -12   8   4   12.63    2.86
 -12  -8   4   12.25    1.50
 -12  -8   3    5.82    0.97
 -12  -8   2    1.35    0.51
 -12  -8   1    0.17    0.21
 -12  -8   0    0.49    0.31
 -12  -8  -1    6.61    0.83
 -12   8  -1    6.00    0.79
 -12   8  -2    5.72    0.67
 -12  -8  -2    5.18    0.69
 -12   8  -2    4.87    0.73
 -12   8  -3    2.44    0.50
 -12   8  -3    2.46    0.55
 -12   8  -4   12.94    1.14
 -12   8  -4   11.65    1.18
  12  -8   4   12.98    2.41
 -12   8  -5   19.94    1.51
 -12   8  -5   23.11    1.65
 -12   8  -5   21.53    1.66
 -12   8  -6    0.20    0.25
 -12   8  -6    0.70    0.42
 -12   8  -6    0.60    0.35
 -12   8  -7    9.12    1.09
  12  -8   7    9.75    2.86
 -12   8  -7    9.76    1.09
 -12   8  -8    2.57    0.52
 -12   8  -8    2.52    0.56
  12  -8   8    2.50    1.49
 -12   8  -9    0.05    0.25
 -12   8  -9    0.18    0.20
 -12   8 -10    0.18    0.26
 -12   8 -11    0.49    0.28
 -12   8 -12   -0.08    0.20
 -12   8 -13    0.40    0.29
 -12   8 -13    0.06    0.20
 -12   8 -14    0.03    0.15
 -12   8 -14    0.04    0.15
 -12   8 -15    0.80    0.39
 -12   8 -15    0.78    0.33
 -12   8 -16    0.47    0.30
 -12   8 -16    0.37    0.23
 -12   8 -17    1.37    0.37
 -12   8 -17    1.06    0.28
 -12 -10  16    0.76    0.32
 -12 -10  15    0.21    0.34
 -12 -10  14    0.36    0.38
 -12 -10  13    6.05    1.07
 -12 -10  12   -0.23    0.41
 -12 -10  11    5.40    1.09
 -12 -10  10   -0.72    0.69
 -12 -10   9    1.17    0.49
 -12 -10   8    0.76    0.45
 -12  10   7    5.05    0.77
 -12 -10   7    6.91    1.34
 -12  10   6    2.81    0.64
 -12 -10   6    3.41    0.95
 -12  10   5    1.39    0.55
 -12 -10   5    2.49    0.75
 -12  10   5    2.24    1.18
 -12  10   4   -0.27    0.95
 -12 -10   4    0.98    0.54
 -12  10   3    0.65    0.72
 -12 -10   3    1.29    0.51
 -12 -10   2    0.82    0.41
 -12 -10   1    0.29    0.31
 -12  10   1    0.01    0.29
 -12  10   0    0.26    0.27
 -12 -10   0    0.24    0.21
 -12  10   0   -0.16    0.31
 -12  10  -1    1.82    0.47
 -12 -10  -1    1.47    0.41
 -12  10  -1    0.51    0.30
 -12  10  -2    0.76    0.29
 -12  10  -2    0.69    0.37
 -12  10  -3    1.18    0.48
 -12  10  -3    0.58    0.40
 -12  10  -4    0.26    0.26
 -12  10  -4    0.31    0.32
 -12  10  -5    0.55    0.35
 -12  10  -5    0.69    0.38
 -12  10  -6   -0.03    0.22
 -12  10  -6    0.17    0.27
 -12  10  -6    0.41    0.40
 -12  10  -7    0.38    0.34
 -12  10  -7   -0.10    0.26
 -12  10  -8    1.43    0.44
 -12  10  -8    2.03    0.56
 -12  10  -9    0.44    0.30
 -12  10  -9    0.96    0.37
 -12  10 -10    0.12    0.20
 -12  10 -11   -0.07    0.19
 -12  10 -12    0.21    0.25
 -12  10 -13    0.12    0.18
 -12  10 -13   -0.30    0.24
 -12  10 -14    1.04    0.33
 -12  10 -14    0.58    0.21
 -12  10 -15    1.96    0.39
 -12 -12  14    1.21    0.43
 -12 -12  13    1.14    0.45
 -12 -12  12    0.75    0.42
 -12 -12  11    0.85    0.34
 -12 -12  10   -0.50    0.59
 -12 -12   9   -0.39    0.46
 -12 -12   8    0.98    0.48
 -12  12   7    2.43    0.52
 -12 -12   7    3.99    1.06
 -12 -12   6    1.74    0.69
 -12  12   6    1.28    0.49
 -12  12   5    0.69    0.47
 -12 -12   5    0.39    0.35
 -12  12   4    3.92    0.85
 -12 -12   4    5.35    1.03
 -12 -12   3    1.58    0.51
 -12  12   3    2.07    0.57
 -12 -12   2    0.08    0.22
 -12  12   2   -0.23    0.20
 -12  12   1    0.22    0.29
 -12 -12   1   -0.16    0.26
 -12  12   1   -0.21    0.24
 -12  12   0    3.54    0.66
 -12  12   0    2.58    0.60
 -12  12  -1    0.53    0.40
 -12  12  -1    0.16    0.19
 -12  12  -2    2.21    0.58
 -12  12  -2    2.17    0.54
 -12  12  -3   13.88    1.40
 -12  12  -3   11.58    1.12
 -12  12  -4    0.48    0.33
 -12  12  -4    0.55    0.25
 -12  12  -5    1.93    0.65
 -12  12  -5    1.65    0.49
 -12  12  -6    0.37    0.42
 -12  12  -6    0.26    0.28
 -12  12  -7    0.92    0.44
 -12  12  -7    0.87    0.39
 -12  12  -8    2.03    0.52
 -12  12  -8    2.30    0.53
 -12  12  -9    2.61    0.56
 -12  12  -9    2.78    0.47
 -12  12 -10    0.06    0.16
 -12  12 -11    0.94    0.32
 -12  12 -12    0.06    0.11
 -12  12 -13    0.28    0.15
 -12  12 -13    0.51    0.19
 -12 -14  11    0.14    0.17
 -12 -14  10    1.94    0.50
 -12 -14   9    3.14    0.64
 -12 -14   8    6.06    0.88
 -12  14   8    1.09    0.31
 -12 -14   7    0.09    0.17
 -12  14   7   -0.29    0.25
 -12  14   6   -0.15    0.18
 -12 -14   6    0.04    0.25
 -12  14   6   -0.29    0.22
 -12  14   5   -0.05    0.16
 -12 -14   5   -0.27    0.28
 -12  14   5   -0.01    0.19
 -12  14   4    0.44    0.31
 -12 -14   4    0.20    0.26
 -12  14   4    0.10    0.17
 -12  14   3    0.32    0.22
 -12  14   3    0.33    0.28
 -12  14   2    1.15    0.52
 -12  14   1    0.43    0.39
 -12  14   0    0.48    0.39
 -12  14   0   -0.04    0.22
 -12  14  -1    1.19    0.57
 -12  14  -1    1.21    0.37
 -12  14  -2    2.21    0.52
 -12  14  -2    2.51    0.65
 -12  14  -3    2.17    0.50
 -12  14  -3    2.37    0.63
 -12  14  -4    2.31    0.62
 -12  14  -4    2.11    0.51
 -12  14  -5    0.42    0.30
 -12  14  -5   -0.13    0.25
 -12  14  -6    0.17    0.21
 -12  14  -6   -0.01    0.21
 -12  14  -7    0.02    0.14
 -12  14  -7    0.22    0.21
 -12  14  -8    1.14    0.30
 -12  14  -8    1.26    0.29
 -12  14  -9    3.26    0.45
 -12  16   2    0.00    0.14
 -12  16   1    0.09    0.14
 -12  16   0    0.28    0.22
 -12  16  -1    0.15    0.19
 -12  16  -2    0.36    0.19
 -13  -1  21    2.99    0.53
 -13  -1  20    0.24    0.26
 -13   1  20    0.15    0.16
 -13   1  19    0.63    0.34
 -13  -1  19    0.94    0.51
 -13   1  18    0.82    0.39
 -13  -1  18    0.97    0.58
 -13   1  17    0.42    0.37
 -13  -1  17    0.52    0.57
 -13   1  16    0.62    0.51
 -13  -1  16    0.94    0.53
 -13   1  15    0.04    0.32
 -13  -1  15    0.07    0.49
 -13   1  14    1.21    0.35
 -13  -1  14    0.22    0.64
 -13   1  13    0.17    0.42
 -13  -1  13    0.21    0.68
 -13   1  12    1.92    0.55
 -13  -1  12    1.99    0.52
 -13   1  11    3.71    0.76
 -13  -1  11    3.64    0.77
 -13   1  10   26.53    1.96
 -13  -1  10   27.06    2.07
 -13  -1   9   13.23    1.12
 -13   1   9   18.35    3.71
 -13   1   9   16.87    1.54
 -13  -1   9   17.05    1.60
 -13  -1   8    3.13    0.70
 -13  -1   8    2.73    0.53
 -13   1   8    5.08    1.78
 -13   1   8    5.39    0.82
 -13   1   7    1.25    0.75
 -13   1   7    1.92    0.49
 -13  -1   7    2.23    0.54
 -13  -1   7    2.79    0.55
 -13  -1   6    0.78    0.31
 -13   1   6    0.43    0.46
 -13  -1   6    0.51    0.30
 -13   1   6    0.61    0.28
 -13  -1   5   31.34    1.72
 -13   1   5   28.75    3.76
 -13   1   5   30.18    1.70
 -13  -1   5   27.18    3.46
 -13  -1   5   28.37    1.67
 -13  -1   4    0.30    0.21
 -13   1   4    0.02    0.56
 -13  -1   4   -0.25    0.57
 -13  -1   3    0.41    0.28
 -13   1   3    0.84    0.58
 -13   1   2   11.22    2.10
 -13  -1   2   10.03    1.60
  13   1  -1   12.67    1.68
  13  -1  -1   12.10    1.58
 -13   1   1   12.51    2.03
 -13  -1   1    9.71    1.35
 -13   1   0    1.47    0.60
  13   1   0    1.51    0.73
  13  -1   0    1.52    0.67
  13   1   1    7.33    1.61
  13  -1   1    7.62    1.59
  13   1   2   65.74    5.28
  13  -1   2   73.70    5.21
  13   1   3    9.93    2.22
  13  -1   3   10.57    2.13
 -13  -1  -3   10.55    0.85
 -13   1  -3    9.19    0.86
 -13  -1  -3   11.03    0.87
 -13   1  -3   10.98    0.91
 -13  -1  -3   10.99    0.85
  13   1   4   20.95    3.31
  13  -1   4   25.07    3.45
 -13  -1  -4   23.94    1.44
 -13  -1  -4   23.31    1.29
 -13   1  -4   19.73    1.30
 -13   1  -4   21.74    1.20
 -13   1  -4   25.33    1.39
 -13   1  -4   21.36    1.37
 -13  -1  -4   24.41    1.31
 -13   1  -5    0.46    0.24
  13   1   5    0.89    0.73
  13  -1   5    0.22    0.48
 -13  -1  -5    0.41    0.17
 -13   1  -5    0.26    0.20
 -13  -1  -5    0.45    0.26
 -13   1  -6    3.40    0.59
 -13  -1  -6    4.25    0.56
 -13   1  -6    4.12    0.61
  13   1   6    3.36    1.51
 -13  -1  -6    3.87    0.68
  13  -1   6    4.69    1.75
 -13  -1  -7    2.42    0.56
 -13   1  -7    2.43    0.58
 -13  -1  -7    3.11    0.48
 -13   1  -7    3.15    0.53
  13   1   7    2.55    1.22
  13  -1   7    2.53    1.47
 -13  -1  -8    8.77    0.73
 -13   1  -8   10.48    0.80
  13   1   8   10.43    2.80
  13  -1   8    9.38    2.60
 -13  -1  -8   10.91    0.86
 -13   1  -8   11.60    1.00
 -13  -1  -8   10.15    1.17
 -13   1  -8    9.38    1.14
 -13  -1  -9   36.84    1.66
 -13   1  -9   37.37    1.67
  13   1   9   38.41    5.36
  13  -1   9   36.47    5.28
 -13  -1  -9   37.71    1.57
 -13   1  -9   36.34    1.75
 -13  -1  -9   32.35    2.19
 -13   1  -9   28.81    2.14
 -13  -1 -10   13.70    1.14
 -13   1 -10   15.10    1.17
  13   1  10   15.44    3.43
  13  -1  10   16.23    3.66
 -13   1 -10   13.36    1.03
 -13  -1 -10   10.49    1.30
 -13   1 -10   13.21    1.52
 -13  -1 -11    0.56    0.38
 -13   1 -11    1.27    0.62
 -13  -1 -11    0.32    0.16
 -13   1 -11    0.56    0.29
  13   1  11    0.53    0.45
  13  -1  11    0.76    0.58
 -13  -1 -12    2.30    0.81
 -13  -1 -12    1.78    0.45
 -13   1 -12    1.92    0.52
  13   1  12    1.26    1.04
 -13   1 -12    3.30    1.06
  13  -1  12    0.79    1.04
 -13  -1 -13    0.44    0.44
 -13  -1 -13   -0.19    0.31
 -13   1 -13    0.03    0.21
 -13  -1 -14    8.56    1.06
 -13   1 -14    8.03    1.03
 -13  -1 -14   10.54    1.36
 -13   1 -14   10.70    1.56
 -13  -1 -15    9.88    1.14
 -13   1 -15   10.07    1.15
 -13  -1 -15   10.23    1.30
 -13   1 -15   11.58    1.52
 -13   1 -16    2.72    0.73
 -13  -1 -16    3.26    0.66
 -13   1 -16    2.79    0.60
 -13  -1 -16    3.25    0.69
 -13   1 -17    1.38    0.53
 -13   1 -17    1.35    0.42
 -13  -1 -17    1.26    0.43
 -13   1 -18    0.95    0.35
 -13  -1 -18    1.27    0.38
 -13   1 -18    1.16    0.43
 -13  -1 -19   -0.09    0.19
 -13   1 -19    0.16    0.18
 -13   1 -20    2.94    0.43
 -13  -3  21    0.27    0.23
 -13  -3  20    0.18    0.28
 -13  -3  19    0.50    0.44
 -13  -3  18    2.38    0.80
 -13  -3  17    0.80    0.70
 -13   3  17   -0.09    0.22
 -13   3  16    1.38    0.49
 -13  -3  16    1.88    0.77
 -13   3  15    1.16    0.42
 -13  -3  15    0.40    0.40
 -13   3  14    0.52    0.30
 -13  -3  14   -0.91    0.92
 -13   3  13   -0.42    0.34
 -13  -3  13   -0.88    0.81
 -13   3  12    0.34    0.25
 -13  -3  12    0.07    0.41
 -13  -3  12    0.60    0.36
 -13   3  11    0.16    0.22
 -13  -3  11   -0.37    0.42
 -13  -3  11    0.16    0.24
 -13   3  11    0.36    0.75
 -13   3  10    2.48    0.62
 -13  -3  10    1.78    0.53
 -13   3  10    2.65    1.31
 -13  -3  10    1.15    0.42
 -13  -3   9    3.48    0.65
 -13   3   9    6.74    2.25
 -13   3   9    5.88    0.86
 -13  -3   9    4.96    0.89
 -13  -3   8    2.98    0.63
 -13   3   8    2.40    1.44
 -13  -3   8    2.09    0.49
 -13   3   8    3.17    0.62
 -13   3   7    0.48    0.64
 -13  -3   7    0.35    0.26
 -13  -3   7   -0.06    0.17
 -13   3   7    0.29    0.22
 -13   3   6    1.19    0.39
 -13  -3   6    2.27    0.53
 -13  -3   6    1.51    0.51
 -13  -3   6    1.60    0.41
 -13   3   6    1.40    0.32
 -13   3   6    2.04    1.38
 -13   3   5    5.23    0.61
 -13  -3   5    4.53    0.75
 -13  -3   5    5.02    0.65
 -13   3   5    6.09    2.00
 -13   3   5    4.95    0.67
 -13  -3   5    4.81    0.70
 -13   3   4    7.06    1.94
 -13  -3   4    8.12    1.02
 -13  -3   4    7.94    0.82
 -13   3   4    6.53    0.76
 -13   3   4    6.84    0.79
 -13  -3   4    7.79    0.84
 -13   3   3   31.68    1.66
 -13  -3   3   36.90    1.99
 -13   3   3   34.81    4.14
 -13  -3   3   33.78    1.61
 -13  -3   3   31.69    1.59
 -13   3   2    4.04    1.26
 -13  -3   2    5.46    0.76
  13   3  -2    3.53    1.04
  13  -3  -2    3.50    0.80
 -13  -3   2    5.23    0.65
 -13   3   2    3.82    0.58
  13  -3  -1    1.07    0.50
  13   3  -1   -0.09    0.64
 -13  -3   1    1.35    0.40
 -13   3   1    0.65    0.24
 -13  -3   1    1.12    0.31
  13   3   0    0.27    0.43
 -13  -3   0    0.02    0.23
 -13   3   0   -0.08    0.14
 -13   3   0    0.02    0.15
 -13  -3   0    0.08    0.13
 -13  -3   0   -0.08    0.12
 -13   3   0   -0.13    0.22
  13  -3   0    0.23    0.37
 -13   3  -1    2.98    0.48
  13   3   1    2.32    0.85
 -13  -3  -1    3.34    0.56
 -13   3  -1    2.53    0.40
 -13  -3  -1    2.44    0.45
 -13  -3  -1    2.60    0.47
 -13   3  -1    2.16    0.48
 -13   3  -1    3.08    0.49
  13  -3   1    3.50    1.24
  13  -3   2    7.54    1.84
 -13   3  -2    6.48    0.70
  13   3   2    5.87    1.61
 -13  -3  -2    5.86    0.68
 -13   3  -2    5.64    0.74
 -13  -3  -2    5.75    0.69
 -13   3  -2    7.39    0.82
 -13   3  -2    8.02    0.82
 -13   3  -3    8.08    0.83
  13  -3   3    8.21    2.00
 -13   3  -3    6.37    0.70
  13   3   3    6.04    1.72
 -13  -3  -3    7.06    0.75
 -13   3  -3    4.97    0.71
 -13  -3  -3    7.40    0.79
 -13   3  -3    7.00    0.85
 -13  -3  -3    7.00    0.63
  13   3   4   14.46    3.04
  13  -3   4   13.35    2.64
 -13   3  -4   13.64    1.12
 -13  -3  -4   14.31    1.04
 -13  -3  -4   14.91    1.16
 -13   3  -4   17.11    1.12
 -13  -3  -4   14.52    0.93
 -13   3  -4   17.11    1.18
 -13   3  -5   -0.39    0.28
 -13   3  -5    0.25    0.23
  13   3   5    0.33    0.62
 -13   3  -5   -0.07    0.18
 -13  -3  -5    0.03    0.13
 -13   3  -5    0.55    0.34
  13  -3   5   -0.46    0.83
 -13  -3  -5    0.22    0.27
 -13   3  -6   -0.12    0.26
 -13   3  -6    0.49    0.29
  13   3   6   -0.20    0.78
 -13   3  -6    0.19    0.18
 -13  -3  -6   -0.02    0.17
 -13   3  -6    0.42    0.38
  13  -3   6    0.16    0.69
 -13  -3  -6    0.32    0.26
 -13   3  -7    0.31    0.18
 -13   3  -7    0.76    0.25
 -13   3  -7    0.60    0.22
  13   3   7    0.53    0.99
 -13  -3  -7    0.96    0.29
 -13   3  -7    1.08    0.51
  13  -3   7    0.43    0.58
 -13  -3  -7    0.79    0.37
 -13   3  -8    1.84    0.39
  13   3   8    2.31    1.26
 -13  -3  -8    2.53    0.40
 -13   3  -8    2.27    0.56
  13  -3   8    1.21    0.82
 -13  -3  -8    2.32    0.59
 -13   3  -9    2.07    0.45
  13   3   9    1.38    1.17
 -13   3  -9    2.30    0.53
  13  -3   9    0.79    0.84
 -13  -3  -9    2.31    0.59
 -13   3 -10   -0.06    0.26
  13   3  10   -0.08    0.95
 -13   3 -10   -0.07    0.22
  13  -3  10   -0.30    0.90
 -13  -3 -10   -0.32    0.28
 -13   3 -11    1.07    0.42
  13   3  11    1.40    0.87
 -13   3 -11    0.58    0.29
  13  -3  11   -0.40    1.04
 -13  -3 -11    0.10    0.26
 -13   3 -12    1.82    0.51
  13   3  12    1.43    1.04
  13  -3  12    3.17    1.77
 -13  -3 -12    1.23    0.47
 -13   3 -13    4.34    0.77
 -13  -3 -13    4.70    0.83
 -13   3 -14    0.95    0.34
 -13  -3 -14    0.64    0.37
 -13   3 -15    0.19    0.52
 -13   3 -15    0.14    0.22
 -13  -3 -15   -0.04    0.19
 -13   3 -16    0.32    0.37
 -13   3 -16    0.62    0.30
 -13  -3 -16    0.25    0.23
 -13   3 -17    0.49    0.41
 -13   3 -17    0.00    0.19
 -13  -3 -17   -0.05    0.15
 -13   3 -18   -0.02    0.20
 -13   3 -18    0.04    0.16
 -13  -3 -18    0.18    0.14
 -13   3 -19   -0.04    0.12
 -13   3 -19    0.23    0.21
 -13  -5  20    0.40    0.22
 -13  -5  19    0.64    0.36
 -13  -5  18    2.18    0.69
 -13  -5  17    2.20    0.77
 -13  -5  16    1.76    0.73
 -13  -5  15    0.54    0.31
 -13  -5  14    3.89    0.81
 -13  -5  14    8.88    1.16
 -13  -5  13    0.25    0.38
 -13   5  12    2.23    0.94
 -13  -5  12    0.98    0.35
 -13  -5  12    2.09    0.62
 -13  -5  11    0.48    0.29
 -13   5  11    0.83    1.08
 -13  -5  11    0.24    0.38
 -13  -5  10    0.78    0.33
 -13  -5  10   -0.31    0.53
 -13   5  10    1.05    1.05
 -13  -5   9    8.53    1.20
 -13   5   9   12.63    3.18
 -13  -5   9   13.45    1.45
 -13  -5   8   12.09    1.49
 -13   5   8   16.08    3.43
 -13  -5   8   13.76    1.41
 -13   5   7    1.68    0.36
 -13  -5   7    2.04    0.67
 -13   5   7    2.73    1.69
 -13  -5   7    1.42    0.43
 -13   5   6    0.08    0.17
 -13   5   6    0.30    0.20
 -13  -5   6    0.20    0.21
 -13   5   6    0.46    0.75
 -13  -5   6    0.59    0.47
 -13   5   5    1.35    0.32
 -13  -5   5    1.89    0.43
 -13   5   5    2.22    1.26
 -13  -5   5    1.37    0.48
 -13   5   5    1.27    0.39
 -13  -5   4    0.17    0.17
 -13   5   4    0.29    0.15
 -13   5   4   -0.43    0.81
 -13  -5   4    0.17    0.18
 -13   5   4    0.10    0.18
 -13   5   3    7.70    2.00
 -13  -5   3    7.44    1.02
 -13  -5   3    7.80    0.99
 -13   5   3    7.23    0.73
 -13   5   3    6.44    0.86
 -13   5   3    6.77    0.67
 -13  -5   3    7.75    0.75
 -13   5   2    0.36    0.29
 -13  -5   2    0.02    0.10
 -13  -5   2    0.65    0.39
 -13   5   2    0.09    0.18
 -13   5   2    0.15    0.20
 -13  -5   1   18.68    1.54
 -13  -5   1   16.94    1.43
 -13   5   1   20.30    1.18
 -13  -5   1   16.07    0.98
 -13  -5   0    1.43    0.41
 -13   5   0    1.22    0.40
 -13  -5   0    1.60    0.50
  13  -5   0    0.43    0.43
 -13   5   0    1.21    0.35
  13  -5   1    1.64    0.77
 -13  -5  -1    1.89    0.48
 -13   5  -1    1.32    0.37
 -13  -5  -1    1.55    0.44
 -13   5  -1    1.94    0.53
 -13   5  -1    1.79    0.41
 -13   5  -2    5.28    0.80
  13  -5   2    3.63    1.28
 -13  -5  -2    4.77    0.69
 -13   5  -2    4.64    0.66
 -13  -5  -2    4.07    0.66
 -13  -5  -2    4.54    0.68
  13  -5   3    6.39    1.81
 -13   5  -3    7.68    0.91
 -13  -5  -3    6.81    0.83
 -13  -5  -3    6.07    0.84
 -13   5  -3    7.93    0.96
  13  -5   4    3.35    1.31
 -13   5  -4    4.04    0.65
 -13   5  -4    2.81    0.64
 -13  -5  -4    3.92    0.62
 -13  -5  -4    3.92    0.70
  13  -5   5    0.81    0.88
 -13   5  -5   -0.04    0.12
 -13   5  -5    0.69    0.34
 -13   5  -5    0.19    0.22
 -13  -5  -5    0.30    0.24
 -13  -5  -5    0.38    0.29
 -13   5  -6    2.08    0.46
 -13   5  -6    1.21    0.39
 -13  -5  -6    1.72    0.37
  13   5   6    1.34    0.73
 -13   5  -6    1.47    0.33
 -13   5  -6    1.20    0.46
 -13  -5  -6    1.25    0.38
  13  -5   6    1.09    0.91
 -13   5  -7    0.58    0.27
 -13   5  -7    0.37    0.23
  13   5   7   -0.84    1.17
 -13  -5  -7    0.21    0.18
 -13  -5  -7    0.51    0.30
  13  -5   7    1.07    1.37
 -13   5  -8    2.16    0.47
  13   5   8    2.33    1.16
 -13   5  -8    1.88    0.38
 -13  -5  -8    2.17    0.50
  13  -5   8    2.07    1.63
 -13   5  -9   -0.31    0.26
  13   5   9   -0.39    0.71
 -13  -5  -9    0.01    0.20
  13  -5   9    0.06    0.79
  13  -5  10    0.61    0.98
 -13   5 -10   -0.06    0.20
  13   5  10    1.17    1.31
 -13  -5 -10   -0.10    0.26
  13  -5  11    5.46    2.26
 -13   5 -11    6.86    0.93
  13   5  11    7.80    2.60
 -13   5 -11    6.82    0.97
 -13  -5 -11    7.45    0.95
 -13   5 -12    0.37    0.29
 -13   5 -12    0.28    0.22
 -13  -5 -12    0.03    0.16
 -13   5 -13    8.22    1.07
 -13   5 -13    8.27    0.85
 -13  -5 -13   10.95    1.15
 -13   5 -14    5.71    0.89
 -13  -5 -14    8.83    0.99
 -13   5 -15    3.42    0.92
 -13   5 -15    2.57    0.59
 -13  -5 -15    3.26    0.54
 -13   5 -16    3.66    0.84
 -13   5 -16    2.97    0.58
 -13   5 -17    0.93    0.42
 -13   5 -17    0.52    0.26
 -13   5 -18    2.34    0.44
 -13   5 -18    3.76    0.68
 -13   5 -19    0.05    0.12
 -13   5 -19   -0.06    0.12
 -13  -7  19    1.15    0.35
 -13  -7  18    0.15    0.18
 -13  -7  17    0.51    0.42
 -13  -7  16    0.78    0.46
 -13  -7  16    0.13    0.20
 -13  -7  15    0.40    0.37
 -13  -7  15    1.12    0.51
 -13  -7  14   10.69    1.38
 -13  -7  14    7.15    1.13
 -13  -7  13   -0.60    0.58
 -13  -7  13   -0.42    0.48
 -13  -7  12    3.62    0.77
 -13  -7  12    3.49    0.81
 -13  -7  11   -0.41    0.38
 -13  -7  11   -0.29    0.61
 -13  -7  10    0.18    0.20
 -13   7  10    1.12    1.09
 -13  -7  10   -0.03    0.48
 -13   7   9    7.04    2.49
 -13  -7   9    4.68    0.96
 -13  -7   9    6.83    1.02
 -13  -7   8    2.60    0.57
 -13  -7   8    2.73    0.88
 -13   7   8    1.72    1.14
 -13   7   7    0.85    1.12
 -13  -7   7    0.90    0.62
 -13   7   7    0.12    0.24
 -13  -7   7    0.35    0.31
 -13   7   6    0.04    0.72
 -13  -7   6    1.15    0.67
 -13  -7   6    0.43    0.26
 -13   7   6    0.66    0.35
 -13   7   5    0.25    0.23
 -13  -7   5    0.37    0.40
 -13   7   5    0.08    0.74
 -13   7   4    6.55    2.28
 -13  -7   4    8.87    1.24
 -13   7   4    6.94    0.96
 -13   7   3   11.42    1.26
 -13  -7   3   15.01    1.54
 -13   7   2    0.18    0.28
 -13  -7   2    0.20    0.18
 -13  -7   1    2.08    0.58
 -13   7   1    1.25    0.43
 -13   7   0    1.34    0.51
 -13  -7   0    0.50    0.36
 -13   7  -1    3.35    0.76
 -13  -7  -1    2.35    0.56
 -13   7  -1    1.90    0.46
 -13   7  -2   35.67    1.98
 -13   7  -2   31.57    2.12
 -13  -7  -2   30.44    1.78
 -13   7  -3   11.73    1.28
 -13  -7  -3    9.88    0.95
 -13   7  -3   10.43    1.16
  13  -7   3   10.33    2.61
  13  -7   4    0.95    0.92
 -13   7  -4    1.48    0.52
 -13   7  -4    1.53    0.48
 -13   7  -5   10.64    0.98
 -13   7  -5   12.91    1.34
  13  -7   5   12.17    2.97
 -13   7  -5   13.14    1.29
  13  -7   6    6.70    2.32
 -13   7  -6    5.70    0.87
 -13   7  -6    5.09    0.69
 -13   7  -6    5.81    0.91
  13  -7   7    3.47    1.71
 -13   7  -7    3.72    0.65
 -13  -7  -7    4.00    0.68
 -13   7  -7    4.15    0.69
 -13   7  -8    0.12    0.18
  13  -7   8   -0.17    0.60
  13   7   8   -0.63    0.58
 -13   7  -8   -0.19    0.22
 -13  -7  -8   -0.05    0.22
  13  -7   9    0.72    0.87
 -13   7  -9    0.06    0.15
 -13   7  -9    0.09    0.20
  13   7   9   -0.10    1.00
 -13  -7  -9    0.05    0.15
 -13   7 -10    0.19    0.22
 -13  -7 -10   -0.07    0.27
 -13   7 -11    3.40    0.70
 -13   7 -12    0.14    0.24
 -13   7 -12    0.40    0.32
 -13   7 -13    1.61    0.48
 -13   7 -13    1.54    0.44
 -13   7 -14    4.13    0.73
 -13   7 -14    5.15    0.99
 -13   7 -15    1.69    0.53
 -13   7 -15    1.27    0.38
 -13   7 -16    1.33    0.45
 -13   7 -16    0.99    0.32
 -13   7 -17    1.57    0.43
 -13   7 -17    1.71    0.37
 -13   7 -18    0.31    0.15
 -13  -9  16    1.48    0.40
 -13  -9  16    1.23    0.38
 -13  -9  15    0.95    0.34
 -13  -9  15    1.33    0.47
 -13  -9  14    0.29    0.23
 -13  -9  14    0.55    0.49
 -13  -9  13    0.23    0.38
 -13  -9  13    0.15    0.17
 -13  -9  12   -0.86    0.67
 -13  -9  11   -0.54    0.59
 -13  -9  10    0.07    0.66
 -13  -9   9    0.89    0.43
 -13  -9   8    1.93    0.77
 -13   9   7    0.95    0.35
 -13   9   7    1.54    1.23
 -13  -9   7    1.44    0.82
 -13  -9   6    1.31    0.65
 -13   9   6    0.52    0.33
 -13   9   5    1.79    1.27
 -13   9   5    1.10    0.44
 -13  -9   5    2.41    0.76
 -13   9   4    0.92    1.00
 -13   9   4    0.63    0.38
 -13  -9   4    1.11    0.55
 -13   9   3    0.06    0.21
 -13  -9   3   -0.17    0.36
 -13  -9   2    1.38    0.51
 -13  -9   1    2.31    0.64
 -13  -9   0    1.89    0.53
 -13   9   0    0.60    0.28
 -13  -9  -1    1.77    0.52
 -13   9  -1    0.57    0.36
 -13  -9  -2   10.68    1.07
 -13   9  -2    8.77    1.15
 -13   9  -3    0.45    0.41
 -13   9  -3    0.30    0.27
 -13   9  -3    0.26    0.24
 -13   9  -4   15.76    1.65
 -13   9  -4   14.39    1.28
 -13   9  -4   16.76    1.50
 -13   9  -5    6.62    1.04
 -13   9  -5    5.71    0.85
 -13   9  -5    4.79    0.94
 -13   9  -6    0.49    0.33
 -13   9  -6    0.36    0.23
 -13   9  -6    0.33    0.39
 -13   9  -7   -0.14    0.26
 -13   9  -7    0.09    0.35
 -13   9  -8    8.17    1.05
 -13   9  -8    7.48    0.95
 -13   9  -9    3.52    0.73
 -13   9  -9    3.78    0.60
 -13   9 -10   -0.24    0.22
 -13   9 -11    1.46    0.49
 -13   9 -12    2.00    0.50
 -13   9 -13    1.91    0.46
 -13   9 -13    1.81    0.45
 -13   9 -13    1.38    0.39
 -13   9 -14    2.64    0.51
 -13   9 -14    2.13    0.48
 -13   9 -14    1.62    0.34
 -13   9 -15    1.40    0.34
 -13   9 -15    1.08    0.32
 -13   9 -16    0.67    0.21
 -13 -11  15    0.40    0.32
 -13 -11  14    0.09    0.30
 -13 -11  13    2.04    0.63
 -13 -11  12    3.85    0.91
 -13 -11  11    0.48    0.33
 -13 -11  10    7.34    1.22
 -13 -11   9   -0.05    0.46
 -13 -11   8    4.42    1.08
 -13 -11   7   11.38    1.66
 -13  11   7    9.00    1.05
 -13  11   6    2.05    0.58
 -13 -11   6    2.63    0.85
 -13  11   5    1.72    0.58
 -13 -11   5    1.18    0.47
 -13  11   4    0.33    0.37
 -13 -11   4    0.02    0.32
 -13  11   3    3.29    0.81
 -13 -11   3    4.77    0.94
 -13  11   2   -0.05    0.26
 -13 -11   2    0.65    0.42
 -13  11   2    0.60    0.51
 -13 -11   1    6.04    0.97
 -13  11   1    4.76    0.86
 -13 -11   0    0.62    0.30
 -13  11   0    0.78    0.39
 -13  11  -1    0.22    0.25
 -13  11  -2    3.92    0.94
 -13  11  -2    3.13    0.63
 -13  11  -3    2.51    0.74
 -13  11  -3    2.19    0.52
 -13  11  -3    2.07    0.59
 -13  11  -4    1.64    0.56
 -13  11  -4    2.30    0.56
 -13  11  -4    1.50    0.53
 -13  11  -5    1.37    0.58
 -13  11  -5    0.77    0.35
 -13  11  -5    0.95    0.42
 -13  11  -6    1.09    0.44
 -13  11  -6    1.14    0.36
 -13  11  -7    0.67    0.38
 -13  11  -7    0.02    0.17
 -13  11  -8   -0.15    0.27
 -13  11  -8    0.11    0.21
 -13  11  -9    0.09    0.16
 -13  11  -9    0.03    0.15
 -13  11 -10    0.32    0.25
 -13  11 -11    0.15    0.20
 -13  11 -12    0.18    0.15
 -13  11 -12    0.00    0.19
 -13  11 -13    0.14    0.19
 -13  11 -13    0.03    0.12
 -13 -13  12    0.41    0.29
 -13 -13  11    1.26    0.50
 -13 -13  10    1.23    0.51
 -13 -13   9   -0.46    0.38
 -13 -13   8   -0.68    0.56
 -13 -13   7    0.76    0.31
 -13 -13   6    0.32    0.26
 -13  13   6   -0.18    0.28
 -13  13   6    0.26    0.21
 -13  13   5    1.20    0.44
 -13 -13   5    1.08    0.41
 -13  13   5    0.72    0.29
 -13 -13   4    0.78    0.36
 -13  13   4    0.69    0.27
 -13  13   4    0.92    0.46
 -13  13   3    0.40    0.33
 -13 -13   3    0.02    0.25
 -13  13   3    0.97    0.42
 -13  13   2    3.44    0.82
 -13 -13   2    5.13    0.81
 -13  13   2    5.40    0.83
 -13  13   1    3.84    0.88
 -13  13   1    4.97    0.78
 -13  13   0    0.93    0.65
 -13  13   0    0.05    0.25
 -13  13  -1    3.11    0.86
 -13  13  -1    3.38    0.62
 -13  13  -2    0.99    0.52
 -13  13  -2    0.59    0.26
 -13  13  -2    1.19    0.38
 -13  13  -3    2.53    0.70
 -13  13  -3    2.37    0.55
 -13  13  -4    3.72    0.81
 -13  13  -4    2.72    0.52
 -13  13  -5    0.30    0.30
 -13  13  -5    0.02    0.21
 -13  13  -6    0.08    0.20
 -13  13  -6    0.14    0.19
 -13  13  -7    0.06    0.21
 -13  13  -7   -0.04    0.21
 -13  13  -8    0.14    0.19
 -13  13  -8    0.23    0.16
 -13  13  -9    1.64    0.34
 -13  13 -10    0.63    0.22
 -13  13 -11   -0.27    0.21
 -13  15   5    0.00    0.11
 -13  15   4    1.13    0.33
 -13  15   3    2.40    0.50
 -13  15   2    1.81    0.46
 -13  15   1    0.20    0.25
 -13  15   0    0.44    0.31
 -13  15  -1    0.36    0.30
 -13  15  -2    2.13    0.53
 -13  15  -2    0.61    0.24
 -13  15  -3    0.93    0.35
 -13  15  -4   -0.14    0.23
 -13  15  -5   -0.57    0.24
 -13  15  -6   -0.11    0.16
 -14   0  20   -0.03    0.19
 -14   0  19    0.31    0.30
 -14   0  18    0.48    0.34
 -14   0  17    1.55    0.64
 -14   0  16    2.92    0.84
 -14   0  15   -0.45    0.56
 -14   0  14   -0.10    0.58
 -14   0  13   -0.08    0.54
 -14   0  12   27.23    2.28
 -14   0  11    7.60    1.17
 -14   0  10   20.10    1.83
 -14   0   9   55.12    2.22
 -14   0   9   66.45    3.21
 -14   0   8    1.16    0.44
 -14   0   8    0.97    0.33
 -14   0   7    1.00    0.39
 -14   0   7    1.03    0.36
 -14   0   7    0.20    0.57
 -14   0   6   39.62    1.96
 -14   0   6   33.83    4.28
 -14   0   6   30.36    1.96
 -14   0   5   -0.37    0.55
 -14   0   5    0.06    0.15
 -14   0   5    0.04    0.10
 -14   0   4    4.37    1.43
 -14   0   4    4.35    0.52
 -14   0   4    4.18    0.70
 -14   0   3   21.64    1.19
 -14   0   3   23.49    2.98
 -14   0   3   21.75    1.50
 -14   0   2   25.66    1.34
 -14   0   2   25.27    2.83
 -14   0   2   28.40    1.65
  14   0  -1    8.02    1.24
 -14   0   1    6.53    1.31
 -14   0   1    7.44    0.71
 -14   0   1    8.61    0.86
 -14   0   0    2.32    0.45
 -14   0   0    2.55    0.46
  14   0   0    2.31    0.84
 -14   0  -1    0.62    0.25
  14   0   1    0.40    0.50
 -14   0  -1    0.47    0.26
 -14   0  -1    0.39    0.18
 -14   0  -2    0.14    0.12
  14   0   2    0.23    0.28
 -14   0  -2    0.23    0.19
 -14   0  -2    0.18    0.16
 -14   0  -3    2.34    0.47
 -14   0  -3    2.01    0.36
  14   0   3    2.12    1.05
 -14   0  -3    1.72    0.43
 -14   0  -3    2.37    0.45
 -14   0  -4    3.28    0.57
  14   0   4    3.99    1.42
 -14   0  -4    4.53    0.66
 -14   0  -4    4.24    0.66
  14   0   5    2.68    1.29
 -14   0  -5    3.57    0.63
 -14   0  -5    2.54    0.49
  14   0   6   12.93    2.80
 -14   0  -6   14.46    1.18
 -14   0  -6   15.28    1.36
 -14   0  -7    5.29    0.69
  14   0   7    4.38    1.64
 -14   0  -7    4.69    0.83
 -14   0  -8    0.90    0.34
  14   0   8    0.91    1.18
 -14   0  -8    1.55    0.38
  14   0   9   22.28    4.13
 -14   0  -9   25.68    1.47
 -14   0  -9   20.71    1.22
 -14   0 -10   27.94    1.60
  14   0  10   25.80    4.62
 -14   0 -10   28.37    1.49
 -14   0 -10   23.93    2.04
 -14   0 -11    1.60    0.59
 -14   0 -11    1.82    0.42
  14   0  11    1.90    1.61
 -14   0 -12    3.48    0.65
 -14   0 -12    5.35    1.14
  14   0  12    4.25    2.07
 -14   0 -13    1.04    0.60
 -14   0 -13    0.72    0.34
 -14   0 -14    4.50    0.93
 -14   0 -14    4.56    0.77
 -14   0 -15   24.64    1.77
 -14   0 -15   25.97    2.10
 -14   0 -16    1.52    0.42
 -14   0 -16    1.54    0.52
 -14   0 -17    0.61    0.28
 -14   0 -17    0.46    0.29
 -14   0 -18   -0.01    0.15
 -14   0 -19    0.13    0.15
 -14  -2  21    3.52    0.56
 -14  -2  20   -0.03    0.18
 -14   2  19    0.18    0.16
 -14  -2  19    0.08    0.30
 -14   2  18    0.77    0.34
 -14  -2  18    1.59    0.63
 -14   2  17    0.11    0.27
 -14  -2  17    0.97    0.59
 -14   2  16    0.59    0.33
 -14  -2  16    0.51    0.43
 -14   2  15    0.60    0.33
 -14  -2  15   -0.87    0.67
 -14   2  14    0.90    0.34
 -14  -2  14    0.16    0.75
 -14   2  13    2.60    0.67
 -14  -2  13    0.49    0.59
 -14   2  12   -0.05    0.29
 -14  -2  12   -0.37    0.62
 -14   2  11    0.26    0.32
 -14  -2  11    0.28    0.26
 -14  -2  11    0.07    0.17
 -14  -2  10    4.55    0.86
 -14  -2  10    3.71    0.72
 -14   2  10    3.79    1.72
 -14   2  10    4.63    0.85
 -14   2   9    1.90    0.64
 -14  -2   9    1.41    0.50
 -14  -2   9    0.71    0.31
 -14   2   9    2.73    1.65
 -14   2   8    3.80    1.60
 -14   2   8    3.41    0.70
 -14  -2   8    3.26    0.68
 -14  -2   8    3.18    0.63
 -14  -2   7    3.33    0.67
 -14  -2   7    2.09    0.59
 -14   2   7    4.95    1.91
 -14  -2   7    3.21    0.51
 -14   2   7    4.67    0.76
 -14   2   6    0.59    0.80
 -14  -2   6    0.08    0.20
 -14  -2   6    0.40    0.25
 -14   2   6    0.30    0.28
 -14  -2   6    0.56    0.25
 -14   2   5    1.12    0.41
 -14  -2   5    1.93    0.51
 -14  -2   5    1.33    0.52
 -14  -2   5    1.49    0.36
 -14   2   5    1.21    0.77
 -14  -2   4    4.91    0.83
 -14   2   4    4.84    1.65
 -14  -2   4    5.01    0.66
 -14   2   4    4.16    0.52
 -14   2   4    3.49    0.66
 -14  -2   4    5.29    0.77
 -14  -2   3    0.06    0.15
 -14   2   3    0.27    0.16
 -14   2   3    0.74    0.71
 -14  -2   3    0.48    0.27
 -14  -2   3    0.33    0.20
 -14   2   3    0.33    0.22
 -14  -2   2    2.19    0.45
 -14   2   2    2.54    1.21
 -14  -2   2    2.92    0.64
 -14  -2   2    3.18    0.54
 -14   2   2    2.69    0.49
 -14   2   2    2.17    0.50
 -14   2   2    2.49    0.56
 -14  -2   1   15.44    1.33
  14   2  -1   14.82    2.00
 -14   2   1   12.52    2.24
  14  -2  -1   13.34    1.80
 -14   2   1   12.01    0.84
 -14  -2   1   13.10    1.06
 -14   2   1   13.36    1.08
 -14   2   1   12.14    1.05
 -14   2   1   13.44    1.17
 -14  -2   1   13.61    1.07
 -14   2   0    2.21    0.92
 -14   2   0    2.94    0.42
 -14   2   0    2.18    0.49
  14   2   0    3.38    1.20
 -14  -2   0    3.05    0.54
 -14   2   0    2.69    0.53
 -14  -2   0    2.99    0.52
 -14   2   0    3.40    0.60
 -14  -2   0    2.83    0.49
  14  -2   0    3.28    1.08
 -14   2  -1    6.54    0.78
  14   2   1    7.34    1.78
  14  -2   1    8.38    1.78
 -14   2  -1    7.40    0.70
 -14  -2  -1    7.27    0.77
 -14   2  -1    7.11    0.84
 -14  -2  -1    7.53    0.78
 -14   2  -1    7.70    0.85
 -14  -2  -1    8.34    0.80
 -14   2  -2    4.83    0.57
  14   2   2    4.50    1.55
 -14  -2  -2    3.10    0.54
 -14   2  -2    3.26    0.58
 -14   2  -2    4.49    0.62
 -14  -2  -2    3.58    0.57
 -14   2  -2    3.98    0.49
  14  -2   2    4.29    1.43
 -14   2  -2    4.49    0.66
 -14  -2  -2    3.14    0.49
 -14   2  -3   26.19    1.51
  14   2   3   19.62    3.28
  14  -2   3   27.97    3.63
 -14   2  -3   25.45    1.38
 -14  -2  -3   19.58    1.31
 -14   2  -3   19.72    1.43
 -14  -2  -3   22.81    1.44
 -14   2  -3   24.69    1.34
 -14   2  -3   25.71    1.58
 -14  -2  -3   23.87    1.33
  14   2   4   31.37    4.35
  14  -2   4   34.21    4.24
 -14  -2  -4   31.32    1.65
 -14   2  -4   30.66    1.83
 -14  -2  -4   33.79    1.82
 -14   2  -4   37.23    1.78
 -14   2  -4   33.56    1.71
 -14  -2  -4   33.58    1.66
 -14   2  -5    3.59    0.60
 -14  -2  -5    3.88    0.57
  14   2   5    3.83    1.65
 -14   2  -5    4.16    0.71
 -14  -2  -5    4.45    0.72
 -14   2  -5    3.87    0.65
  14  -2   5    2.84    1.35
 -14   2  -6    1.28    0.42
  14   2   6    1.76    1.16
 -14  -2  -6    1.68    0.39
  14  -2   6    1.87    1.17
 -14   2  -6    1.73    0.50
 -14  -2  -6    1.76    0.47
 -14   2  -7    2.13    0.55
  14   2   7    2.79    1.49
 -14  -2  -7    2.95    0.65
 -14  -2  -7    2.88    0.47
  14  -2   7    2.04    1.37
 -14   2  -7    3.10    0.60
 -14   2  -8    2.31    0.55
 -14  -2  -8    3.77    0.54
 -14   2  -8    4.01    0.75
  14   2   8    4.43    2.09
 -14  -2  -8    3.59    0.76
  14  -2   8    2.58    1.51
 -14   2  -9    1.80    0.51
 -14   2  -9    3.49    0.55
 -14  -2  -9    2.49    0.42
 -14   2  -9    3.80    0.67
  14   2   9    4.53    1.88
  14  -2   9    2.86    1.68
 -14  -2  -9    2.95    0.68
 -14  -2 -10    9.46    0.94
 -14   2 -10    9.82    0.96
 -14   2 -10    9.52    0.99
  14   2  10   10.54    2.75
 -14  -2 -10    7.54    1.06
 -14   2 -10   10.10    1.37
  14  -2  10    9.73    2.82
 -14   2 -11    1.08    0.63
 -14  -2 -11    0.08    0.27
 -14   2 -11    0.70    0.31
  14   2  11    0.41    0.84
 -14   2 -11    0.27    0.21
  14  -2  11    0.49    0.59
 -14  -2 -11    0.52    0.21
 -14  -2 -12   -0.24    0.31
 -14   2 -12    0.02    0.16
 -14  -2 -12   -0.29    0.39
 -14   2 -13    1.26    0.84
 -14  -2 -13    0.20    0.20
 -14   2 -13    0.47    0.29
 -14  -2 -13    0.76    0.34
 -14   2 -14    0.48    0.56
 -14   2 -14    0.11    0.17
 -14  -2 -14   -0.09    0.22
 -14   2 -15    5.90    0.86
 -14  -2 -15    6.01    0.97
 -14   2 -15    6.82    1.20
 -14   2 -16    7.46    0.95
 -14  -2 -16    7.53    0.99
 -14   2 -16    9.06    1.24
 -14   2 -17    0.00    0.25
 -14   2 -17   -0.07    0.21
 -14  -2 -17   -0.02    0.19
 -14   2 -18    0.06    0.18
 -14  -2 -18    0.68    0.26
 -14   2 -18    0.40    0.29
 -14  -2 -19    0.16    0.13
 -14   2 -19    0.10    0.14
 -14  -4  20    0.08    0.17
 -14  -4  19    0.94    0.44
 -14  -4  18    0.66    0.44
 -14  -4  17    2.10    0.80
 -14  -4  16    0.46    0.47
 -14  -4  15   -0.23    0.44
 -14  -4  14   -1.04    0.85
 -14   4  14    0.41    0.26
 -14  -4  13    2.19    0.36
 -14  -4  13    3.29    0.75
 -14   4  13    3.81    0.73
 -14  -4  12   -0.13    0.49
 -14  -4  12    0.71    0.42
 -14   4  12   -0.10    1.17
 -14   4  12    1.38    0.51
 -14  -4  11    8.80    1.24
 -14   4  11   14.47    3.38
 -14   4  11   13.95    1.38
 -14  -4  11   13.43    1.63
 -14  -4  10    1.83    0.59
 -14  -4  10    1.28    0.43
 -14   4  10    3.26    1.70
 -14   4  10    2.71    0.62
 -14   4   9    0.52    0.36
 -14  -4   9    0.35    0.28
 -14  -4   9   -0.34    0.43
 -14   4   9    0.00    0.67
 -14   4   8   10.17    2.69
 -14  -4   8    7.03    1.06
 -14   4   8    9.04    1.00
 -14  -4   8    8.74    1.14
 -14   4   7   -0.14    0.29
 -14  -4   7    0.43    0.30
 -14   4   7   -0.61    0.96
 -14  -4   7    0.12    0.21
 -14  -4   6    7.26    1.06
 -14   4   6    8.50    2.48
 -14   4   6    7.01    0.82
 -14   4   6    6.42    0.89
 -14  -4   6    8.56    1.04
 -14   4   5    0.37    0.23
 -14   4   5    0.32    0.26
 -14   4   5    0.78    0.88
 -14  -4   5    0.63    0.35
 -14  -4   5    0.67    0.37
 -14  -4   5    0.55    0.30
 -14   4   4    1.76    0.43
 -14   4   4    2.30    1.16
 -14  -4   4    1.98    0.57
 -14  -4   4    2.21    0.57
 -14  -4   4    1.81    0.47
 -14   4   4    2.07    0.38
 -14   4   4    1.87    0.49
 -14  -4   3   18.66    1.69
 -14   4   3   21.78    3.51
 -14  -4   3   19.84    1.49
 -14   4   3   21.02    1.27
 -14   4   3   21.53    1.51
 -14   4   3   19.74    1.32
 -14  -4   3   17.91    1.31
 -14  -4   2    3.51    0.76
 -14  -4   2    3.39    0.63
 -14   4   2    3.32    0.59
 -14   4   2    3.40    0.62
 -14   4   2    2.98    0.55
 -14  -4   2    3.39    0.53
 -14   4   2    3.18    1.33
 -14   4   1    0.18    0.19
 -14  -4   1    0.24    0.13
  14  -4  -1   -0.04    0.27
 -14  -4   1    0.41    0.29
 -14  -4   1   -0.02    0.20
 -14   4   1    0.17    0.20
 -14   4   1    0.13    0.19
 -14   4   0    1.11    0.34
 -14  -4   0    1.57    0.35
  14  -4   0    1.12    0.62
 -14   4   0    1.31    0.40
 -14  -4   0    1.37    0.49
 -14   4   0    1.07    0.31
 -14  -4   0    1.35    0.44
 -14   4   0    1.21    0.38
  14  -4   1    0.99    0.65
 -14  -4  -1    0.99    0.29
 -14   4  -1    0.85    0.31
 -14  -4  -1    1.24    0.41
 -14   4  -1    0.99    0.30
 -14  -4  -1    1.06    0.39
 -14  -4  -1    1.17    0.40
 -14   4  -1    1.04    0.38
 -14   4  -1    1.07    0.36
  14  -4   2    2.32    1.12
 -14  -4  -2    1.53    0.34
 -14   4  -2    2.81    0.56
  14   4   2    1.50    1.01
 -14   4  -2    2.31    0.49
 -14  -4  -2    2.41    0.54
 -14  -4  -2    1.96    0.50
 -14   4  -2    1.78    0.48
 -14   4  -2    3.00    0.60
  14  -4   3    9.71    2.31
 -14   4  -3   10.72    1.00
  14   4   3    7.91    2.20
 -14  -4  -3    9.12    1.00
 -14  -4  -3    9.94    1.04
 -14   4  -3    9.38    0.79
 -14  -4  -3    9.14    0.76
 -14   4  -3   12.11    1.13
 -14   4  -4    7.20    0.88
  14   4   4    5.43    1.66
 -14  -4  -4    6.21    0.79
 -14  -4  -4    6.20    0.84
 -14   4  -4    5.75    0.80
 -14   4  -4    5.97    0.68
 -14  -4  -4    6.29    0.64
  14  -4   4    5.97    1.67
 -14   4  -5    0.87    0.33
 -14   4  -5    1.17    0.34
 -14   4  -5    1.11    0.41
  14   4   5    1.15    0.71
 -14  -4  -5    1.17    0.38
 -14  -4  -5    0.94    0.36
  14  -4   5    0.86    1.16
 -14   4  -6    0.01    0.23
 -14   4  -6   -0.03    0.18
 -14   4  -6    0.77    0.40
  14   4   6    0.65    0.97
 -14  -4  -6    0.59    0.30
 -14   4  -6    1.56    0.59
 -14  -4  -6   -0.13    0.25
  14  -4   6    0.29    0.95
 -14   4  -7    0.12    0.16
 -14   4  -7   -0.14    0.31
  14   4   7    1.09    1.17
 -14  -4  -7    0.04    0.17
 -14   4  -7    0.75    0.46
 -14  -4  -7   -0.13    0.22
  14  -4   7    0.05    0.61
 -14   4  -8   -0.78    0.49
 -14   4  -8    0.32    0.18
  14   4   8   -0.19    0.64
 -14   4  -8    0.98    0.40
 -14  -4  -8    0.16    0.24
  14  -4   8    1.54    1.23
 -14   4  -9   16.30    1.25
  14   4   9   22.71    4.44
  14  -4   9   17.31    4.12
 -14   4  -9   21.06    1.70
 -14  -4  -9   16.15    1.46
 -14   4  -9   12.85    1.52
 -14   4 -10    0.89    0.54
 -14   4 -10    0.94    0.34
  14   4  10    1.82    0.95
 -14   4 -10    1.26    0.46
 -14  -4 -10    0.68    0.19
  14  -4  10    1.19    1.36
 -14   4 -11    3.82    0.70
  14   4  11    4.74    1.96
 -14   4 -11    4.73    1.15
 -14   4 -11    3.75    0.67
 -14  -4 -11    3.58    0.69
  14  -4  11    3.43    1.84
 -14   4 -12    0.09    0.23
 -14   4 -12   -0.12    0.23
 -14  -4 -12   -0.14    0.23
 -14   4 -13    1.06    0.79
 -14   4 -13    0.05    0.16
 -14  -4 -13    0.55    0.30
 -14   4 -14    0.97    0.69
 -14   4 -14    0.39    0.30
 -14  -4 -14    0.62    0.35
 -14   4 -15    0.97    0.54
 -14   4 -15    0.69    0.32
 -14  -4 -15    0.75    0.33
 -14   4 -16    5.72    0.80
 -14  -4 -16    7.23    0.83
 -14   4 -16    6.86    1.07
 -14   4 -17    1.80    0.54
 -14   4 -17    1.66    0.41
 -14  -4 -17    2.22    0.39
 -14   4 -18   -0.04    0.21
 -14   4 -18   -0.15    0.15
 -14   4 -19   -0.03    0.14
 -14  -6  19    0.47    0.32
 -14  -6  18    0.08    0.18
 -14  -6  17    3.47    0.79
 -14  -6  16    0.77    0.45
 -14  -6  15    0.47    0.42
 -14  -6  15    0.94    0.40
 -14  -6  14    9.13    1.28
 -14  -6  14    6.67    1.12
 -14  -6  13   10.07    1.39
 -14  -6  13   10.02    1.39
 -14  -6  12    2.90    0.71
 -14  -6  12    3.08    0.82
 -14  -6  11    3.03    0.73
 -14  -6  11    1.87    0.61
 -14  -6  10    0.27    0.24
 -14  -6  10   -0.72    0.60
 -14   6  10    0.67    0.81
 -14  -6   9    1.42    0.50
 -14  -6   9    0.28    0.49
 -14  -6   8   13.94    1.64
 -14   6   8   13.99    3.35
 -14  -6   8   16.05    1.55
 -14  -6   7    3.86    0.95
 -14   6   7    3.47    1.92
 -14   6   7    3.78    0.61
 -14  -6   7    3.96    0.77
 -14   6   6    9.87    1.06
 -14  -6   6   10.05    1.39
[truncated: 162,954 more chars]
